# Supplementary material
Source: publisher figshare collection journal article supplement (https://gsajournals.figshare.com/ndownloader/files/26510936)
Supplement: Supplementary file 1 [file 26510936]

## Sheet: CBS 134246
Supplementary Table 5. The BLASTP analysis of homologues of the nectriaceous species genes in PHI-base
Gene id	Subject id	% identity	evalue	bit score
AR4307g12519	Q9UWF0#PHI:2108#CAM#318829#Magnaporthe_oryzae#reduced_virulence__loss_of_pathogenicity	100	3.36e-105	299
AR4307g6357	Q96VA7#PHI:251#FGA1#5507#Fusarium_oxysporum#reduced_virulence	99.717	0	736
AR4307g6425	I1S1V9#PHI:1604#GzOB045#5518#Fusarium_graminearum#unaffected_pathogenicity	99.31	7.77e-101	288
AR4307g11354	Q9HGU2#PHI:215__PHI:2285__PHI:2827__PHI:6315__PHI:7240#FMK1__Fmk1__fmk1#5507#Fusarium_oxysporum#loss_of_pathogenicity__unaffected_pathogenicity__reduced_virulence	99.143	0	726
AR4307g6694	I1RT81#PHI:6410__PHI:6604#FgCdc12__FaCdc12(FGSG_07380)#5518__282267#Fusarium_graminearum__Fusarium_asiaticum#reduced_virulence	98.701	0	791
AR4307g6433	A0A0D2Y8P9#PHI:7588#Foatg8#5507#Fusarium_oxysporum#reduced_virulence	98.305	2.07e-81	236
AR4307g12554	Q4HTT1#PHI:1468#GzCCAAT008#5518#Fusarium_graminearum#unaffected_pathogenicity	97.761	1.47e-90	261
AR4307g7359	I1RC95#PHI:1566#GzOB006#5518#Fusarium_graminearum#lethal	96.931	0	772
AR4307g12481	I1RRW3#PHI:1658#GzCCCH002#5518#Fusarium_graminearum#unaffected_pathogenicity	96.651	8.48e-154	427
AR4307g3586	I1RN81#PHI:3832#Fgcdc42#5518#Fusarium_graminearum#reduced_virulence	96.552	4.63e-124	350
AR4307g10901	I1RT36#PHI:1200__PHI:4587#(Gsk3)__Fgk3#5518#Fusarium_graminearum#reduced_virulence__loss_of_pathogenicity	96.447	0	793
AR4307g2149	G4MVC5#PHI:6927#MoRAD6#318829#Magnaporthe_oryzae#reduced_virulence	96.296	2.16e-92	275
AR4307g244	I1RAY2#PHI:1218#FGSG_00677#5518#Fusarium_graminearum#lethal	96.165	0	636
AR4307g5709	I1S050#PHI:1203#(Sc_Yck1/2/3)#5518#Fusarium_graminearum#reduced_virulence	96.026	0	905
AR4307g835	I1RJP0#PHI:3833#Fgrho2#5518#Fusarium_graminearum#reduced_virulence	95.98	2.28e-143	400
AR4307g12877	P0C431#PHI:1005__PHI:2327#FgHOG1__HOG1#5518#Fusarium_graminearum#reduced_virulence__unaffected_pathogenicity	95.798	0	721
AR4307g6571	I1REF2#PHI:3138#ELP3#5518#Fusarium_graminearum#reduced_virulence	95.414	0	1119
AR4307g10506	P53376#PHI:823#beta-tubulin#914237#Rhynchosporium_commune#chemistry_target:_resistance_to_chemical	95.116	0	847
AR4307g4829	Q96VL3#PHI:339#CLPT1#290576#Colletotrichum_lindemuthianum#reduced_virulence	95.074	4.7e-141	394
AR4307g7646	J4UUB6#PHI:6972#TpsA#176275#Beauveria_bassiana#reduced_virulence	94.919	0	977
AR4307g1394	T0LLS6#PHI:6703#CgRhoB#474922#Colletotrichum_gloeosporioides#reduced_virulence	94.872	7.71e-136	380
AR4307g7765	A0A0D2XDM3#PHI:4724#gls1#5507#Fusarium_oxysporum#unaffected_pathogenicity	94.61	0	1371
AR4307g1595	I1RYH0#PHI:6409#FgCdc11#5518#Fusarium_graminearum#reduced_virulence	94.444	0	694
AR4307g12751	Q4IQX3#PHI:1470#GzHMG002#5518#Fusarium_graminearum#reduced_virulence	94.444	2.49e-54	166
AR4307g2033	I1RSD5#PHI:1384#GzC2H047#5518#Fusarium_graminearum#reduced_virulence	94.304	2.1e-89	268
AR4307g2527	J4UI12#PHI:3271#ARSEF_2860#176275#Beauveria_bassiana#reduced_virulence	93.878	2.19e-170	479
AR4307g7630	I1RPQ7#PHI:6411#FgCdc10#5518#Fusarium_graminearum#unaffected_pathogenicity	93.787	0	667
AR4307g3494	I1RWQ2#PHI:1235#FGSG_08731#5518#Fusarium_graminearum#lethal	93.523	0	751
AR4307g8832	W7M5P0#PHI:2916#Ppr2#117187#Fusarium_verticillioides#unaffected_pathogenicity	93.514	0	1217
AR4307g4867	N4VQQ5#PHI:3280#CoRAS1#5465#Colletotrichum_orbiculare#lethal	93.427	5.59e-142	398
AR4307g10651	G4MYS1#PHI:4736#MoYpt7#318829#Magnaporthe_oryzae#loss_of_pathogenicity	93.171	1.88e-141	395
AR4307g240	I1RAX7#PHI:1563#GzOB003#5518#Fusarium_graminearum#unaffected_pathogenicity	93.125	3.02e-109	313
AR4307g1359	I1RKK5#PHI:1289#FGSG_04416#5518#Fusarium_graminearum#unaffected_pathogenicity	93.095	0	823
AR4307g7633	I1RPR1#PHI:2387#ACL2#5518#Fusarium_graminearum#loss_of_pathogenicity	92.843	0	926
AR4307g9392	I1RN31#PHI:1223#FGSG_05393#5518#Fusarium_graminearum#lethal	92.749	0	635
AR4307g11436	X0JB59#PHI:4679#FoSlt2#5507#Fusarium_oxysporum#reduced_virulence	92.619	0	799
AR4307g197	Q4IPZ1#PHI:1564#GzOB004#5518#Fusarium_graminearum#unaffected_pathogenicity	92.308	9.92e-51	156
AR4307g2800	I1S219#PHI:1652#GzWing024#5518#Fusarium_graminearum#unaffected_pathogenicity	92.308	1.9e-48	160
AR4307g1626	I1RXZ0#PHI:1467#GzCCAAT007#5518#Fusarium_graminearum#unaffected_pathogenicity	92.254	5.92e-91	262
AR4307g2706	I1RZL3#PHI:3996#FgFim#5518#Fusarium_graminearum#reduced_virulence	92.081	0	1196
AR4307g7634	I1S7N4#PHI:2386#ACL1#5518#Fusarium_graminearum#loss_of_pathogenicity	91.971	0	785
AR4307g2271	Q4WJS6#PHI:6753#GlcA#746128#Aspergillus_fumigatus#lethal	91.867	0	619
AR4307g6972	Q6XPX0#PHI:300__PHI:2826#FGB1__Fgb1#5507#Fusarium_oxysporum#reduced_virulence__loss_of_pathogenicity	91.795	0	732
AR4307g11939	I1RA52#PHI:445#NOS1#5518#Fusarium_graminearum#reduced_virulence	91.525	0	881
AR4307g9074	I1RDY4#PHI:1869#GzZC184#5518#Fusarium_graminearum#unaffected_pathogenicity	91.171	0	1049
AR4307g3828	I1RV69#PHI:1234#FGSG_08133#5518#Fusarium_graminearum#lethal	91.156	0	4564
AR4307g10085	Q4WKG5#PHI:2530#TUB1#746128#Aspergillus_fumigatus#lethal__loss_of_pathogenicity	91.091	0	840
AR4307g5527	W7LTW0#PHI:3355__PHI:4514#Mads1__Fvmcm1#117187#Fusarium_verticillioides#unaffected_pathogenicity__reduced_virulence	91.071	2.3e-142	399
AR4307g12036	I1S095#PHI:861#RAS2#5518#Fusarium_graminearum#reduced_virulence	91.064	2.43e-156	443
AR4307g7036	Q5YCW8#PHI:337#CHS7#5507#Fusarium_oxysporum#reduced_virulence	91.018	0	640
AR4307g7098	X0JSI1#PHI:4680#FoMkk2#5507#Fusarium_oxysporum#reduced_virulence	90.96	0	988
AR4307g12074	I1REC7#PHI:6272#FgHSP90#5518#Fusarium_graminearum#reduced_virulence	90.922	0	1157
AR4307g6044	I1RGD6#PHI:1193#(Sc_Sky1)#5518#Fusarium_graminearum#reduced_virulence	90.716	0	944
AR4307g4809	I1RQ89#PHI:1641__PHI:2434#FgFlbA#5518#Fusarium_graminearum#reduced_virulence	90.702	0	932
AR4307g11898	I1RCB7#PHI:1567#GzOB007#5518#Fusarium_graminearum#unaffected_pathogenicity	90.588	1.35e-116	330
AR4307g2659	I1RCN2#PHI:1168__PHI:1171__PHI:1173#HDF1#5518#Fusarium_graminearum#reduced_virulence	90.486	0	925
AR4307g8425	I1S241#PHI:442#MSY1#5518#Fusarium_graminearum#reduced_virulence	90.47	0	1449
AR4307g3812	I1S0N5#PHI:1552#GzMyb016#5518#Fusarium_graminearum#unaffected_pathogenicity	90.34	0	1995
AR4307g11319	I1RTG5#PHI:6245#FaMyo2B#5518#Fusarium_graminearum#reduced_virulence	90.331	0	2965
AR4307g9532	I1RP88#PHI:1226#FGSG_05845#5518#Fusarium_graminearum#lethal	90.202	0	1191
AR4307g2145	I1RMA5#PHI:4041#spt3#5518#Fusarium_graminearum#reduced_virulence	90.164	3.16e-178	504
AR4307g2008	I1RSF7#PHI:1385#GzC2H048#5518#Fusarium_graminearum#unaffected_pathogenicity	90.147	0	902
AR4307g10148	I1RA06#PHI:6258#DHS#5518#Fusarium_graminearum#increased_virulence_(hypervirulence)__unaffected_pathogenicity	90.113	0	680
AR4307g180	I1RB37#PHI:6119#BTA1#5518#Fusarium_graminearum#reduced_virulence	89.952	0	1554
AR4307g5162	I1RW16#PHI:1178__PHI:4941#(Sc_Cdc28)__cdc2A#5518#Fusarium_graminearum#reduced_virulence__lethal__loss_of_pathogenicity	89.877	0	609
AR4307g2715	Q4WQK8#PHI:6111#CpcB#746128#Aspergillus_fumigatus#reduced_virulence	89.873	0	610
AR4307g11613	G4N4N6#PHI:4616#MoSFA1#318829#Magnaporthe_oryzae#reduced_virulence	89.737	0	706
AR4307g5116	A0A016PX00#PHI:4602#FDB2#5518#Fusarium_graminearum#reduced_virulence	89.406	0	3936
AR4307g10181	I1RA20#PHI:1244#FGSG_00337#5518#Fusarium_graminearum#unaffected_pathogenicity	89.32	0	776
AR4307g11058	I1RKH9#PHI:1177#nrc-2#5518#Fusarium_graminearum#reduced_virulence	89.233	0	1097
AR4307g7158	I1RYZ7#PHI:1013#GzGPA2#5518#Fusarium_graminearum#reduced_virulence	89.198	0	599
AR4307g233	G4MWX1#PHI:7134#MoRab5B#318829#Magnaporthe_oryzae#reduced_virulence	89.189	1.06e-141	397
AR4307g1160	I1RJV1#PHI:1366#GzCON7#5518#Fusarium_graminearum#reduced_virulence	89.153	0	598
AR4307g2689	I1RS24#PHI:1584#GzOB024#5518#Fusarium_graminearum#unaffected_pathogenicity	89.139	4.58e-175	485
AR4307g2333	I1RC32#PHI:2351__PHI:2353#AMT1#5518#Fusarium_graminearum#reduced_virulence	89.137	0	593
AR4307g3676	Q4IQT8#PHI:1618#GzFET5#5518#Fusarium_graminearum#unaffected_pathogenicity	89.116	0	547
AR4307g10334	A0A0D2YC96#PHI:4725#gbe1#5507#Fusarium_oxysporum#unaffected_pathogenicity	89.035	0	868
AR4307g2467	Q5AND9#PHI:7009#arf2#5476#Candida_albicans#reduced_virulence	88.889	1.99e-119	338
AR4307g11969	I1RYR6#PHI:1692#GzZC007#5518#Fusarium_graminearum#unaffected_pathogenicity	88.748	0	997
AR4307g2585	I1RE58#PHI:443#CBL1#5518#Fusarium_graminearum#reduced_virulence	88.739	0	807
AR4307g1958	E9F082#PHI:2323#mhk1#568076#Metarhizium_robertsii#reduced_virulence	88.642	0	2336
AR4307g2171	I1RM85#PHI:1959#GzZC274#5518#Fusarium_graminearum#unaffected_pathogenicity	88.525	0	1142
AR4307g10515	W7MHG4#PHI:2462#RGSB#117187#Fusarium_verticillioides#unaffected_pathogenicity	88.525	0	679
AR4307g10289	I1RS48#PHI:1202#(Sc_Cla4)#5518#Fusarium_graminearum#reduced_virulence	88.457	0	1396
AR4307g10418	G4N6S1#PHI:8610#gcn5_(MGG_03677)#318829#Magnaporthe_oryzae#reduced_virulence__unaffected_pathogenicity	88.295	0	725
AR4307g7053	I1RRM1#PHI:5029#gta2#5518#Fusarium_graminearum#unaffected_pathogenicity__reduced_virulence	88.261	0	855
AR4307g11615	I1S0H5#PHI:7717#FgOXP1#5518#Fusarium_graminearum#reduced_virulence	88.162	0	2469
AR4307g12600	I1S4N1#PHI:1427#GzC2H095#5518#Fusarium_graminearum#unaffected_pathogenicity	88.136	7.8e-175	503
AR4307g11310	I1RTF5#PHI:1532#GzLam001#5518#Fusarium_graminearum#unaffected_pathogenicity	87.975	2.07e-102	293
AR4307g12869	I1RK16#PHI:1833#GzZC148#5518#Fusarium_graminearum#unaffected_pathogenicity	87.946	0	1031
AR4307g10736	I1RCH5#PHI:1569#GzOB009#5518#Fusarium_graminearum#lethal	87.936	0	671
AR4307g10234	I1RRU2#PHI:1248#FGSG_06832#5518#Fusarium_graminearum#unaffected_pathogenicity	87.835	0	696
AR4307g10551	I1RBF3#PHI:9056#FgTRR_(FGSG_00871)#5518#Fusarium_graminearum#reduced_virulence	87.821	0	588
AR4307g9652	I1R9X6#PHI:8908#FgVPS28_(FGSG_00291)#5518#Fusarium_graminearum#reduced_virulence	87.815	6.56e-149	417
AR4307g2007	I1RSF7#PHI:1385#GzC2H048#5518#Fusarium_graminearum#unaffected_pathogenicity	87.77	0	682
AR4307g12915	I1RQL4#PHI:1165__PHI:1642__PHI:3109#RRG2__GzWing014__FgSKN7#5518#Fusarium_graminearum#unaffected_pathogenicity__reduced_virulence	87.71	0	1041
AR4307g9399	I1RN37#PHI:1374#GzC2H037#5518#Fusarium_graminearum#unaffected_pathogenicity	87.624	0	1498
AR4307g9118	I1RC52#PHI:6092#FgVps26#5518#Fusarium_graminearum#reduced_virulence	87.608	0	605
AR4307g10906	I1S8E2#PHI:1606#GzOB047#5518#Fusarium_graminearum#reduced_virulence	87.44	3.2e-134	377
AR4307g9705	I1RB71#PHI:1630#GzWing002#5518#Fusarium_graminearum#unaffected_pathogenicity	87.24	0	712
AR4307g12168	Q4HYQ4#PHI:1601#GzOB042#5518#Fusarium_graminearum#unaffected_pathogenicity	87.199	0	2430
AR4307g10782	I1RFZ8#PHI:1663#GzCCHC003#5518#Fusarium_graminearum#unaffected_pathogenicity	87.19	2.94e-126	359
AR4307g8340	Q2PEP0#PHI:576#NoxA#35717#Epichloe_festucae#enhanced_antagonism	87.074	0	1042
AR4307g2938	I1RRB0#PHI:7124#FgEB1#5518#Fusarium_graminearum#reduced_virulence	87.029	2.79e-147	420
AR4307g2594	I1RE51#PHI:1542#GzMyb006#5518#Fusarium_graminearum#unaffected_pathogenicity	86.982	0	1174
AR4307g5185	I1RVY6#PHI:1401#GzC2H064#5518#Fusarium_graminearum#unaffected_pathogenicity	86.848	0	756
AR4307g4818	I1RQ81#PHI:1582#GzOB022#5518#Fusarium_graminearum#unaffected_pathogenicity	86.774	0	566
AR4307g8093	Q00845#PHI:180#PELD#140110#Nectria_haematococca#reduced_virulence	86.695	5.02e-154	430
AR4307g3443	I1RWT7#PHI:1793#GzZC108#5518#Fusarium_graminearum#reduced_virulence	86.578	0	1361
AR4307g6626	I1REJ1#PHI:1662#GzCCHC002#5518#Fusarium_graminearum#unaffected_pathogenicity	86.556	0	883
AR4307g12034	I1S097#PHI:4660#Chs3b#5518#Fusarium_graminearum#lethal__reduced_virulence	86.519	0	1570
AR4307g2791	Q2PEN8#PHI:577#NoxB#35717#Epichloe_festucae#unaffected_pathogenicity	86.505	0	1055
AR4307g7849	I1RPV7#PHI:1227#FGSG_06089#5518#Fusarium_graminearum#lethal	86.464	0	7026
AR4307g12167	I1RZQ2#PHI:1004__PHI:1179__PHI:3377#STE7__(Sc_Ste7)__FgSte7#5518#Fusarium_graminearum#loss_of_pathogenicity__reduced_virulence	86.32	0	852
AR4307g8354	Q4IPC8#PHI:1531__PHI:5700#GzSsu72__ScOrtholog_SSU72#5518#Fusarium_graminearum#unaffected_pathogenicity__lethal	86.275	1.34e-171	476
AR4307g6875	I1S7F8#PHI:1553#GzMyb017#5518#Fusarium_graminearum#reduced_virulence	86.223	0	706
AR4307g10263	I1RW16#PHI:1178__PHI:4941#(Sc_Cdc28)__cdc2A#5518#Fusarium_graminearum#reduced_virulence__lethal__loss_of_pathogenicity	86.218	0	570
AR4307g12016	I1RZX9#PHI:1014#GzGPA3#5518#Fusarium_graminearum#unaffected_pathogenicity	86.197	0	650
AR4307g11859	I1RWG2#PHI:1242#FGSG_08631#5518#Fusarium_graminearum#unaffected_pathogenicity	86.183	0	714
AR4307g2483	I1RBR4#PHI:2908#Cyp51B#5518#Fusarium_graminearum#unaffected_pathogenicity__reduced_virulence	86.148	0	935
AR4307g8149	I1RWI5#PHI:1590#GzOB030#5518#Fusarium_graminearum#lethal	86.145	1.21e-91	265
AR4307g11123	I1RM25#PHI:1579#GzOB019#5518#Fusarium_graminearum#unaffected_pathogenicity	86.111	0	2071
AR4307g8170	I1RWG6#PHI:1187#(Sc_Dbf2/Dbf20)#5518#Fusarium_graminearum#reduced_virulence	86.103	0	1206
AR4307g7273	I1RWP4#PHI:1530#Gzsnd#5518#Fusarium_graminearum#unaffected_pathogenicity	86.102	0	1578
AR4307g7370	I1RC85#PHI:1204#(Sc_Cbk1)#5518#Fusarium_graminearum#reduced_virulence	86.064	0	1096
AR4307g2559	I1RE76#PHI:1571#GzOB011#5518#Fusarium_graminearum#unaffected_pathogenicity	85.987	2.43e-100	288
AR4307g882	I1RG99#PHI:6091#FgVps35#5518#Fusarium_graminearum#reduced_virulence	85.978	0	1600
AR4307g6674	E9DS54#PHI:8769#MaPpt1#92637#Metarhizium_acridum#unaffected_pathogenicity	85.865	0	882
AR4307g2263	I1RSU2#PHI:724__PHI:730#PKS9__KSA1#5518#Fusarium_graminearum#unaffected_pathogenicity	85.783	0	726
AR4307g11273	I1RTC2#PHI:1232#FGSG_07423#5518#Fusarium_graminearum#lethal	85.783	0	729
AR4307g10776	I1RFX8#PHI:1574#GzOB014#5518#Fusarium_graminearum#lethal	85.697	0	1449
AR4307g10062	I1RBN6#PHI:1799#GzZC114#5518#Fusarium_graminearum#unaffected_pathogenicity	85.645	0	1434
AR4307g7082	I1RT19#PHI:1387#GzBrlA#5518#Fusarium_graminearum#unaffected_pathogenicity	85.634	0	1163
AR4307g7862	G4N168#PHI:2063__PHI:2110#MCNA__MGG_07456.5#318829#Magnaporthe_oryzae#reduced_virulence__unaffected_pathogenicity	85.614	0	1035
AR4307g11696	I1RA81#PHI:1198#(Sc_Ssk2/Ssk22)#5518#Fusarium_graminearum#reduced_virulence	85.565	0	2387
AR4307g3678	G4NCL5#PHI:877#MGG_00383#318829#Magnaporthe_oryzae#reduced_virulence	85.464	0	691
AR4307g4626	G4ND54#PHI:8041__PHI:8048#Moubc9__Ubc9#318829#Magnaporthe_oryzae#reduced_virulence	85.417	1.21e-93	275
AR4307g2229	Q870A3#PHI:315__PHI:7241#PacC__pacC#5507#Fusarium_oxysporum#reduced_virulence__increased_virulence_(hypervirulence)	85.399	0	969
AR4307g9419	I1RN54#PHI:1214#FGSG_07816#5518#Fusarium_graminearum#reduced_virulence	85.398	0	1492
AR4307g6450	I1V1W1#PHI:6207#BbCyp6#176275#Beauveria_bassiana#reduced_virulence	85.39	0	707
AR4307g2941	Q86ZP4#PHI:304#GzCPS1#5518#Fusarium_graminearum#reduced_virulence	85.389	0	2841
AR4307g10556	G4N6P6#PHI:8695#MoImd4_(MGG_03699)#318829#Magnaporthe_oryzae#reduced_virulence	85.389	0	927
AR4307g2582	A6N6J8#PHI:1021__PHI:2981#CTF1__Ctf1#5507#Fusarium_oxysporum#unaffected_pathogenicity__reduced_virulence	85.294	0	1539
AR4307g11461	I1RFM6#PHI:744#ADE5#5518#Fusarium_graminearum#reduced_virulence	85.246	0	1394
AR4307g5386	I1RAH1#PHI:4658#FgHXK1#5518#Fusarium_graminearum#reduced_virulence	84.969	0	865
AR4307g2016	I1RSE9#PHI:1917#GzZC232#5518#Fusarium_graminearum#reduced_virulence	84.94	0	1192
AR4307g3503	I1RWA9#PHI:1647#GzWing019#5518#Fusarium_graminearum#reduced_virulence	84.928	0	2069
AR4307g1175	I1RJT8#PHI:8909#FgVPS22_(FGSG_04120)#5518#Fusarium_graminearum#reduced_virulence	84.921	7.31e-151	424
AR4307g1971	I1RSI4#PHI:1587#GzOB027#5518#Fusarium_graminearum#unaffected_pathogenicity	84.889	0	1430
AR4307g6212	H9C592#PHI:2590__PHI:2611#CMLE#5507#Fusarium_oxysporum#loss_of_pathogenicity	84.865	0	654
AR4307g6976	I1RJR9#PHI:3375#FgSte50#5518#Fusarium_graminearum#loss_of_pathogenicity	84.848	0	841
AR4307g8684	I1RFJ2#PHI:1573#GzOB013#5518#Fusarium_graminearum#lethal	84.76	0	1675
AR4307g5482	I1R9M1#PHI:3834#Fgrho3#5518#Fusarium_graminearum#unaffected_pathogenicity	84.722	1.73e-130	368
AR4307g216	I1RB03#PHI:7559#FgGT2#5518#Fusarium_graminearum#loss_of_pathogenicity	84.688	0	939
AR4307g11456	I1S2L3#PHI:7283#Pg1#5518#Fusarium_graminearum#reduced_virulence__unaffected_pathogenicity	84.68	0	616
AR4307g12100	G4MPJ3#PHI:8038__PHI:8045#Mosmt3__Smt3#318829#Magnaporthe_oryzae#reduced_virulence	84.615	2.59e-43	143
AR4307g1356	I1RKK7#PHI:1267#FGSG_04418#5518#Fusarium_graminearum#unaffected_pathogenicity	84.525	0	1309
AR4307g1223	I1RK32#PHI:1293__PHI:3853#GzAPSES001__FgSWI6#5518#Fusarium_graminearum#reduced_virulence	84.502	0	1380
AR4307g12906	Q8TGD1#PHI:254#FOW1#5507#Fusarium_oxysporum#reduced_virulence	84.472	0	508
AR4307g12162	I1RZP6#PHI:1197__PHI:3862#(Snf1)__FgSNF1#5518#Fusarium_graminearum#reduced_virulence	84.379	0	1232
AR4307g12494	J5K8Q8#PHI:3270#ARSEF_2860#176275#Beauveria_bassiana#reduced_virulence	84.375	1.58e-170	475
AR4307g10518	I1RD19#PHI:1251#FGSG_01506#5518#Fusarium_graminearum#unaffected_pathogenicity	84.369	0	956
AR4307g1964	W7MUV5#PHI:5391#FvSO#117187#Fusarium_verticillioides#loss_of_pathogenicity	84.301	0	2045
AR4307g9135	I1RCC9#PHI:3089__PHI:4174#fac1__Fgac1#5518#Fusarium_graminearum#reduced_virulence__unaffected_pathogenicity	84.291	0	3543
AR4307g7386	I1RC71#PHI:2714#PEX5#5518#Fusarium_graminearum#reduced_virulence	84.227	0	1094
AR4307g7363	W7LZA5#PHI:3886#UBL1#117187#Fusarium_verticillioides#reduced_virulence	84.174	0	3714
AR4307g8644	I1RK79#PHI:1577#GzOB017#5518#Fusarium_graminearum#unaffected_pathogenicity	84.138	2.05e-92	266
AR4307g8159	I1RWH5#PHI:1589#GzOB029#5518#Fusarium_graminearum#unaffected_pathogenicity	84.082	4.33e-154	431
AR4307g1950	F9WWR1#PHI:4966#sdi1#1047171#Zymoseptoria_tritici#unaffected_pathogenicity	84.039	0	1077
AR4307g5199	J4W8U0#PHI:6280#bmiro#176275#Beauveria_bassiana#reduced_virulence	84.026	0	1084
AR4307g5382	I1RAH4#PHI:1562#GzOB002#5518#Fusarium_graminearum#lethal	84.02	0	1750
AR4307g11253	I1S5M8#PHI:1258#FGSG_12149#5518#Fusarium_graminearum#unaffected_pathogenicity	83.951	2.28e-148	432
AR4307g1182	I1RJT0#PHI:8913#FgVPS2_(FGSG_04112)#5518#Fusarium_graminearum#lethal	83.913	2.08e-114	328
AR4307g3673	I1RA89#PHI:1086#FGSG_00416#5518#Fusarium_graminearum#reduced_virulence	83.883	0	846
AR4307g3726	A0A0D2XWJ8#PHI:4727#gdb1#5507#Fusarium_oxysporum#reduced_virulence__unaffected_pathogenicity	83.871	0	2727
AR4307g2554	I1RE83#PHI:1288__PHI:6300#FGSG_01963__FgPDK1#5518#Fusarium_graminearum#unaffected_pathogenicity__reduced_virulence	83.784	0	676
AR4307g8755	G4MR98#PHI:2044#MoSOM1#318829#Magnaporthe_oryzae#loss_of_pathogenicity	83.784	3.81e-11	64.7
AR4307g7358	E9R5E2#PHI:2513#GFA1#746128#Aspergillus_fumigatus#lethal__loss_of_pathogenicity	83.761	0	1213
AR4307g2552	Q873Z8#PHI:285__PHI:7242#CHSV__chsV#5507#Fusarium_oxysporum#increased_virulence_(hypervirulence)__loss_of_pathogenicity	83.742	0	3270
AR4307g5920	G4MQZ2#PHI:2038#Mir1#318829#Magnaporthe_oryzae#unaffected_pathogenicity	83.729	3.3e-173	485
AR4307g3750	G2XJR0#PHI:8670#ACC_deaminase_(VDAG_10392)#27337#Verticillium_dahliae#reduced_virulence__increased_virulence_(hypervirulence)	83.721	0	598
AR4307g308	I1RY25#PHI:1167#NPC1#5518#Fusarium_graminearum#reduced_virulence	83.661	0	2232
AR4307g10970	I1RXV2#PHI:1758#GzZC073#5518#Fusarium_graminearum#unaffected_pathogenicity	83.558	0	1383
AR4307g5389	Q4WX65#PHI:2540#IPP1#746128#Aspergillus_fumigatus#lethal	83.509	0	510
AR4307g5384	I1RAH2#PHI:1629#GzWing001#5518#Fusarium_graminearum#unaffected_pathogenicity	83.436	0	1353
AR4307g12019	I1RZY1#PHI:1602#GzOB043#5518#Fusarium_graminearum#unaffected_pathogenicity	83.333	0	1209
AR4307g3064	I1RZ37#PHI:1237#FGSG_09660#5518#Fusarium_graminearum#lethal	83.121	0	1865
AR4307g12152	J9MZK9#PHI:2455#CRE1#5507#Fusarium_oxysporum#unaffected_pathogenicity	83.095	0	664
AR4307g12933	I1RRG0#PHI:1078#Mes1#5518#Fusarium_graminearum#reduced_virulence	83.093	0	1277
AR4307g6441	I1RKR8#PHI:1175__PHI:6148#(Sc_Srb10)__FgSsn3#5518#Fusarium_graminearum#reduced_virulence	83.08	0	781
AR4307g1994	Q4I6S5#PHI:6898#FgMon1#5518#Fusarium_graminearum#reduced_virulence	82.968	0	997
AR4307g12462	I1RRX7#PHI:1183#(Sc_Cmk1/Cmk2)#5518#Fusarium_graminearum#reduced_virulence	82.967	0	623
AR4307g3066	I1RZ39#PHI:1599#GzOB039#5518#Fusarium_graminearum#unaffected_pathogenicity	82.967	2.68e-102	294
AR4307g2056	I1RZG7#PHI:1551#GzMyb015#5518#Fusarium_graminearum#unaffected_pathogenicity	82.949	0	1307
AR4307g383	I1RDG6#PHI:1555#GzMyb019#5518#Fusarium_graminearum#unaffected_pathogenicity	82.941	0	906
AR4307g6539	I1REC4#PHI:6095#FgVps5#5518#Fusarium_graminearum#reduced_virulence	82.852	0	950
AR4307g9182	I1RPA0#PHI:1375#GzC2H038#5518#Fusarium_graminearum#unaffected_pathogenicity	82.84	0	853
AR4307g9616	I1RKF3#PHI:2418__PHI:2419#CID1#5518#Fusarium_graminearum#reduced_virulence	82.812	0	530
AR4307g7264	I1RWP1#PHI:1648__PHI:6246#GzWing020__Famyo2#5518#Fusarium_graminearum#reduced_virulence	82.75	0	3989
AR4307g10279	I1RS41#PHI:1529#Gzscp#5518#Fusarium_graminearum#reduced_virulence	82.705	0	1967
AR4307g457	I1RDI9#PHI:1634#GzWing006#5518#Fusarium_graminearum#unaffected_pathogenicity	82.677	5.48e-76	223
AR4307g2730	I1RZN4#PHI:1753#GzZC068#5518#Fusarium_graminearum#unaffected_pathogenicity	82.66	0	1311
AR4307g2598	I1RE46#PHI:1570#GzOB010#5518#Fusarium_graminearum#unaffected_pathogenicity	82.604	0	1482
AR4307g12697	J9MHC1#PHI:1103__PHI:2282#FOXG_02277__MeaB#5507#Fusarium_oxysporum#unaffected_pathogenicity__increased_virulence_(hypervirulence)	82.597	0	530
AR4307g1954	I1RSK0#PHI:1257#FGSG_07121#5518#Fusarium_graminearum#unaffected_pathogenicity	82.589	0	1127
AR4307g814	I1RJM9#PHI:1221#FGSG_04054#5518#Fusarium_graminearum#lethal	82.549	0	805
AR4307g2371	I1RC07#PHI:1348#GzC2H008#5518#Fusarium_graminearum#reduced_virulence	82.545	0	1326
AR4307g6958	I1RNL0#PHI:2409#FgMT2#5518#Fusarium_graminearum#reduced_virulence	82.534	0	936
AR4307g2857	I1RR41#PHI:6186#FgCHS8#5518#Fusarium_graminearum#reduced_virulence	82.508	0	1080
AR4307g12235	W7MG03#PHI:7141#Fsr1#117187#Fusarium_verticillioides#reduced_virulence	82.456	0	1442
AR4307g8663	Q4IEV4#PHI:1637#GzWing009#5518#Fusarium_graminearum#lethal	82.389	0	853
AR4307g5136	I1RMV6#PHI:1222#FGSG_05306#5518#Fusarium_graminearum#lethal	82.387	0	2628
AR4307g8390	J5K938#PHI:7057#PilA#176275#Beauveria_bassiana#reduced_virulence	82.353	0	542
AR4307g9782	G4N1E7#PHI:6637#Movps1#318829#Magnaporthe_oryzae#lethal	82.353	0	1160
AR4307g9687	I1RB84#PHI:1263#FGSG_00792#5518#Fusarium_graminearum#unaffected_pathogenicity	82.334	0	1066
AR4307g3441	E9EQM1#PHI:3817#mrGAT#568076#Metarhizium_robertsii#reduced_virulence	82.271	0	1203
AR4307g10995	I1RXX1#PHI:1006#HMR1#5518#Fusarium_graminearum#reduced_virulence	82.23	0	2012
AR4307g5131	Q0WXM3#PHI:734#FOW2#5507#Fusarium_oxysporum#loss_of_pathogenicity	82.18	0	1098
AR4307g6690	Q4I5U9#PHI:1231__PHI:1492#FGSG_07409__GzHMG024#5518#Fusarium_graminearum#lethal__unaffected_pathogenicity	82.166	0	758
AR4307g9699	I1RB79#PHI:1249#FGSG_00786#5518#Fusarium_graminearum#unaffected_pathogenicity	82.155	0	930
AR4307g10414	I1R9W2#PHI:1561#GzOB001#5518#Fusarium_graminearum#unaffected_pathogenicity	82.131	2.85e-160	450
AR4307g5867	I1RD63#PHI:6093#FgVps29#5518#Fusarium_graminearum#reduced_virulence	82.09	1.95e-117	333
AR4307g3060	I1RZ35#PHI:1598#GzOB038#5518#Fusarium_graminearum#reduced_virulence	82.09	1.99e-77	227
AR4307g12161	P0CT06#PHI:305#ICL1#318829#Magnaporthe_oryzae#reduced_virulence	82.084	0	931
AR4307g3645	G4N8I6#PHI:7133#MoRab5A#318829#Magnaporthe_oryzae#reduced_virulence	82.083	2.34e-116	334
AR4307g1120	G4MXS1#PHI:8611#pyruvate_kinase#318829#Magnaporthe_oryzae#unaffected_pathogenicity__reduced_virulence__loss_of_pathogenicity	82.061	0	907
AR4307g2533	J4VXB0#PHI:7150#eca1#176275#Beauveria_bassiana#reduced_virulence	82.046	0	1634
AR4307g2410	I1RBX1#PHI:5779#Fgsg01064#5518#Fusarium_graminearum#unaffected_pathogenicity	82	0	835
AR4307g12708	Q4HYC1#PHI:1201#(Bud32)#5518#Fusarium_graminearum#reduced_virulence	81.961	1.35e-153	431
AR4307g1578	I1RYF8#PHI:1236#FGSG_09408#5518#Fusarium_graminearum#lethal	81.944	0	1201
AR4307g45	I1S0Q0#PHI:1670#GzCCHC010#5518#Fusarium_graminearum#unaffected_pathogenicity	81.818	5.73e-95	276
AR4307g2698	I1RS32#PHI:1180#(Sc_Sat4)#5518#Fusarium_graminearum#reduced_virulence	81.746	0	840
AR4307g5714	I1S053#PHI:1772#GzZC087#5518#Fusarium_graminearum#reduced_virulence	81.707	0	1050
AR4307g4834	Q4X132#PHI:2548#KRR1#746128#Aspergillus_fumigatus#lethal	81.699	0	528
AR4307g12069	W7LS89#PHI:6262#FUG1#117187#Fusarium_verticillioides#reduced_virulence	81.629	0	842
AR4307g10320	I1RKC4#PHI:1169__PHI:1172#HDF2#5518#Fusarium_graminearum#reduced_virulence	81.604	0	1268
AR4307g250	I1RY42#PHI:1207__PHI:3178#(Sc_Kin1/Kin2)__FgKin1#5518#Fusarium_graminearum#reduced_virulence	81.59	0	1452
AR4307g2304	I1RZ11#PHI:1411#GzC2H078#5518#Fusarium_graminearum#lethal	81.513	2.12e-116	335
AR4307g7831	Q2V086#PHI:862#ClaSSD1#5462#Colletotrichum_lagenaria#loss_of_pathogenicity	81.485	0	1554
AR4307g8243	I1RX47#PHI:1666#GzCCHC006#5518#Fusarium_graminearum#unaffected_pathogenicity	81.457	0	757
AR4307g12776	G4MTG9#PHI:8734#MoLeu1_(MGG_01553)#318829#Magnaporthe_oryzae#loss_of_pathogenicity	81.436	0	1201
AR4307g10255	I1RCJ5#PHI:1212#(Sc_Rim15)#5518#Fusarium_graminearum#reduced_virulence	81.366	0	3063
AR4307g7600	I1RPM7#PHI:1376#GzC2H039#5518#Fusarium_graminearum#unaffected_pathogenicity	81.356	0	801
AR4307g11285	I1RTD1#PHI:1645#GzWing017#5518#Fusarium_graminearum#unaffected_pathogenicity	81.348	0	1368
AR4307g9407	I1RN43#PHI:1268#FGSG_05406#5518#Fusarium_graminearum#unaffected_pathogenicity	81.277	0	756
AR4307g8699	Q5YCX0#PHI:336#CHS2#5507#Fusarium_oxysporum#reduced_virulence	81.268	0	1720
AR4307g5801	G4NH84#PHI:8588#Moppe1#318829#Magnaporthe_oryzae#reduced_virulence	81.235	0	691
AR4307g9387	I1RN27#PHI:1638#GzWing010#5518#Fusarium_graminearum#unaffected_pathogenicity	81.219	0	954
AR4307g11609	I1S0G8#PHI:1247#FGSG_10196#5518#Fusarium_graminearum#unaffected_pathogenicity	81.184	0	1265
AR4307g6226	I1RYN7#PHI:1299#GzAT003#5518#Fusarium_graminearum#unaffected_pathogenicity	81.084	0	1556
AR4307g9194	I1RXF3#PHI:1511#GzHOME009#5518#Fusarium_graminearum#reduced_virulence	81.029	0	966
AR4307g7755	I1RT48#PHI:1216#FGSG_07344#5518#Fusarium_graminearum#reduced_virulence	80.96	0	1077
AR4307g1278	J5JJ15#PHI:7154#spf1#176275#Beauveria_bassiana#reduced_virulence	80.956	0	2221
AR4307g12157	I1RZP2#PHI:1667#GzCCHC007#5518#Fusarium_graminearum#unaffected_pathogenicity	80.922	0	763
AR4307g5419	I1RAE2#PHI:1241#FGSG_00469#5518#Fusarium_graminearum#unaffected_pathogenicity	80.814	0	847
AR4307g11134	I1RM35#PHI:1580#GzOB020#5518#Fusarium_graminearum#unaffected_pathogenicity	80.769	0	563
AR4307g9923	I1S074#PHI:8915#FgVPS32_(FGSG_10092)#5518#Fusarium_graminearum#lethal	80.717	5.96e-122	347
AR4307g11241	A0A016PTV5#PHI:5393#GLX#5518#Fusarium_graminearum#reduced_virulence	80.658	3.3e-145	430
AR4307g6517	I1S0Z2#PHI:1296#GzAPSES004#5518#Fusarium_graminearum#reduced_virulence	80.606	0	1093
AR4307g9511	G4N8Y3#PHI:3213#MoCDIP1#318829#Magnaporthe_oryzae#effector_(plant_avirulence_determinant)	80.563	0	548
AR4307g683	I1RR00#PHI:1228#FGSG_06502#5518#Fusarium_graminearum#lethal	80.541	0	881
AR4307g4067	I1RUM5#PHI:1807#GzZC122#5518#Fusarium_graminearum#lethal	80.518	0	1193
AR4307g4884	I1RZD4#PHI:1413#GzC2H080#5518#Fusarium_graminearum#unaffected_pathogenicity	80.517	0	1627
AR4307g5388	J5JBK6#PHI:7058#PilB#176275#Beauveria_bassiana#reduced_virulence	80.469	1.94e-150	433
AR4307g4027	I1RUG2#PHI:1233#FGSG_07855#5518#Fusarium_graminearum#lethal	80.457	0	754
AR4307g3496	I1RWQ0#PHI:1240__PHI:3088#FGSG_08729__CPK2#5518#Fusarium_graminearum#unaffected_pathogenicity__loss_of_pathogenicity	80.451	0	667
AR4307g5523	Q5J4D6#PHI:365__PHI:2267#MLS1__Mls1#13684#Parastagonospora_nodorum#loss_of_pathogenicity	80.407	0	918
AR4307g2862	Q4I8B6#PHI:1675#GzDHHC003#5518#Fusarium_graminearum#unaffected_pathogenicity	80.387	0	1259
AR4307g6883	I1RNS1#PHI:355#GzmetE#5518#Fusarium_graminearum#reduced_virulence	80.315	0	840
AR4307g2717	G4MRB4#PHI:4491#SHM#318829#Magnaporthe_oryzae#reduced_virulence	80.271	0	847
AR4307g9022	I1S0C0#PHI:1335__PHI:3110__PHI:3808__PHI:4244#GzbZIP017__FgATF1__Atf1__FgOS-2#5518#Fusarium_graminearum#reduced_virulence__increased_virulence_(hypervirulence)	80.263	0	795
AR4307g3688	G2WYZ0#PHI:7329#STT3#27337#Verticillium_dahliae#reduced_virulence	80.214	0	1234
AR4307g6719	I1S0Y9#PHI:1186#(Sc_Cdc15)#5518#Fusarium_graminearum#reduced_virulence	80.182	0	2174
AR4307g12443	I1RSR1#PHI:1797#GzZC112#5518#Fusarium_graminearum#unaffected_pathogenicity	80.065	0	1486
AR4307g6693	I1RT82#PHI:1287#FGSG_07381#5518#Fusarium_graminearum#unaffected_pathogenicity	80.043	0	761
AR4307g206	I1RB11#PHI:1443#GzGATA001#5518#Fusarium_graminearum#unaffected_pathogenicity	80	0	726
AR4307g3183	I1RIP4#PHI:3038#FgERG5B#5518#Fusarium_graminearum#reduced_virulence	80	0	842
AR4307g7157	G4MW66#PHI:2062__PHI:3815#Gph1__GPH1#318829#Magnaporthe_oryzae#unaffected_pathogenicity__loss_of_pathogenicity__reduced_virulence	79.977	0	1494
AR4307g7916	I1RJS7#PHI:1902#GzZC217#5518#Fusarium_graminearum#unaffected_pathogenicity	79.961	0	1623
AR4307g5705	I1S047#PHI:7673#FgLetm2#5518#Fusarium_graminearum#unaffected_pathogenicity__reduced_virulence	79.939	0	554
AR4307g195	I1RB16#PHI:1967#GzZC282#5518#Fusarium_graminearum#reduced_virulence	79.893	0	1230
AR4307g9879	J4WFU2#PHI:4107#BbMBF1#176275#Beauveria_bassiana#reduced_virulence	79.87	1.91e-86	252
AR4307g1685	I1R9N5#PHI:3910#FgSAT#5518#Fusarium_graminearum#unaffected_pathogenicity	79.846	0	828
AR4307g7054	I1RRM0#PHI:1891#GzZC206#5518#Fusarium_graminearum#unaffected_pathogenicity	79.818	0	1263
AR4307g12029	I1S0A1#PHI:1603#GzOB044#5518#Fusarium_graminearum#unaffected_pathogenicity	79.779	0	919
AR4307g12007	G4MQ14#PHI:7319#CON6#318829#Magnaporthe_oryzae#unaffected_pathogenicity	79.762	3.85e-40	128
AR4307g4933	P0CT09#PHI:7223#Moend3#318829#Magnaporthe_oryzae#reduced_virulence	79.648	0	660
AR4307g172	I1RB45#PHI:1301#GzbHLH002#5518#Fusarium_graminearum#unaffected_pathogenicity	79.612	2e-51	162
AR4307g5126	G4N572#PHI:5047__PHI:6635#MoFis1#318829#Magnaporthe_oryzae#reduced_virulence	79.592	2.14e-81	239
AR4307g1872	I1S2F2#PHI:1500#GzHMG032#5518#Fusarium_graminearum#unaffected_pathogenicity	79.42	0	2330
AR4307g7963	I1RX04#PHI:1406#GzC2H070#5518#Fusarium_graminearum#lethal	79.375	0	942
AR4307g8327	P32964#PHI:143#CHT#5563#Gloeocercospora_sorghi#unaffected_pathogenicity	79.37	0	584
AR4307g11053	I1S5Z3#PHI:1685#GzRad003#5518#Fusarium_graminearum#unaffected_pathogenicity	79.354	0	879
AR4307g12492	Q4I7F9#PHI:1458#GzAra006#5518#Fusarium_graminearum#unaffected_pathogenicity	79.343	0	1122
AR4307g12096	I1RCK0#PHI:1920#GzZC235#5518#Fusarium_graminearum#unaffected_pathogenicity	79.302	0	1334
AR4307g2555	I1RE80#PHI:3037#FgERG5A#5518#Fusarium_graminearum#reduced_virulence	79.291	0	932
AR4307g6389	I1RNI6#PHI:1309#GzbHLH010#5518#Fusarium_graminearum#lethal	79.288	7.42e-167	468
AR4307g1172	I1RJU1#PHI:6573#FgNoxR#5518#Fusarium_graminearum#reduced_virulence	79.271	0	818
AR4307g2021	I1RSE4#PHI:1096#FGSG_07062#5518#Fusarium_graminearum#unaffected_pathogenicity	79.259	0	684
AR4307g11959	I1RQE9#PHI:1317#GzBrom002#5518#Fusarium_graminearum#reduced_virulence	79.247	0	1719
AR4307g5600	I1RU98#PHI:6126__PHI:5751#FGSG_07783__ScOrtholog_DIA3#5518#Fusarium_graminearum#unaffected_pathogenicity__reduced_virulence	79.204	0	767
AR4307g5125	I1RMW3#PHI:6408__PHI:6603#FgCdc3__FaCdc3_(FGSG_05315.3)#5518__282267#Fusarium_graminearum__Fusarium_asiaticum#reduced_virulence	79.203	0	892
AR4307g6971	I1RJS3#PHI:1162#BDM1#5518#Fusarium_graminearum#reduced_virulence__unaffected_pathogenicity	79.181	8.72e-168	469
AR4307g10207	Q4IR08#PHI:1608#GzP53L001#5518#Fusarium_graminearum#unaffected_pathogenicity	79.167	1.95e-138	394
AR4307g5373	I1RAI5#PHI:1319#GzbZIP001#5518#Fusarium_graminearum#reduced_virulence	79.146	0	971
AR4307g12606	I1RGF4#PHI:1306#GzbHLH007#5518#Fusarium_graminearum#unaffected_pathogenicity	79.062	6.79e-168	472
AR4307g12765	I1RYY6#PHI:6094#FgVps17#5518#Fusarium_graminearum#reduced_virulence	79.024	0	919
AR4307g2181	I1RM32#PHI:9048#FgSpo7_(FGSG_05009)#5518#Fusarium_graminearum#reduced_virulence	78.96	0	620
AR4307g5099	I1RE94#PHI:1572#GzOB012#5518#Fusarium_graminearum#unaffected_pathogenicity	78.929	0	1407
AR4307g6368	I1RNG8#PHI:1176#(Sc_Atg1)#5518#Fusarium_graminearum#reduced_virulence	78.904	0	1434
AR4307g2298	G4MZY1#PHI:2034#MFP1#318829#Magnaporthe_oryzae#reduced_virulence	78.883	0	1447
AR4307g7174	E3QJK7#PHI:6827#GPI8#31870#Colletotrichum_graminicola#loss_of_pathogenicity	78.88	0	631
AR4307g6423	I1SAP7#PHI:1624#GzJUM006#5518#Fusarium_graminearum#unaffected_pathogenicity	78.878	0	978
AR4307g11329	I1RZK5#PHI:1600#GzOB041#5518#Fusarium_graminearum#unaffected_pathogenicity	78.846	2.6e-80	237
AR4307g8824	G4MNG8#PHI:807#MGG_06951#318829#Magnaporthe_oryzae#reduced_virulence	78.834	0	748
AR4307g2680	G4N3J5#PHI:5306#MoSKP1#318829#Magnaporthe_oryzae#loss_of_pathogenicity	78.824	6.79e-94	272
AR4307g866	I1RJQ3#PHI:1364#GzC2H024#5518#Fusarium_graminearum#reduced_virulence	78.754	0	978
AR4307g6376	I1RNH4#PHI:5028#gta1#5518#Fusarium_graminearum#unaffected_pathogenicity__reduced_virulence	78.728	0	835
AR4307g1177	H6ULV1#PHI:5450#gdh2#474922#Colletotrichum_gloeosporioides#reduced_virulence__unaffected_pathogenicity	78.711	0	1711
AR4307g2242	I1S7Z8#PHI:1432#GzC2H100#5518#Fusarium_graminearum#unaffected_pathogenicity	78.706	0	558
AR4307g10535	S5FRT9#PHI:3828#AbaA#5518#Fusarium_graminearum#unaffected_pathogenicity	78.685	0	1414
AR4307g2627	I1S282#PHI:1452#GzHSF003#5518#Fusarium_graminearum#unaffected_pathogenicity	78.68	0	875
AR4307g2377	I1RBZ7#PHI:1316#GzBrom001#5518#Fusarium_graminearum#unaffected_pathogenicity	78.632	1.69e-123	377
AR4307g6706	J5K093#PHI:3096#Ktr4#176275#Beauveria_bassiana#reduced_virulence	78.589	0	666
AR4307g7783	I1RRR9#PHI:1457#GzAra005#5518#Fusarium_graminearum#unaffected_pathogenicity	78.571	0	888
AR4307g9046	I1RE06#PHI:1356#GzC2H016#5518#Fusarium_graminearum#unaffected_pathogenicity	78.571	0	736
AR4307g9565	C6ZRH8#PHI:2976#CgOPT1#474922#Colletotrichum_gloeosporioides#reduced_virulence	78.542	0	1205
AR4307g12465	I1S828#PHI:1503#GzHMG035#5518#Fusarium_graminearum#unaffected_pathogenicity	78.448	0	1131
AR4307g3555	I1RZQ6#PHI:7267#PKR#5518#Fusarium_graminearum#reduced_virulence	78.446	0	617
AR4307g11162	G4MXC5#PHI:5190#MoPRX1#318829#Magnaporthe_oryzae#reduced_virulence	78.44	7.06e-129	365
AR4307g5411	I1RAF0#PHI:1343#GzC2H003#5518#Fusarium_graminearum#reduced_virulence	78.415	0	562
AR4307g11421	Q8TFN6#PHI:1054#CgCHSI#31870#Colletotrichum_graminicola#unaffected_pathogenicity	78.405	0	1471
AR4307g12098	G4N7U4#PHI:6634#MoDnm1#318829#Magnaporthe_oryzae#reduced_virulence	78.378	0	1238
AR4307g12160	O42622#PHI:123__PHI:775__PHI:794__PHI:7227#PTH9_(NTH1)__MGG_09471__nth1#318829#Magnaporthe_oryzae#reduced_virulence	78.367	0	1217
AR4307g10721	I1S042#PHI:1090__PHI:1163__PHI:3893#FGSG_10057__ERB1__FgEBR1#5518#Fusarium_graminearum#reduced_virulence	78.363	0	1685
AR4307g8499	I1S1X8#PHI:2355#AMT4#5518#Fusarium_graminearum#reduced_virulence	78.306	0	1244
AR4307g4852	Q4WGR1#PHI:2541#OLE1#746128#Aspergillus_fumigatus#lethal	78.281	0	741
AR4307g9973	J5JFS1#PHI:9046#BbATG7_(BBA_08545)#176275#Beauveria_bassiana#reduced_virulence	78.273	0	1120
AR4307g1722	G4NC97#PHI:3976#MoIlv6#318829#Magnaporthe_oryzae#loss_of_pathogenicity	78.233	2.98e-169	475
AR4307g864	G4MMK2#PHI:3975#MoIlv2#318829#Magnaporthe_oryzae#loss_of_pathogenicity	78.229	0	1094
AR4307g11257	I1RFM2#PHI:3035#FgERG3A#5518#Fusarium_graminearum#reduced_virulence	78.223	0	568
AR4307g424	G4MRH1#PHI:7112#MoERR1#318829#Magnaporthe_oryzae#reduced_virulence	78.14	4.02e-125	355
AR4307g10644	I1RME6#PHI:1274#FGSG_05135#5518#Fusarium_graminearum#unaffected_pathogenicity	78.121	0	2582
AR4307g10731	I1RCI0#PHI:1454#GzAra002#5518#Fusarium_graminearum#unaffected_pathogenicity	78.12	0	1075
AR4307g6362	E9ETZ6#PHI:7251#Mrtdc#568076#Metarhizium_robertsii#reduced_virulence	78.084	0	1238
AR4307g8429	I1S245#PHI:1659#GzCCCH003#5518#Fusarium_graminearum#unaffected_pathogenicity	78.07	5.77e-180	505
AR4307g9819	I1RWF1#PHI:1403#GzC2H066#5518#Fusarium_graminearum#reduced_virulence	78.06	0	608
AR4307g2150	G4MVC4#PHI:5082#MoAcat1#318829#Magnaporthe_oryzae#reduced_virulence	77.99	0	683
AR4307g11925	I1RA39#PHI:1205#(Sc_CDC15)#5518#Fusarium_graminearum#reduced_virulence	77.962	0	1274
AR4307g11448	I1S0R5#PHI:5765__PHI:9049#ScOrtholog_NEM1__FgNem1_(FGSG_10302)#5518#Fusarium_graminearum#reduced_virulence	77.912	0	742
AR4307g1224	I1RK33#PHI:1683#GzRad001#5518#Fusarium_graminearum#lethal	77.859	0	1019
AR4307g2000	I1RSG1#PHI:1916#GzZC231#5518#Fusarium_graminearum#unaffected_pathogenicity	77.838	0	867
AR4307g1834	I1S2I3#PHI:1695#GzZC010#5518#Fusarium_graminearum#unaffected_pathogenicity	77.817	0	884
AR4307g7631	X0I5S4#PHI:6530#gas1#5507#Fusarium_oxysporum#reduced_virulence	77.732	0	806
AR4307g7912	G4N178#PHI:2153__PHI:2356#MoHyr1__MoHYR1#318829#Magnaporthe_oryzae#reduced_virulence	77.711	1.77e-98	284
AR4307g1523	G8AA67#PHI:2476#CcpelA#27358#Colletotrichum_coccodes#reduced_virulence__increased_virulence_(hypervirulence)	77.703	3.98e-166	468
AR4307g3569	I1RZR8#PHI:1752#GzZC067#5518#Fusarium_graminearum#unaffected_pathogenicity	77.68	0	1408
AR4307g6535	I1SA65#PHI:1440__PHI:5574#GzNot002__FgNOT3#5518#Fusarium_graminearum#reduced_virulence	77.667	0	825
AR4307g7018	I1RG87#PHI:1358#GzC2H018#5518#Fusarium_graminearum#unaffected_pathogenicity	77.622	0	1743
AR4307g10946	I1RXT3#PHI:7672#FgLetm1#5518#Fusarium_graminearum#reduced_virulence	77.558	0	819
AR4307g11908	G4MR53#PHI:7188#MoCAPB#318829#Magnaporthe_oryzae#reduced_virulence	77.544	2.13e-154	435
AR4307g2109	I1RMD1#PHI:1958#GzZC273#5518#Fusarium_graminearum#unaffected_pathogenicity	77.513	0	1520
AR4307g10523	G4N9W2#PHI:6607#ARRDC1#318829#Magnaporthe_oryzae#reduced_virulence	77.5	0	662
AR4307g9404	I1ZIP0#PHI:6208#BbCyp8#176275#Beauveria_bassiana#unaffected_pathogenicity	77.491	0	921
AR4307g739	Q9C1K0#PHI:224#PEP2#140110#Nectria_haematococca#reduced_virulence	77.465	1.96e-78	233
AR4307g2049	Q6QIY0#PHI:2382#Upa2#5270#Ustilago_maydis#unaffected_pathogenicity	77.391	0	556
AR4307g12486	I1RRW0#PHI:8743#FgPEX4_(FGSG_06857)#5518#Fusarium_graminearum#reduced_virulence	77.381	2.8e-98	284
AR4307g3575	I1RZS5#PHI:2396#GzSYN2#5518#Fusarium_graminearum#reduced_virulence	77.333	1.16e-168	474
AR4307g4201	I1S097#PHI:4660#Chs3b#5518#Fusarium_graminearum#lethal__reduced_virulence	77.327	0	1419
AR4307g3534	I1RFW6#PHI:1463#GzCCAAT003#5518#Fusarium_graminearum#unaffected_pathogenicity	77.305	7.74e-148	418
AR4307g1818	I1S2I6#PHI:1826#GzZC141#5518#Fusarium_graminearum#unaffected_pathogenicity	77.252	0	712
AR4307g5870	I1RD66#PHI:444__PHI:1292__PHI:1320#ZIF1#5518#Fusarium_graminearum#reduced_virulence	77.233	0	751
AR4307g11288	J4W023#PHI:7181#cypB#176275#Beauveria_bassiana#reduced_virulence	77.228	6.57e-113	325
AR4307g11710	I1RX74#PHI:1771#GzZC086#5518#Fusarium_graminearum#unaffected_pathogenicity	77.197	0	594
AR4307g9706	W7LLK3#PHI:7143#FvCYP1#117187#Fusarium_verticillioides#reduced_virulence	77.193	3.7e-127	361
AR4307g7272	I1RWP3#PHI:6198#SOD1#5518#Fusarium_graminearum#reduced_virulence	77.07	4.13e-83	244
AR4307g2937	A0A0D2XEI7#PHI:9050#FolVam7_(FOXG_02319)#5507#Fusarium_oxysporum#reduced_virulence	77.008	0	547
AR4307g3369	I1RJD6#PHI:2408#FgMT1#5518#Fusarium_graminearum#unaffected_pathogenicity	76.986	0	815
AR4307g6292	W7LT88#PHI:2463#RGSC1#117187#Fusarium_verticillioides#unaffected_pathogenicity	76.948	0	1814
AR4307g2448	I1RBU0#PHI:1632#GzWing004#5518#Fusarium_graminearum#unaffected_pathogenicity	76.936	0	936
AR4307g2810	Q58Z64#PHI:423#VAD1#5207#Cryptococcus_neoformans#reduced_virulence	76.923	0	659
AR4307g4832	I1RQ67#PHI:1255#FGSG_06206#5518#Fusarium_graminearum#unaffected_pathogenicity	76.903	0	1149
AR4307g7557	I1RMG9#PHI:1011#FET3#5518#Fusarium_graminearum#unaffected_pathogenicity	76.886	0	1003
AR4307g5546	I1S8Y9#PHI:1182#(Sc_Mec1)#5518#Fusarium_graminearum#reduced_virulence	76.876	0	2866
AR4307g2354	I1RC15#PHI:1633#GzWing005#5518#Fusarium_graminearum#unaffected_pathogenicity	76.786	0	539
AR4307g7259	Q5A5Q8#PHI:6076#RPS41#5476#Candida_albicans#reduced_virulence	76.744	4.36e-150	422
AR4307g11500	I1RMR8#PHI:1516#GzHOMEL012#5518#Fusarium_graminearum#lethal	76.733	0	554
AR4307g10365	G4N745#PHI:5083#MoAcat2#318829#Magnaporthe_oryzae#reduced_virulence	76.692	0	595
AR4307g10195	W7MGE8#PHI:8037#Fvlds1#117187#Fusarium_verticillioides#reduced_virulence	76.675	0	1896
AR4307g9638	A0A098DK45#PHI:7123#Fgvps39#5518#Fusarium_graminearum#reduced_virulence	76.647	0	1553
AR4307g9766	W7MUL2#PHI:7142#FvStp1#117187#Fusarium_verticillioides#reduced_virulence	76.614	0	1521
AR4307g6671	I1RT91#PHI:1388#GzC2H051#5518#Fusarium_graminearum#unaffected_pathogenicity	76.596	0	510
AR4307g4872	A0A0E0SEE4#PHI:6259#DOHH#5518#Fusarium_graminearum#reduced_virulence__unaffected_pathogenicity	76.558	0	528
AR4307g7156	I1RSV8#PHI:1519#GzHOMEL018#5518#Fusarium_graminearum#unaffected_pathogenicity	76.534	0	775
AR4307g12863	I1RA31#PHI:1461#GzCCAAT001#5518#Fusarium_graminearum#unaffected_pathogenicity	76.508	1.16e-148	422
AR4307g5123	E9EMQ0#PHI:3328#MrKu70#568076#Metarhizium_robertsii#unaffected_pathogenicity	76.471	0	1018
AR4307g8552	I1RP15#PHI:1252#FGSG_05764#5518#Fusarium_graminearum#unaffected_pathogenicity	76.464	0	1156
AR4307g10368	I1RYF6#PHI:1597#GzOB037#5518#Fusarium_graminearum#unaffected_pathogenicity	76.448	0	2330
AR4307g11914	I1RC35#PHI:1219#FGSG_01137#5518#Fusarium_graminearum#lethal	76.258	0	1294
AR4307g2595	A7F6V9#PHI:2911#Ss-pth2#5180#Sclerotinia_sclerotiorum#reduced_virulence	76.23	0	998
AR4307g12807	J5K1X2#PHI:7036#Pmt4#176275#Beauveria_bassiana#increased_virulence_(hypervirulence)__reduced_virulence	76.166	0	1228
AR4307g3065	G4NFW7#PHI:8928#MoSCAD2_(MGG_08690)#318829#Magnaporthe_oryzae#loss_of_pathogenicity	76.159	0	704
AR4307g8256	I1RW22#PHI:1439#GzNot001#5518#Fusarium_graminearum#lethal	76.132	0	3081
AR4307g8829	Q4IA62#PHI:1674#GzDHHC002#5518#Fusarium_graminearum#unaffected_pathogenicity	76.13	0	823
AR4307g10754	I1RCF7#PHI:1220#FGSG_01271#5518#Fusarium_graminearum#lethal	76.08	0	1501
AR4307g9917	I1S077#PHI:1210#FGSG_10095#5518#Fusarium_graminearum#reduced_virulence	76.076	0	2002
AR4307g10885	I1RS32#PHI:1180#(Sc_Sat4)#5518#Fusarium_graminearum#reduced_virulence	76.037	2.34e-116	360
AR4307g2785	I1S231#PHI:1785#GzZC100#5518#Fusarium_graminearum#unaffected_pathogenicity	76.031	0	815
AR4307g12225	I1RQL1#PHI:1451#GzGH#5518#Fusarium_graminearum#unaffected_pathogenicity	76.03	0	1202
AR4307g10733	I1RCH8#PHI:1921#GzZC236#5518#Fusarium_graminearum#reduced_virulence	76.027	0	1379
AR4307g8828	I1RPD3#PHI:6719#FgPLC1#5518#Fusarium_graminearum#reduced_virulence	75.97	0	1660
AR4307g8968	I1RLD6#PHI:5840#Fgsg04731#5518#Fusarium_graminearum#unaffected_pathogenicity	75.946	0	602
AR4307g6411	N4V0R3#PHI:3278#CoIra1#5465#Colletotrichum_orbiculare#reduced_virulence	75.937	0	2162
AR4307g9735	I1RSL0#PHI:1915#GzZC230#5518#Fusarium_graminearum#reduced_virulence	75.932	0	917
AR4307g2804	I1S216#PHI:1605#GzOB046#5518#Fusarium_graminearum#unaffected_pathogenicity	75.893	0	882
AR4307g8953	A0A0E0S648#PHI:5780#Fgsg04051#5518#Fusarium_graminearum#unaffected_pathogenicity	75.873	0	506
AR4307g2130	I1RQ34#PHI:1377#GzC2H040#5518#Fusarium_graminearum#unaffected_pathogenicity	75.866	0	1422
AR4307g9981	I1S0J3#PHI:1526#GzHOMEL036#5518#Fusarium_graminearum#unaffected_pathogenicity	75.835	0	1552
AR4307g3815	I1RZZ3#PHI:2728#FgERG4#5518#Fusarium_graminearum#reduced_virulence	75.817	0	915
AR4307g2280	G4MTG9#PHI:8734#MoLeu1_(MGG_01553)#318829#Magnaporthe_oryzae#loss_of_pathogenicity	75.758	3.91e-12	57.8
AR4307g7674	I1RPU1#PHI:1297#GzAT001#5518#Fusarium_graminearum#reduced_virulence	75.712	0	906
AR4307g513	G4MQA4#PHI:5647#FZC50#318829#Magnaporthe_oryzae#unaffected_pathogenicity	75.676	1.53e-12	68.2
AR4307g6416	I1S1V3#PHI:1238#FGSG_10725#5518#Fusarium_graminearum#lethal	75.643	0	1209
AR4307g9575	I6PDX4#PHI:7596#MakatG1#92637#Metarhizium_acridum#reduced_virulence__unaffected_pathogenicity	75.639	0	1160
AR4307g5849	G4MTN1#PHI:6348__PHI:8233#MoPmt2__MoPmt2_(MGG_07190)#318829#Magnaporthe_oryzae#reduced_virulence	75.57	0	1193
AR4307g2248	I1RST1#PHI:1491#GzHMG023#5518#Fusarium_graminearum#lethal	75.563	0	1162
AR4307g6728	I1S0X7#PHI:1419#GzC2H086#5518#Fusarium_graminearum#unaffected_pathogenicity	75.549	1.26e-158	448
AR4307g12332	Q00845#PHI:180#PELD#140110#Nectria_haematococca#reduced_virulence	75.536	2.06e-131	372
AR4307g10998	I1RFQ3#PHI:1543#GzMyb007#5518#Fusarium_graminearum#unaffected_pathogenicity	75.532	8.5e-135	391
AR4307g7669	G2XIG8#PHI:7173#HiC-15#27337#Verticillium_dahliae#reduced_virulence	75.526	0	873
AR4307g73	Q96VZ3#PHI:181#PGX1#5507#Fusarium_oxysporum#unaffected_pathogenicity	75.524	0	670
AR4307g5416	I1RAE5#PHI:1208__PHI:3131#(Sc_Sch9)__FgSCH9#5518#Fusarium_graminearum#reduced_virulence	75.47	0	1277
AR4307g3612	F8U971#PHI:6157#bcdh#40559#Botrytis_cinerea#unaffected_pathogenicity	75.457	0	635
AR4307g12588	Q0V515#PHI:3914#Sdh1#13684#Parastagonospora_nodorum#reduced_virulence	75.456	0	761
AR4307g5536	I1RWL6#PHI:1190#(Sc_Pbs2)#5518#Fusarium_graminearum#reduced_virulence	75.449	0	1011
AR4307g4876	I1S9V9#PHI:1655#GzWing028#5518#Fusarium_graminearum#unaffected_pathogenicity	75.443	0	2843
AR4307g3564	I1RZR4#PHI:8924#FgPLD1_(FGSG_09917)#5518#Fusarium_graminearum#reduced_virulence	75.421	0	2695
AR4307g11501	I1RMR7#PHI:8911#FgVPS36_(FGSG_05263)#5518#Fusarium_graminearum#reduced_virulence	75.42	0	972
AR4307g5517	I1S8Y4#PHI:1338#GzbZIP020#5518#Fusarium_graminearum#unaffected_pathogenicity	75.394	2.48e-157	444
AR4307g5316	I1RAP1#PHI:1988#GzZC303#5518#Fusarium_graminearum#unaffected_pathogenicity	75.338	0	1033
AR4307g10301	I1RS54#PHI:1518#GzHOMEL016#5518#Fusarium_graminearum#unaffected_pathogenicity	75.309	8.96e-85	264
AR4307g6091	W7MS09#PHI:3385#FVEG_12529#117187#Fusarium_verticillioides#unaffected_pathogenicity	75.289	0	659
AR4307g11358	I1RQN6#PHI:1974#GzZC289#5518#Fusarium_graminearum#unaffected_pathogenicity	75.251	0	966
AR4307g8432	I1S248#PHI:8914#FgVPS24_(FGSG_10832)#5518#Fusarium_graminearum#lethal	75.217	2.19e-107	311
AR4307g2645	I1RCP1#PHI:1080#Cch1#5518#Fusarium_graminearum#unaffected_pathogenicity	75.165	0	3184
AR4307g2596	I1RE49#PHI:7111#FgCAP1#5518#Fusarium_graminearum#reduced_virulence	75.139	0	773
AR4307g6685	G4MNE6#PHI:2109#CNB#318829#Magnaporthe_oryzae#reduced_virulence__loss_of_pathogenicity	75.113	1.33e-106	306
AR4307g3250	A0A0C4DHY4#PHI:4880#pgx6#5507#Fusarium_oxysporum#unaffected_pathogenicity__reduced_virulence	75.108	0	757
AR4307g2194	G4MSK7#PHI:7149#Moglo3#318829#Magnaporthe_oryzae#reduced_virulence	75.102	0	687
AR4307g9810	G4NB53#PHI:5472#MoDeam#318829#Magnaporthe_oryzae#reduced_virulence	75.068	0	561
AR4307g4711	Q4WGR1#PHI:2541#OLE1#746128#Aspergillus_fumigatus#lethal	75.057	0	721
AR4307g3629	E9EU30#PHI:5433#Mero-Ste11#568076#Metarhizium_robertsii#unaffected_pathogenicity	75.054	0	1390
AR4307g7795	I1RRQ8#PHI:1211#(Sc_Ctk1)#5518#Fusarium_graminearum#reduced_virulence	75.051	0	730
AR4307g4858	N4VBG2#PHI:6970#copag1#5465#Colletotrichum_orbiculare#reduced_virulence	75.048	0	3832
AR4307g12121	I1RCM1#PHI:1353#GzC2H013#5518#Fusarium_graminearum#reduced_virulence	75.034	0	1019
AR4307g5525	I1RWL9#PHI:1079#Pls1#5518#Fusarium_graminearum#unaffected_pathogenicity	75	1.03e-129	367
AR4307g2174	E9F2M8#PHI:7757#Mrpem_(MAA_06426)#568076#Metarhizium_robertsii#unaffected_pathogenicity	74.974	0	1519
AR4307g5102	I1RE91#PHI:8925#FgPLD2_(FGSG_01973)#5518#Fusarium_graminearum#unaffected_pathogenicity	74.969	0	1284
AR4307g5124	Q4WUA3#PHI:2532#HEM15#746128#Aspergillus_fumigatus#lethal	74.939	0	632
AR4307g1909	I1S2C5#PHI:1783#GzZC098#5518#Fusarium_graminearum#unaffected_pathogenicity	74.923	0	979
AR4307g11009	I1RFP4#PHI:1441#GzDDT#5518#Fusarium_graminearum#reduced_virulence	74.874	0	1427
AR4307g9167	J5K8H0#PHI:4990#ras3#176275#Beauveria_bassiana#reduced_virulence	74.815	2.3e-138	394
AR4307g12594	Q0U2A0#PHI:2255#Abd1#13684#Parastagonospora_nodorum#unaffected_pathogenicity	74.795	0	572
AR4307g8523	I1S7I6#PHI:1429#GzC2H097#5518#Fusarium_graminearum#unaffected_pathogenicity	74.752	0	1018
AR4307g10306	I1RS57#PHI:1253#FGSG_06970#5518#Fusarium_graminearum#unaffected_pathogenicity	74.712	0	1761
AR4307g6244	I1RYQ5#PHI:1246#FGSG_09513#5518#Fusarium_graminearum#unaffected_pathogenicity	74.698	0	1416
AR4307g111	I1RY79#PHI:1943#GzZC258#5518#Fusarium_graminearum#unaffected_pathogenicity	74.664	0	1357
AR4307g9639	A0A098DK45#PHI:7123#Fgvps39#5518#Fusarium_graminearum#reduced_virulence	74.652	0	1338
AR4307g10547	I1RBF6#PHI:1565#GzOB005#5518#Fusarium_graminearum#unaffected_pathogenicity	74.65	0	881
AR4307g352	I1RQS8#PHI:1379#GzC2H042#5518#Fusarium_graminearum#reduced_virulence	74.638	0	811
AR4307g7181	G4MV96#PHI:3823#MET13#318829#Magnaporthe_oryzae#loss_of_pathogenicity	74.629	0	999
AR4307g11860	I1RWW4#PHI:1331__PHI:3111__PHI:4023#GzbZIP013__FgAP1__Fgap1#5518#Fusarium_graminearum#unaffected_pathogenicity	74.619	0	790
AR4307g9242	I1RXD6#PHI:1535#GzMADS002#5518#Fusarium_graminearum#unaffected_pathogenicity	74.603	0	692
AR4307g5315	I1RAP2#PHI:1987#GzZC302#5518#Fusarium_graminearum#reduced_virulence	74.553	0	1385
AR4307g7075	O60038#PHI:1034#Cpcat1#5111#Claviceps_purpurea#unaffected_pathogenicity	74.545	0	1114
AR4307g7778	I1RRS3#PHI:1816#GzZC131#5518#Fusarium_graminearum#unaffected_pathogenicity	74.538	0	1301
AR4307g3454	F5B5Y4#PHI:6206#BbCypC#176275#Beauveria_bassiana#unaffected_pathogenicity	74.534	2.13e-92	268
AR4307g5738	J5JYY9#PHI:4917#BbbqrA#176275#Beauveria_bassiana#reduced_virulence__increased_virulence_(hypervirulence)__unaffected_pathogenicity	74.49	8.9e-103	299
AR4307g9825	I1RW42#PHI:5783#Fgsg08496#5518#Fusarium_graminearum#unaffected_pathogenicity	74.455	4.53e-173	485
AR4307g11811	Q51LD2#PHI:2071#Moatg3#318829#Magnaporthe_oryzae#loss_of_pathogenicity	74.438	0	515
AR4307g6037	I1RGC9#PHI:1359#GzC2H019#5518#Fusarium_graminearum#unaffected_pathogenicity	74.342	1.33e-60	186
AR4307g7306	I1RW84#PHI:6183#FgVps27#5518#Fusarium_graminearum#reduced_virulence	74.308	0	1050
AR4307g3781	I1RNY7#PHI:1181#(Sc_Kic1)#5518#Fusarium_graminearum#reduced_virulence	74.306	0	1004
AR4307g9121	J4KQD8#PHI:6875#BbVmaH#176275#Beauveria_bassiana#reduced_virulence	74.257	0	755
AR4307g6954	Q9C1E9#PHI:226#PEX6#5462#Colletotrichum_lagenaria#loss_of_pathogenicity	74.24	0	1976
AR4307g6246	J4KMX0#PHI:7152#pmcB#176275#Beauveria_bassiana#reduced_virulence	74.179	0	1892
AR4307g6643	H8ZZ79#PHI:2710#mepB#474922#Colletotrichum_gloeosporioides#reduced_virulence	74.055	0	616
AR4307g8703	I1RJX5#PHI:5870#Fgsg04159#5518#Fusarium_graminearum#unaffected_pathogenicity	73.995	0	558
AR4307g9764	I1RSN1#PHI:1610#GzP53L003#5518#Fusarium_graminearum#unaffected_pathogenicity	73.973	0	960
AR4307g2616	J4WK53#PHI:8672#phr2_(EJP70165)#176275#Beauveria_bassiana#unaffected_pathogenicity	73.968	0	957
AR4307g7048	J5JEX5#PHI:3097#Kre2/Mnt1#176275#Beauveria_bassiana#reduced_virulence	73.93	0	766
AR4307g10552	I1RBE8#PHI:9047#FgPah1_(FGSG_00866)#5518#Fusarium_graminearum#reduced_virulence	73.924	0	1116
AR4307g6287	I1RY51#PHI:1333#GzbZIP015#5518#Fusarium_graminearum#unaffected_pathogenicity	73.913	5.79e-108	322
AR4307g6644	I1REK5#PHI:733#FBP1#5518#Fusarium_graminearum#reduced_virulence	73.895	0	1045
AR4307g11975	I1RC64#PHI:1554#GzMyb018#5518#Fusarium_graminearum#unaffected_pathogenicity	73.889	0	1106
AR4307g10773	I1RFY9#PHI:1357#GzC2H017#5518#Fusarium_graminearum#unaffected_pathogenicity	73.868	0	1233
AR4307g6115	A4QUT2#PHI:2183#CPXB#318829#Magnaporthe_oryzae#unaffected_pathogenicity	73.825	0	1181
AR4307g11005	I1RFP7#PHI:1935#GzZC250#5518#Fusarium_graminearum#unaffected_pathogenicity	73.787	0	1417
AR4307g11466	I1RFN8#PHI:1166#ATG15#5518#Fusarium_graminearum#reduced_virulence	73.76	0	883
AR4307g8797	I1RPF6#PHI:1878#GzZC193#5518#Fusarium_graminearum#unaffected_pathogenicity	73.739	0	1212
AR4307g6602	Q4X099#PHI:2638#Ilv3A#746128#Aspergillus_fumigatus#reduced_virulence	73.737	0	871
AR4307g10037	I1RBM2#PHI:2395#GzSYN1#5518#Fusarium_graminearum#reduced_virulence	73.727	3.04e-169	480
AR4307g12712	I1S028#PHI:3374#FgSln1#5518#Fusarium_graminearum#reduced_virulence	73.689	0	1622
AR4307g4095	Q4WLT4#PHI:2533#FKS1#746128#Aspergillus_fumigatus#lethal	73.671	0	2914
AR4307g7932	A0A0A2JZB1#PHI:8722__PHI:8724#PeCat__PeSat#27334#Penicillium_expansum#unaffected_pathogenicity__reduced_virulence	73.647	0	874
AR4307g1264	Q876Z6#PHI:375#REN1#5507#Fusarium_oxysporum#unaffected_pathogenicity	73.607	0	1073
AR4307g6938	O42772#PHI:822#Ip#1047171#Zymoseptoria_tritici#chemistry_target:_resistance_to_chemical	73.606	1.71e-150	425
AR4307g10352	Q524W4#PHI:2084#Moatg18#318829#Magnaporthe_oryzae#reduced_virulence	73.585	0	680
AR4307g12770	I1RYY1#PHI:1757#GzZC072#5518#Fusarium_graminearum#unaffected_pathogenicity	73.517	0	1074
AR4307g7003	I6YDU0#PHI:2907#Cyp51A#5518#Fusarium_graminearum#unaffected_pathogenicity__reduced_virulence	73.506	0	788
AR4307g8255	G4MRZ0#PHI:773__PHI:791__PHI:2141#MGG_11899__CDC15#318829#Magnaporthe_oryzae#reduced_virulence__loss_of_pathogenicity	73.394	0	653
AR4307g11334	A0A0D2XVZ5#PHI:5236#Dnj1#5507#Fusarium_oxysporum#reduced_virulence	73.384	0	794
AR4307g11912	I1RC37#PHI:1302#GzbHLH003#5518#Fusarium_graminearum#unaffected_pathogenicity	73.366	0	579
AR4307g10250	I1RCJ0#PHI:1304#GzbHLH005#5518#Fusarium_graminearum#reduced_virulence	73.309	0	741
AR4307g5894	I1RD84#PHI:1355#GzC2H015#5518#Fusarium_graminearum#unaffected_pathogenicity	73.297	0	525
AR4307g974	Q96WW9#PHI:258#GPABC1#5128#Fusarium_sambucinum#reduced_virulence	73.27	0	2303
AR4307g5952	Q9P304#PHI:199#AOX1#5499#Passalora_fulva#reduced_virulence	73.233	0	1038
AR4307g8994	B0XTA5#PHI:2293#cycA#746128#Aspergillus_fumigatus#reduced_virulence	73.196	3.02e-49	159
AR4307g10101	I1RAW2#PHI:1345#GzC2H005#5518#Fusarium_graminearum#unaffected_pathogenicity	73.171	6.38e-101	296
AR4307g2815	Q8NJS2#PHI:697#ugt51E1#5022#Leptosphaeria_maculans#unaffected_pathogenicity	73.158	0	591
AR4307g1650	I1RYC3#PHI:1409#GzC2H075#5518#Fusarium_graminearum#unaffected_pathogenicity	73.137	0	1493
AR4307g10190	I1RA24#PHI:1342#GzC2H002#5518#Fusarium_graminearum#unaffected_pathogenicity	73.118	5.33e-44	147
AR4307g9173	I1RPG1#PHI:1326#GzbZIP008#5518#Fusarium_graminearum#unaffected_pathogenicity	73.089	0	752
AR4307g7839	Q5AJB1#PHI:3321#Tfp1#5476#Candida_albicans#loss_of_pathogenicity	73.07	0	898
AR4307g5344	I1RAL4#PHI:1300#GzbHLH001#5518#Fusarium_graminearum#unaffected_pathogenicity	73.059	0	897
AR4307g996	I1RHJ0#PHI:1907#GzZC222#5518#Fusarium_graminearum#unaffected_pathogenicity	73.026	0	1132
AR4307g7017	I1RG88#PHI:7649#FgPR-IL-2#5518#Fusarium_graminearum#unaffected_pathogenicity	73.006	4.91e-86	260
AR4307g10154	I1RA01#PHI:1537#MYT1#5518#Fusarium_graminearum#unaffected_pathogenicity	73	9.21e-140	405
AR4307g9180	I1RP98#PHI:1621#GzRUM1#5518#Fusarium_graminearum#unaffected_pathogenicity	72.998	0	2547
AR4307g10176	I1RA15#PHI:446__PHI:2348#TBL1__FTL1_(TBL1)#5518#Fusarium_graminearum#reduced_virulence	72.994	0	877
AR4307g219	I1S4P4#PHI:1217#FGSG_00792#5518#Fusarium_graminearum#reduced_virulence	72.857	0	1514
AR4307g11598	E9EJG5#PHI:7756#Mrpct_(MAA_00035)#568076#Metarhizium_robertsii#reduced_virulence	72.848	0	616
AR4307g12470	I1RRX1#PHI:1382#GzC2H045#5518#Fusarium_graminearum#reduced_virulence	72.842	0	699
AR4307g908	W7MCU7#PHI:7597#FvDim5#117187#Fusarium_verticillioides#reduced_virulence	72.807	6.89e-177	496
AR4307g2102	I1RMC1#PHI:1678#GzGRF#5518#Fusarium_graminearum#unaffected_pathogenicity	72.8	0	555
AR4307g9024	I1S0C1#PHI:1668#GzCCHC008#5518#Fusarium_graminearum#unaffected_pathogenicity	72.796	0	624
AR4307g4930	I1RZ94#PHI:1649#GzWing021#5518#Fusarium_graminearum#unaffected_pathogenicity	72.727	2.38e-127	365
AR4307g5138	I1RMV4#PHI:1464__PHI:8923#GzCCAAT004__FgHLTF1_(FGSG_05304)#5518#Fusarium_graminearum#reduced_virulence	72.727	9.17e-95	275
AR4307g6735	I1S0W9#PHI:1418#GzC2H085#5518#Fusarium_graminearum#lethal	72.7	1.41e-165	467
AR4307g7081	G4N7K8#PHI:9032#Mocrn1_(MGG_06389)#318829#Magnaporthe_oryzae#reduced_virulence__unaffected_pathogenicity	72.684	0	907
AR4307g2926	I1RU06#PHI:6124__PHI:5750#FGSG_07678__ScOrtholog_GIC1#5518#Fusarium_graminearum#reduced_virulence	72.584	0	640
AR4307g10513	Q8J286#PHI:244#CLAP1#290576#Colletotrichum_lindemuthianum#loss_of_pathogenicity	72.526	0	1683
AR4307g5879	I1RD74#PHI:1961#GzZC276#5518#Fusarium_graminearum#unaffected_pathogenicity	72.524	0	1198
AR4307g3664	Q4IB89#PHI:1224#FGSG_05519#5518#Fusarium_graminearum#lethal	72.493	0	4345
AR4307g6436	Q4X0J6#PHI:2517#TRPS#746128#Aspergillus_fumigatus#lethal	72.493	0	1101
AR4307g9092	I1RDX3#PHI:1254#FGSG_01842#5518#Fusarium_graminearum#unaffected_pathogenicity	72.483	0	1005
AR4307g5711	Q4HY90#PHI:1525#GzHOMEL035#5518#Fusarium_graminearum#unaffected_pathogenicity	72.468	0	822
AR4307g12467	I1RRX4#PHI:1291#TOP1#5518#Fusarium_graminearum#reduced_virulence	72.447	0	1293
AR4307g6401	I1RNJ6#PHI:5784#Fgsg05579#5518#Fusarium_graminearum#unaffected_pathogenicity	72.423	0	511
AR4307g10078	G4NCG1#PHI:3234#MoLYS20#318829#Magnaporthe_oryzae#reduced_virulence	72.414	4.11e-25	97.4
AR4307g4283	G4NGP6#PHI:2097#Neo1#318829#Magnaporthe_oryzae#loss_of_pathogenicity	72.401	0	1885
AR4307g6800	I1RQT9#PHI:5873#Fgsg06439#5518#Fusarium_graminearum#unaffected_pathogenicity	72.394	0	525
AR4307g12105	Q6B957#PHI:490#FRP1#5507#Fusarium_oxysporum#loss_of_pathogenicity	72.34	0	809
AR4307g7568	I1RMI1#PHI:1325#GzbZIP007#5518#Fusarium_graminearum#reduced_virulence	72.302	2.77e-131	376
AR4307g1499	G4NJD1#PHI:2171#Peroxisomal_copper_amine_oxidase#318829#Magnaporthe_oryzae#reduced_virulence	72.301	0	1085
AR4307g12929	I1RRG4#PHI:1380#GzC2H043#5518#Fusarium_graminearum#unaffected_pathogenicity	72.277	0	729
AR4307g10282	I1RS43#PHI:1585#GzOB025#5518#Fusarium_graminearum#unaffected_pathogenicity	72.251	0	594
AR4307g6050	I1RGE3#PHI:1360#GzC2H020#5518#Fusarium_graminearum#unaffected_pathogenicity	72.222	0	796
AR4307g12344	I1RN13#PHI:1010#SID1#5518#Fusarium_graminearum#reduced_virulence	72.172	0	827
AR4307g2805	I1S215#PHI:2400#Fgp2#5518#Fusarium_graminearum#unaffected_pathogenicity	72.072	0	575
AR4307g4735	A0A1C3YMM6#PHI:5794#Fgsg12490#5518#Fusarium_graminearum#unaffected_pathogenicity	72.048	0	583
AR4307g3520	G5EHZ3#PHI:9055#MoIVD_(MGG_02540)#318829#Magnaporthe_oryzae#reduced_virulence	72.032	0	557
AR4307g7854	A4R5F6#PHI:5234#MoARG7#318829#Magnaporthe_oryzae#reduced_virulence	72	0	658
AR4307g6412	I1S1U7#PHI:2352__PHI:2354#AMT2#5518#Fusarium_graminearum#unaffected_pathogenicity__reduced_virulence	71.97	0	783
AR4307g10684	G2XE04#PHI:7873#VdSec22#27337#Verticillium_dahliae#reduced_virulence	71.963	3.9e-110	333
AR4307g5642	G4MXG4#PHI:2095#Calcium-transporting_ATPase_3#318829#Magnaporthe_oryzae#reduced_virulence	71.94	0	1556
AR4307g7947	A0JC80#PHI:3623#RacA#35717#Epichloe_festucae#increased_virulence_(hypervirulence)	71.901	2.27e-117	336
AR4307g2101	G4MSX7#PHI:772__PHI:797#MGG_01481#318829#Magnaporthe_oryzae#loss_of_pathogenicity__reduced_virulence	71.733	0	549
AR4307g4296	I1RG68#PHI:1544#GzMyb008#5518#Fusarium_graminearum#unaffected_pathogenicity	71.707	4.7e-64	214
AR4307g3410	Q4WP25#PHI:2542#ERG12#746128#Aspergillus_fumigatus#lethal	71.648	0	672
AR4307g11720	J5JB66#PHI:7035#Pmt1#176275#Beauveria_bassiana#reduced_virulence	71.637	0	1422
AR4307g3919	Q874F3#PHI:391#ABC2#318829#Magnaporthe_oryzae#unaffected_pathogenicity	71.599	0	2144
AR4307g12130	I1RX64#PHI:1407#GzC2H071#5518#Fusarium_graminearum#lethal	71.596	0	988
AR4307g8996	I1S297#PHI:8912#FgVPS20_(FGSG_10883)#5518#Fusarium_graminearum#reduced_virulence	71.569	5.45e-92	269
AR4307g2666	I1RCM6#PHI:1273#FGSG_01347#5518#Fusarium_graminearum#unaffected_pathogenicity	71.566	0	1764
AR4307g9812	G4NB58#PHI:5471#MoDac#318829#Magnaporthe_oryzae#reduced_virulence	71.549	0	536
AR4307g10264	J5JIF8#PHI:7153#pmcC#176275#Beauveria_bassiana#reduced_virulence	71.539	0	1642
AR4307g1256	G4N471#PHI:2098#Calcium-transporting_ATPase_3#318829#Magnaporthe_oryzae#loss_of_pathogenicity	71.534	0	1597
AR4307g6209	Q696X2#PHI:414#GOX1#13684#Parastagonospora_nodorum#unaffected_pathogenicity	71.473	4.2e-177	495
AR4307g4853	I1S7R2#PHI:1275#FGSG_12887#5518#Fusarium_graminearum#unaffected_pathogenicity	71.454	0	816
AR4307g671	G2XHI2#PHI:7172#Clp-1#27337#Verticillium_dahliae#reduced_virulence	71.429	0	991
AR4307g9724	G4N1P8#PHI:5440#ABA4#318829#Magnaporthe_oryzae#reduced_virulence	71.429	5.83e-135	383
AR4307g12395	I1RFR7#PHI:1944#GzZC259#5518#Fusarium_graminearum#unaffected_pathogenicity	71.377	0	784
AR4307g6293	G4MVK9#PHI:5017#MoPEX11A#318829#Magnaporthe_oryzae#reduced_virulence	71.368	1.72e-122	350
AR4307g1718	I1RQD8#PHI:1614#GzSART1#5518#Fusarium_graminearum#unaffected_pathogenicity	71.322	0	828
AR4307g1547	I1RYI2#PHI:3373#FgSho1#5518#Fusarium_graminearum#reduced_virulence	71.299	4.41e-164	462
AR4307g4294	Q4WK65#PHI:2639#Ilv3B#746128#Aspergillus_fumigatus#unaffected_pathogenicity__reduced_virulence	71.271	0	789
AR4307g7187	I1RYV4#PHI:1449#GzGATA007#5518#Fusarium_graminearum#unaffected_pathogenicity	71.252	0	731
AR4307g5096	G4MRN1#PHI:7318#noxD#318829#Magnaporthe_oryzae#loss_of_pathogenicity	71.233	2.6e-74	220
AR4307g32	G4MKI0#PHI:2118__PHI:5540#MgSM1__MSP1#318829#Magnaporthe_oryzae#effector_(plant_avirulence_determinant)__increased_virulence_(hypervirulence)	71.223	7.03e-66	198
AR4307g10805	A0MAR2#PHI:2858#FvVE1#117187#Fusarium_verticillioides#loss_of_pathogenicity	71.186	0	699
AR4307g9237	G4NGW8#PHI:3175#MoSnf4#318829#Magnaporthe_oryzae#loss_of_pathogenicity	71.182	1.54e-173	499
AR4307g1235	A9QUB2#PHI:2403#CSN1#169388#Fusarium_solani#increased_virulence_(hypervirulence)__reduced_virulence	71.141	3.77e-155	437
AR4307g7992	Q9UW03#PHI:202__PHI:1160__PHI:2309#BcatrB#40559#Botrytis_cinerea#unaffected_pathogenicity__reduced_virulence__chemistry_target:_sensitivity_to_chemical	71.135	0	2083
AR4307g184	I1RB25#PHI:1473#GzHMG005#5518#Fusarium_graminearum#reduced_virulence	71.123	1.46e-162	461
AR4307g1174	J4UPL6#PHI:5394#mas5#176275#Beauveria_bassiana#loss_of_pathogenicity	71.096	0	553
AR4307g5014	I1RJ45#PHI:6120#FGSG_03846#5518#Fusarium_graminearum#reduced_virulence	71.076	0	641
AR4307g2191	I1RZ82#PHI:1612#GzP53L005#5518#Fusarium_graminearum#unaffected_pathogenicity	71.069	7.78e-142	412
AR4307g12173	I1RLX6#PHI:1192#(Sc_Cak1)#5518#Fusarium_graminearum#reduced_virulence	71.014	1.57e-180	511
AR4307g12340	I1RN15#PHI:1456#GzAra004#5518#Fusarium_graminearum#unaffected_pathogenicity	70.997	0	960
AR4307g5379	J4KLZ9#PHI:7155#pmr1#176275#Beauveria_bassiana#reduced_virulence	70.969	0	2671
AR4307g10475	A0A1C3YMR4#PHI:5866#Fgsg03237#5518#Fusarium_graminearum#unaffected_pathogenicity	70.959	2.4e-179	505
AR4307g10159	I1R9Z6#PHI:1989#GzZC304#5518#Fusarium_graminearum#unaffected_pathogenicity	70.933	0	701
AR4307g11937	I1RA50#PHI:1453#GzAra001#5518#Fusarium_graminearum#lethal	70.912	0	933
AR4307g9363	Q4WKG5#PHI:2530#TUB1#746128#Aspergillus_fumigatus#lethal__loss_of_pathogenicity	70.889	0	664
AR4307g7131	Q1L2E2#PHI:595__PHI:2248#ALS1__Als1#13684#Parastagonospora_nodorum#reduced_virulence__loss_of_pathogenicity	70.847	0	892
AR4307g8171	A0A0J9UIM0#PHI:7685#AreA#5507#Fusarium_oxysporum#increased_virulence_(hypervirulence)	70.816	0	1274
AR4307g1635	I1RP88#PHI:1226#FGSG_05845#5518#Fusarium_graminearum#lethal	70.803	1.77e-61	200
AR4307g5336	I1RAM0#PHI:7125#FgKar9#5518#Fusarium_graminearum#unaffected_pathogenicity	70.791	0	1391
AR4307g3430	I1RJK1#PHI:5776#Fgsg04023#5518#Fusarium_graminearum#unaffected_pathogenicity	70.789	0	561
AR4307g12239	I1RIS2#PHI:5353#Famfs1#282267#Fusarium_asiaticum#reduced_virulence	70.746	0	688
AR4307g2568	A0A0C4DHR8#PHI:7682#nit1#5507#Fusarium_oxysporum#unaffected_pathogenicity	70.718	0	1353
AR4307g8800	I1RPF7#PHI:1704#GzZC019#5518#Fusarium_graminearum#unaffected_pathogenicity	70.718	0	772
AR4307g2947	I1RRB9#PHI:1229#FGSG_06637#5518#Fusarium_graminearum#lethal	70.68	0	677
AR4307g7186	I1RYV5#PHI:1514#GzHOME012#5518#Fusarium_graminearum#unaffected_pathogenicity	70.68	0	1709
AR4307g6627	I1REJ1#PHI:1662#GzCCHC002#5518#Fusarium_graminearum#unaffected_pathogenicity	70.659	0	710
AR4307g6711	G4MZ63#PHI:3824#MET12#318829#Magnaporthe_oryzae#unaffected_pathogenicity__loss_of_pathogenicity	70.647	0	1002
AR4307g2663	I1RCM9#PHI:1354#GzC2H014#5518#Fusarium_graminearum#reduced_virulence	70.636	0	780
AR4307g7853	O42621#PHI:121#PTH3#318829#Magnaporthe_oryzae#loss_of_pathogenicity	70.588	1.94e-114	328
AR4307g4046	I1RUD7#PHI:1811#GzZC126#5518#Fusarium_graminearum#unaffected_pathogenicity	70.588	5.99e-111	340
AR4307g11153	I1RTN5#PHI:1549__PHI:2385#MYT2#5518#Fusarium_graminearum#unaffected_pathogenicity__reduced_virulence	70.554	3.06e-146	418
AR4307g12596	I1RAW4#PHI:7193#FgLaeA#5518#Fusarium_graminearum#reduced_virulence	70.55	7.09e-166	466
AR4307g8847	I1RPI7#PHI:1877#GzZC192#5518#Fusarium_graminearum#unaffected_pathogenicity	70.49	0	1021
AR4307g6614	I1REH9#PHI:1932#GzZC247#5518#Fusarium_graminearum#unaffected_pathogenicity	70.482	0	674
AR4307g7731	Q4I2M7#PHI:1676#GzDHHC004#5518#Fusarium_graminearum#unaffected_pathogenicity	70.458	0	959
AR4307g2125	G4MT58#PHI:5480#MoPyr5#318829#Magnaporthe_oryzae#reduced_virulence	70.404	6.38e-111	320
AR4307g4882	J5JMB3#PHI:6746#Mdj1#176275#Beauveria_bassiana#reduced_virulence	70.336	0	716
AR4307g11987	I1RC70#PHI:1303#GzbHLH004#5518#Fusarium_graminearum#unaffected_pathogenicity	70.319	0	661
AR4307g9551	Q9C4A0#PHI:2817#Aapg1#5599#Alternaria_alternata#unaffected_pathogenicity	70.231	7.81e-161	459
AR4307g9970	I1S0J9#PHI:1185#(Sc_Swe1)#5518#Fusarium_graminearum#reduced_virulence	70.229	0	1390
AR4307g2523	A4QVH4#PHI:5187#MoCCP1#318829#Magnaporthe_oryzae#reduced_virulence	70.219	0	520
AR4307g2565	B5M4A8#PHI:2116__PHI:2301#CHS7#318829#Magnaporthe_oryzae#reduced_virulence	70.219	0	1000
AR4307g3238	I1S3G2#PHI:5817#Fgsg11343#5518#Fusarium_graminearum#unaffected_pathogenicity	70.202	0	549
AR4307g9204	I1RXE8#PHI:1763#GzZC078#5518#Fusarium_graminearum#unaffected_pathogenicity	70.198	0	991
AR4307g7883	I1RPZ1#PHI:1517#GzHOMEL013#5518#Fusarium_graminearum#lethal	70.179	0	1133
AR4307g3824	I1RV65#PHI:1398#GzC2H061#5518#Fusarium_graminearum#unaffected_pathogenicity	70.106	0	944
AR4307g7627	G4MLK2#PHI:8040__PHI:8047#Mouba2__Uba2#318829#Magnaporthe_oryzae#reduced_virulence	70.037	0	770
AR4307g9456	I1RL30#PHI:1094#FGSG_04610#5518#Fusarium_graminearum#unaffected_pathogenicity	70.037	0	790
AR4307g10943	G4N6R6#PHI:7113#MoERR2#318829#Magnaporthe_oryzae#unaffected_pathogenicity	70.032	4.75e-161	457
AR4307g1061	P53376#PHI:823#beta-tubulin#914237#Rhynchosporium_commune#chemistry_target:_resistance_to_chemical	69.96	2.79e-122	358
AR4307g1780	G2WY50#PHI:4909#VdQase#27337#Verticillium_dahliae#reduced_virulence	69.94	6.74e-176	518
AR4307g6047	I1RGD9#PHI:1941#GzZC256#5518#Fusarium_graminearum#unaffected_pathogenicity	69.933	0	1040
AR4307g5101	I1RE92#PHI:1097#FGSG_01974#5518#Fusarium_graminearum#reduced_virulence	69.903	3.49e-107	308
AR4307g4071	I1RUM9#PHI:1396#GzC2H059#5518#Fusarium_graminearum#reduced_virulence	69.85	0	865
AR4307g11945	I1RQI2#PHI:1195#(Sc_Bck1)#5518#Fusarium_graminearum#reduced_virulence	69.842	0	2000
AR4307g167	I1S4Q3#PHI:1756#GzZC071#5518#Fusarium_graminearum#unaffected_pathogenicity	69.828	8.91e-43	165
AR4307g2140	E2GL14#PHI:2334#BcNma#40559#Botrytis_cinerea#reduced_virulence	69.802	0	1463
AR4307g12211	I1RGG4#PHI:1713#GzZC028#5518#Fusarium_graminearum#unaffected_pathogenicity	69.785	0	902
AR4307g9805	I1RVV8#PHI:1312#GzbHLH013#5518#Fusarium_graminearum#unaffected_pathogenicity	69.739	0	1304
AR4307g3740	J9N0G7#PHI:1105#FOXG_08661#5507#Fusarium_oxysporum#unaffected_pathogenicity	69.737	2.88e-77	234
AR4307g11282	I1S3J7#PHI:1424#GzC2H092#5518#Fusarium_graminearum#unaffected_pathogenicity	69.737	4.3e-27	116
AR4307g6900	G4NIU3#PHI:789#MGG_04116#318829#Magnaporthe_oryzae#reduced_virulence	69.686	5.38e-132	436
AR4307g5395	G4MTZ0#PHI:2114#Calnexin#318829#Magnaporthe_oryzae#loss_of_pathogenicity	69.655	0	778
AR4307g3623	I1RNA9#PHI:1508#GzHOME003#5518#Fusarium_graminearum#unaffected_pathogenicity	69.614	0	1360
AR4307g6052	I1RGE1#PHI:4042#spt8#5518#Fusarium_graminearum#reduced_virulence	69.585	0	860
AR4307g3949	G4MRB4#PHI:4491#SHM#318829#Magnaporthe_oryzae#reduced_virulence	69.565	0	709
AR4307g4806	I1RQ92#PHI:1487#GzHMG019#5518#Fusarium_graminearum#unaffected_pathogenicity	69.549	0	1085
AR4307g11468	I1RFC7#PHI:1239#FGSG_02399#5518#Fusarium_graminearum#unaffected_pathogenicity	69.531	1.16e-129	379
AR4307g4088	I1RUP1#PHI:1447#GzGATA005#5518#Fusarium_graminearum#unaffected_pathogenicity	69.519	0	1375
AR4307g10803	I1RCV8#PHI:5786#Fgsg01440#5518#Fusarium_graminearum#unaffected_pathogenicity	69.455	1.46e-131	387
AR4307g64	W7M2E5#PHI:3356#Mads2#117187#Fusarium_verticillioides#unaffected_pathogenicity	69.429	0	683
AR4307g2952	E9F1A7#PHI:6380#mrLPAAT1#568076#Metarhizium_robertsii#reduced_virulence	69.416	9.51e-150	424
AR4307g5993	I1RHB3#PHI:1923#GzZC238#5518#Fusarium_graminearum#unaffected_pathogenicity	69.399	1.22e-79	256
AR4307g3907	F0XP73#PHI:2693#GcABC-G1#226899#Grosmannia_clavigera#reduced_virulence	69.395	0	2145
AR4307g4101	I1RUQ2#PHI:1397#GzC2H060#5518#Fusarium_graminearum#unaffected_pathogenicity	69.388	1.31e-48	153
AR4307g9811	I1RVV2#PHI:1611#GzP53L004#5518#Fusarium_graminearum#unaffected_pathogenicity	69.376	0	738
AR4307g9063	I1RDZ2#PHI:5809#Fgsg01861#5518#Fusarium_graminearum#unaffected_pathogenicity	69.231	0	608
AR4307g1183	I1RJS9#PHI:2326__PHI:2491__PHI:5720#PTC1__FgPTC1__ScOrtholog_PTC1#5518#Fusarium_graminearum#reduced_virulence__unaffected_pathogenicity	69.217	0	692
AR4307g10667	G4ML12#PHI:6739#MoGls2#318829#Magnaporthe_oryzae#reduced_virulence	69.176	0	1395
AR4307g403	I1RDE2#PHI:1960#GzZC275#5518#Fusarium_graminearum#unaffected_pathogenicity	69.153	0	1301
AR4307g4476	I1RIQ3#PHI:1575#GzOB015#5518#Fusarium_graminearum#unaffected_pathogenicity	69.136	7.71e-117	336
AR4307g1117	I1RTL1#PHI:1245#FGSG_07520#5518#Fusarium_graminearum#unaffected_pathogenicity	69.106	0	989
AR4307g9682	J4KQS2#PHI:8671#phr1_(EJP69699)#176275#Beauveria_bassiana#unaffected_pathogenicity	69.043	0	864
AR4307g5112	A8QJI7#PHI:1020__PHI:1022__PHI:2362#XlnR__XLNR#5507#Fusarium_oxysporum#unaffected_pathogenicity	69.027	0	1231
AR4307g11654	I1RLM4#PHI:1977#GzZC292#5518#Fusarium_graminearum#unaffected_pathogenicity	68.917	0	921
AR4307g6551	Q2KN79#PHI:522__PHI:2808#GAS1__gas1#5507#Fusarium_oxysporum#reduced_virulence	68.889	0	751
AR4307g12762	A4RJV3#PHI:6135__PHI:6636#PEF1__MoMdv1#318829#Magnaporthe_oryzae#reduced_virulence	68.885	0	880
AR4307g7128	I1RSY2#PHI:1588#GzOB028#5518#Fusarium_graminearum#lethal	68.841	4.78e-66	199
AR4307g8955	I1RJM8#PHI:1206#(Sp_Prp4)#5518#Fusarium_graminearum#reduced_virulence	68.824	0	872
AR4307g5504	A0A1C3YMR1#PHI:5788#Fgsg03215#5518#Fusarium_graminearum#unaffected_pathogenicity	68.81	1.56e-152	434
AR4307g11848	M7THD3#PHI:6627#BcCPA1#40559#Botrytis_cinerea#reduced_virulence	68.75	4.76e-139	395
AR4307g10278	F9X691#PHI:4914#ZtCBR1#1047171#Zymoseptoria_tritici#reduced_virulence	68.726	2.38e-124	361
AR4307g1721	Q4WNW5#PHI:2970#argB#746128#Aspergillus_fumigatus#unaffected_pathogenicity	68.715	3.17e-178	502
AR4307g2553	G4XVC0#PHI:2302#CHS5#318829#Magnaporthe_oryzae#loss_of_pathogenicity	68.698	0	2527
AR4307g2382	I1RC01#PHI:1506#GzHOME001#5518#Fusarium_graminearum#unaffected_pathogenicity	68.675	0	728
AR4307g1806	I1RJA3#PHI:1881#GzZC196#5518#Fusarium_graminearum#unaffected_pathogenicity	68.657	0	688
AR4307g12353	I1RN03#PHI:1372#GzC2H035#5518#Fusarium_graminearum#unaffected_pathogenicity	68.627	1.22e-126	369
AR4307g2860	Q4X256#PHI:6556#mecA#746128#Aspergillus_fumigatus#unaffected_pathogenicity__reduced_virulence	68.616	0	679
AR4307g4084	W7N0U7#PHI:7145#FvSEL1#117187#Fusarium_verticillioides#reduced_virulence	68.615	0	1221
AR4307g3046	I1RMT5#PHI:1294#GzAPSES002#5518#Fusarium_graminearum#unaffected_pathogenicity	68.593	2.66e-178	505
AR4307g10050	I1ZIN3#PHI:6209#BbCyp9#176275#Beauveria_bassiana#unaffected_pathogenicity	68.592	0	704
AR4307g11346	I1RZJ1#PHI:1615#GzSGT1#5518#Fusarium_graminearum#unaffected_pathogenicity	68.558	0	816
AR4307g11101	I1RM09#PHI:2325__PHI:2502__PHI:5724#TEP1__FgTep1p__ScOrtholog_TEP1#5518#Fusarium_graminearum#reduced_virulence	68.552	0	820
AR4307g558	G4N1Y8#PHI:2209#endo-1_4-beta-xylanase_[GH10_family]#318829#Magnaporthe_oryzae#reduced_virulence	68.502	2.32e-156	464
AR4307g4295	I1RG67#PHI:1515#GzHOMEL009#5518#Fusarium_graminearum#unaffected_pathogenicity	68.481	1.04e-156	446
AR4307g9296	G4NES9#PHI:784#MGG_00056#318829#Magnaporthe_oryzae#reduced_virulence	68.465	4.12e-111	323
AR4307g1603	A0A0E0SA40#PHI:7025#FgRav2#5518#Fusarium_graminearum#loss_of_pathogenicity	68.405	2.06e-158	453
AR4307g5288	G4NHC2#PHI:5034#MoADH1#318829#Magnaporthe_oryzae#unaffected_pathogenicity	68.376	2.92e-178	501
AR4307g1465	I1S5J4#PHI:1866#GzZC181#5518#Fusarium_graminearum#unaffected_pathogenicity	68.333	9.65e-79	254
AR4307g8081	I1RVU7#PHI:1789#GzZC104#5518#Fusarium_graminearum#unaffected_pathogenicity	68.273	0	979
AR4307g4106	E3QI05#PHI:6826#GAA1#31870#Colletotrichum_graminicola#loss_of_pathogenicity	68.182	0	843
AR4307g4589	I1SAX2#PHI:1864#GzZC179#5518#Fusarium_graminearum#unaffected_pathogenicity	68.154	0	695
AR4307g8774	I1S1B7#PHI:1422#GzC2H090#5518#Fusarium_graminearum#reduced_virulence	68.092	0	830
AR4307g12550	I1RZL0#PHI:1414#GzC2H081#5518#Fusarium_graminearum#unaffected_pathogenicity	68.067	0	600
AR4307g3702	G4MU60#PHI:6615#Mocapn4#318829#Magnaporthe_oryzae#reduced_virulence	68.041	1.51e-120	348
AR4307g3877	G4NCG1#PHI:3234#MoLYS20#318829#Magnaporthe_oryzae#reduced_virulence	67.986	7.64e-136	401
AR4307g8030	I1RVT7#PHI:1790#GzZC105#5518#Fusarium_graminearum#lethal	67.972	0	1135
AR4307g7146	Q75T36#PHI:341#CPK1#5462#Colletotrichum_lagenaria#loss_of_pathogenicity	67.944	0	709
AR4307g10235	D9J222#PHI:2453#Snt2#5507#Fusarium_oxysporum#reduced_virulence	67.941	0	2095
AR4307g341	I1RQS1#PHI:1262#FGSG_06420#5518#Fusarium_graminearum#unaffected_pathogenicity	67.932	0	999
AR4307g3488	W7LTJ2#PHI:7146#FvHEX1#117187#Fusarium_verticillioides#unaffected_pathogenicity	67.878	0	649
AR4307g2778	J4KR13#PHI:5055#vosA#176275#Beauveria_bassiana#reduced_virulence	67.857	5.1e-94	286
AR4307g9225	I1RXB9#PHI:1625#GzOpi#5518#Fusarium_graminearum#unaffected_pathogenicity	67.812	1.1e-130	394
AR4307g8910	I1S8F7#PHI:1820#GzZC135#5518#Fusarium_graminearum#unaffected_pathogenicity	67.797	5.4e-143	419
AR4307g9710	I1RB67#PHI:1984#GzZC299#5518#Fusarium_graminearum#unaffected_pathogenicity	67.788	0	881
AR4307g7183	G3F417#PHI:3703#fvtox1#232082#Fusarium_virguliforme#reduced_virulence	67.742	3.35e-69	223
AR4307g3026	A0A0L9JQ40#PHI:6892#iscU#28901#Salmonella_enterica#reduced_virulence	67.742	3.3e-57	178
AR4307g6624	I1REI8#PHI:1093#FGSG_02077#5518#Fusarium_graminearum#reduced_virulence	67.692	9.8e-26	98.6
AR4307g8521	I1RP25#PHI:1225#FGSG_05775#5518#Fusarium_graminearum#lethal	67.686	0	1669
AR4307g12666	I1RTB9#PHI:1644#GzRFX1#5518#Fusarium_graminearum#unaffected_pathogenicity	67.686	0	1068
AR4307g8350	I1RBK8#PHI:1619#GzJUM001#5518#Fusarium_graminearum#unaffected_pathogenicity	67.667	0	556
AR4307g11323	Q8J2P6#PHI:317#RHBA#746128#Aspergillus_fumigatus#reduced_virulence	67.647	4.15e-79	255
AR4307g2084	G4N008#PHI:5395#MoSec62#318829#Magnaporthe_oryzae#reduced_virulence	67.609	6.75e-147	424
AR4307g6967	I1RNK3#PHI:1259#FGSG_05586#5518#Fusarium_graminearum#unaffected_pathogenicity	67.542	0	1323
AR4307g10348	I1RKA4#PHI:2432#FgRgsA#5518#Fusarium_graminearum#reduced_virulence	67.508	5.09e-140	410
AR4307g971	I1RHY5#PHI:6125__PHI:5716#FGSG_03402__ScOrtholog_PHO11#5518#Fusarium_graminearum#unaffected_pathogenicity	67.5	0	647
AR4307g5588	O59928#PHI:144#CHT42#29875#Trichoderma_virens#reduced_virulence	67.482	0	583
AR4307g7383	I1RC73#PHI:1933__PHI:6134#GzZC248__FHS1#5518#Fusarium_graminearum#reduced_virulence	67.48	0	656
AR4307g8821	Q9UVG2#PHI:177#ODC#13684#Parastagonospora_nodorum#reduced_virulence	67.447	0	607
AR4307g1960	I1RSJ5#PHI:1489#GzHMG021#5518#Fusarium_graminearum#unaffected_pathogenicity	67.432	0	572
AR4307g1679	P58371#PHI:2117#SPM1#318829#Magnaporthe_oryzae#reduced_virulence	67.407	0	726
AR4307g4643	I1RZU0#PHI:1691#GzZC006#5518#Fusarium_graminearum#unaffected_pathogenicity	67.401	0	623
AR4307g5892	N4VSY8#PHI:5111#FAM1#5465#Colletotrichum_orbiculare#loss_of_pathogenicity	67.391	2.72e-152	439
AR4307g1428	F0XP73#PHI:2693#GcABC-G1#226899#Grosmannia_clavigera#reduced_virulence	67.388	0	2058
AR4307g1115	J5K3K8#PHI:7151#pmcA#176275#Beauveria_bassiana#reduced_virulence	67.376	0	1600
AR4307g1990	I1RSG9#PHI:1466#GzCCAAT006#5518#Fusarium_graminearum#unaffected_pathogenicity	67.347	3.26e-99	290
AR4307g855	Q4WQ27#PHI:2519#LYS9#746128#Aspergillus_fumigatus#lethal	67.342	0	607
AR4307g12533	Q9C1T0#PHI:200#ARG1#5507#Fusarium_oxysporum#reduced_virulence	67.325	0	655
AR4307g3783	I1S7H5#PHI:1742#GzZC057#5518#Fusarium_graminearum#unaffected_pathogenicity	67.296	9.68e-55	197
AR4307g11644	I1RLS1#PHI:1369#GzC2H031#5518#Fusarium_graminearum#unaffected_pathogenicity	67.284	2.22e-137	394
AR4307g3959	I1S956#PHI:1720#GzZC035#5518#Fusarium_graminearum#unaffected_pathogenicity	67.257	0	729
AR4307g3110	Q2LK92#PHI:548__PHI:2305#BcPIC5__BcFKBP12#40559#Botrytis_cinerea#reduced_virulence__unaffected_pathogenicity__increased_virulence_(hypervirulence)	67.241	1.21e-48	154
AR4307g12295	I1S1P9#PHI:1787#GzZC102#5518#Fusarium_graminearum#unaffected_pathogenicity	67.234	0	645
AR4307g6708	I1RT69#PHI:1918#GzZC233#5518#Fusarium_graminearum#unaffected_pathogenicity	67.224	0	1222
AR4307g6688	I1RTA6#PHI:3863#FgGAL83#5518#Fusarium_graminearum#reduced_virulence	67.155	0	583
AR4307g6923	Q8J0H8#PHI:7228#tre1#318829#Magnaporthe_oryzae#unaffected_pathogenicity	67.117	0	961
AR4307g3690	I1RAA6#PHI:1256#FGSG_00433#5518#Fusarium_graminearum#unaffected_pathogenicity	67.111	0	1607
AR4307g12802	I1S4M4#PHI:1426#GzC2H094#5518#Fusarium_graminearum#unaffected_pathogenicity	67.11	0	657
AR4307g6151	A0A098DMJ4#PHI:5801#Fgsg04628#5518#Fusarium_graminearum#unaffected_pathogenicity	67.08	0	790
AR4307g2584	Q5EMY3#PHI:860#MSP1#318829#Magnaporthe_oryzae#reduced_virulence	67.067	0	575
AR4307g6081	Q4IMZ7#PHI:1673#GzDHHC001#5518#Fusarium_graminearum#unaffected_pathogenicity	67.045	0	627
AR4307g9142	Q4WJ77#PHI:7654#aroB#746128#Aspergillus_fumigatus#reduced_virulence	67.003	0	528
AR4307g11587	I1S006#PHI:1650#GzWing022#5518#Fusarium_graminearum#lethal	66.94	0	807
AR4307g11652	Q32WF7#PHI:2269#Mdh1#13684#Parastagonospora_nodorum#unaffected_pathogenicity	66.917	1.2e-135	386
AR4307g2692	I1RS27#PHI:1383#GzC2H046#5518#Fusarium_graminearum#unaffected_pathogenicity	66.914	8.46e-126	360
AR4307g8222	Q4WMR3#PHI:2526#LUC7#746128#Aspergillus_fumigatus#lethal	66.912	4.2e-120	347
AR4307g6173	E3QRA4#PHI:2920#FET3-1#31870#Colletotrichum_graminicola#reduced_virulence	66.898	0	811
AR4307g6266	O59939#PHI:222#PELB#474922#Colletotrichum_gloeosporioides#reduced_virulence	66.887	5.01e-123	359
AR4307g1204	I1RK21#PHI:1559#GzNEG001#5518#Fusarium_graminearum#unaffected_pathogenicity	66.797	2.98e-132	377
AR4307g5520	Q1HA66#PHI:6969#cokel2#5465#Colletotrichum_orbiculare#reduced_virulence	66.707	0	1047
AR4307g6628	I1REJ1#PHI:1662#GzCCHC002#5518#Fusarium_graminearum#unaffected_pathogenicity	66.667	0	680
AR4307g10492	M4Q9U3#PHI:3670#VdATG12#27337#Verticillium_dahliae#unaffected_pathogenicity	66.667	4.76e-59	182
AR4307g2408	H1VQ06#PHI:8878#ChBUB2_(XP_018164413)#80884#Colletotrichum_higginsianum#reduced_virulence	66.594	0	589
AR4307g3859	I1RI51#PHI:5792#Fgsg03476#5518#Fusarium_graminearum#unaffected_pathogenicity	66.583	0	515
AR4307g1582	I1RYG0#PHI:1410#GzC2H076#5518#Fusarium_graminearum#unaffected_pathogenicity	66.548	7.93e-110	322
AR4307g10924	I1RSR7#PHI:1796#GzZC111#5518#Fusarium_graminearum#unaffected_pathogenicity	66.453	0	1063
AR4307g2978	F5HCK8#PHI:415#IPMDH#13684#Parastagonospora_nodorum#loss_of_pathogenicity	66.393	1.35e-171	485
AR4307g8698	Q4WZV9#PHI:6555#sF#746128#Aspergillus_fumigatus#unaffected_pathogenicity	66.383	0	2095
AR4307g11682	I1RLT3#PHI:7718#FgOXP2#5518#Fusarium_graminearum#reduced_virulence	66.337	0	1793
AR4307g2037	B0YE73#PHI:7591#erg25B#746128#Aspergillus_fumigatus#unaffected_pathogenicity	66.33	4.49e-149	427
AR4307g10476	I1RU73#PHI:5820#Fgsg07757#5518#Fusarium_graminearum#unaffected_pathogenicity	66.301	3.97e-173	489
AR4307g11138	B9DR51#PHI:1133#Lmepi#5022#Leptosphaeria_maculans#loss_of_pathogenicity	66.24	6.37e-178	502
AR4307g7418	L2FHG9#PHI:3972#CDA#474922#Colletotrichum_gloeosporioides#unaffected_pathogenicity	66.238	1.13e-158	456
AR4307g1244	Q4WJ71#PHI:2539#CDS1#746128#Aspergillus_fumigatus#lethal	66.225	0	606
AR4307g4794	I1RMP5#PHI:5806#Fgsg05239#5518#Fusarium_graminearum#unaffected_pathogenicity	66.225	0	590
AR4307g12591	Q4WJS6#PHI:6753#GlcA#746128#Aspergillus_fumigatus#lethal	66.221	3.44e-145	423
AR4307g6182	I1REQ5#PHI:1711#GzZC026#5518#Fusarium_graminearum#unaffected_pathogenicity	66.165	3.1e-171	499
AR4307g12763	Q4WVS3#PHI:7652#aroC#746128#Aspergillus_fumigatus#reduced_virulence	66.16	1.19e-125	362
AR4307g10260	I1REA6#PHI:5822#Fgsg01989#5518#Fusarium_graminearum#unaffected_pathogenicity	66.154	0	528
AR4307g7411	G4MUF4#PHI:2143#MoVPR#318829#Magnaporthe_oryzae#reduced_virulence	66.138	3.22e-91	282
AR4307g9472	A9QUB2#PHI:2403#CSN1#169388#Fusarium_solani#increased_virulence_(hypervirulence)__reduced_virulence	66.09	2.51e-125	377
AR4307g3647	I1RND0#PHI:1900#GzZC215#5518#Fusarium_graminearum#unaffected_pathogenicity	66.081	0	1421
AR4307g132	O94196#PHI:458#MHP1#318829#Magnaporthe_oryzae#reduced_virulence	66	1.85e-39	128
AR4307g8811	Q4WP25#PHI:2542#ERG12#746128#Aspergillus_fumigatus#lethal	65.9	0	649
AR4307g2211	I1RRI0#PHI:1381#GzC2H044#5518#Fusarium_graminearum#unaffected_pathogenicity	65.882	0	587
AR4307g12883	I1RHP9#PHI:5795#Fgsg03310#5518#Fusarium_graminearum#unaffected_pathogenicity	65.879	1.52e-167	482
AR4307g2287	Q4X146#PHI:2515#ALG7#746128#Aspergillus_fumigatus#lethal	65.875	0	652
AR4307g6381	G4MUG1#PHI:8039__PHI:8046#Moaos1__Aos1#318829#Magnaporthe_oryzae#reduced_virulence	65.854	6.85e-171	494
AR4307g4259	Q04701#PHI:179#PELA#140110#Nectria_haematococca#reduced_virulence	65.844	6.72e-105	304
AR4307g7869	I1RPX8#PHI:1581#GzOB021#5518#Fusarium_graminearum#unaffected_pathogenicity	65.789	6.85e-134	382
AR4307g6872	A4QTE3#PHI:8927#MoSCAD1_(MGG_05096)#318829#Magnaporthe_oryzae#reduced_virulence__loss_of_pathogenicity	65.766	1.51e-156	444
AR4307g8929	I1S3J7#PHI:1424#GzC2H092#5518#Fusarium_graminearum#unaffected_pathogenicity	65.714	1.36e-23	105
AR4307g9958	Q4WTH5#PHI:4471#PtcB#746128#Aspergillus_fumigatus#loss_of_pathogenicity	65.64	0	561
AR4307g350	G4MZ21#PHI:8649#Poalkb1_(MGG_01363)#318829#Magnaporthe_oryzae#reduced_virulence	65.634	2.08e-157	447
AR4307g12064	Q0UA24#PHI:2256#Xdh1#13684#Parastagonospora_nodorum#unaffected_pathogenicity	65.616	2.27e-169	486
AR4307g12834	I1R9P8#PHI:5797#Fgsg00201#5518#Fusarium_graminearum#unaffected_pathogenicity	65.586	8.43e-178	503
AR4307g5699	O59939#PHI:222#PELB#474922#Colletotrichum_gloeosporioides#reduced_virulence	65.584	1.51e-128	373
AR4307g2578	I1RE63#PHI:743#ARG2#5518#Fusarium_graminearum#reduced_virulence	65.533	0	838
AR4307g10362	I1RK94#PHI:1367#GzC2H028#5518#Fusarium_graminearum#unaffected_pathogenicity	65.523	0	713
AR4307g12408	A0A1C3YJ97#PHI:5796#Fgsg02569#5518#Fusarium_graminearum#unaffected_pathogenicity	65.487	1.18e-152	441
AR4307g9738	A0A1C3YKY7#PHI:5818#Fgsg07136#5518#Fusarium_graminearum#unaffected_pathogenicity	65.356	0	542
AR4307g664	I1RR13#PHI:1709#GzZC024#5518#Fusarium_graminearum#unaffected_pathogenicity	65.35	0	724
AR4307g3039	I1RMT2#PHI:1940#GzZC255#5518#Fusarium_graminearum#unaffected_pathogenicity	65.321	0	701
AR4307g11256	G4MUR7#PHI:4475#MoTup1#318829#Magnaporthe_oryzae#loss_of_pathogenicity	65.28	0	730
AR4307g3328	O59939#PHI:222#PELB#474922#Colletotrichum_gloeosporioides#reduced_virulence	65.232	2.15e-118	347
AR4307g11497	G4MUW5#PHI:888#MGG_01707#318829#Magnaporthe_oryzae#reduced_virulence	65.217	1.94e-127	369
AR4307g4549	G4N8Y3#PHI:3213#MoCDIP1#318829#Magnaporthe_oryzae#effector_(plant_avirulence_determinant)	65.169	1.27e-158	452
AR4307g6444	Q5AND9#PHI:7009#arf2#5476#Candida_albicans#reduced_virulence	65.169	4.83e-88	258
AR4307g867	I1RJQ4#PHI:1365#GzC2H025#5518#Fusarium_graminearum#unaffected_pathogenicity	65.128	0	696
AR4307g9395	I1S7A6#PHI:1846#GzZC161#5518#Fusarium_graminearum#unaffected_pathogenicity	65.097	7.72e-165	500
AR4307g11733	I1RX94#PHI:1164#RRG1__SSK1#5518#Fusarium_graminearum#reduced_virulence	65.089	0	716
AR4307g2035	I1RZI7#PHI:1334#GzbZIP016#5518#Fusarium_graminearum#reduced_virulence	65.052	1.49e-92	278
AR4307g6421	O59928#PHI:144#CHT42#29875#Trichoderma_virens#reduced_virulence	65.049	0	561
AR4307g301	A0A290WFK0#PHI:7709#VEDA_05199#27337#Verticillium_dahliae#reduced_virulence__unaffected_pathogenicity	65.026	0	541
AR4307g3621	I1RNA7#PHI:1507#GzHOME002#5518#Fusarium_graminearum#unaffected_pathogenicity	64.977	0	530
AR4307g12015	Q4P245#PHI:2239#Spe-Sdh#5270#Ustilago_maydis#reduced_virulence	64.948	1.67e-137	409
AR4307g11643	I1RLS0#PHI:1957#GzZC272#5518#Fusarium_graminearum#unaffected_pathogenicity	64.868	0	1200
AR4307g9998	I1RQG9#PHI:1378#GzC2H041#5518#Fusarium_graminearum#unaffected_pathogenicity	64.835	0	912
AR4307g10636	J5JIF8#PHI:7153#pmcC#176275#Beauveria_bassiana#reduced_virulence	64.801	0	1378
AR4307g11400	Q4WYU7#PHI:2528#SLY1#746128#Aspergillus_fumigatus#lethal	64.763	0	935
AR4307g10818	I1RM58#PHI:5851#Fgsg05039#5518#Fusarium_graminearum#unaffected_pathogenicity	64.691	0	530
AR4307g1289	Q4W9S1#PHI:6557#cysB#746128#Aspergillus_fumigatus#unaffected_pathogenicity__reduced_virulence	64.646	0	640
AR4307g12148	I1RWB8#PHI:1402#GzC2H065#5518#Fusarium_graminearum#unaffected_pathogenicity	64.636	0	1030
AR4307g5612	G4NDE1#PHI:1017__PHI:2067#ABC4#318829#Magnaporthe_oryzae#reduced_virulence__loss_of_pathogenicity	64.634	3.58e-30	112
AR4307g7052	Q0V515#PHI:3914#Sdh1#13684#Parastagonospora_nodorum#reduced_virulence	64.523	0	635
AR4307g12269	G4MZ47#PHI:2105#Calcium_permease#318829#Magnaporthe_oryzae#unaffected_pathogenicity__reduced_virulence	64.477	0	1368
AR4307g10496	I1RY71#PHI:1313#GzbHLH014#5518#Fusarium_graminearum#unaffected_pathogenicity	64.469	0	592
AR4307g11986	I1RC69#PHI:1934#GzZC249#5518#Fusarium_graminearum#unaffected_pathogenicity	64.465	0	610
AR4307g2703	I1RS37#PHI:1643#GzWing015#5518#Fusarium_graminearum#reduced_virulence	64.433	0	920
AR4307g11240	A0A016PTV5#PHI:5393#GLX#5518#Fusarium_graminearum#reduced_virulence	64.415	0	780
AR4307g12067	G4MNA5#PHI:2096#Calcium-transporting_ATPase_3#318829#Magnaporthe_oryzae#loss_of_pathogenicity	64.38	0	1412
AR4307g8069	F5HAA8#PHI:424#PCK1#5207#Cryptococcus_neoformans#reduced_virulence	64.353	0	719
AR4307g5174	Q4WK03#PHI:2544#PAB1#746128#Aspergillus_fumigatus#lethal	64.332	0	840
AR4307g5200	G4NCS2#PHI:6780#MoCreC#318829#Magnaporthe_oryzae#reduced_virulence	64.261	0	728
AR4307g2761	G4N549#PHI:7273#Pmp1#318829#Magnaporthe_oryzae#reduced_virulence__unaffected_pathogenicity	64.25	0	687
AR4307g3247	O93841#PHI:243#CHIP6#474922#Colletotrichum_gloeosporioides#reduced_virulence	64.208	0	1181
AR4307g12615	I1RIL1#PHI:1835#GzZC150#5518#Fusarium_graminearum#unaffected_pathogenicity	64.148	0	824
AR4307g7722	Q4WCZ1#PHI:2969#argEF#746128#Aspergillus_fumigatus#reduced_virulence	64.145	0	1163
AR4307g5518	I1RKY2#PHI:1578#GzOB018#5518#Fusarium_graminearum#unaffected_pathogenicity	64.111	0	701
AR4307g50	G4N1N6#PHI:5191#TPX1#318829#Magnaporthe_oryzae#reduced_virulence	64.103	2.33e-67	212
AR4307g2820	Q5XTQ5#PHI:538#FRT1#40559#Botrytis_cinerea#unaffected_pathogenicity	64.057	0	682
AR4307g2747	I1S018#PHI:1689#GzZC004#5518#Fusarium_graminearum#unaffected_pathogenicity	64.018	0	1095
AR4307g2498	G4MMH7#PHI:2115__PHI:4494#Annexin_A7__AnnA7#318829#Magnaporthe_oryzae#loss_of_pathogenicity__reduced_virulence	63.988	3.76e-152	442
AR4307g3380	I1RJE6#PHI:5790#Fgsg03962#5518#Fusarium_graminearum#unaffected_pathogenicity	63.934	0	534
AR4307g5308	G4MKY1#PHI:7991#PoVps9_(MGG_05379)__PoVps9#318829#Magnaporthe_oryzae#reduced_virulence__loss_of_pathogenicity	63.928	0	805
AR4307g5380	J4KLZ9#PHI:7155#pmr1#176275#Beauveria_bassiana#reduced_virulence	63.927	0	571
AR4307g3552	J9N5P9#PHI:3168#SGE1#5507#Fusarium_oxysporum#reduced_virulence	63.839	7.11e-93	286
AR4307g1518	I1RHZ6#PHI:1887#GzZC202#5518#Fusarium_graminearum#unaffected_pathogenicity	63.836	0	904
AR4307g10620	I1RIV2#PHI:1007#NPS6#5518#Fusarium_graminearum#reduced_virulence	63.824	0	2756
AR4307g12021	I1RZY2#PHI:1556#GzNH001#5518#Fusarium_graminearum#reduced_virulence	63.819	2.26e-74	233
AR4307g2649	I1RCN9#PHI:2427#FgVELB#5518#Fusarium_graminearum#reduced_virulence	63.776	2.93e-156	456
AR4307g2175	Q4X1I3#PHI:2545#TIF35#746128#Aspergillus_fumigatus#lethal	63.763	1.23e-124	360
AR4307g5639	Q96TN6#PHI:256#GAS1#318829#Magnaporthe_oryzae#reduced_virulence	63.725	8.22e-87	259
AR4307g4877	I1RZC6#PHI:1088#FGSG_09759#5518#Fusarium_graminearum#unaffected_pathogenicity	63.699	6.9e-105	317
AR4307g10048	I1RBL8#PHI:1631#GzWing003#5518#Fusarium_graminearum#unaffected_pathogenicity	63.636	0	935
AR4307g1910	I1S2C4#PHI:5068#MCC#5518#Fusarium_graminearum#reduced_virulence	63.626	0	2413
AR4307g3869	G4NHC2#PHI:5034#MoADH1#318829#Magnaporthe_oryzae#unaffected_pathogenicity	63.61	1.01e-158	451
AR4307g6072	G4NA54#PHI:2214#endo-1_4-beta-xylanase_I_[GH10_family]#318829#Magnaporthe_oryzae#reduced_virulence	63.59	7.64e-92	273
AR4307g1054	Q9C4A0#PHI:2817#Aapg1#5599#Alternaria_alternata#unaffected_pathogenicity	63.506	9.97e-142	410
AR4307g2638	G4MNK1#PHI:5470#MoNgt1#318829#Magnaporthe_oryzae#reduced_virulence	63.483	2.39e-144	440
AR4307g9490	I1S3J8#PHI:5800#Fgsg11385#5518#Fusarium_graminearum#unaffected_pathogenicity	63.444	2.15e-152	434
AR4307g6222	Q7Z8E9#PHI:518#MST20#318829#Magnaporthe_oryzae#unaffected_pathogenicity	63.402	0	1002
AR4307g7728	E3QNW8#PHI:6228#KRE6#31870#Colletotrichum_graminicola#reduced_virulence	63.399	0	618
AR4307g4087	E3QHX9#PHI:6227#KRE5#31870#Colletotrichum_graminicola#reduced_virulence	63.376	0	1972
AR4307g9783	I1RSP9#PHI:1798#GzZC113#5518#Fusarium_graminearum#unaffected_pathogenicity	63.371	0	772
AR4307g4687	G4N740#PHI:4024#MoST1#318829#Magnaporthe_oryzae#unaffected_pathogenicity	63.352	0	670
AR4307g1697	I1RQC1#PHI:1310#GzbHLH011#5518#Fusarium_graminearum#unaffected_pathogenicity	63.297	3.05e-180	514
AR4307g11264	I1RFM9#PHI:3983#FGSG_02509.3_(Sc_gpi7)#5518#Fusarium_graminearum#reduced_virulence	63.268	0	1032
AR4307g9202	I1RXE9#PHI:1408#GzC2H072#5518#Fusarium_graminearum#unaffected_pathogenicity	63.239	0	576
AR4307g5740	I1RX22#PHI:1595#GzOB035#5518#Fusarium_graminearum#unaffected_pathogenicity	63.222	0	728
AR4307g11869	I1RWS0#PHI:1592#GzOB032#5518#Fusarium_graminearum#unaffected_pathogenicity	63.188	7.29e-152	433
AR4307g3588	G5EI34#PHI:3019#MoLys2#318829#Magnaporthe_oryzae#reduced_virulence	63.185	0	1573
AR4307g8724	G4NII5#PHI:2094#Yvc1#318829#Magnaporthe_oryzae#reduced_virulence__loss_of_pathogenicity	63.183	0	804
AR4307g3748	B3GXB6#PHI:7075#pdxS#715#Actinobacillus_pleuropneumoniae#reduced_virulence	63.103	7.7e-126	364
AR4307g5118	P43098#PHI:96#FAS2#5476#Candida_albicans#loss_of_pathogenicity	63.039	0	2424
AR4307g7748	I1S8E5#PHI:1433#GzC2H102#5518#Fusarium_graminearum#unaffected_pathogenicity	62.985	4.37e-143	416
AR4307g11960	G4MRB4#PHI:4491#SHM#318829#Magnaporthe_oryzae#reduced_virulence	62.863	0	618
AR4307g414	Q4HTT1#PHI:1468#GzCCAAT008#5518#Fusarium_graminearum#unaffected_pathogenicity	62.857	8.22e-36	121
AR4307g7132	I1RSX8#PHI:1795#GzZC110#5518#Fusarium_graminearum#unaffected_pathogenicity	62.833	0	771
AR4307g11544	N4X9G3#PHI:4233#ftr1#5016#Bipolaris_maydis#reduced_virulence	62.821	1.03e-26	99.4
AR4307g9746	Q86ZB5#PHI:7358#KLP7#40559#Botrytis_cinerea#reduced_virulence	62.813	1.52e-123	376
AR4307g2075	I1RZF2#PHI:1524#GzHOMEL033#5518#Fusarium_graminearum#unaffected_pathogenicity	62.764	0	624
AR4307g12392	I1RFR2#PHI:1089#FGSG_02549#5518#Fusarium_graminearum#reduced_virulence	62.712	1.17e-133	395
AR4307g10857	I1RM19#PHI:3036#FgERG3B#5518#Fusarium_graminearum#reduced_virulence	62.691	7.16e-148	421
AR4307g4672	I1S463#PHI:1690#GzZC005#5518#Fusarium_graminearum#unaffected_pathogenicity	62.672	0	621
AR4307g10953	G4NCG1#PHI:3234#MoLYS20#318829#Magnaporthe_oryzae#reduced_virulence	62.663	1.37e-173	496
AR4307g6250	G4MRZ9#PHI:2181#MoDUO1#318829#Magnaporthe_oryzae#reduced_virulence	62.617	3.13e-40	139
AR4307g10947	Q522W5#PHI:2086#Moatg24#318829#Magnaporthe_oryzae#unaffected_pathogenicity	62.602	0	610
AR4307g11839	G9MQ09#PHI:8509#tex10#29875#Trichoderma_virens#increased_virulence_(hypervirulence)	62.573	2.48e-145	414
AR4307g7119	G4N704#PHI:7992#PoMuk1_(MGG_06476)__PoMuk1#318829#Magnaporthe_oryzae#unaffected_pathogenicity__loss_of_pathogenicity	62.517	0	798
AR4307g7529	N4W395#PHI:5040#BFA1#5465#Colletotrichum_orbiculare#reduced_virulence	62.5	0	1079
AR4307g9382	G4N8G2#PHI:8522#MoYPEL1_(MGG_06263.7)#318829#Magnaporthe_oryzae#loss_of_pathogenicity	62.5	1.49e-66	203
AR4307g6036	I1RGC8#PHI:1838#GzZC153#5518#Fusarium_graminearum#unaffected_pathogenicity	62.48	0	806
AR4307g11716	I1RX79#PHI:1770#GzZC085#5518#Fusarium_graminearum#unaffected_pathogenicity	62.477	0	664
AR4307g1810	F9X691#PHI:4914#ZtCBR1#1047171#Zymoseptoria_tritici#reduced_virulence	62.437	3.43e-82	249
AR4307g8649	G4MW86#PHI:5594#FZC5#318829#Magnaporthe_oryzae#unaffected_pathogenicity	62.434	0	957
AR4307g10753	Q4WC58#PHI:3050#CHSF#746128#Aspergillus_fumigatus#reduced_virulence	62.418	0	1485
AR4307g2856	L2FHG9#PHI:3972#CDA#474922#Colletotrichum_gloeosporioides#unaffected_pathogenicity	62.382	6.59e-149	430
AR4307g5027	A0A0C4DHY4#PHI:4880#pgx6#5507#Fusarium_oxysporum#unaffected_pathogenicity__reduced_virulence	62.363	0	610
AR4307g1781	A0A0C4DHY2#PHI:4879#pg1#5507#Fusarium_oxysporum#unaffected_pathogenicity__reduced_virulence	62.36	4.26e-155	449
AR4307g11877	G4NCW8#PHI:2101#MGG_11454.5#318829#Magnaporthe_oryzae#unaffected_pathogenicity	62.338	0	525
AR4307g8017	I1RVS7#PHI:1792#GzZC107#5518#Fusarium_graminearum#unaffected_pathogenicity	62.297	0	854
AR4307g8818	Q6WER3#PHI:432__PHI:4212__PHI:4242#FGL1__Fgl1#5518#Fusarium_graminearum#reduced_virulence	62.162	7.04e-145	415
AR4307g6945	I1RNM1#PHI:1486#GzHMG018#5518#Fusarium_graminearum#unaffected_pathogenicity	62.162	1.64e-106	321
AR4307g9605	G4MPB7#PHI:4495#Bud6p#318829#Magnaporthe_oryzae#unaffected_pathogenicity	62.16	0	1131
AR4307g9468	I1REJ1#PHI:1662#GzCCHC002#5518#Fusarium_graminearum#unaffected_pathogenicity	62.14	0	619
AR4307g4233	I1RQ89#PHI:1641__PHI:2434#FgFlbA#5518#Fusarium_graminearum#reduced_virulence	62.121	0	580
AR4307g11623	Q525E4#PHI:2073__PHI:2091#Moatg5__MgATG5#318829#Magnaporthe_oryzae#loss_of_pathogenicity	62.109	8.02e-102	301
AR4307g9704	Q9C1C6#PHI:216#HDC1#5017#Bipolaris_zeicola#reduced_virulence	62.017	0	713
AR4307g290	I1RXK4#PHI:1823#GzZC138#5518#Fusarium_graminearum#unaffected_pathogenicity	61.972	2.82e-54	180
AR4307g6838	Q99324#PHI:191#TOM1#39703#Septoria_lycopersici#unaffected_pathogenicity	61.953	1.18e-126	385
AR4307g6536	I1S0W0#PHI:1417#GzC2H084#5518#Fusarium_graminearum#unaffected_pathogenicity	61.925	1.39e-94	278
AR4307g5470	A0A016PUA3#PHI:3659#NPS1#5518#Fusarium_graminearum#unaffected_pathogenicity__reduced_virulence	61.775	0	5866
AR4307g10618	A0A290WI18#PHI:7706#VEDA_05196#27337#Verticillium_dahliae#reduced_virulence__unaffected_pathogenicity__increased_virulence_(hypervirulence)	61.728	0	628
AR4307g5531	I1S8Y5#PHI:1434#GzC2H103#5518#Fusarium_graminearum#unaffected_pathogenicity	61.682	2.69e-154	446
AR4307g5833	I1RD28#PHI:1876#GzZC191#5518#Fusarium_graminearum#unaffected_pathogenicity	61.593	0	869
AR4307g9869	I1S0G0#PHI:1617#GzssDB002#5518#Fusarium_graminearum#unaffected_pathogenicity	61.589	2.44e-51	162
AR4307g2512	H8ZZ79#PHI:2710#mepB#474922#Colletotrichum_gloeosporioides#reduced_virulence	61.576	0	528
AR4307g4031	G4N8A1#PHI:2087#Moatg26#318829#Magnaporthe_oryzae#unaffected_pathogenicity	61.554	0	1727
AR4307g1388	G4NCA2#PHI:2016#PTH2#318829#Magnaporthe_oryzae#loss_of_pathogenicity	61.538	1.68e-85	255
AR4307g1142	G4N5E4#PHI:2060#MgLig4#318829#Magnaporthe_oryzae#unaffected_pathogenicity	61.515	0	1216
AR4307g10940	Q70ZY8#PHI:2524#nudC#746128#Aspergillus_fumigatus#lethal	61.453	5.8e-76	229
AR4307g10877	I1RNU2#PHI:1895#GzZC210#5518#Fusarium_graminearum#unaffected_pathogenicity	61.443	0	572
AR4307g1820	G4N2X9#PHI:5189#MoLDS1#318829#Magnaporthe_oryzae#reduced_virulence	61.435	0	1429
AR4307g9718	I1RE42#PHI:1541#GzFlbD#5518#Fusarium_graminearum#unaffected_pathogenicity	61.433	3.78e-97	289
AR4307g1651	I1RYC5#PHI:5819#Fgsg09370#5518#Fusarium_graminearum#unaffected_pathogenicity	61.421	2.73e-145	420
AR4307g7979	Q0V515#PHI:3914#Sdh1#13684#Parastagonospora_nodorum#reduced_virulence	61.35	0	597
AR4307g4627	G4ND53#PHI:4084#MoPex19#318829#Magnaporthe_oryzae#loss_of_pathogenicity	61.348	3.55e-90	281
AR4307g10786	G2X5W3#PHI:8559#SOM1_(VDAG_JR2_Chr1g09120a)#27337#Verticillium_dahliae#loss_of_pathogenicity__reduced_virulence	61.345	0	769
AR4307g4500	B0LFQ7#PHI:3523#Bx-Prx#6326#Bursaphelenchus_xylophilus#loss_of_pathogenicity	61.34	1.71e-86	256
AR4307g1039	I1RXE8#PHI:1763#GzZC078#5518#Fusarium_graminearum#unaffected_pathogenicity	61.337	0	864
AR4307g11961	G2XAE9#PHI:5387#VdCYC8#27337#Verticillium_dahliae#reduced_virulence	61.287	0	909
AR4307g10537	A0A0G4J7R2#PHI:7735#PbCYP3#318829#Magnaporthe_oryzae#reduced_virulence	61.272	1.16e-66	203
AR4307g7258	I1RWN5#PHI:1550#GzMyb014#5518#Fusarium_graminearum#unaffected_pathogenicity	61.261	0	643
AR4307g6953	G4NBI7#PHI:2028#TGL1-2#318829#Magnaporthe_oryzae#unaffected_pathogenicity	61.23	0	922
AR4307g8734	Q0UHM8#PHI:2257#Pbl1#13684#Parastagonospora_nodorum#unaffected_pathogenicity	61.194	2.91e-126	371
AR4307g12551	Q523C3#PHI:2072#Moatg4#318829#Magnaporthe_oryzae#loss_of_pathogenicity	61.145	0	578
AR4307g8854	Q00350#PHI:572#XYL2#5017#Bipolaris_zeicola#unaffected_pathogenicity	61.135	1.01e-96	283
AR4307g10013	I1RQI0#PHI:1975#GzZC290#5518#Fusarium_graminearum#unaffected_pathogenicity	61.123	0	568
AR4307g11882	G4MZD0#PHI:3060__PHI:4054#Molrg1__Lrg1#318829#Magnaporthe_oryzae#loss_of_pathogenicity	61.089	0	1398
AR4307g2121	I1RQ27#PHI:1914#GzZC229#5518#Fusarium_graminearum#unaffected_pathogenicity	61.087	0	1093
AR4307g2729	I1RZN4#PHI:1753#GzZC068#5518#Fusarium_graminearum#unaffected_pathogenicity	61.017	1.31e-15	72
AR4307g404	G4MNH3#PHI:5635#FZC40#318829#Magnaporthe_oryzae#unaffected_pathogenicity	61.013	1.09e-168	520
AR4307g8135	M1WES1#PHI:6267__PHI:8120#cpipt-log__ipt-log_(cpur_04177)#5111#Claviceps_purpurea#reduced_virulence__loss_of_pathogenicity__unaffected_pathogenicity	61.01	0	540
AR4307g9291	I1S3Z9#PHI:1774#GzZC089#5518#Fusarium_graminearum#lethal	61.004	0	806
AR4307g3657	Q4IB96#PHI:1546#GzMyb010#5518#Fusarium_graminearum#lethal	60.984	0	1587
AR4307g5021	Q5KAG0#PHI:4197#LHC1#5207#Cryptococcus_neoformans#reduced_virulence	60.963	3.6e-169	485
AR4307g3353	I1S674#PHI:1337#GzbZIP019#5518#Fusarium_graminearum#unaffected_pathogenicity	60.915	0	588
AR4307g11471	Q4WLT4#PHI:2533#FKS1#746128#Aspergillus_fumigatus#lethal	60.912	0	2327
AR4307g10563	I1RIR0#PHI:1928#GzZC243#5518#Fusarium_graminearum#unaffected_pathogenicity	60.904	0	615
AR4307g2699	I1RS33#PHI:1250#FGSG_06940#5518#Fusarium_graminearum#unaffected_pathogenicity	60.902	0	778
AR4307g3891	Q9C1I7#PHI:310#MgAtr4#1047171#Zymoseptoria_tritici#reduced_virulence	60.896	0	1857
AR4307g5757	O59937#PHI:569#XYL3#5507#Fusarium_oxysporum#unaffected_pathogenicity	60.87	1.16e-12	67.4
AR4307g8643	A6RSE2#PHI:7159#bcelp4#40559#Botrytis_cinerea#reduced_virulence	60.839	6.59e-53	173
AR4307g5522	I1RWM5#PHI:1184__PHI:6974#(Sc_Gin4-like)__gil1#5518#Fusarium_graminearum#reduced_virulence	60.838	0	1038
AR4307g11542	A5H456#PHI:867__PHI:1159#MgAtr7#1047171#Zymoseptoria_tritici#unaffected_pathogenicity__chemistry_target:_sensitivity_to_chemical	60.828	2.35e-114	402
AR4307g3832	I1RV74#PHI:1399#GzC2H062#5518#Fusarium_graminearum#unaffected_pathogenicity	60.809	0	795
AR4307g223	I1RAZ9#PHI:1472#GzHMG004#5518#Fusarium_graminearum#unaffected_pathogenicity	60.726	0	707
AR4307g12213	I1S3J7#PHI:1424#GzC2H092#5518#Fusarium_graminearum#unaffected_pathogenicity	60.714	7.9e-19	87.4
AR4307g2679	Q5AMP3#PHI:7011#arl1#5476#Candida_albicans#reduced_virulence	60.656	1.63e-74	223
AR4307g10599	J9VKY2#PHI:6605#HVA1#5207#Cryptococcus_neoformans#increased_virulence_(hypervirulence)	60.606	4.41e-22	82
AR4307g6504	T2C7K6#PHI:3226#pnl1#36651#Penicillium_digitatum#reduced_virulence	60.597	8.21e-133	387
AR4307g5764	I1RCQ4#PHI:1919#GzZC234#5518#Fusarium_graminearum#unaffected_pathogenicity	60.573	0	1101
AR4307g8249	I1RW28#PHI:1646#GzWing018#5518#Fusarium_graminearum#reduced_virulence	60.552	0	1015
AR4307g11247	G4MV40#PHI:6395#MoALR2#318829#Magnaporthe_oryzae#reduced_virulence	60.543	0	750
AR4307g11532	I1RWY8#PHI:1821#GzZC136#5518#Fusarium_graminearum#unaffected_pathogenicity	60.497	4.89e-152	454
AR4307g743	I1RHH3#PHI:1908#GzZC223#5518#Fusarium_graminearum#unaffected_pathogenicity	60.345	1.45e-17	77.8
AR4307g11875	I1RWS6#PHI:1593#GzOB033#5518#Fusarium_graminearum#unaffected_pathogenicity	60.305	1.27e-105	309
AR4307g11826	I1RDW5#PHI:5816#Fgsg01833#5518#Fusarium_graminearum#unaffected_pathogenicity	60.278	1.75e-151	434
AR4307g12421	A0A177DU44#PHI:8000#csn5#5599#Alternaria_alternata#reduced_virulence	60.237	3.83e-151	432
AR4307g12345	I1RN12#PHI:1937#GzZC252#5518#Fusarium_graminearum#unaffected_pathogenicity	60.202	0	898
AR4307g12510	A0A0D2XJY4#PHI:4723#gnn1#5507#Fusarium_oxysporum#unaffected_pathogenicity	60.188	0	893
AR4307g5305	I1RAQ0#PHI:1344#GzC2H004#5518#Fusarium_graminearum#unaffected_pathogenicity	60.171	0	1291
AR4307g246	G4N6Q1#PHI:2074#Moatg6#318829#Magnaporthe_oryzae#loss_of_pathogenicity	60.159	0	597
AR4307g6906	I1RNQ2#PHI:1170__PHI:1174#HDF3#5518#Fusarium_graminearum#unaffected_pathogenicity__reduced_virulence	60.137	0	1233
AR4307g9009	Q4R1B9#PHI:2065#MSTU1#318829#Magnaporthe_oryzae#loss_of_pathogenicity	60.123	0	607
AR4307g12559	W5ZQ93#PHI:3417#Ohmm#176275#Beauveria_bassiana#increased_virulence_(hypervirulence)	60.12	0	1180
AR4307g4147	I1RS06#PHI:1665#GzCCHC005#5518#Fusarium_graminearum#unaffected_pathogenicity	60.073	1.64e-86	260
AR4307g9384	G2X8Y4#PHI:7741#FreB#27337#Verticillium_dahliae#reduced_virulence	59.898	0	729
AR4307g5873	I1RD69#PHI:1620#GzJUM002#5518#Fusarium_graminearum#unaffected_pathogenicity	59.844	0	1602
AR4307g4799	I1RMP0#PHI:1485#GzHMG017#5518#Fusarium_graminearum#unaffected_pathogenicity	59.804	0	945
AR4307g398	G2XBR1#PHI:3708#VdSSP1#27337#Verticillium_dahliae#reduced_virulence	59.792	0	1239
AR4307g7555	I1RMG7#PHI:1954#GzZC269#5518#Fusarium_graminearum#unaffected_pathogenicity	59.765	0	824
AR4307g2165	I1RM88#PHI:1450#GzGATA008#5518#Fusarium_graminearum#lethal	59.761	1.25e-72	231
AR4307g5837	I1RD24#PHI:5091#FgRic8#5518#Fusarium_graminearum#reduced_virulence	59.743	0	532
AR4307g1649	I1RYC6#PHI:1824#GzZC139#5518#Fusarium_graminearum#unaffected_pathogenicity	59.717	0	709
AR4307g3642	I1RNC6#PHI:1465#GzCCAAT005#5518#Fusarium_graminearum#unaffected_pathogenicity	59.71	7.39e-89	271
AR4307g9668	G4MWK9#PHI:8929#MoSCAD3_(MGG_01180)#318829#Magnaporthe_oryzae#reduced_virulence	59.696	3.21e-114	331
AR4307g12341	A0A016PW58#PHI:3658#NPS2#5518#Fusarium_graminearum#unaffected_pathogenicity__reduced_virulence	59.695	0	5898
AR4307g8158	I1RWH6#PHI:1404#GzC2H067#5518#Fusarium_graminearum#unaffected_pathogenicity	59.688	0	641
AR4307g4168	Q9C1I7#PHI:310#MgAtr4#1047171#Zymoseptoria_tritici#reduced_virulence	59.662	0	1794
AR4307g6533	A0A0G4J7R2#PHI:7735#PbCYP3#318829#Magnaporthe_oryzae#reduced_virulence	59.649	3.12e-66	209
AR4307g1947	Q9HEQ8#PHI:335#CGRA#746128#Aspergillus_fumigatus#reduced_virulence	59.649	1.85e-39	129
AR4307g5843	I1RD01#PHI:1479#GzHMG011#5518#Fusarium_graminearum#unaffected_pathogenicity	59.643	0	1187
AR4307g11543	I1RMG9#PHI:1011#FET3#5518#Fusarium_graminearum#unaffected_pathogenicity	59.615	6.17e-14	67
AR4307g1225	Q4WGN8#PHI:8590#met8_(AFUA_7G05680)#746128#Aspergillus_fumigatus#reduced_virulence__unaffected_pathogenicity	59.608	5.66e-108	315
AR4307g5458	Q6Y392#PHI:1085#Ptr2#13684#Parastagonospora_nodorum#unaffected_pathogenicity	59.598	0	686
AR4307g6192	I1RYK8#PHI:1847#GzZC162#5518#Fusarium_graminearum#unaffected_pathogenicity	59.579	3.89e-180	532
AR4307g11796	G4NL37#PHI:893#MGG_02986#318829#Magnaporthe_oryzae#reduced_virulence	59.501	0	2035
AR4307g10637	I1RHF1#PHI:1912#GzZC227#5518#Fusarium_graminearum#unaffected_pathogenicity	59.496	0	686
AR4307g11066	G3F417#PHI:3703#fvtox1#232082#Fusarium_virguliforme#reduced_virulence	59.494	4.7e-64	202
AR4307g3948	I1RVR1#PHI:1860#GzZC175#5518#Fusarium_graminearum#unaffected_pathogenicity	59.459	0	710
AR4307g9645	Q4WR83#PHI:2321#SidI#746128#Aspergillus_fumigatus#reduced_virulence	59.441	0	719
AR4307g7320	Q6WIH5#PHI:4970#MEP1#523103#Trichophyton_mentagrophytes#reduced_virulence	59.39	0	761
AR4307g11165	I1RTP1#PHI:5785#Fgsg07554#5518#Fusarium_graminearum#unaffected_pathogenicity	59.386	8.99e-135	386
AR4307g4022	I1RUH0#PHI:1330#GzbZIP012#5518#Fusarium_graminearum#unaffected_pathogenicity	59.375	1.23e-23	93.6
AR4307g9003	Q4WNQ3#PHI:8876#gefB_(Afu4g06570)#746128#Aspergillus_fumigatus#unaffected_pathogenicity__loss_of_pathogenicity	59.369	0	621
AR4307g2180	G4MTK2#PHI:5232#MoARG1#318829#Magnaporthe_oryzae#loss_of_pathogenicity	59.358	5.93e-155	444
AR4307g7277	G4NJL1#PHI:2027#TGL1-1#318829#Magnaporthe_oryzae#unaffected_pathogenicity	59.314	0	701
AR4307g3863	Q5KAG0#PHI:4197#LHC1#5207#Cryptococcus_neoformans#reduced_virulence	59.314	3.22e-171	490
AR4307g7438	Q00845#PHI:180#PELD#140110#Nectria_haematococca#reduced_virulence	59.307	1.25e-90	269
AR4307g2664	G2YTS7#PHI:7722#BcDGAT2#40559#Botrytis_cinerea#reduced_virulence	59.28	4.81e-159	464
AR4307g4105	Q4WLP9#PHI:6861#rbdA#746128#Aspergillus_fumigatus#reduced_virulence	59.242	1.91e-85	256
AR4307g6076	Q4WJR9#PHI:6554#sB#746128#Aspergillus_fumigatus#unaffected_pathogenicity	59.236	0	895
AR4307g12744	Q4WXC5#PHI:2531#PRI1#746128#Aspergillus_fumigatus#lethal	59.176	0	610
AR4307g4845	G4NF65#PHI:3061__PHI:4055#MoRga1__Rga1#318829#Magnaporthe_oryzae#unaffected_pathogenicity	59.155	0	1236
AR4307g11114	I1RXS2#PHI:1759#GzZC074#5518#Fusarium_graminearum#unaffected_pathogenicity	59.15	0	713
AR4307g3059	M1RXP4#PHI:4165#ALG3#318829#Magnaporthe_oryzae#reduced_virulence	59.132	0	531
AR4307g7376	I1RC79#PHI:1462#GzCCAAT002#5518#Fusarium_graminearum#reduced_virulence	59.122	4.74e-88	266
AR4307g2208	I1RRH8#PHI:1892#GzZC207#5518#Fusarium_graminearum#unaffected_pathogenicity	59.114	0	918
AR4307g5925	Q5XTQ4#PHI:541#LIP1#40559#Botrytis_cinerea#unaffected_pathogenicity	59.059	0	669
AR4307g1972	G4MQP9#PHI:2177#PAS1#318829#Magnaporthe_oryzae#unaffected_pathogenicity	59.005	0	1347
AR4307g1528	Q0R411#PHI:6417#Sm1#29875#Trichoderma_virens#reduced_virulence	58.993	6e-55	170
AR4307g4950	I1S3C6#PHI:4246#xyl03624#5518#Fusarium_graminearum#unaffected_pathogenicity	58.974	6.99e-10	58.5
AR4307g11359	G4N1A3#PHI:2167#EXP5#318829#Magnaporthe_oryzae#reduced_virulence	58.901	0	1547
AR4307g9436	Q5A5P7#PHI:4891#orf19.5352#5476#Candida_albicans#unaffected_pathogenicity	58.901	5.01e-142	420
AR4307g3161	Q4I0C5#PHI:1764#GzZC079#5518#Fusarium_graminearum#unaffected_pathogenicity	58.877	0	691
AR4307g7893	E9RBG1#PHI:4230__PHI:8901#abcB__abcG1#746128#Aspergillus_fumigatus#reduced_virulence__unaffected_pathogenicity	58.861	0	1545
AR4307g472	I1RTH7#PHI:1890#GzZC205#5518#Fusarium_graminearum#unaffected_pathogenicity	58.833	0	711
AR4307g8694	M7TSY2#PHI:7975#Nop53#40559#Botrytis_cinerea#reduced_virulence	58.824	1.39e-157	455
AR4307g8119	J4KR13#PHI:5055#vosA#176275#Beauveria_bassiana#reduced_virulence	58.824	2.76e-23	93.2
AR4307g7481	Q9C4A0#PHI:2817#Aapg1#5599#Alternaria_alternata#unaffected_pathogenicity	58.79	6.57e-127	371
AR4307g8735	G2XD29#PHI:2731#VdSge1#27337#Verticillium_dahliae#loss_of_pathogenicity	58.719	0	659
AR4307g4875	G4NIP8#PHI:2104#MGG_04159.5#318829#Magnaporthe_oryzae#unaffected_pathogenicity	58.689	0	624
AR4307g1273	Q4W9S1#PHI:6557#cysB#746128#Aspergillus_fumigatus#unaffected_pathogenicity__reduced_virulence	58.661	0	630
AR4307g11089	I1S5H3#PHI:1729#GzZC044#5518#Fusarium_graminearum#unaffected_pathogenicity	58.621	8.61e-165	476
AR4307g9748	Q00845#PHI:180#PELD#140110#Nectria_haematococca#reduced_virulence	58.621	2.61e-80	241
AR4307g9370	I1RA77#PHI:1986#GzZC301#5518#Fusarium_graminearum#unaffected_pathogenicity	58.587	0	850
AR4307g1520	T2C913#PHI:3225#Ndo1#36651#Penicillium_digitatum#unaffected_pathogenicity	58.561	0	518
AR4307g2514	I1RCE1#PHI:1568#GzOB008#5518#Fusarium_graminearum#unaffected_pathogenicity	58.524	0	1211
AR4307g7587	G4MKP6#PHI:3161#Mohik5#318829#Magnaporthe_oryzae#loss_of_pathogenicity	58.499	0	2062
AR4307g8691	G4NIR9#PHI:806#MGG_04137#318829#Magnaporthe_oryzae#reduced_virulence	58.498	3.04e-92	280
AR4307g10144	O42825#PHI:270#RHO1#5476#Candida_albicans#loss_of_pathogenicity	58.48	2.5e-69	214
AR4307g12094	G4N7U7#PHI:8629#MoAbp1_(MGG_06358)#318829#Magnaporthe_oryzae#reduced_virulence	58.46	0	749
AR4307g8717	I1RJY6#PHI:1707#GzZC022#5518#Fusarium_graminearum#unaffected_pathogenicity	58.434	0	911
AR4307g6265	A0A0D2XPQ9#PHI:7636#PARG#5507#Fusarium_oxysporum#unaffected_pathogenicity	58.422	0	558
AR4307g5886	G4MQZ9#PHI:2025#HDL1#318829#Magnaporthe_oryzae#unaffected_pathogenicity	58.397	0	919
AR4307g6758	G4MLU0#PHI:2208#endo-1_4-beta-xylanase_[GH10_family]#318829#Magnaporthe_oryzae#reduced_virulence	58.387	6.59e-135	401
AR4307g12811	G4MYZ2#PHI:2078#Moatg10#318829#Magnaporthe_oryzae#loss_of_pathogenicity	58.369	1.98e-98	289
AR4307g9743	G4ZAY8#PHI:5016#Psimpa1#67593#Phytophthora_sojae#reduced_virulence	58.365	0	570
AR4307g9615	G4NCI6#PHI:6612#Mocapn9#318829#Magnaporthe_oryzae#unaffected_pathogenicity__reduced_virulence	58.358	0	760
AR4307g9427	G2X6V8#PHI:6331#VdCYP1#27337#Verticillium_dahliae#loss_of_pathogenicity	58.351	0	590
AR4307g978	I1RHR0#PHI:1904#GzZC219#5518#Fusarium_graminearum#unaffected_pathogenicity	58.333	3.76e-18	79
AR4307g891	G4MYY5#PHI:7993#PoVrl1_(MGG_10958)__PoVrl1#318829#Magnaporthe_oryzae#unaffected_pathogenicity	58.327	0	1514
AR4307g7720	G4MTF8#PHI:2204#endo-1_4-beta-xylanase_[GH10_family]#318829#Magnaporthe_oryzae#reduced_virulence	58.305	6.42e-118	343
AR4307g8859	I1RPI4#PHI:1002#GCS1#5518#Fusarium_graminearum#reduced_virulence__unaffected_pathogenicity	58.287	0	644
AR4307g509	G4NB53#PHI:5472#MoDeam#318829#Magnaporthe_oryzae#reduced_virulence	58.284	1.3e-137	398
AR4307g6986	E3Q2L6#PHI:6825#GPI12#31870#Colletotrichum_graminicola#loss_of_pathogenicity	58.199	9.91e-123	357
AR4307g8906	A0A0E0S4Y7#PHI:8646#FgLDHL2_(FGSG_16220)#5518#Fusarium_graminearum#reduced_virulence	58.173	8.82e-171	491
AR4307g2775	W7N2B4#PHI:3381#FVEG_12533#117187#Fusarium_verticillioides#unaffected_pathogenicity	58.144	0	635
AR4307g3067	J5JDI1#PHI:3095#Ktr1#176275#Beauveria_bassiana#unaffected_pathogenicity	58.051	0	575
AR4307g9306	Q4WEN8#PHI:2522#SPE2#746128#Aspergillus_fumigatus#lethal	57.996	0	544
AR4307g6831	G4NCF7#PHI:2138#SGA1#318829#Magnaporthe_oryzae#unaffected_pathogenicity__loss_of_pathogenicity	57.944	3.78e-34	132
AR4307g2678	O13289#PHI:106__PHI:7209#CAT1__cat1#5476#Candida_albicans#reduced_virulence__unaffected_pathogenicity	57.917	0	574
AR4307g4353	I1RJB0#PHI:1880#GzZC195#5518#Fusarium_graminearum#unaffected_pathogenicity	57.912	0	695
AR4307g106	G4MTK2#PHI:5232#MoARG1#318829#Magnaporthe_oryzae#loss_of_pathogenicity	57.857	4.19e-173	492
AR4307g4062	I1RUL5#PHI:1395#GzC2H058#5518#Fusarium_graminearum#unaffected_pathogenicity	57.839	0	534
AR4307g7149	G4NCG1#PHI:3234#MoLYS20#318829#Magnaporthe_oryzae#reduced_virulence	57.794	6.8e-155	452
AR4307g5410	Q8XW15#PHI:8884#aroG1#305#Ralstonia_solanacearum#loss_of_pathogenicity	57.79	7.67e-135	392
AR4307g10751	I1RCG0#PHI:1539#GzMyb003#5518#Fusarium_graminearum#unaffected_pathogenicity	57.736	1.16e-78	240
AR4307g5799	A7EB00#PHI:3936#Ss-caf1#5180#Sclerotinia_sclerotiorum#loss_of_pathogenicity	57.732	7.45e-77	231
AR4307g11679	A0A1W5T7B8#PHI:7243#pks15#176275#Beauveria_bassiana#reduced_virulence	57.731	0	2660
AR4307g12416	Q4WUL6#PHI:362__PHI:2520#LYSF__LYS4#746128#Aspergillus_fumigatus#loss_of_pathogenicity__lethal	57.697	0	863
AR4307g11320	Q8TG40#PHI:4925#Hbr1#5476#Candida_albicans#reduced_virulence	57.658	1.19e-41	139
AR4307g2961	I1RU53#PHI:1390#GzC2H053#5518#Fusarium_graminearum#unaffected_pathogenicity	57.639	5.84e-53	184
AR4307g4674	I1RYA7#PHI:1693#GzZC008#5518#Fusarium_graminearum#unaffected_pathogenicity	57.616	0	676
AR4307g11755	Q4WEM7#PHI:2521#GUS1#746128#Aspergillus_fumigatus#lethal	57.576	0	711
AR4307g183	A0A095EN78#PHI:4555#URE1#552467#Cryptococcus_gattii_vgiii#reduced_virulence	57.569	0	986
AR4307g9496	I1RIL9#PHI:8803#FgShyC_(FGSG_03657)#5518#Fusarium_graminearum#unaffected_pathogenicity	57.554	8.33e-178	506
AR4307g4927	I1RZ96#PHI:1751#GzZC066#5518#Fusarium_graminearum#unaffected_pathogenicity	57.504	0	549
AR4307g11271	W7MS01#PHI:3389#FVEG_12521#117187#Fusarium_verticillioides#unaffected_pathogenicity	57.485	0	570
AR4307g3119	Q59RG0#PHI:511#CaNAG4#5476#Candida_albicans#reduced_virulence	57.447	0	535
AR4307g7313	I1S914#PHI:1721#GzZC036#5518#Fusarium_graminearum#unaffected_pathogenicity	57.441	7.73e-159	455
AR4307g1716	G4NCF7#PHI:2138#SGA1#318829#Magnaporthe_oryzae#unaffected_pathogenicity__loss_of_pathogenicity	57.402	0	787
AR4307g2407	Q4WJR9#PHI:6554#sB#746128#Aspergillus_fumigatus#unaffected_pathogenicity	57.383	0	905
AR4307g5685	I1RF25#PHI:1657#GzCCCH001#5518#Fusarium_graminearum#unaffected_pathogenicity	57.38	0	2170
AR4307g4605	A7F946#PHI:2411#Ss-ggt1#5180#Sclerotinia_sclerotiorum#reduced_virulence	57.377	1.41e-138	413
AR4307g5597	Q2VLJ1#PHI:716#ZEB1#5518#Fusarium_graminearum#unaffected_pathogenicity	57.377	7.38e-17	79.7
AR4307g3784	I1S7H5#PHI:1742#GzZC057#5518#Fusarium_graminearum#unaffected_pathogenicity	57.362	2.25e-98	320
AR4307g10896	Q4WDL0#PHI:2525#TOM40#746128#Aspergillus_fumigatus#lethal	57.349	1.84e-145	418
AR4307g6837	Q99324#PHI:191#TOM1#39703#Septoria_lycopersici#unaffected_pathogenicity	57.339	5.22e-80	261
AR4307g5111	G4MT25#PHI:5591#MoNIT4#318829#Magnaporthe_oryzae#unaffected_pathogenicity	57.336	0	1027
AR4307g9679	I1RB90#PHI:1983#GzZC298#5518#Fusarium_graminearum#lethal	57.332	0	1082
AR4307g517	I1R9D4#PHI:2000#GzZC315#5518#Fusarium_graminearum#unaffected_pathogenicity	57.329	0	704
AR4307g5528	B0YDG4#PHI:3237#ctrA2#746128#Aspergillus_fumigatus#unaffected_pathogenicity	57.317	1.18e-58	184
AR4307g10146	I1RA07#PHI:1538__PHI:4209__PHI:4236#GzMyb002__MYT3#5518#Fusarium_graminearum#reduced_virulence	57.307	0	1761
AR4307g2882	G4MZS7#PHI:800#MGG_13324#318829#Magnaporthe_oryzae#reduced_virulence	57.3	0	1249
AR4307g1824	Q5AG40#PHI:2553#VPS4#5476#Candida_albicans#loss_of_pathogenicity	57.275	2.46e-178	508
AR4307g3290	I1R980#PHI:2393#(O-methylsterigmatocystin_oxidoreductase)#5518#Fusarium_graminearum#increased_virulence_(hypervirulence)	57.26	0	573
AR4307g10728	I1RCI2#PHI:1350#GzC2H010#5518#Fusarium_graminearum#unaffected_pathogenicity	57.143	7.23e-98	291
AR4307g6667	I1REN7#PHI:1681#GzNF001#5518#Fusarium_graminearum#unaffected_pathogenicity	57.075	0	2663
AR4307g3830	I1RV71#PHI:1812#GzZC127#5518#Fusarium_graminearum#unaffected_pathogenicity	57.074	0	691
AR4307g10510	I1RCX3#PHI:1540#GzMyb004#5518#Fusarium_graminearum#unaffected_pathogenicity	57.057	0	914
AR4307g11585	G4NEK6#PHI:2029#TGL2#318829#Magnaporthe_oryzae#unaffected_pathogenicity	56.997	2.79e-110	327
AR4307g11874	J4UPL6#PHI:5394#mas5#176275#Beauveria_bassiana#loss_of_pathogenicity	56.944	3.34e-19	85.1
AR4307g6370	I1RNH0#PHI:1265#FGSG_05549#5518#Fusarium_graminearum#unaffected_pathogenicity	56.918	1.49e-122	370
AR4307g2590	I1RE55#PHI:1616#GzssDB001#5518#Fusarium_graminearum#unaffected_pathogenicity	56.887	0	1120
AR4307g7011	I1RQU8#PHI:1714#GzZC029#5518#Fusarium_graminearum#lethal	56.879	0	537
AR4307g1861	I1S2F6#PHI:1460#GzAra008#5518#Fusarium_graminearum#unaffected_pathogenicity	56.798	3.63e-126	366
AR4307g7361	J4KMX0#PHI:7152#pmcB#176275#Beauveria_bassiana#reduced_virulence	56.783	0	1142
AR4307g7819	I1RSA6#PHI:1488#GzHMG020#5518#Fusarium_graminearum#unaffected_pathogenicity	56.753	0	1213
AR4307g8274	Q5A5P7#PHI:4891#orf19.5352#5476#Candida_albicans#unaffected_pathogenicity	56.744	4.64e-88	267
AR4307g10253	I1RCJ3#PHI:1351#GzC2H011#5518#Fusarium_graminearum#unaffected_pathogenicity	56.723	0	770
AR4307g5212	I1RW03#PHI:1679#GzMIZ001#5518#Fusarium_graminearum#unaffected_pathogenicity	56.693	7.17e-129	377
AR4307g8719	I1RJY5#PHI:1576#GzOB016#5518#Fusarium_graminearum#unaffected_pathogenicity	56.66	0	626
AR4307g12457	I1S832#PHI:1723#GzZC038#5518#Fusarium_graminearum#unaffected_pathogenicity	56.649	0	1035
AR4307g8078	J9VUY6#PHI:6871#gua1#5207#Cryptococcus_neoformans#loss_of_pathogenicity	56.643	4.14e-51	174
AR4307g9580	I1S6C7#PHI:1730#GzZC045#5518#Fusarium_graminearum#unaffected_pathogenicity	56.617	0	802
AR4307g1404	I1RFF7#PHI:1837#GzZC152#5518#Fusarium_graminearum#unaffected_pathogenicity	56.604	7.34e-93	295
AR4307g4576	I1RAH1#PHI:4658#FgHXK1#5518#Fusarium_graminearum#reduced_virulence	56.55	0	550
AR4307g12901	Q0U6E8#PHI:2249__PHI:2270#Mpd1#13684#Parastagonospora_nodorum#unaffected_pathogenicity	56.41	8.78e-149	429
AR4307g6542	A5HF03#PHI:1057#MTP1#318829#Magnaporthe_oryzae#unaffected_pathogenicity	56.399	0	557
AR4307g1998	I1S0H5#PHI:7717#FgOXP1#5518#Fusarium_graminearum#reduced_virulence	56.391	0	1472
AR4307g7580	C4YR40#PHI:4904#Glr1#5476#Candida_albicans#reduced_virulence	56.338	0	519
AR4307g1979	I1RSH6#PHI:1510#GzHOME005#5518#Fusarium_graminearum#unaffected_pathogenicity	56.333	9.3e-178	527
AR4307g5885	Q00298#PHI:69#CUTA#40559#Botrytis_cinerea#unaffected_pathogenicity	56.329	5.79e-53	170
AR4307g951	G4N3Y8#PHI:5603#FZC13#318829#Magnaporthe_oryzae#unaffected_pathogenicity	56.311	0	550
AR4307g4503	W5ZQ93#PHI:3417#Ohmm#176275#Beauveria_bassiana#increased_virulence_(hypervirulence)	56.287	0	1073
AR4307g96	E9RBG1#PHI:4230__PHI:8901#abcB__abcG1#746128#Aspergillus_fumigatus#reduced_virulence__unaffected_pathogenicity	56.267	0	1679
AR4307g9635	G4NCK1#PHI:2149#MoLDB1#318829#Magnaporthe_oryzae#reduced_virulence__loss_of_pathogenicity	56.267	2.11e-124	380
AR4307g3620	I1S7B9#PHI:1739#GzZC054#5518#Fusarium_graminearum#unaffected_pathogenicity	56.13	0	906
AR4307g2759	J9VUY6#PHI:6871#gua1#5207#Cryptococcus_neoformans#loss_of_pathogenicity	56.111	0	583
AR4307g128	I1RS11#PHI:1922#GzZC237#5518#Fusarium_graminearum#unaffected_pathogenicity	56.098	3.95e-25	102
AR4307g5321	I1RAN6#PHI:1768#GzZC083#5518#Fusarium_graminearum#unaffected_pathogenicity	56.061	4.65e-70	213
AR4307g402	Q4WJ77#PHI:7654#aroB#746128#Aspergillus_fumigatus#reduced_virulence	56.02	2.17e-149	431
AR4307g9377	I1RN20#PHI:1373#GzC2H036#5518#Fusarium_graminearum#unaffected_pathogenicity	56.012	1.63e-100	307
AR4307g202	I1RB12#PHI:1968#GzZC283#5518#Fusarium_graminearum#unaffected_pathogenicity	56	0	829
AR4307g11060	I1S1B7#PHI:1422#GzC2H090#5518#Fusarium_graminearum#reduced_virulence	55.97	5.66e-44	170
AR4307g10124	I1RBB7#PHI:1475#GzHMG007#5518#Fusarium_graminearum#unaffected_pathogenicity	55.963	0	674
AR4307g7229	G4MQW5#PHI:7320#GH18#318829#Magnaporthe_oryzae#unaffected_pathogenicity	55.919	2.78e-156	451
AR4307g9397	Q4WZP3#PHI:8875#gefA_(Afu2g16240)#746128#Aspergillus_fumigatus#unaffected_pathogenicity__loss_of_pathogenicity	55.905	0	1251
AR4307g97	I1RY88#PHI:1825#GzZC140#5518#Fusarium_graminearum#unaffected_pathogenicity	55.876	1.09e-180	522
AR4307g8021	G4NDE1#PHI:1017__PHI:2067#ABC4#318829#Magnaporthe_oryzae#reduced_virulence__loss_of_pathogenicity	55.863	0	1781
AR4307g7069	Q4WPM7#PHI:6146#HorA#746128#Aspergillus_fumigatus#reduced_virulence	55.862	1.97e-111	326
AR4307g8418	A7U5U4#PHI:2058#LHS1#318829#Magnaporthe_oryzae#reduced_virulence	55.845	0	1050
AR4307g551	T2C7K6#PHI:3226#pnl1#36651#Penicillium_digitatum#reduced_virulence	55.689	5.91e-125	367
AR4307g7955	J4US35#PHI:8673#cryD_(EJP68422)#176275#Beauveria_bassiana#unaffected_pathogenicity	55.669	0	748
AR4307g11181	I1S0H5#PHI:7717#FgOXP1#5518#Fusarium_graminearum#reduced_virulence	55.615	0	1440
AR4307g10391	I1RYE2#PHI:1459#GzAra007#5518#Fusarium_graminearum#unaffected_pathogenicity	55.556	1.71e-84	252
AR4307g6257	G4MXJ1#PHI:3162#Mohik8#318829#Magnaporthe_oryzae#loss_of_pathogenicity	55.545	0	1206
AR4307g421	Q6IVV6#PHI:547#CEL5A#40559#Botrytis_cinerea#unaffected_pathogenicity	55.482	1.16e-119	353
AR4307g4584	A0A290WFK0#PHI:7709#VEDA_05199#27337#Verticillium_dahliae#reduced_virulence__unaffected_pathogenicity	55.455	1.25e-33	129
AR4307g5673	I1RWG5#PHI:1448__PHI:2430#GzGATA006__areA#5518#Fusarium_graminearum#unaffected_pathogenicity__reduced_virulence	55.422	2.68e-23	92.8
AR4307g7551	I1RMG1#PHI:1484#GzHMG016#5518#Fusarium_graminearum#unaffected_pathogenicity	55.411	0	643
AR4307g10779	G4N740#PHI:4024#MoST1#318829#Magnaporthe_oryzae#unaffected_pathogenicity	55.319	1.24e-41	161
AR4307g7558	N4X9G3#PHI:4233#ftr1#5016#Bipolaris_maydis#reduced_virulence	55.313	1.18e-123	363
AR4307g3903	I1RVN8#PHI:1791#GzZC106#5518#Fusarium_graminearum#unaffected_pathogenicity	55.308	0	593
AR4307g12668	I1RTB7#PHI:2350#MID1#5518#Fusarium_graminearum#unaffected_pathogenicity	55.267	0	663
AR4307g3544	P0CS04#PHI:3490#Gmt2#5207#Cryptococcus_neoformans#loss_of_pathogenicity	55.247	5.29e-120	357
AR4307g8206	J5JHE8#PHI:7377#Blys4#176275#Beauveria_bassiana#unaffected_pathogenicity	55.233	6.82e-62	191
AR4307g12924	I1RRN6#PHI:1547#GzMyb011#5518#Fusarium_graminearum#unaffected_pathogenicity	55.184	1.09e-159	471
AR4307g4096	I1RUP7#PHI:1493#GzHMG025#5518#Fusarium_graminearum#unaffected_pathogenicity	55.154	0	679
AR4307g10725	Q9HF03#PHI:280#CCN1#5207#Cryptococcus_neoformans#reduced_virulence	55.12	0	721
AR4307g367	I1RDH3#PHI:1952#GzZC267#5518#Fusarium_graminearum#unaffected_pathogenicity	55.102	6.55e-60	189
AR4307g1095	G4MXR2#PHI:8753__PHI:8806#MoChia1_(MGG_08054)__MoChi1_(MGG_08054)#318829#Magnaporthe_oryzae#reduced_virulence	55.039	3.81e-144	438
AR4307g2004	I1RSF8#PHI:1682#GzNF002#5518#Fusarium_graminearum#unaffected_pathogenicity	55.024	0	585
AR4307g2331	Q4WQ27#PHI:2519#LYS9#746128#Aspergillus_fumigatus#lethal	55	3.27e-103	310
AR4307g5487	I1R9J1#PHI:1271#FGSG_00132#5518#Fusarium_graminearum#unaffected_pathogenicity	54.98	1.2e-88	270
AR4307g2197	Q4X1Y0#PHI:2514#PFS2#746128#Aspergillus_fumigatus#lethal	54.941	4.34e-177	517
AR4307g2446	Q4WBL9#PHI:4672#AmcA#746128#Aspergillus_fumigatus#unaffected_pathogenicity	54.934	2.84e-117	344
AR4307g2986	I1RFG1#PHI:1936#GzZC251#5518#Fusarium_graminearum#unaffected_pathogenicity	54.916	0	744
AR4307g9265	A0A290WH42#PHI:7707#VEDA_05197#27337#Verticillium_dahliae#reduced_virulence__unaffected_pathogenicity__increased_virulence_(hypervirulence)	54.874	7.3e-99	299
AR4307g12220	E9RBG1#PHI:4230__PHI:8901#abcB__abcG1#746128#Aspergillus_fumigatus#reduced_virulence__unaffected_pathogenicity	54.837	0	1605
AR4307g6296	J4KNV2#PHI:6644#CIA30#176275#Beauveria_bassiana#increased_virulence_(hypervirulence)	54.783	7.94e-77	233
AR4307g10254	J9W1N5#PHI:3527#PHO840#5207#Cryptococcus_neoformans#reduced_virulence	54.778	0	624
AR4307g656	Q4WLR6#PHI:7653#trpA#746128#Aspergillus_fumigatus#reduced_virulence	54.647	0	597
AR4307g7428	I1RXK9#PHI:1850#GzZC165#5518#Fusarium_graminearum#unaffected_pathogenicity	54.597	0	575
AR4307g10336	I1RKB4#PHI:1953#GzZC268#5518#Fusarium_graminearum#unaffected_pathogenicity	54.583	0	528
AR4307g5107	A0A0E0S4Y7#PHI:8646#FgLDHL2_(FGSG_16220)#5518#Fusarium_graminearum#reduced_virulence	54.545	0	527
AR4307g12961	T2C7K6#PHI:3226#pnl1#36651#Penicillium_digitatum#reduced_virulence	54.474	2.25e-124	365
AR4307g11508	I1RG07#PHI:5781#PRE2#5518#Fusarium_graminearum#unaffected_pathogenicity	54.45	4.51e-128	394
AR4307g8985	I1S2J6#PHI:9039#fgm2_(FGSG_10992)#5518#Fusarium_graminearum#reduced_virulence	54.422	2.08e-107	322
AR4307g6424	F9XNZ8#PHI:8592#ZtPpt#1047171#Zymoseptoria_tritici#loss_of_pathogenicity	54.39	1.72e-135	396
AR4307g7911	G4N170#PHI:5682#FZC78#318829#Magnaporthe_oryzae#unaffected_pathogenicity	54.382	0	816
AR4307g2222	G4N3K2#PHI:882#MGG_04985#318829#Magnaporthe_oryzae#reduced_virulence	54.375	0	630
AR4307g10182	Q4WXL8#PHI:2538#AUR1#746128#Aspergillus_fumigatus#lethal__unaffected_pathogenicity	54.342	5.5e-146	426
AR4307g1562	W7M3S4#PHI:7144#FvSCP1#117187#Fusarium_verticillioides#reduced_virulence	54.31	8.99e-116	340
AR4307g11465	I1RFN9#PHI:1656#GzYL#5518#Fusarium_graminearum#lethal	54.292	0	720
AR4307g2966	I1RRD2#PHI:1328#GzbZIP010#5518#Fusarium_graminearum#reduced_virulence	54.291	1.41e-166	499
AR4307g12499	Q4WQM5#PHI:7692#FlcA#746128#Aspergillus_fumigatus#loss_of_pathogenicity	54.24	0	765
AR4307g6526	I1RM25#PHI:1579#GzOB019#5518#Fusarium_graminearum#unaffected_pathogenicity	54.237	0	746
AR4307g2415	I1RBW7#PHI:1243#FGSG_01058#5518#Fusarium_graminearum#unaffected_pathogenicity	54.223	0	855
AR4307g10294	I1RFC7#PHI:1239#FGSG_02399#5518#Fusarium_graminearum#unaffected_pathogenicity	54.19	1.9e-125	369
AR4307g7734	Q4WWN9#PHI:2518#MET16#746128#Aspergillus_fumigatus#lethal	54.167	3.05e-124	360
AR4307g11097	W6ZBM1#PHI:4989#Ppt1#101162#Bipolaris_oryzae#reduced_virulence	54.167	1.19e-116	342
AR4307g7982	W7N2A8#PHI:3383#FVEG_12531#117187#Fusarium_verticillioides#unaffected_pathogenicity	54.167	2e-52	176
AR4307g1995	I1RSG4#PHI:1586#GzOB026#5518#Fusarium_graminearum#unaffected_pathogenicity	54.167	4.08e-49	165
AR4307g7412	I1R9K1#PHI:1991#GzZC306#5518#Fusarium_graminearum#lethal	54.143	0	691
AR4307g4485	C5P3X6#PHI:479#MEP1#199306#Coccidioides_posadasii#reduced_virulence	54.093	1.35e-98	292
AR4307g9816	A0A1D8PKM5#PHI:8896#Pem2_(C3_06570C_A)#5476#Candida_albicans#increased_virulence_(hypervirulence)	54.088	5.28e-57	181
AR4307g2831	Q5XTQ4#PHI:541#LIP1#40559#Botrytis_cinerea#unaffected_pathogenicity	54.087	0	634
AR4307g9458	A0A0E3USI9#PHI:4845#PL1332#29001#Alternaria_brassicicola#reduced_virulence	54.065	1.79e-84	253
AR4307g6067	Q4WMS3#PHI:2549#MAK5#746128#Aspergillus_fumigatus#lethal	53.984	0	578
AR4307g6439	G4YQK3#PHI:6261#PsAAT3#67593#Phytophthora_sojae#reduced_virulence	53.95	8.69e-165	473
AR4307g4381	I1RH65#PHI:7650#FgPR-IL-3#5518#Fusarium_graminearum#unaffected_pathogenicity	53.947	1.78e-54	177
AR4307g10696	I1RU19#PHI:1886#GzZC201#5518#Fusarium_graminearum#unaffected_pathogenicity	53.938	6.68e-152	443
AR4307g2672	B0XVF7#PHI:2292#aoxA#746128#Aspergillus_fumigatus#unaffected_pathogenicity	53.936	9.11e-126	368
AR4307g3968	Q8Y1E7#PHI:8885#aroG2#305#Ralstonia_solanacearum#unaffected_pathogenicity__loss_of_pathogenicity	53.89	2.33e-117	366
AR4307g11934	G4MR33#PHI:6396#MoMNR2#318829#Magnaporthe_oryzae#reduced_virulence	53.874	0	774
AR4307g2403	I1S4X3#PHI:1843#GzZC158#5518#Fusarium_graminearum#unaffected_pathogenicity	53.83	0	908
AR4307g6365	G4N7K5#PHI:3062#MoRga2#318829#Magnaporthe_oryzae#unaffected_pathogenicity	53.808	0	660
AR4307g9562	W7N2B4#PHI:3381#FVEG_12533#117187#Fusarium_verticillioides#unaffected_pathogenicity	53.782	1.27e-163	479
AR4307g7421	I1RER0#PHI:5860#GCD8#5518#Fusarium_graminearum#unaffected_pathogenicity	53.776	1.36e-157	454
AR4307g6895	I1RNR1#PHI:1896#GzZC211#5518#Fusarium_graminearum#unaffected_pathogenicity	53.769	0	633
AR4307g8858	Q99324#PHI:191#TOM1#39703#Septoria_lycopersici#unaffected_pathogenicity	53.737	0	815
AR4307g11913	G4MSF9#PHI:8754#MoPer1_(MGG_04527)#318829#Magnaporthe_oryzae#reduced_virulence	53.644	6.02e-128	372
AR4307g6757	J9VNZ8#PHI:3528#PHO89#5207#Cryptococcus_neoformans#reduced_virulence	53.642	9.69e-51	173
AR4307g8231	I1RPX8#PHI:1581#GzOB021#5518#Fusarium_graminearum#unaffected_pathogenicity	53.64	2.16e-96	291
AR4307g10948	Q4WQI8#PHI:4603#KexB#746128#Aspergillus_fumigatus#reduced_virulence	53.63	0	897
AR4307g3940	Q0QWD8#PHI:598#THIOL#5022#Leptosphaeria_maculans#reduced_virulence	53.6	5.6e-129	379
AR4307g4246	J4KMX0#PHI:7152#pmcB#176275#Beauveria_bassiana#reduced_virulence	53.581	0	1115
AR4307g6285	I1RTJ6#PHI:1389#GzC2H052#5518#Fusarium_graminearum#lethal	53.576	0	791
AR4307g12338	A0A076ZMY5#PHI:7520#VK055_1952#573#Klebsiella_pneumoniae#unaffected_pathogenicity	53.527	4.14e-158	461
AR4307g8000	Q9X4G0#PHI:5042#hmgA#287#Pseudomonas_aeruginosa#increased_virulence_(hypervirulence)__reduced_virulence	53.521	4.81e-145	424
AR4307g12186	E9R863#PHI:5267#UgeB#162425#Aspergillus_nidulans#increased_virulence_(hypervirulence)	53.488	1.79e-147	429
AR4307g10069	I1RAT9#PHI:1985#GzZC300#5518#Fusarium_graminearum#unaffected_pathogenicity	53.469	0	781
AR4307g6174	N4X9G3#PHI:4233#ftr1#5016#Bipolaris_maydis#reduced_virulence	53.468	4.48e-114	337
AR4307g11879	P40086#PHI:503#COX15#4932#Saccharomyces_cerevisiae#reduced_virulence	53.439	4.74e-135	400
AR4307g11631	G4MS58#PHI:881#MGG_04556#318829#Magnaporthe_oryzae#reduced_virulence	53.412	9.06e-126	366
AR4307g9939	G4MV25#PHI:6711#gel1#318829#Magnaporthe_oryzae#unaffected_pathogenicity__loss_of_pathogenicity	53.407	2.12e-165	476
AR4307g10118	I1S4R6#PHI:1501#GzHMG033#5518#Fusarium_graminearum#unaffected_pathogenicity	53.407	6.87e-122	372
AR4307g3126	I1R9P3#PHI:1995#GzZC310#5518#Fusarium_graminearum#unaffected_pathogenicity	53.378	8.91e-147	451
AR4307g3820	Q8MPM3#PHI:8028#Tkt#5665#Leishmania_mexicana#loss_of_pathogenicity	53.374	0	712
AR4307g11107	G4NGA7#PHI:2032#VTL1#318829#Magnaporthe_oryzae#unaffected_pathogenicity	53.372	0	588
AR4307g2623	Q96VL3#PHI:339#CLPT1#290576#Colletotrichum_lindemuthianum#reduced_virulence	53.363	9.48e-77	238
AR4307g1301	O13401#PHI:401#SOD2#5476#Candida_albicans#unaffected_pathogenicity	53.333	3.08e-78	237
AR4307g1903	E9R863#PHI:5267#UgeB#162425#Aspergillus_nidulans#increased_virulence_(hypervirulence)	53.301	9.95e-149	432
AR4307g6027	I1S462#PHI:1336#GzbZIP018#5518#Fusarium_graminearum#unaffected_pathogenicity	53.167	1.96e-129	383
AR4307g2402	G4MQB0#PHI:3066#MoRga6#318829#Magnaporthe_oryzae#unaffected_pathogenicity	53.128	0	928
AR4307g11409	I1RDZ2#PHI:5809#Fgsg01861#5518#Fusarium_graminearum#unaffected_pathogenicity	53.066	8.91e-141	420
AR4307g9727	Q8J214#PHI:346#CRU1#5270#Ustilago_maydis#reduced_virulence	53.045	1.03e-170	509
AR4307g2148	P87199#PHI:465#KIN2#5270#Ustilago_maydis#reduced_virulence	53.012	0	972
AR4307g1735	I1RDG6#PHI:1555#GzMyb019#5518#Fusarium_graminearum#unaffected_pathogenicity	52.953	0	558
AR4307g4319	J4KLZ9#PHI:7155#pmr1#176275#Beauveria_bassiana#reduced_virulence	52.949	0	807
AR4307g5306	Q4WHA4#PHI:7694#FlcC#746128#Aspergillus_fumigatus#loss_of_pathogenicity	52.932	0	656
AR4307g11226	G4ND25#PHI:2488#Man1#318829#Magnaporthe_oryzae#unaffected_pathogenicity	52.93	4.88e-179	517
AR4307g7346	I1RHV1#PHI:6123__PHI:5715#FGSG_03366__ScOrtholog_PHO12#5518#Fusarium_graminearum#reduced_virulence__unaffected_pathogenicity	52.903	6.87e-175	507
AR4307g1190	J4UPL6#PHI:5394#mas5#176275#Beauveria_bassiana#loss_of_pathogenicity	52.874	1.82e-17	81.6
AR4307g12325	Q5AG40#PHI:2553#VPS4#5476#Candida_albicans#loss_of_pathogenicity	52.761	1.03e-113	356
AR4307g3918	I1S2J9#PHI:3924__PHI:8224__PHI:9036#FgABC1__Fg10995__fgm5_(FGSG_10995)#5518#Fusarium_graminearum#reduced_virulence	52.753	0	1490
AR4307g1383	I1RXS2#PHI:1759#GzZC074#5518#Fusarium_graminearum#unaffected_pathogenicity	52.742	0	639
AR4307g3457	Q1L5B8#PHI:2055#PPT1#31870#Colletotrichum_graminicola#loss_of_pathogenicity	52.716	3.65e-102	303
AR4307g9891	G4N5N0#PHI:5441#ABA_GPCR#318829#Magnaporthe_oryzae#unaffected_pathogenicity	52.677	0	589
AR4307g361	Q32WF7#PHI:2269#Mdh1#13684#Parastagonospora_nodorum#unaffected_pathogenicity	52.672	3.57e-87	263
AR4307g4823	Q4JEX9#PHI:825#SE#5551#Trichophyton_rubrum#chemistry_target:_resistance_to_chemical	52.664	1.61e-177	510
AR4307g4821	Q00049#PHI:7768#NorA_(AflE)#5059#Aspergillus_flavus#reduced_virulence	52.646	2.05e-132	386
AR4307g682	G4N3D8#PHI:5622#FZC28#318829#Magnaporthe_oryzae#unaffected_pathogenicity	52.638	0	790
AR4307g8571	I1S0U2#PHI:1651#GzWing023#5518#Fusarium_graminearum#unaffected_pathogenicity	52.632	5.8e-159	457
AR4307g12242	Q00049#PHI:7768#NorA_(AflE)#5059#Aspergillus_flavus#reduced_virulence	52.616	1.59e-122	374
AR4307g348	G4NGH0#PHI:4489#C3HC#318829#Magnaporthe_oryzae#reduced_virulence	52.602	5.1e-172	498
AR4307g5715	I1S054#PHI:1854#GzZC169#5518#Fusarium_graminearum#unaffected_pathogenicity	52.57	0	705
AR4307g9114	G4MRQ6#PHI:801__PHI:8650#MGG_04621__Poyth1_(MGG_04621)#318829#Magnaporthe_oryzae#reduced_virulence	52.522	2.35e-178	523
AR4307g2779	U3PW09#PHI:7047#Aqp1#5207#Cryptococcus_neoformans#unaffected_pathogenicity	52.521	9.27e-77	248
AR4307g10315	W7MNK7#PHI:7147#FvPEX14#117187#Fusarium_verticillioides#unaffected_pathogenicity	52.513	1.37e-126	372
AR4307g12748	Q51UJ9#PHI:2085#Moatg11#318829#Magnaporthe_oryzae#unaffected_pathogenicity	52.502	0	1381
AR4307g4151	D0ERY7#PHI:2202__PHI:7327#PdeH__MopdeH#318829#Magnaporthe_oryzae#reduced_virulence__loss_of_pathogenicity	52.495	0	913
AR4307g8660	G4NFA2#PHI:8538#MoSNF7_(MGG_04174)#318829#Magnaporthe_oryzae#reduced_virulence	52.495	4.21e-140	414
AR4307g12643	P29138#PHI:4615#Pr1#5530#Metarhizium_anisopliae#unaffected_pathogenicity	52.455	4.52e-146	422
AR4307g7525	P42375#PHI:3085#GroEL#837#Porphyromonas_gingivalis#increased_virulence_(hypervirulence)	52.453	0	535
AR4307g11086	Q0V515#PHI:3914#Sdh1#13684#Parastagonospora_nodorum#reduced_virulence	52.427	7.02e-34	122
AR4307g8599	Q9P8L8#PHI:544#BCMFS1#40559#Botrytis_cinerea#unaffected_pathogenicity	52.381	0	648
AR4307g2437	I1RBU9#PHI:1557#GzNH002#5518#Fusarium_graminearum#unaffected_pathogenicity	52.361	1.19e-144	424
AR4307g220	G4NFU3#PHI:2103#MGG_08710.5#318829#Magnaporthe_oryzae#unaffected_pathogenicity	52.344	1.13e-152	480
AR4307g5295	Q9C2Y4#PHI:405#PDE1#318829#Magnaporthe_oryzae#reduced_virulence	52.319	0	1464
AR4307g2278	G4MPI2#PHI:2009#HOS4#318829#Magnaporthe_oryzae#unaffected_pathogenicity	52.312	4.57e-108	377
AR4307g12846	G4N6T1#PHI:5671#FZC68#318829#Magnaporthe_oryzae#unaffected_pathogenicity	52.3	0	639
AR4307g6600	P0A1D7#PHI:3040#ClpP#28901#Salmonella_enterica#reduced_virulence	52.299	3.03e-61	194
AR4307g9711	B0XUP5#PHI:3238#ctrC#746128#Aspergillus_fumigatus#unaffected_pathogenicity	52.284	1.64e-58	186
AR4307g9447	G4N3U4#PHI:5188#MoHPX1#318829#Magnaporthe_oryzae#reduced_virulence	52.284	2.54e-53	176
AR4307g11332	Q51WZ9#PHI:2066__PHI:2077__PHI:8264#MgAtg9__Moatg9__atg9#318829__5518#Magnaporthe_oryzae__Fusarium_graminearum#loss_of_pathogenicity__unaffected_pathogenicity	52.273	0	959
AR4307g4125	Q59UR2#PHI:6214#MNN10#5476#Candida_albicans#reduced_virulence__unaffected_pathogenicity	52.265	3.67e-103	326
AR4307g5878	Q59M50#PHI:2562#Cwt1#5476#Candida_albicans#reduced_virulence	52.133	2.41e-69	244
AR4307g3044	Q6QIY0#PHI:2382#Upa2#5270#Ustilago_maydis#unaffected_pathogenicity	52.121	1.02e-116	342
AR4307g508	D2E9W8#PHI:2377#DEP3#29001#Alternaria_brassicicola#reduced_virulence__unaffected_pathogenicity	52.102	0	543
AR4307g7567	G4MRI4#PHI:810#MGG_02436#318829#Magnaporthe_oryzae#reduced_virulence	52.083	1.6e-22	87.8
AR4307g10593	W7N2A8#PHI:3383#FVEG_12531#117187#Fusarium_verticillioides#unaffected_pathogenicity	52.066	5.72e-131	383
AR4307g12099	G4MPJ4#PHI:4053#Pax1#318829#Magnaporthe_oryzae#loss_of_pathogenicity	52.065	0	800
AR4307g6468	I1RKP6#PHI:1926#GzZC241#5518#Fusarium_graminearum#unaffected_pathogenicity	52.06	1.55e-139	413
AR4307g8547	I1RL06#PHI:3697__PHI:3925#FgABC1__FgABC3#5518#Fusarium_graminearum#reduced_virulence	52.055	0	694
AR4307g1063	E9RBG1#PHI:4230__PHI:8901#abcB__abcG1#746128#Aspergillus_fumigatus#reduced_virulence__unaffected_pathogenicity	52.017	0	708
AR4307g9768	G4MZ98#PHI:5186#MoAPX2#318829#Magnaporthe_oryzae#reduced_virulence	52.008	0	566
AR4307g8167	G4NKL4#PHI:3063#MoRga3#318829#Magnaporthe_oryzae#unaffected_pathogenicity	52.005	0	736
AR4307g8962	O60034#PHI:1030#bcatrA#40559#Botrytis_cinerea#unaffected_pathogenicity	51.984	0	1509
AR4307g12500	J5JPY5#PHI:5054#wetA#176275#Beauveria_bassiana#reduced_virulence	51.923	9.49e-42	157
AR4307g10357	I1RK97#PHI:1368#GzC2H029#5518#Fusarium_graminearum#unaffected_pathogenicity	51.913	1.47e-113	338
AR4307g1277	C5BF98#PHI:2959#mdh#67780#Edwardsiella_ictaluri#reduced_virulence	51.911	6.19e-92	279
AR4307g5695	I1RPX8#PHI:1581#GzOB021#5518#Fusarium_graminearum#unaffected_pathogenicity	51.908	3.26e-93	282
AR4307g3231	I1RFM6#PHI:744#ADE5#5518#Fusarium_graminearum#reduced_virulence	51.869	9.03e-136	411
AR4307g8498	I1RM25#PHI:1579#GzOB019#5518#Fusarium_graminearum#unaffected_pathogenicity	51.863	0	671
AR4307g6039	G5EHL4#PHI:9054#MoMCP1#318829#Magnaporthe_oryzae#reduced_virulence	51.852	1.05e-62	200
AR4307g8191	P52498#PHI:62#caRSR1#5476#Candida_albicans#reduced_virulence	51.786	1.46e-56	184
AR4307g475	I1S584#PHI:1687#GzZC002#5518#Fusarium_graminearum#unaffected_pathogenicity	51.739	0	675
AR4307g8353	U3MXJ8#PHI:3039#MoSPA2#318829#Magnaporthe_oryzae#unaffected_pathogenicity	51.735	0	834
AR4307g10483	Q6IVV6#PHI:547#CEL5A#40559#Botrytis_cinerea#unaffected_pathogenicity	51.645	2.97e-111	334
AR4307g7677	G4N983#PHI:2215#BIM1#318829#Magnaporthe_oryzae#reduced_virulence	51.585	0	2034
AR4307g3084	I1RXH8#PHI:1513#GzHOME011#5518#Fusarium_graminearum#unaffected_pathogenicity	51.579	3.23e-57	192
AR4307g6104	I1S9F6#PHI:5842#Fgsg13487#5518#Fusarium_graminearum#unaffected_pathogenicity	51.57	6.85e-155	449
AR4307g2583	I1RE60#PHI:1481#GzHMG013#5518#Fusarium_graminearum#unaffected_pathogenicity	51.566	3.72e-113	366
AR4307g5598	Q2VLJ1#PHI:716#ZEB1#5518#Fusarium_graminearum#unaffected_pathogenicity	51.542	1.31e-168	489
AR4307g1539	I1RIC0#PHI:1947#GzZC262#5518#Fusarium_graminearum#unaffected_pathogenicity	51.523	0	840
AR4307g1130	J9VSX1#PHI:7186#ADE13#5207#Cryptococcus_neoformans#reduced_virulence	51.522	2.48e-144	438
AR4307g12108	B2SI02#PHI:1139#raxQ#347#Xanthomonas_oryzae#increased_virulence_(hypervirulence)	51.515	8.44e-61	200
AR4307g5368	Q0PND3#PHI:2031#TGL3-2#318829#Magnaporthe_oryzae#unaffected_pathogenicity	51.435	6.97e-146	434
AR4307g9927	G4N027#PHI:2169#MGG_06188.6#318829#Magnaporthe_oryzae#reduced_virulence	51.41	1.4e-137	407
AR4307g8642	A6RSE2#PHI:7159#bcelp4#40559#Botrytis_cinerea#reduced_virulence	51.397	1.64e-47	160
AR4307g9599	I1S8F7#PHI:1820#GzZC135#5518#Fusarium_graminearum#unaffected_pathogenicity	51.389	2.63e-19	78.6
AR4307g2203	G4N054#PHI:2018__PHI:2106#MoPLC2__MGG_05332.5#318829#Magnaporthe_oryzae#loss_of_pathogenicity__reduced_virulence	51.344	0	658
AR4307g3799	I1S0H5#PHI:7717#FgOXP1#5518#Fusarium_graminearum#reduced_virulence	51.325	0	1309
AR4307g11411	I1S8Y4#PHI:1338#GzbZIP020#5518#Fusarium_graminearum#unaffected_pathogenicity	51.307	8.3e-90	271
AR4307g8616	B0YCA2#PHI:7121#tslA#746128#Aspergillus_fumigatus#increased_virulence_(hypervirulence)	51.302	0	924
AR4307g8504	I1S2A9#PHI:1784#GzZC099#5518#Fusarium_graminearum#unaffected_pathogenicity	51.293	9.17e-156	452
AR4307g7008	Q9X4G0#PHI:5042#hmgA#287#Pseudomonas_aeruginosa#increased_virulence_(hypervirulence)__reduced_virulence	51.259	4.45e-132	390
AR4307g296	I1RYC6#PHI:1824#GzZC139#5518#Fusarium_graminearum#unaffected_pathogenicity	51.24	7.9e-74	252
AR4307g1409	I1RLI4#PHI:1979#GzZC294#5518#Fusarium_graminearum#unaffected_pathogenicity	51.227	0	560
AR4307g4225	Q6FJF0#PHI:2561#Crz1#5478#Candida_glabrata#reduced_virulence	51.22	2.77e-23	100
AR4307g1239	Q96VU5#PHI:387#UGD1#5207#Cryptococcus_neoformans#loss_of_pathogenicity	51.183	4.03e-157	461
AR4307g7422	Q8NJQ2#PHI:2839#RED1#5016#Bipolaris_maydis#reduced_virulence	51.156	5.47e-122	357
AR4307g3040	Q9P470#PHI:257#GAS2#318829#Magnaporthe_oryzae#reduced_virulence	51.133	2.4e-93	281
AR4307g11853	G4N6W1#PHI:5659#FZC61#318829#Magnaporthe_oryzae#unaffected_pathogenicity	51.099	0	617
AR4307g11974	G4MRP7#PHI:803#MGG_04629#318829#Magnaporthe_oryzae#reduced_virulence	51.098	0	1069
AR4307g6648	I1S2R1#PHI:1423#GzC2H091#5518#Fusarium_graminearum#unaffected_pathogenicity	51.087	8.17e-23	97.1
AR4307g2270	X5FD66#PHI:4525#PFP1#914237#Rhynchosporium_commune#reduced_virulence	51.073	0	1092
AR4307g8749	Q0V515#PHI:3914#Sdh1#13684#Parastagonospora_nodorum#reduced_virulence	51.029	3.16e-169	493
AR4307g9289	I1RXB2#PHI:1769#GzZC084#5518#Fusarium_graminearum#unaffected_pathogenicity	51.02	9.82e-20	84.3
AR4307g1636	I1RP88#PHI:1226#FGSG_05845#5518#Fusarium_graminearum#lethal	50.959	4.12e-97	302
AR4307g10617	I1RIY9#PHI:1981#GzZC296#5518#Fusarium_graminearum#unaffected_pathogenicity	50.94	0	624
AR4307g4879	G4NIP2#PHI:783__PHI:2068#MGG_04163__DES1#318829#Magnaporthe_oryzae#reduced_virulence	50.905	0	1067
AR4307g4913	G4YQK3#PHI:6261#PsAAT3#67593#Phytophthora_sojae#reduced_virulence	50.862	6.29e-127	374
AR4307g1922	A0A1D8PKX3#PHI:8905#VMA6#5476#Candida_albicans#reduced_virulence	50.82	1.41e-123	362
AR4307g9238	G4NGW7#PHI:3067#MoRga7#318829#Magnaporthe_oryzae#unaffected_pathogenicity	50.808	4.63e-111	370
AR4307g10702	I1RUC7#PHI:1260#FGSG_07816#5518#Fusarium_graminearum#unaffected_pathogenicity	50.785	4.19e-38	139
AR4307g11262	G4MV34#PHI:8049#Siz1#318829#Magnaporthe_oryzae#reduced_virulence	50.765	1.67e-119	365
AR4307g3994	J9VMW8#PHI:3457#PHO84#5207#Cryptococcus_neoformans#reduced_virulence	50.707	0	539
AR4307g10219	I1RL97#PHI:1862#GzZC177#5518#Fusarium_graminearum#unaffected_pathogenicity	50.697	0	544
AR4307g6632	G4MKH9#PHI:3310#Mocod1#318829#Magnaporthe_oryzae#reduced_virulence	50.645	0	608
AR4307g6129	O13289#PHI:106__PHI:7209#CAT1__cat1#5476#Candida_albicans#reduced_virulence__unaffected_pathogenicity	50.633	1.51e-45	158
AR4307g8067	G4NC32#PHI:4492#RanBP#318829#Magnaporthe_oryzae#loss_of_pathogenicity	50.623	0	562
AR4307g6979	A0A1C3YJ97#PHI:5796#Fgsg02569#5518#Fusarium_graminearum#unaffected_pathogenicity	50.595	5.45e-53	175
AR4307g5973	I1RQI0#PHI:1975#GzZC290#5518#Fusarium_graminearum#unaffected_pathogenicity	50.564	3.33e-141	417
AR4307g4043	A0A098DM90#PHI:5864#GCD12#5518#Fusarium_graminearum#unaffected_pathogenicity	50.554	2.81e-156	453
AR4307g11375	Q5ANA8#PHI:6795#CaMCA1#5476#Candida_albicans#reduced_virulence	50.524	4.89e-118	357
AR4307g12769	A0A290WI18#PHI:7706#VEDA_05196#27337#Verticillium_dahliae#reduced_virulence__unaffected_pathogenicity__increased_virulence_(hypervirulence)	50.515	1.91e-176	513
AR4307g12406	Q520U5#PHI:2082#Moatg16#318829#Magnaporthe_oryzae#loss_of_pathogenicity	50.49	3.06e-64	199
AR4307g4588	Q9C1F9#PHI:566#cel2#5017#Bipolaris_zeicola#unaffected_pathogenicity	50.474	1.51e-144	422
AR4307g2329	Q59P00#PHI:2558#DUR31#5476#Candida_albicans#reduced_virulence	50.469	3.21e-172	500
AR4307g5769	I1RA39#PHI:1205#(Sc_CDC15)#5518#Fusarium_graminearum#reduced_virulence	50.424	0	615
AR4307g10735	Q6X269#PHI:338#CLB2#5270#Ustilago_maydis#reduced_virulence	50.373	8.85e-94	298
AR4307g7127	A0A098DTB5#PHI:5802#PRE1#5518#Fusarium_graminearum#unaffected_pathogenicity	50.352	0	533
AR4307g6419	G4N6P2#PHI:5366#MoSyn8#318829#Magnaporthe_oryzae#reduced_virulence	50.35	5.62e-87	262
AR4307g10949	G4MQZ2#PHI:2038#Mir1#318829#Magnaporthe_oryzae#unaffected_pathogenicity	50.323	2.84e-82	253
AR4307g11294	Q5ABG1#PHI:2825#SET1#5476#Candida_albicans#reduced_virulence	50.316	5.75e-83	293
AR4307g10318	Q4WKJ9#PHI:2546#BRX1#746128#Aspergillus_fumigatus#lethal	50.314	4.63e-97	293
AR4307g12923	G4NE79#PHI:6928#MoBRE1#318829#Magnaporthe_oryzae#reduced_virulence	50.278	0	717
AR4307g2358	O59928#PHI:144#CHT42#29875#Trichoderma_virens#reduced_virulence	50.251	3.95e-137	404
AR4307g9750	G4MYT5#PHI:3485#MoSPC3#318829#Magnaporthe_oryzae#unaffected_pathogenicity	50.202	4.19e-64	208
AR4307g7255	Q4WWT7#PHI:4896#aspE#746128#Aspergillus_fumigatus#unaffected_pathogenicity	50.191	4.44e-156	459
AR4307g2943	D0ERY8#PHI:2201__PHI:7328#PdeL__MopdeL#318829#Magnaporthe_oryzae#unaffected_pathogenicity__loss_of_pathogenicity__reduced_virulence	50.175	5.41e-179	517
AR4307g11602	Q5A679#PHI:4906#Gyp1#5476#Candida_albicans#reduced_virulence	50.127	2.2e-117	362
AR4307g11515	G4MRB0#PHI:815#MGG_04685#318829#Magnaporthe_oryzae#reduced_virulence	50.124	0	639
AR4307g5003	I1RKB4#PHI:1953#GzZC268#5518#Fusarium_graminearum#unaffected_pathogenicity	50.12	5.26e-143	419
AR4307g11803	G5EHD3#PHI:3014#MoAND1#318829#Magnaporthe_oryzae#reduced_virulence	50.112	0	1071
AR4307g1641	Q5ANA8#PHI:6795#CaMCA1#5476#Candida_albicans#reduced_virulence	50.108	9.85e-130	385
AR4307g6245	G4MS03#PHI:2006__PHI:2008#HST1#318829#Magnaporthe_oryzae#unaffected_pathogenicity	50.095	2.05e-169	492
AR4307g6741	J7MF98#PHI:2700#lac2#5465#Colletotrichum_orbiculare#reduced_virulence	50.086	0	612
AR4307g3951	C5BAT0#PHI:2961#gcvP#67780#Edwardsiella_ictaluri#reduced_virulence	50.05	0	918
AR4307g7218	Q2VLJ1#PHI:716#ZEB1#5518#Fusarium_graminearum#unaffected_pathogenicity	50	0	580
AR4307g1094	A0A1C3YL50#PHI:5839#Fgsg07489#5518#Fusarium_graminearum#unaffected_pathogenicity	50	2.7e-97	293
AR4307g2516	G4MRS8#PHI:816#MGG_04582#318829#Magnaporthe_oryzae#reduced_virulence	50	1.78e-89	288
AR4307g58	I1RF11#PHI:5874#Fgsg02274#5518#Fusarium_graminearum#unaffected_pathogenicity	50	4.73e-79	243
AR4307g5602	Q00845#PHI:180#PELD#140110#Nectria_haematococca#reduced_virulence	50	1.66e-57	187
AR4307g11413	I1RK21#PHI:1559#GzNEG001#5518#Fusarium_graminearum#unaffected_pathogenicity	50	1.75e-43	144
AR4307g7488	Q1XEW2#PHI:6963#cipC#746128#Aspergillus_fumigatus#reduced_virulence	50	3.59e-31	108
AR4307g4481	I1RGG4#PHI:1713#GzZC028#5518#Fusarium_graminearum#unaffected_pathogenicity	50	8.04e-15	70.1
AR4307g1796	I1S053#PHI:1772#GzZC087#5518#Fusarium_graminearum#reduced_virulence	50	2.01e-13	63.5
AR4307g10399	Q8RP09#PHI:981#hopI1#317#Pseudomonas_syringae#effector_(plant_avirulence_determinant)	50	2.94e-12	66.6
AR4307g1701	Q4X0M4#PHI:2527#SEC31#746128#Aspergillus_fumigatus#lethal__loss_of_pathogenicity	49.962	0	1187
AR4307g4710	G4ZHR2#PHI:6868#PsXEG1#67593#Phytophthora_sojae#effector_(plant_avirulence_determinant)	49.772	1.03e-66	208
AR4307g9987	Q5KN74#PHI:7207#msh2#5207#Cryptococcus_neoformans#unaffected_pathogenicity	49.732	0	871
AR4307g4896	I1RJE6#PHI:5790#Fgsg03962#5518#Fusarium_graminearum#unaffected_pathogenicity	49.691	1.59e-112	341
AR4307g11270	I1RFN6#PHI:1305#GzbHLH006#5518#Fusarium_graminearum#unaffected_pathogenicity	49.682	1.88e-64	216
AR4307g2713	I1RZL9#PHI:1497#GzHMG029#5518#Fusarium_graminearum#reduced_virulence	49.648	2.66e-147	437
AR4307g5298	G4NEF1#PHI:805#MGG_00124#318829#Magnaporthe_oryzae#reduced_virulence	49.591	1.51e-171	527
AR4307g8056	G4NC26#PHI:2080#Moatg13#318829#Magnaporthe_oryzae#reduced_virulence	49.584	0	714
AR4307g7176	G4MT75#PHI:3312#gta1#318829#Magnaporthe_oryzae#reduced_virulence	49.526	0	644
AR4307g9269	I1RCV8#PHI:5786#Fgsg01440#5518#Fusarium_graminearum#unaffected_pathogenicity	49.524	5.62e-59	189
AR4307g3475	I1RWV5#PHI:1746#GzZC061#5518#Fusarium_graminearum#unaffected_pathogenicity	49.522	0	865
AR4307g7965	I1RX03#PHI:3985#FGSG_08844_(Sc_gpi7)#5518#Fusarium_graminearum#unaffected_pathogenicity	49.495	0	624
AR4307g2489	A0A1C3YI15#PHI:5833#Fgsg00994#5518#Fusarium_graminearum#unaffected_pathogenicity	49.471	3.55e-126	370
AR4307g3866	I1RHR0#PHI:1904#GzZC219#5518#Fusarium_graminearum#unaffected_pathogenicity	49.435	0	637
AR4307g6469	B0JFC8#PHI:2304#BCFHG1#40559#Botrytis_cinerea#unaffected_pathogenicity	49.406	4.32e-135	396
AR4307g8531	I1RP23#PHI:1834#GzZC149#5518#Fusarium_graminearum#unaffected_pathogenicity	49.398	0	570
AR4307g4434	I1RMA5#PHI:4041#spt3#5518#Fusarium_graminearum#reduced_virulence	49.359	3.4e-85	275
AR4307g963	I1RTU2#PHI:1872#GzZC187#5518#Fusarium_graminearum#lethal	49.351	8.55e-120	358
AR4307g4526	I1RH59#PHI:1925#GzZC240#5518#Fusarium_graminearum#unaffected_pathogenicity	49.315	0	628
AR4307g11728	O93806#PHI:174#GNA1#5476#Candida_albicans#reduced_virulence	49.315	4.16e-46	149
AR4307g9527	I1RHZ0#PHI:5836#Fgsg03409#5518#Fusarium_graminearum#unaffected_pathogenicity	49.306	3.49e-27	103
AR4307g4697	G4NFA4#PHI:6392#CDA3#318829#Magnaporthe_oryzae#unaffected_pathogenicity	49.264	0	750
AR4307g6595	Q6TDT0#PHI:420#SOD2#552467#Cryptococcus_gattii_vgiii#loss_of_pathogenicity	49.239	5.74e-65	202
AR4307g7214	Q5XTQ4#PHI:541#LIP1#40559#Botrytis_cinerea#unaffected_pathogenicity	49.231	1.22e-10	60.8
AR4307g9489	I1RHQ1#PHI:7651#FgPR-IL-4#5518#Fusarium_graminearum#reduced_virulence	49.219	1.88e-64	202
AR4307g4042	Q2VLJ1#PHI:716#ZEB1#5518#Fusarium_graminearum#unaffected_pathogenicity	49.189	0	553
AR4307g4625	G7TM01#PHI:2964#AsnB#347#Xanthomonas_oryzae#reduced_virulence	49.189	6.1e-167	491
AR4307g363	Q0UA24#PHI:2256#Xdh1#13684#Parastagonospora_nodorum#unaffected_pathogenicity	49.176	2.61e-124	364
AR4307g1534	Q5XTQ4#PHI:541#LIP1#40559#Botrytis_cinerea#unaffected_pathogenicity	49.171	0	535
AR4307g7574	Q00368#PHI:27#CAP20#474922#Colletotrichum_gloeosporioides#loss_of_pathogenicity	49.162	9.19e-61	189
AR4307g10222	Q4WQM5#PHI:7692#FlcA#746128#Aspergillus_fumigatus#loss_of_pathogenicity	49.14	0	660
AR4307g397	F9XJV5#PHI:2441#MgAlg2#1047171#Zymoseptoria_tritici#loss_of_pathogenicity	49.103	5.23e-138	409
AR4307g12198	Q4WF54#PHI:2322#SidH#746128#Aspergillus_fumigatus#reduced_virulence	49.097	7.09e-87	262
AR4307g7414	W7N2A8#PHI:3383#FVEG_12531#117187#Fusarium_verticillioides#unaffected_pathogenicity	49.077	1.71e-124	367
AR4307g8661	G4NFA1#PHI:6930#MoRAD18#318829#Magnaporthe_oryzae#unaffected_pathogenicity	49.074	2.15e-120	363
AR4307g10136	C4YGV6#PHI:3370#vph1#5476#Candida_albicans#reduced_virulence	49.063	0	807
AR4307g597	I1RHQ1#PHI:7651#FgPR-IL-4#5518#Fusarium_graminearum#reduced_virulence	49.057	1.27e-44	149
AR4307g2576	Q4X1B0#PHI:6444#Complex_I_NADH_oxidoredutase#746128#Aspergillus_fumigatus#reduced_virulence	49.012	4.89e-64	201
AR4307g3890	I1RYV5#PHI:1514#GzHOME012#5518#Fusarium_graminearum#unaffected_pathogenicity	48.966	2.89e-65	223
AR4307g5733	Q2LK92#PHI:548__PHI:2305#BcPIC5__BcFKBP12#40559#Botrytis_cinerea#reduced_virulence__unaffected_pathogenicity__increased_virulence_(hypervirulence)	48.958	4.41e-23	91.7
AR4307g12541	I1RHS3#PHI:5852#Fgsg03336#5518#Fusarium_graminearum#unaffected_pathogenicity	48.958	3.73e-20	82
AR4307g753	G4ND25#PHI:2488#Man1#318829#Magnaporthe_oryzae#unaffected_pathogenicity	48.932	4.09e-147	447
AR4307g5139	Q874K8#PHI:286#CLC-A#5207#Cryptococcus_neoformans#reduced_virulence	48.923	0	736
AR4307g156	Q4W9X3#PHI:3275#fhpA#746128#Aspergillus_fumigatus#unaffected_pathogenicity	48.916	3.87e-144	421
AR4307g5987	I1RV04#PHI:1814#GzZC129#5518#Fusarium_graminearum#lethal	48.905	8.08e-167	509
AR4307g1535	E0SB00#PHI:8580#purL_(Dda3937_03379)#204038#Dickeya_dadantii#reduced_virulence	48.9	0	1233
AR4307g12129	Q4I1J3#PHI:1677#GzDHHC005#5518#Fusarium_graminearum#unaffected_pathogenicity	48.9	1.32e-145	425
AR4307g1431	I1S4E2#PHI:1737#GzZC052#5518#Fusarium_graminearum#unaffected_pathogenicity	48.876	2.87e-154	483
AR4307g8667	P04173#PHI:504#LEU2#4932#Saccharomyces_cerevisiae#reduced_virulence	48.8	1.54e-114	340
AR4307g122	Q99324#PHI:191#TOM1#39703#Septoria_lycopersici#unaffected_pathogenicity	48.78	1.08e-12	69.3
AR4307g780	W7N2B4#PHI:3381#FVEG_12533#117187#Fusarium_verticillioides#unaffected_pathogenicity	48.713	1.03e-164	482
AR4307g9886	J9VJS8#PHI:3098#URA4#5207#Cryptococcus_neoformans#reduced_virulence	48.711	2.13e-107	320
AR4307g10576	A0A290WFC9#PHI:7708#VEDA_05198#27337#Verticillium_dahliae#reduced_virulence__unaffected_pathogenicity__increased_virulence_(hypervirulence)	48.649	4.18e-103	308
AR4307g12106	I1RCK8#PHI:1477#GzHMG009#5518#Fusarium_graminearum#unaffected_pathogenicity	48.571	1.01e-18	89.4
AR4307g8826	G4MRV1#PHI:873#MGG_02443#318829#Magnaporthe_oryzae#reduced_virulence	48.568	0	831
AR4307g9666	U3PW09#PHI:7047#Aqp1#5207#Cryptococcus_neoformans#unaffected_pathogenicity	48.536	1.06e-71	228
AR4307g3610	Q4WZG4#PHI:2551#NOC3#746128#Aspergillus_fumigatus#lethal	48.519	0	596
AR4307g11607	Q6FM61#PHI:2570#CYB2#5478#Candida_glabrata#reduced_virulence	48.485	3.15e-13	63.2
AR4307g12082	J5JMB3#PHI:6746#Mdj1#176275#Beauveria_bassiana#reduced_virulence	48.485	8.31e-12	65.9
AR4307g6964	I1RL97#PHI:1862#GzZC177#5518#Fusarium_graminearum#unaffected_pathogenicity	48.459	4.51e-175	515
AR4307g573	B1GVX7#PHI:2290#BcBOA6#40559#Botrytis_cinerea#reduced_virulence	48.452	0	1221
AR4307g2295	P04046#PHI:502#ADE4#4932#Saccharomyces_cerevisiae#reduced_virulence	48.45	3.71e-159	466
AR4307g5896	G4ZHR2#PHI:6868#PsXEG1#67593#Phytophthora_sojae#effector_(plant_avirulence_determinant)	48.43	1.1e-68	213
AR4307g1529	I1RCK0#PHI:1920#GzZC235#5518#Fusarium_graminearum#unaffected_pathogenicity	48.366	9.03e-32	125
AR4307g8211	E7Q5D7#PHI:5043#Hsp150p#4932#Saccharomyces_cerevisiae#increased_virulence_(hypervirulence)	48.352	1.45e-20	90.1
AR4307g340	I1RQS2#PHI:1327#GzbZIP009#5518#Fusarium_graminearum#unaffected_pathogenicity	48.328	7.57e-153	470
AR4307g6114	J9VNE4#PHI:7828#Uxt1#5207#Cryptococcus_neoformans#reduced_virulence__unaffected_pathogenicity	48.289	3.39e-73	235
AR4307g5559	C6ZRH8#PHI:2976#CgOPT1#474922#Colletotrichum_gloeosporioides#reduced_virulence	48.252	0	708
AR4307g1590	G4NIZ2#PHI:2090#Moatg29#318829#Magnaporthe_oryzae#unaffected_pathogenicity	48.21	1.58e-85	269
AR4307g359	I1S7J0#PHI:1819#GzZC134#5518#Fusarium_graminearum#unaffected_pathogenicity	48.207	2.49e-72	238
AR4307g10666	Q4UUL4#PHI:3945#XC_2203#339#Xanthomonas_campestris#reduced_virulence	48.201	2.65e-39	134
AR4307g11316	Q5AAI8#PHI:4045#Nap1#5476#Candida_albicans#reduced_virulence	48.187	8.67e-107	324
AR4307g6235	Q5AJ90#PHI:3688#Fox3p#5476#Candida_albicans#unaffected_pathogenicity	48.175	3.15e-123	365
AR4307g7723	G4MTK2#PHI:5232#MoARG1#318829#Magnaporthe_oryzae#loss_of_pathogenicity	48.157	8.06e-120	355
AR4307g6776	I1RDG6#PHI:1555#GzMyb019#5518#Fusarium_graminearum#unaffected_pathogenicity	48.155	2.67e-168	493
AR4307g7706	Q0U2A0#PHI:2255#Abd1#13684#Parastagonospora_nodorum#unaffected_pathogenicity	48.148	2.56e-99	301
AR4307g5357	H8ZZ79#PHI:2710#mepB#474922#Colletotrichum_gloeosporioides#reduced_virulence	48.14	2.11e-139	411
AR4307g7997	A0A1C3YMS1#PHI:5868#Fgsg12463#5518#Fusarium_graminearum#unaffected_pathogenicity	48.138	1.56e-113	340
AR4307g107	G4N402#PHI:2107#MGG_05905.5#318829#Magnaporthe_oryzae#unaffected_pathogenicity__reduced_virulence	48.118	4.41e-172	502
AR4307g1176	G4N7A0#PHI:2180#MoTea4#318829#Magnaporthe_oryzae#loss_of_pathogenicity	48.074	1.16e-136	446
AR4307g41	Q51ZN8#PHI:2070#Moatg2#318829#Magnaporthe_oryzae#loss_of_pathogenicity	48.071	0	1766
AR4307g5409	F5B5Y4#PHI:6206#BbCypC#176275#Beauveria_bassiana#unaffected_pathogenicity	48.052	1.06e-45	159
AR4307g10431	I1RFF7#PHI:1837#GzZC152#5518#Fusarium_graminearum#unaffected_pathogenicity	48.052	1.11e-16	80.1
AR4307g1756	Q04701#PHI:179#PELA#140110#Nectria_haematococca#reduced_virulence	48.031	1.8e-68	213
AR4307g7937	G5EI55#PHI:2154#RBP35#318829#Magnaporthe_oryzae#reduced_virulence	48.018	2.4e-54	186
AR4307g735	I1RF11#PHI:5874#Fgsg02274#5518#Fusarium_graminearum#unaffected_pathogenicity	48.011	3e-105	317
AR4307g11904	A5H456#PHI:867__PHI:1159#MgAtr7#1047171#Zymoseptoria_tritici#unaffected_pathogenicity__chemistry_target:_sensitivity_to_chemical	47.95	2.91e-93	316
AR4307g2593	A0A0F6AZ26#PHI:7212#STM14_1003#28901#Salmonella_enterica#reduced_virulence	47.937	3.8e-84	259
AR4307g337	G4NB64#PHI:4110#MoVOSA#318829#Magnaporthe_oryzae#unaffected_pathogenicity	47.926	2.66e-53	186
AR4307g10862	O93800#PHI:133#AKT1#5599#Alternaria_alternata#loss_of_pathogenicity	47.899	3.16e-32	119
AR4307g12369	F8SM03#PHI:2179#Moplaa#318829#Magnaporthe_oryzae#reduced_virulence	47.893	4.07e-167	496
AR4307g7990	I1RWZ1#PHI:1688#GzZC003#5518#Fusarium_graminearum#unaffected_pathogenicity	47.865	0	616
AR4307g4424	Q99174#PHI:2849#cutA#169388#Fusarium_solani#unaffected_pathogenicity	47.826	6.61e-71	218
AR4307g7548	P03962#PHI:506#URA3#4932#Saccharomyces_cerevisiae#reduced_virulence	47.826	4.15e-34	127
AR4307g3904	G4MNA5#PHI:2096#Calcium-transporting_ATPase_3#318829#Magnaporthe_oryzae#loss_of_pathogenicity	47.784	0	801
AR4307g10686	M1WES1#PHI:6267__PHI:8120#cpipt-log__ipt-log_(cpur_04177)#5111#Claviceps_purpurea#reduced_virulence__loss_of_pathogenicity__unaffected_pathogenicity	47.739	1.02e-54	184
AR4307g6199	I1S4X3#PHI:1843#GzZC158#5518#Fusarium_graminearum#unaffected_pathogenicity	47.738	4.04e-138	424
AR4307g5626	I1S3J7#PHI:1424#GzC2H092#5518#Fusarium_graminearum#unaffected_pathogenicity	47.727	8.65e-126	399
AR4307g8848	Q9UW03#PHI:202__PHI:1160__PHI:2309#BcatrB#40559#Botrytis_cinerea#unaffected_pathogenicity__reduced_virulence__chemistry_target:_sensitivity_to_chemical	47.724	0	1298
AR4307g2236	F9X9S4#PHI:4944#KU80#1047171#Zymoseptoria_tritici#unaffected_pathogenicity	47.718	0	675
AR4307g5632	H8ZZ79#PHI:2710#mepB#474922#Colletotrichum_gloeosporioides#reduced_virulence	47.711	9.77e-125	372
AR4307g9669	G1X666#PHI:8036#AoRab-2_(AOL_s00054g360)#13349#Arthrobotrys_oligospora#unaffected_pathogenicity	47.656	8.08e-31	116
AR4307g7424	A0A0A2JY92#PHI:7666#LysM3#27334#Penicillium_expansum#effector_(plant_avirulence_determinant)	47.656	1.64e-29	118
AR4307g2950	Q5AMP3#PHI:7011#arl1#5476#Candida_albicans#reduced_virulence	47.647	6.84e-51	163
AR4307g12704	Q5K6X5#PHI:6297#CDC50#5207#Cryptococcus_neoformans#reduced_virulence	47.631	6.03e-121	360
AR4307g952	I1S0H5#PHI:7717#FgOXP1#5518#Fusarium_graminearum#reduced_virulence	47.612	0	1173
AR4307g10871	I1S2A9#PHI:1784#GzZC099#5518#Fusarium_graminearum#unaffected_pathogenicity	47.589	1.77e-139	411
AR4307g4065	G1UAE0#PHI:242#CaTPS2#5476#Candida_albicans#reduced_virulence	47.573	0	747
AR4307g5462	A0A1C3YMM2#PHI:5872#Fgsg02853#5518#Fusarium_graminearum#unaffected_pathogenicity	47.552	2.92e-72	229
AR4307g10165	I1R9Z0#PHI:1469#GzHMG001#5518#Fusarium_graminearum#unaffected_pathogenicity	47.531	0	606
AR4307g11141	Q4WHH1#PHI:2547#ESF1#746128#Aspergillus_fumigatus#lethal	47.507	6.53e-155	468
AR4307g10350	G4NAT7#PHI:3811#TDG4#318829#Magnaporthe_oryzae#reduced_virulence	47.486	0	635
AR4307g2972	J9VNI6#PHI:7178#Ape4#5207#Cryptococcus_neoformans#reduced_virulence	47.471	9.43e-161	471
AR4307g8775	G4NAJ8#PHI:6223#MoYvh1#318829#Magnaporthe_oryzae#reduced_virulence	47.47	4.43e-114	345
AR4307g11074	D2E9X0#PHI:2379#DEP5#29001#Alternaria_brassicicola#reduced_virulence__unaffected_pathogenicity	47.459	0	1152
AR4307g4275	I1RRB9#PHI:1229#FGSG_06637#5518#Fusarium_graminearum#lethal	47.454	1.15e-105	333
AR4307g6609	G4NGB1#PHI:3311__PHI:5661#pcf1__PCF1#318829#Magnaporthe_oryzae#reduced_virulence	47.447	0	562
AR4307g212	Q9P4U9#PHI:2832#AKT3-1#5599#Alternaria_alternata#loss_of_pathogenicity	47.445	2.65e-79	244
AR4307g9608	G4MTK9#PHI:4885#MoYpd1p#318829#Magnaporthe_oryzae#loss_of_pathogenicity	47.445	1.09e-33	117
AR4307g6070	I1RMX8#PHI:1939#GzZC254#5518#Fusarium_graminearum#unaffected_pathogenicity	47.442	6.73e-59	194
AR4307g12428	Q6IZ77#PHI:3909#ZrfB#746128#Aspergillus_fumigatus#reduced_virulence__loss_of_pathogenicity	47.399	7.53e-95	288
AR4307g2781	I1SAN0#PHI:1528#GzHOMEL041#5518#Fusarium_graminearum#unaffected_pathogenicity	47.387	0	820
AR4307g794	I1S0H5#PHI:7717#FgOXP1#5518#Fusarium_graminearum#reduced_virulence	47.347	0	636
AR4307g10215	G4NJD1#PHI:2171#Peroxisomal_copper_amine_oxidase#318829#Magnaporthe_oryzae#reduced_virulence	47.345	0	621
AR4307g2094	G4MSQ8#PHI:5686#FZC82#318829#Magnaporthe_oryzae#unaffected_pathogenicity	47.331	0	605
AR4307g9140	C0NFK7#PHI:6265#Eng1#5037#Histoplasma_capsulatum#reduced_virulence	47.284	1.56e-87	268
AR4307g6867	G4MS58#PHI:881#MGG_04556#318829#Magnaporthe_oryzae#reduced_virulence	47.279	6.77e-87	265
AR4307g7776	G4N0U1#PHI:2134#MoHox5#318829#Magnaporthe_oryzae#reduced_virulence	47.226	3.18e-148	449
AR4307g5168	I1S5J4#PHI:1866#GzZC181#5518#Fusarium_graminearum#unaffected_pathogenicity	47.2	4.19e-30	119
AR4307g3416	I1RJL0#PHI:1308#GzbHLH009#5518#Fusarium_graminearum#unaffected_pathogenicity	47.195	7.9e-62	199
AR4307g392	J9VMG2#PHI:4883#Kcs1#5207#Cryptococcus_neoformans#reduced_virulence__loss_of_pathogenicity	47.17	1.27e-41	165
AR4307g1084	E3KNM7#PHI:3998#Pgt-IaaM#5297#Puccinia_graminis#reduced_virulence	47.148	0	545
AR4307g1505	A0A1C3YJ97#PHI:5796#Fgsg02569#5518#Fusarium_graminearum#unaffected_pathogenicity	47.148	8.23e-85	266
AR4307g3769	Q8X116#PHI:540__PHI:1029#BCPME2__bcpme2#40559#Botrytis_cinerea#unaffected_pathogenicity	47.112	3.85e-92	280
AR4307g10478	Q6FM61#PHI:2570#CYB2#5478#Candida_glabrata#reduced_virulence	47.097	1.41e-32	129
AR4307g3256	A0A0R1BRS8#PHI:6090#katE#106654#Acinetobacter_nosocomialis#increased_virulence_(hypervirulence)	47.059	0	612
AR4307g695	Q4WF54#PHI:2322#SidH#746128#Aspergillus_fumigatus#reduced_virulence	47.059	6.82e-88	265
AR4307g12258	I1RU67#PHI:1392#GzC2H055#5518#Fusarium_graminearum#unaffected_pathogenicity	47.02	2.54e-123	379
AR4307g4650	J9VQL2#PHI:3529#VTC4#5207#Cryptococcus_neoformans#increased_virulence_(hypervirulence)	47.009	3.2e-30	114
AR4307g5196	I1SAR3#PHI:1285#FGSG_13944#5518#Fusarium_graminearum#unaffected_pathogenicity	46.97	1.66e-13	69.7
AR4307g5860	I1RM25#PHI:1579#GzOB019#5518#Fusarium_graminearum#unaffected_pathogenicity	46.951	0	598
AR4307g2665	Q6FM27#PHI:3793#ANP1#5478#Candida_glabrata#increased_virulence_(hypervirulence)	46.951	8.65e-102	309
AR4307g8587	I1R980#PHI:2393#(O-methylsterigmatocystin_oxidoreductase)#5518#Fusarium_graminearum#increased_virulence_(hypervirulence)	46.939	5.02e-162	471
AR4307g7475	I1RDG6#PHI:1555#GzMyb019#5518#Fusarium_graminearum#unaffected_pathogenicity	46.931	2.3e-172	502
AR4307g10276	P0CT09#PHI:7223#Moend3#318829#Magnaporthe_oryzae#reduced_virulence	46.914	2.85e-14	74.7
AR4307g4342	I1RD96#PHI:3984#FGSG_01588_(Sc_gpi7)#5518#Fusarium_graminearum#unaffected_pathogenicity	46.903	2.39e-17	82.4
AR4307g12140	P04046#PHI:502#ADE4#4932#Saccharomyces_cerevisiae#reduced_virulence	46.89	4.35e-124	373
AR4307g10789	A0A0D5BX39#PHI:4750#ChPMA2#80884#Colletotrichum_higginsianum#loss_of_pathogenicity	46.875	0	839
AR4307g1867	O59928#PHI:144#CHT42#29875#Trichoderma_virens#reduced_virulence	46.867	1.34e-128	379
AR4307g992	G2XD68#PHI:8858#VdSSEP1_(VDAG-08100)#27337#Verticillium_dahliae#reduced_virulence	46.84	1.96e-62	223
AR4307g9910	Q9Y8A2#PHI:255#FUM1_(FUM5)#5127#Fusarium_fujikuroi#unaffected_pathogenicity	46.835	9.81e-160	506
AR4307g4477	I1RU69#PHI:1393#GzC2H056#5518#Fusarium_graminearum#unaffected_pathogenicity	46.832	0	588
AR4307g12700	A0N0D1#PHI:2216#PemG1#318829#Magnaporthe_oryzae#effector_(plant_avirulence_determinant)	46.828	5.51e-46	159
AR4307g10591	G4NAW7#PHI:5689#FZC84#318829#Magnaporthe_oryzae#unaffected_pathogenicity	46.781	0	563
AR4307g687	J4USC3#PHI:6471#Trr2#176275#Beauveria_bassiana#reduced_virulence	46.732	2.4e-81	251
AR4307g4396	Q0UA24#PHI:2256#Xdh1#13684#Parastagonospora_nodorum#unaffected_pathogenicity	46.705	4.37e-115	341
AR4307g3708	I1RM25#PHI:1579#GzOB019#5518#Fusarium_graminearum#unaffected_pathogenicity	46.699	0	771
AR4307g3794	I1R9R2#PHI:1996#GzZC311#5518#Fusarium_graminearum#unaffected_pathogenicity	46.686	0	596
AR4307g3530	G4N6I1#PHI:5692#FZC87#318829#Magnaporthe_oryzae#unaffected_pathogenicity	46.684	2.05e-99	301
AR4307g4699	C5P3X6#PHI:479#MEP1#199306#Coccidioides_posadasii#reduced_virulence	46.667	1.29e-75	241
AR4307g1291	I1RYV5#PHI:1514#GzHOME012#5518#Fusarium_graminearum#unaffected_pathogenicity	46.667	3.27e-46	162
AR4307g874	I1RG94#PHI:1322#GzbZIP004#5518#Fusarium_graminearum#unaffected_pathogenicity	46.647	1.73e-81	254
AR4307g8819	G4MPA8#PHI:890#MGG_07015#318829#Magnaporthe_oryzae#reduced_virulence	46.645	0	544
AR4307g5848	G1X666#PHI:8036#AoRab-2_(AOL_s00054g360)#13349#Arthrobotrys_oligospora#unaffected_pathogenicity	46.64	1e-71	220
AR4307g7324	I1RTH7#PHI:1890#GzZC205#5518#Fusarium_graminearum#unaffected_pathogenicity	46.614	0	566
AR4307g9193	Q9C2Y4#PHI:405#PDE1#318829#Magnaporthe_oryzae#reduced_virulence	46.557	0	1180
AR4307g3661	P15801#PHI:505#MIP1#4932#Saccharomyces_cerevisiae#reduced_virulence	46.549	0	957
AR4307g11266	Q4WNM3#PHI:2552#NOP4#746128#Aspergillus_fumigatus#lethal	46.549	0	593
AR4307g4644	G4MUI1#PHI:790#MGG_07259#318829#Magnaporthe_oryzae#reduced_virulence	46.548	3.51e-130	388
AR4307g10621	Q4WF54#PHI:2322#SidH#746128#Aspergillus_fumigatus#reduced_virulence	46.52	1.34e-80	246
AR4307g8617	Q9Y885#PHI:157#TOXF#5017#Bipolaris_zeicola#loss_of_pathogenicity	46.512	7.66e-102	307
AR4307g5166	Q4WYE4#PHI:7168#crpA#746128#Aspergillus_fumigatus#reduced_virulence	46.461	0	754
AR4307g6880	G4MNQ6#PHI:6638#Modnm2#318829#Magnaporthe_oryzae#unaffected_pathogenicity	46.429	2.25e-109	352
AR4307g12226	I1RUC7#PHI:1260#FGSG_07816#5518#Fusarium_graminearum#unaffected_pathogenicity	46.377	7.07e-25	107
AR4307g6771	I1S134#PHI:1767#GzZC082#5518#Fusarium_graminearum#unaffected_pathogenicity	46.361	0	570
AR4307g7596	J9VNE4#PHI:7828#Uxt1#5207#Cryptococcus_neoformans#reduced_virulence__unaffected_pathogenicity	46.341	1.74e-77	245
AR4307g7509	P0A038#PHI:6904#GAPDH#1280#Staphylococcus_aureus#reduced_virulence	46.291	7.99e-97	292
AR4307g703	G4NFU3#PHI:2103#MGG_08710.5#318829#Magnaporthe_oryzae#unaffected_pathogenicity	46.237	7.06e-20	87
AR4307g733	Q5A1L6#PHI:3822#GIT3#5476#Candida_albicans#reduced_virulence	46.23	5.78e-148	437
AR4307g4541	I1RV04#PHI:1814#GzZC129#5518#Fusarium_graminearum#lethal	46.188	0	545
AR4307g4126	C0NFK7#PHI:6265#Eng1#5037#Histoplasma_capsulatum#reduced_virulence	46.179	1.26e-85	264
AR4307g372	I1RYV5#PHI:1514#GzHOME012#5518#Fusarium_graminearum#unaffected_pathogenicity	46.175	0	599
AR4307g6619	Q8TG07#PHI:3600#plb1#5478#Candida_glabrata#unaffected_pathogenicity	46.167	1.62e-168	500
AR4307g10102	Q2FID9#PHI:3348#nfu#1280#Staphylococcus_aureus#reduced_virulence	46.154	5.24e-11	57
AR4307g9215	I1S9G1#PHI:1435#GzC2H104#5518#Fusarium_graminearum#unaffected_pathogenicity	46.089	7.54e-128	400
AR4307g5331	I1RC95#PHI:1566#GzOB006#5518#Fusarium_graminearum#lethal	46.082	2.72e-102	312
AR4307g919	I1RC95#PHI:1566#GzOB006#5518#Fusarium_graminearum#lethal	46.075	2.38e-86	271
AR4307g7086	I1S0N5#PHI:1552#GzMyb016#5518#Fusarium_graminearum#unaffected_pathogenicity	46.074	4.04e-137	452
AR4307g5508	Q59RB8#PHI:477#ICL1#5476#Candida_albicans#reduced_virulence	46.067	2.36e-170	498
AR4307g7219	A0A098DM90#PHI:5864#GCD12#5518#Fusarium_graminearum#unaffected_pathogenicity	46.049	7.25e-111	336
AR4307g11701	F6K8L7#PHI:2842#CnSFH5#5207#Cryptococcus_neoformans#unaffected_pathogenicity__reduced_virulence	46.038	4.54e-72	229
AR4307g8671	Q0V515#PHI:3914#Sdh1#13684#Parastagonospora_nodorum#reduced_virulence	46.029	2.1e-143	424
AR4307g9307	Q4WES1#PHI:2550#NOB1#746128#Aspergillus_fumigatus#lethal	46.014	1.15e-127	379
AR4307g5491	J9VNZ8#PHI:3528#PHO89#5207#Cryptococcus_neoformans#reduced_virulence	46.013	0	530
AR4307g11260	C5BF98#PHI:2959#mdh#67780#Edwardsiella_ictaluri#reduced_virulence	46.012	5.27e-81	250
AR4307g12268	I1RC95#PHI:1566#GzOB006#5518#Fusarium_graminearum#lethal	45.968	1.17e-107	324
AR4307g7344	G2WY50#PHI:4909#VdQase#27337#Verticillium_dahliae#reduced_virulence	45.93	2.55e-101	322
AR4307g3229	I1RFM6#PHI:744#ADE5#5518#Fusarium_graminearum#reduced_virulence	45.926	3.02e-35	129
AR4307g7894	Q96VL9#PHI:543#BCATRD#40559#Botrytis_cinerea#unaffected_pathogenicity	45.902	8.79e-44	156
AR4307g9680	I1RB89#PHI:1474#GzHMG006#5518#Fusarium_graminearum#unaffected_pathogenicity	45.87	0	634
AR4307g7971	Q96WM9#PHI:552#BcLCC2#40559#Botrytis_cinerea#unaffected_pathogenicity	45.868	4.19e-175	510
AR4307g5177	A0A0F6AZ29#PHI:7216#STM14_1007#28901#Salmonella_enterica#reduced_virulence	45.817	1.07e-162	479
AR4307g12159	G4NDI1#PHI:8523#MoYPEL1_(MGG_06263.7)#318829#Magnaporthe_oryzae#reduced_virulence__loss_of_pathogenicity	45.763	1.77e-52	173
AR4307g4756	I1RA31#PHI:1461#GzCCAAT001#5518#Fusarium_graminearum#unaffected_pathogenicity	45.763	2.67e-19	88.6
AR4307g3184	I1RIS2#PHI:5353#Famfs1#282267#Fusarium_asiaticum#reduced_virulence	45.755	5.71e-57	200
AR4307g9593	I1RKH7#PHI:1482#GzHMG014#5518#Fusarium_graminearum#unaffected_pathogenicity	45.706	2.56e-74	236
AR4307g2993	E3QNW8#PHI:6228#KRE6#31870#Colletotrichum_graminicola#reduced_virulence	45.676	4.63e-123	370
AR4307g2881	A0A1C3YI15#PHI:5833#Fgsg00994#5518#Fusarium_graminearum#unaffected_pathogenicity	45.62	1.1e-76	243
AR4307g5643	Q7Z8E8#PHI:419#CSH1#5476#Candida_albicans#reduced_virulence	45.619	5.5e-91	276
AR4307g4790	Q4WZA8#PHI:6891#pksP#746128#Aspergillus_fumigatus#reduced_virulence__unaffected_pathogenicity	45.592	0	1922
AR4307g10880	I1S0X3#PHI:1776#GzZC091#5518#Fusarium_graminearum#unaffected_pathogenicity	45.576	1.9e-116	347
AR4307g12407	B8NKR0#PHI:7316#dot1#5059#Aspergillus_flavus#reduced_virulence	45.565	6.97e-121	365
AR4307g438	I1S578#PHI:1731#GzZC046#5518#Fusarium_graminearum#unaffected_pathogenicity	45.545	4.97e-106	326
AR4307g11164	G4N492#PHI:2030#TGL3-1#318829#Magnaporthe_oryzae#unaffected_pathogenicity	45.543	0	564
AR4307g5807	J9VW42#PHI:7944#Uut1_(CNAG_06230)#5207#Cryptococcus_neoformans#loss_of_pathogenicity	45.515	5.58e-71	233
AR4307g1974	I1S0N5#PHI:1552#GzMyb016#5518#Fusarium_graminearum#unaffected_pathogenicity	45.455	1.28e-117	399
AR4307g5156	A0A0F6AZ25#PHI:7211#STM14_1002#28901#Salmonella_enterica#reduced_virulence	45.455	2.18e-71	222
AR4307g6511	J9VHR2#PHI:8615#Grx4_(CNAG_02950)#5207#Cryptococcus_neoformans#loss_of_pathogenicity	45.455	1.42e-24	95.5
AR4307g11672	Q32WF7#PHI:2269#Mdh1#13684#Parastagonospora_nodorum#unaffected_pathogenicity	45.418	2.61e-70	219
AR4307g7224	A0A384JRT5#PHI:8606#BcXyl1#40559#Botrytis_cinerea#reduced_virulence	45.411	3.43e-48	176
AR4307g357	G4NC17#PHI:5185#MoAPX1#318829#Magnaporthe_oryzae#reduced_virulence	45.402	2.61e-148	436
AR4307g1303	Q5D1P9#PHI:481#KLAP1#27357#Colletotrichum_acutatum#unaffected_pathogenicity__loss_of_pathogenicity	45.396	6.21e-130	400
AR4307g7248	G4NAT7#PHI:3811#TDG4#318829#Magnaporthe_oryzae#reduced_virulence	45.389	0	582
AR4307g9603	Q6FV98#PHI:6626#CgTpo1_2#5478#Candida_glabrata#reduced_virulence	45.377	9.23e-160	473
AR4307g9684	I1S4Q8#PHI:1654#GzWing027#5518#Fusarium_graminearum#unaffected_pathogenicity	45.367	4.54e-56	193
AR4307g9733	Q6X269#PHI:338#CLB2#5270#Ustilago_maydis#reduced_virulence	45.349	5.9e-76	255
AR4307g673	Q51Y68#PHI:2083#Moatg17#318829#Magnaporthe_oryzae#loss_of_pathogenicity	45.342	1.41e-130	392
AR4307g7737	G2X8Y4#PHI:7741#FreB#27337#Verticillium_dahliae#reduced_virulence	45.331	7.32e-152	453
AR4307g11579	Q32WF7#PHI:2269#Mdh1#13684#Parastagonospora_nodorum#unaffected_pathogenicity	45.318	3.03e-76	235
AR4307g11118	G4MNA5#PHI:2096#Calcium-transporting_ATPase_3#318829#Magnaporthe_oryzae#loss_of_pathogenicity	45.29	0	849
AR4307g6133	G4MMH7#PHI:2115__PHI:4494#Annexin_A7__AnnA7#318829#Magnaporthe_oryzae#loss_of_pathogenicity__reduced_virulence	45.246	1.05e-72	238
AR4307g3402	A0A151V4F3#PHI:6391#CDA2#318829#Magnaporthe_oryzae#unaffected_pathogenicity	45.217	5.93e-60	199
AR4307g8519	A0A1C3YMS1#PHI:5868#Fgsg12463#5518#Fusarium_graminearum#unaffected_pathogenicity	45.213	1.36e-108	327
AR4307g11135	I1S0N5#PHI:1552#GzMyb016#5518#Fusarium_graminearum#unaffected_pathogenicity	45.196	4.63e-74	262
AR4307g3745	I1RM60#PHI:1371#GzC2H034#5518#Fusarium_graminearum#unaffected_pathogenicity	45.192	1.06e-23	94.4
AR4307g12321	I1S1D3#PHI:1822#GzZC137#5518#Fusarium_graminearum#unaffected_pathogenicity	45.174	2.54e-57	196
AR4307g3579	P95830#PHI:6986#DnaJ#1313#Streptococcus_pneumoniae#reduced_virulence	45.161	1.08e-10	60.1
AR4307g3481	G2XD68#PHI:8858#VdSSEP1_(VDAG-08100)#27337#Verticillium_dahliae#reduced_virulence	45.098	0	700
AR4307g1338	G8AA67#PHI:2476#CcpelA#27358#Colletotrichum_coccodes#reduced_virulence__increased_virulence_(hypervirulence)	45.089	2.14e-55	188
AR4307g8863	I1RPI0#PHI:1640#GzWing012#5518#Fusarium_graminearum#unaffected_pathogenicity	45.055	1.38e-101	310
AR4307g989	G4ZHR2#PHI:6868#PsXEG1#67593#Phytophthora_sojae#effector_(plant_avirulence_determinant)	45	7.08e-58	186
AR4307g5239	Q4Q4W3#PHI:5554#LmABCB3#5664#Leishmania_major#reduced_virulence	45	2.37e-30	125
AR4307g6564	I1RC95#PHI:1566#GzOB006#5518#Fusarium_graminearum#lethal	44.985	2.05e-97	299
AR4307g9432	Q5ADN1#PHI:6074#Tpd3#5476#Candida_albicans#reduced_virulence	44.961	0	536
AR4307g8916	I1S353#PHI:1778#GzZC093#5518#Fusarium_graminearum#unaffected_pathogenicity	44.94	7.89e-166	486
AR4307g854	G4N1P8#PHI:5440#ABA4#318829#Magnaporthe_oryzae#reduced_virulence	44.939	6.6e-67	209
AR4307g1568	C5BAT0#PHI:2961#gcvP#67780#Edwardsiella_ictaluri#reduced_virulence	44.935	0	802
AR4307g851	Q99174#PHI:2849#cutA#169388#Fusarium_solani#unaffected_pathogenicity	44.915	1.01e-66	207
AR4307g2264	C6ZRH8#PHI:2976#CgOPT1#474922#Colletotrichum_gloeosporioides#reduced_virulence	44.895	0	641
AR4307g5501	G4N1P8#PHI:5440#ABA4#318829#Magnaporthe_oryzae#reduced_virulence	44.886	4.07e-34	128
AR4307g511	P06618#PHI:4171#iaaH-1#29438#Pseudomonas_savastanoi#reduced_virulence	44.882	3.32e-12	66.6
AR4307g4170	Q9P8L8#PHI:544#BCMFS1#40559#Botrytis_cinerea#unaffected_pathogenicity	44.845	1.37e-170	516
AR4307g7503	Q96WM9#PHI:552#BcLCC2#40559#Botrytis_cinerea#unaffected_pathogenicity	44.845	2.75e-163	480
AR4307g1968	G4MQQ3#PHI:3065#MoRga5#318829#Magnaporthe_oryzae#unaffected_pathogenicity	44.836	0	615
AR4307g2643	I1RCP3#PHI:1478#GzHMG010#5518#Fusarium_graminearum#unaffected_pathogenicity	44.821	8.11e-121	367
AR4307g6881	J9VMW8#PHI:3457#PHO84#5207#Cryptococcus_neoformans#reduced_virulence	44.815	5.1e-150	451
AR4307g6754	G4MPP9#PHI:885#MGG_02240#318829#Magnaporthe_oryzae#reduced_virulence	44.811	2.79e-126	418
AR4307g1625	G4MS03#PHI:2006__PHI:2008#HST1#318829#Magnaporthe_oryzae#unaffected_pathogenicity	44.755	4.68e-35	134
AR4307g224	Q59X38#PHI:2823#PES1#5476#Candida_albicans#reduced_virulence	44.747	7.35e-137	416
AR4307g9671	P29138#PHI:4615#Pr1#5530#Metarhizium_anisopliae#unaffected_pathogenicity	44.745	1.48e-83	263
AR4307g12189	Q5AND9#PHI:7009#arf2#5476#Candida_albicans#reduced_virulence	44.737	3.68e-22	94.4
AR4307g8437	B5DBZ7#PHI:1040#Lmgpi15#5022#Leptosphaeria_maculans#reduced_virulence	44.712	8.51e-45	150
AR4307g3192	I1REN7#PHI:1681#GzNF001#5518#Fusarium_graminearum#unaffected_pathogenicity	44.7	1.03e-135	462
AR4307g11757	I1RQU2#PHI:1964#GzZC279#5518#Fusarium_graminearum#unaffected_pathogenicity	44.681	4.46e-124	371
AR4307g12274	A7EU07#PHI:4508#Ss-odc1#5180#Sclerotinia_sclerotiorum#unaffected_pathogenicity	44.628	7.05e-113	343
AR4307g634	G4N9C8#PHI:2173#NMR1#318829#Magnaporthe_oryzae#reduced_virulence	44.625	2.67e-84	258
AR4307g1863	A0A0F6AZ27#PHI:7214#STM14_1005#28901#Salmonella_enterica#reduced_virulence	44.615	1.24e-111	336
AR4307g2319	I1S389#PHI:1781#GzZC096#5518#Fusarium_graminearum#unaffected_pathogenicity	44.557	0	573
AR4307g1401	P04173#PHI:504#LEU2#4932#Saccharomyces_cerevisiae#reduced_virulence	44.444	2.13e-32	126
AR4307g11229	Q5NEU6#PHI:4733#dnaJ#263#Francisella_tularensis#unaffected_pathogenicity	44.444	3.56e-11	58.2
AR4307g10874	H8ZZ79#PHI:2710#mepB#474922#Colletotrichum_gloeosporioides#reduced_virulence	44.417	1.04e-112	341
AR4307g7863	Q32WF7#PHI:2269#Mdh1#13684#Parastagonospora_nodorum#unaffected_pathogenicity	44.404	3.84e-72	224
AR4307g2458	I1RBT2#PHI:1347#GzC2H007#5518#Fusarium_graminearum#reduced_virulence	44.33	3.53e-94	303
AR4307g10630	C3PTB1#PHI:2834#LAM1#5016#Bipolaris_maydis#reduced_virulence	44.328	2.51e-135	406
AR4307g702	G4NFU3#PHI:2103#MGG_08710.5#318829#Magnaporthe_oryzae#unaffected_pathogenicity	44.311	5.92e-40	151
AR4307g4321	I1RG47#PHI:1942#GzZC257#5518#Fusarium_graminearum#unaffected_pathogenicity	44.174	0	625
AR4307g5574	Q9Y7G8#PHI:407#PBC1#76659#Pyrenopeziza_brassicae#loss_of_pathogenicity	44.086	1.91e-45	153
AR4307g7014	I1RTH7#PHI:1890#GzZC205#5518#Fusarium_graminearum#unaffected_pathogenicity	44.024	4.71e-165	509
AR4307g10780	G2XHI2#PHI:7172#Clp-1#27337#Verticillium_dahliae#reduced_virulence	43.988	1.36e-177	532
AR4307g2414	Q2LK92#PHI:548__PHI:2305#BcPIC5__BcFKBP12#40559#Botrytis_cinerea#reduced_virulence__unaffected_pathogenicity__increased_virulence_(hypervirulence)	43.966	3.63e-19	82.8
AR4307g5398	C3JXE8#PHI:2835#RED2#5016#Bipolaris_maydis#reduced_virulence	43.939	3.75e-50	170
AR4307g6746	P21264#PHI:501#ADE2#4932#Saccharomyces_cerevisiae#reduced_virulence	43.934	8.01e-164	483
AR4307g7212	B0LLU1#PHI:1134#ipa#5022#Leptosphaeria_maculans#increased_virulence_(hypervirulence)	43.924	0	569
AR4307g7314	G5EHQ9#PHI:2174#NMR2#318829#Magnaporthe_oryzae#reduced_virulence	43.871	2.63e-89	271
AR4307g11599	Q04701#PHI:179#PELA#140110#Nectria_haematococca#reduced_virulence	43.836	5.14e-10	53.5
AR4307g6756	J9VNZ8#PHI:3528#PHO89#5207#Cryptococcus_neoformans#reduced_virulence	43.82	8.87e-69	227
AR4307g1501	Q882F5#PHI:7788#AldB_(PSPTO_2673)#317#Pseudomonas_syringae#reduced_virulence	43.776	8.23e-132	394
AR4307g4791	Q4WJR9#PHI:6554#sB#746128#Aspergillus_fumigatus#unaffected_pathogenicity	43.774	0	657
AR4307g11685	G4YQK3#PHI:6261#PsAAT3#67593#Phytophthora_sojae#reduced_virulence	43.75	1.01e-111	337
AR4307g2817	F6K8L6#PHI:2841#CnSEC14-2#5207#Cryptococcus_neoformans#unaffected_pathogenicity	43.726	1.17e-64	207
AR4307g12734	D3W9Z8#PHI:3907#ZrfC#746128#Aspergillus_fumigatus#reduced_virulence__loss_of_pathogenicity	43.701	7.4e-126	382
AR4307g10382	P34809#PHI:19#NMT#5207#Cryptococcus_neoformans#reduced_virulence	43.699	2.16e-135	405
AR4307g2719	I1RM25#PHI:1579#GzOB019#5518#Fusarium_graminearum#unaffected_pathogenicity	43.689	6.7e-46	179
AR4307g9474	J9N0G7#PHI:1105#FOXG_08661#5507#Fusarium_oxysporum#unaffected_pathogenicity	43.662	4.89e-12	60.1
AR4307g4176	I1S0H5#PHI:7717#FgOXP1#5518#Fusarium_graminearum#reduced_virulence	43.651	1.04e-20	90.5
AR4307g11868	Q9P8L8#PHI:544#BCMFS1#40559#Botrytis_cinerea#unaffected_pathogenicity	43.649	4.24e-168	493
AR4307g12635	J7MF98#PHI:2700#lac2#5465#Colletotrichum_orbiculare#reduced_virulence	43.644	7.74e-56	190
AR4307g5820	O93841#PHI:243#CHIP6#474922#Colletotrichum_gloeosporioides#reduced_virulence	43.639	0	699
AR4307g5030	Q99324#PHI:191#TOM1#39703#Septoria_lycopersici#unaffected_pathogenicity	43.622	0	569
AR4307g6123	Q9C2Y1#PHI:278__PHI:1028#BCPME1__bcpme1#40559#Botrytis_cinerea#unaffected_pathogenicity__reduced_virulence	43.62	1.39e-75	249
AR4307g94	Q32WF7#PHI:2269#Mdh1#13684#Parastagonospora_nodorum#unaffected_pathogenicity	43.609	2.42e-69	217
AR4307g7230	Q4WR83#PHI:2321#SidI#746128#Aspergillus_fumigatus#reduced_virulence	43.607	2.33e-165	486
AR4307g8739	G4MWP4#PHI:5624#FZC30#318829#Magnaporthe_oryzae#unaffected_pathogenicity	43.601	3.66e-175	536
AR4307g798	A0A1C3YMR1#PHI:5788#Fgsg03215#5518#Fusarium_graminearum#unaffected_pathogenicity	43.59	8.78e-28	103
AR4307g8983	W5ZQ93#PHI:3417#Ohmm#176275#Beauveria_bassiana#increased_virulence_(hypervirulence)	43.544	2.94e-106	339
AR4307g11564	A0A098DM90#PHI:5864#GCD12#5518#Fusarium_graminearum#unaffected_pathogenicity	43.532	1.76e-119	357
AR4307g606	W7N2A8#PHI:3383#FVEG_12531#117187#Fusarium_verticillioides#unaffected_pathogenicity	43.514	3.93e-96	308
AR4307g4579	Q8TG07#PHI:3600#plb1#5478#Candida_glabrata#unaffected_pathogenicity	43.509	1.65e-148	447
AR4307g7526	Q4WV27#PHI:7755__PHI:8601#cofilin_(AFUA_5G10570)__co<U+FB01>lin_(AFUA_5G10570)#746128#Aspergillus_fumigatus#unaffected_pathogenicity__reduced_virulence	43.506	2.21e-36	124
AR4307g1689	C6ZRH8#PHI:2976#CgOPT1#474922#Colletotrichum_gloeosporioides#reduced_virulence	43.498	0	616
AR4307g11129	A0A1C3YJF1#PHI:5804#Fgsg05006#5518#Fusarium_graminearum#unaffected_pathogenicity	43.455	1.91e-144	432
AR4307g10487	I1RQU8#PHI:1714#GzZC029#5518#Fusarium_graminearum#lethal	43.446	1.63e-175	523
AR4307g12725	A0A0A2KRU1#PHI:6881#laeA#27334#Penicillium_expansum#reduced_virulence	43.434	5.07e-18	80.5
AR4307g10631	F9X691#PHI:4914#ZtCBR1#1047171#Zymoseptoria_tritici#reduced_virulence	43.431	8.41e-74	236
AR4307g4592	I1RHQ1#PHI:7651#FgPR-IL-4#5518#Fusarium_graminearum#reduced_virulence	43.426	2.22e-51	168
AR4307g8602	I1S0N5#PHI:1552#GzMyb016#5518#Fusarium_graminearum#unaffected_pathogenicity	43.408	3.11e-71	259
AR4307g6124	W7N2A8#PHI:3383#FVEG_12531#117187#Fusarium_verticillioides#unaffected_pathogenicity	43.396	8.83e-101	312
AR4307g4364	I1S6B4#PHI:1732#GzZC047#5518#Fusarium_graminearum#unaffected_pathogenicity	43.388	1.43e-59	199
AR4307g1254	Q5AJ90#PHI:3688#Fox3p#5476#Candida_albicans#unaffected_pathogenicity	43.373	3.99e-96	301
AR4307g5282	A7F946#PHI:2411#Ss-ggt1#5180#Sclerotinia_sclerotiorum#reduced_virulence	43.37	1.69e-97	307
AR4307g11555	I1S487#PHI:1750#GzZC065#5518#Fusarium_graminearum#unaffected_pathogenicity	43.369	8.95e-60	215
AR4307g3659	O93841#PHI:243#CHIP6#474922#Colletotrichum_gloeosporioides#reduced_virulence	43.362	0	628
AR4307g1406	I1RLI0#PHI:1716#GzZC031#5518#Fusarium_graminearum#unaffected_pathogenicity	43.355	5.58e-150	458
AR4307g364	Q32WF7#PHI:2269#Mdh1#13684#Parastagonospora_nodorum#unaffected_pathogenicity	43.346	2.96e-61	196
AR4307g8830	I1S7L4#PHI:1430#GzC2H098#5518#Fusarium_graminearum#unaffected_pathogenicity	43.32	6.83e-60	206
AR4307g723	G4N1P8#PHI:5440#ABA4#318829#Magnaporthe_oryzae#reduced_virulence	43.307	4.04e-61	198
AR4307g10517	G4MVC5#PHI:6927#MoRAD6#318829#Magnaporthe_oryzae#reduced_virulence	43.307	6.91e-34	117
AR4307g7867	J9VNE4#PHI:7828#Uxt1#5207#Cryptococcus_neoformans#reduced_virulence__unaffected_pathogenicity	43.275	1.25e-86	269
AR4307g6548	I1S0N5#PHI:1552#GzMyb016#5518#Fusarium_graminearum#unaffected_pathogenicity	43.218	1.4e-75	274
AR4307g5197	A4ZGP3#PHI:1161#MgMfs1#1047171#Zymoseptoria_tritici#chemistry_target:_sensitivity_to_chemical__unaffected_pathogenicity	43.195	4.1e-144	428
AR4307g5450	I1S1Q9#PHI:1786#GzZC101#5518#Fusarium_graminearum#unaffected_pathogenicity	43.187	6.84e-119	359
AR4307g12459	Q3Y5V5#PHI:1018__PHI:2042#ABC3#318829#Magnaporthe_oryzae#loss_of_pathogenicity	43.167	0	1106
AR4307g1418	J9VNZ8#PHI:3528#PHO89#5207#Cryptococcus_neoformans#reduced_virulence	43.167	8.5e-151	449
AR4307g5214	J4WD57#PHI:7593#VVD#176275#Beauveria_bassiana#reduced_virulence	43.147	1.41e-53	171
AR4307g6281	I1S2J6#PHI:9039#fgm2_(FGSG_10992)#5518#Fusarium_graminearum#reduced_virulence	43.137	1.11e-74	234
AR4307g141	I1S3J7#PHI:1424#GzC2H092#5518#Fusarium_graminearum#unaffected_pathogenicity	43.137	1.2e-41	150
AR4307g147	I1S1D6#PHI:1754#GzZC069#5518#Fusarium_graminearum#unaffected_pathogenicity	43.071	6.7e-65	211
AR4307g3867	Q3Y5V5#PHI:1018__PHI:2042#ABC3#318829#Magnaporthe_oryzae#loss_of_pathogenicity	43.061	0	1094
AR4307g4284	I1S780#PHI:1741#GzZC056#5518#Fusarium_graminearum#unaffected_pathogenicity	43.056	1.64e-56	197
AR4307g9537	A0A151V4F3#PHI:6391#CDA2#318829#Magnaporthe_oryzae#unaffected_pathogenicity	43.031	1.39e-136	410
AR4307g9851	I1RUC7#PHI:1260#FGSG_07816#5518#Fusarium_graminearum#unaffected_pathogenicity	43.023	1.91e-11	59.3
AR4307g11768	Q6Y392#PHI:1085#Ptr2#13684#Parastagonospora_nodorum#unaffected_pathogenicity	43.004	4.76e-131	395
AR4307g3114	I1RMP5#PHI:5806#Fgsg05239#5518#Fusarium_graminearum#unaffected_pathogenicity	42.959	2.11e-106	326
AR4307g9218	A0A0A2JPI4#PHI:8719#PePpi#27334#Penicillium_expansum#unaffected_pathogenicity	42.958	1.89e-48	163
AR4307g9045	I1SA30#PHI:1436#GzC2H105#5518#Fusarium_graminearum#reduced_virulence	42.951	2.09e-67	228
AR4307g1558	I1RIQ3#PHI:1575#GzOB015#5518#Fusarium_graminearum#unaffected_pathogenicity	42.932	1.77e-38	138
AR4307g2841	I1RR34#PHI:5835#Fgsg06541#5518#Fusarium_graminearum#unaffected_pathogenicity	42.927	4.63e-111	334
AR4307g1981	Q5A7M9#PHI:4992#rhr2#5476#Candida_albicans#reduced_virulence	42.925	2e-47	159
AR4307g1807	Q882F5#PHI:7788#AldB_(PSPTO_2673)#317#Pseudomonas_syringae#reduced_virulence	42.917	8.4e-130	389
AR4307g7341	I1RIH3#PHI:1710#GzZC025#5518#Fusarium_graminearum#unaffected_pathogenicity	42.899	1.57e-156	471
AR4307g12918	Q9C441#PHI:223#PEP1#140110#Nectria_haematococca#reduced_virulence	42.857	1.1e-69	224
AR4307g7102	Q71XE6#PHI:6137__PHI:7070#PrsA2__prsA2#1639#Listeria_monocytogenes#reduced_virulence__unaffected_pathogenicity	42.857	4.56e-14	65.9
AR4307g4384	G4NDE1#PHI:1017__PHI:2067#ABC4#318829#Magnaporthe_oryzae#reduced_virulence__loss_of_pathogenicity	42.857	5.06e-12	60.8
AR4307g7931	I1RHA1#PHI:1270#FGSG_03146#5518#Fusarium_graminearum#unaffected_pathogenicity	42.857	3.19e-11	56.2
AR4307g5890	G4MR15#PHI:2088#Moatg27#318829#Magnaporthe_oryzae#unaffected_pathogenicity	42.821	2.82e-94	287
AR4307g4185	I1RFK9#PHI:1269#FGSG_02488#5518#Fusarium_graminearum#unaffected_pathogenicity	42.82	1.58e-94	305
AR4307g6921	Q9UW18#PHI:469#TOXG#5017#Bipolaris_zeicola#reduced_virulence	42.814	1.92e-90	280
AR4307g7420	P03962#PHI:506#URA3#4932#Saccharomyces_cerevisiae#reduced_virulence	42.804	3.28e-64	203
AR4307g9453	U3PW09#PHI:7047#Aqp1#5207#Cryptococcus_neoformans#unaffected_pathogenicity	42.8	3.53e-62	201
AR4307g10467	I1S3I1#PHI:1857#GzZC172#5518#Fusarium_graminearum#unaffected_pathogenicity	42.78	0	577
AR4307g648	G1UA02#PHI:2819#CaEss1#5476#Candida_albicans#reduced_virulence	42.775	8.53e-43	143
AR4307g6110	W7N2B4#PHI:3381#FVEG_12533#117187#Fusarium_verticillioides#unaffected_pathogenicity	42.775	9.33e-34	129
AR4307g10051	Q882F5#PHI:7788#AldB_(PSPTO_2673)#317#Pseudomonas_syringae#reduced_virulence	42.737	1.82e-133	398
AR4307g4925	J9VQQ5#PHI:7208#mlh1#5207#Cryptococcus_neoformans#unaffected_pathogenicity	42.691	0	576
AR4307g3965	F9XFI6#PHI:8596#ZtPks7#1047171#Zymoseptoria_tritici#unaffected_pathogenicity	42.678	0	1873
AR4307g10262	I1RG94#PHI:1322#GzbZIP004#5518#Fusarium_graminearum#unaffected_pathogenicity	42.667	7.55e-14	69.3
AR4307g10873	A0A1C3YMS1#PHI:5868#Fgsg12463#5518#Fusarium_graminearum#unaffected_pathogenicity	42.655	5.96e-90	281
AR4307g6634	O93841#PHI:243#CHIP6#474922#Colletotrichum_gloeosporioides#reduced_virulence	42.652	3.09e-147	458
AR4307g8629	I1RNY0#PHI:1893#GzZC208#5518#Fusarium_graminearum#unaffected_pathogenicity	42.65	1e-117	380
AR4307g4813	G4MSY9#PHI:8648#Poime4_(MGG_01492)#318829#Magnaporthe_oryzae#reduced_virulence	42.627	2.55e-93	285
AR4307g1637	I1REJ1#PHI:1662#GzCCHC002#5518#Fusarium_graminearum#unaffected_pathogenicity	42.614	1.39e-75	253
AR4307g4166	B0YAP6#PHI:2297#tmpL#746128#Aspergillus_fumigatus#reduced_virulence	42.604	0	602
AR4307g242	G4N6P7#PHI:6902#MoAtg14#318829#Magnaporthe_oryzae#loss_of_pathogenicity	42.601	3.68e-112	341
AR4307g11998	I1S0N2#PHI:1849#GzZC164#5518#Fusarium_graminearum#unaffected_pathogenicity	42.6	7.52e-164	498
AR4307g8782	Q4WQ36#PHI:6751#Fbx23#746128#Aspergillus_fumigatus#increased_virulence_(hypervirulence)	42.6	1.42e-159	495
AR4307g9376	G4N7X4#PHI:6614#Mocapn7#318829#Magnaporthe_oryzae#reduced_virulence	42.593	0	663
AR4307g3451	Q59TZ8#PHI:8971#Caglk1#5476#Candida_albicans#reduced_virulence__unaffected_pathogenicity	42.574	3.17e-120	368
AR4307g2990	G4NJH9#PHI:6639#Modnm3#318829#Magnaporthe_oryzae#unaffected_pathogenicity	42.561	2.23e-62	211
AR4307g3167	I1S1A5#PHI:1755#GzZC070#5518#Fusarium_graminearum#unaffected_pathogenicity	42.495	3.1e-135	411
AR4307g972	I1RXE8#PHI:1763#GzZC078#5518#Fusarium_graminearum#unaffected_pathogenicity	42.476	4.62e-172	512
AR4307g12284	Q8ZM34#PHI:8810#STM3122#28901#Salmonella_enterica#reduced_virulence	42.466	2.29e-35	128
AR4307g1368	Q63IP8#PHI:6885#BPSS2021#28450#Burkholderia_pseudomallei#reduced_virulence	42.459	2.77e-107	332
AR4307g327	Q9P927#PHI:368#NOT4#5476#Candida_albicans#reduced_virulence	42.442	1.18e-77	269
AR4307g11790	G4MSV0#PHI:875#MGG_04587#318829#Magnaporthe_oryzae#loss_of_pathogenicity	42.434	0	783
AR4307g10242	Q58Z64#PHI:423#VAD1#5207#Cryptococcus_neoformans#reduced_virulence	42.432	7.15e-96	301
AR4307g5468	I1S2J9#PHI:3924__PHI:8224__PHI:9036#FgABC1__Fg10995__fgm5_(FGSG_10995)#5518#Fusarium_graminearum#reduced_virulence	42.424	3.6e-78	285
AR4307g8594	I1REW1#PHI:1809#GzZC124#5518#Fusarium_graminearum#lethal	42.424	4.95e-45	159
AR4307g6774	I1S170#PHI:1852#GzZC167#5518#Fusarium_graminearum#unaffected_pathogenicity	42.411	1.59e-46	165
AR4307g6692	A0A095CIZ4#PHI:6188#Ubp5#552467#Cryptococcus_gattii_vgiii#reduced_virulence	42.405	0	830
AR4307g12097	I1RCK1#PHI:1352#GzC2H012#5518#Fusarium_graminearum#unaffected_pathogenicity	42.324	0	904
AR4307g12224	Q9UW03#PHI:202__PHI:1160__PHI:2309#BcatrB#40559#Botrytis_cinerea#unaffected_pathogenicity__reduced_virulence__chemistry_target:_sensitivity_to_chemical	42.316	0	1129
AR4307g8759	Q0E4W1#PHI:6181#Bcmimp1#40559#Botrytis_cinerea#unaffected_pathogenicity	42.298	2.36e-73	236
AR4307g5789	I1RC95#PHI:1566#GzOB006#5518#Fusarium_graminearum#lethal	42.276	8.58e-53	187
AR4307g6275	Q5NH02#PHI:4732#FTT0673p/prsAp#263#Francisella_tularensis#unaffected_pathogenicity	42.271	5.88e-84	258
AR4307g3599	I1R9T1#PHI:1341#GzC2H001#5518#Fusarium_graminearum#unaffected_pathogenicity	42.222	8e-16	70.9
AR4307g5658	Q9X4G0#PHI:5042#hmgA#287#Pseudomonas_aeruginosa#increased_virulence_(hypervirulence)__reduced_virulence	42.217	2.29e-112	342
AR4307g9240	I1RXD4#PHI:1596#GzOB036#5518#Fusarium_graminearum#unaffected_pathogenicity	42.175	4.41e-66	214
AR4307g624	Q99324#PHI:191#TOM1#39703#Septoria_lycopersici#unaffected_pathogenicity	42.138	2.61e-35	130
AR4307g1599	G8BJ74#PHI:6075#och1#5480#Candida_parapsilosis#reduced_virulence	42.133	3.91e-93	285
AR4307g7409	Q882F5#PHI:7788#AldB_(PSPTO_2673)#317#Pseudomonas_syringae#reduced_virulence	42.083	3.61e-122	369
AR4307g3041	I1RMT3#PHI:1664#GzCCHC004#5518#Fusarium_graminearum#unaffected_pathogenicity	42.029	1.89e-65	229
AR4307g8485	I1RC95#PHI:1566#GzOB006#5518#Fusarium_graminearum#lethal	42.025	8.37e-96	300
AR4307g8736	Q882F5#PHI:7788#AldB_(PSPTO_2673)#317#Pseudomonas_syringae#reduced_virulence	42.017	4.01e-125	376
AR4307g3164	Q882F5#PHI:7788#AldB_(PSPTO_2673)#317#Pseudomonas_syringae#reduced_virulence	42.017	8.19e-113	346
AR4307g3096	Q5A5P7#PHI:4891#orf19.5352#5476#Candida_albicans#unaffected_pathogenicity	41.946	7.4e-72	237
AR4307g2087	I1RE91#PHI:8925#FgPLD2_(FGSG_01973)#5518#Fusarium_graminearum#unaffected_pathogenicity	41.943	0	613
AR4307g831	Q8MPM3#PHI:8028#Tkt#5665#Leishmania_mexicana#loss_of_pathogenicity	41.935	2.28e-169	504
AR4307g5976	Q9C2Y1#PHI:278__PHI:1028#BCPME1__bcpme1#40559#Botrytis_cinerea#unaffected_pathogenicity__reduced_virulence	41.925	3.1e-75	237
AR4307g1848	A0A290WH42#PHI:7707#VEDA_05197#27337#Verticillium_dahliae#reduced_virulence__unaffected_pathogenicity__increased_virulence_(hypervirulence)	41.916	2e-72	230
AR4307g3222	Q99324#PHI:191#TOM1#39703#Septoria_lycopersici#unaffected_pathogenicity	41.892	0	584
AR4307g3055	P0AA28#PHI:2644#thioredoxin_1#28901#Salmonella_enterica#reduced_virulence	41.892	1.96e-17	72.8
AR4307g4344	I1S2J3#PHI:9041#fgm9_(FGSG_10989)#5518#Fusarium_graminearum#reduced_virulence	41.892	3.35e-12	59.3
AR4307g10577	G4N740#PHI:4024#MoST1#318829#Magnaporthe_oryzae#unaffected_pathogenicity	41.889	2.61e-117	360
AR4307g10450	T2C913#PHI:3225#Ndo1#36651#Penicillium_digitatum#unaffected_pathogenicity	41.866	9.34e-123	364
AR4307g3024	Q59VQ3#PHI:262#MAD2#5476#Candida_albicans#reduced_virulence	41.86	9.85e-55	176
AR4307g11927	G4MLK2#PHI:8040__PHI:8047#Mouba2__Uba2#318829#Magnaporthe_oryzae#reduced_virulence	41.86	1.58e-43	161
AR4307g10363	P07637#PHI:2624__PHI:6460__PHI:6586#aroA#28901#Salmonella_enterica#reduced_virulence	41.855	4.04e-80	271
AR4307g8392	I1RN15#PHI:1456#GzAra004#5518#Fusarium_graminearum#unaffected_pathogenicity	41.852	6.76e-125	385
AR4307g5479	Q99324#PHI:191#TOM1#39703#Septoria_lycopersici#unaffected_pathogenicity	41.822	0	560
AR4307g2089	Q87W07#PHI:7337#HopI1#318829#Magnaporthe_oryzae#effector_(plant_avirulence_determinant)	41.791	5.25e-10	60.8
AR4307g4854	Q2YPX3#PHI:8922#lon#235#Brucella_abortus#unaffected_pathogenicity__reduced_virulence	41.753	3.23e-171	527
AR4307g4177	I1S0H5#PHI:7717#FgOXP1#5518#Fusarium_graminearum#reduced_virulence	41.753	1.08e-34	129
AR4307g2792	G4MVC5#PHI:6927#MoRAD6#318829#Magnaporthe_oryzae#reduced_virulence	41.748	2.8e-26	98.6
AR4307g9504	G2X6V8#PHI:6331#VdCYP1#27337#Verticillium_dahliae#loss_of_pathogenicity	41.734	9.99e-85	276
AR4307g1047	Q92217#PHI:55#PKS1#5016#Bipolaris_maydis#reduced_virulence	41.7	2.54e-50	182
AR4307g8909	A0A098DRE2#PHI:5846#Fgsg07655#5518#Fusarium_graminearum#unaffected_pathogenicity	41.667	1.48e-79	247
AR4307g1079	Q4WUL6#PHI:362__PHI:2520#LYSF__LYS4#746128#Aspergillus_fumigatus#loss_of_pathogenicity__lethal	41.667	3.89e-12	65.9
AR4307g4216	I1S2C4#PHI:5068#MCC#5518#Fusarium_graminearum#reduced_virulence	41.649	7.33e-102	345
AR4307g5541	I1S2C4#PHI:5068#MCC#5518#Fusarium_graminearum#reduced_virulence	41.63	7.16e-103	347
AR4307g3962	I1RDG6#PHI:1555#GzMyb019#5518#Fusarium_graminearum#unaffected_pathogenicity	41.616	3.2e-137	410
AR4307g1770	Q88BC5#PHI:7787#AldA_(PSPTO_0092)#317#Pseudomonas_syringae#reduced_virulence	41.615	8.6e-112	342
AR4307g3378	G4MVX4#PHI:3216#MoCDIP4#318829#Magnaporthe_oryzae#effector_(plant_avirulence_determinant)	41.593	4.98e-38	139
AR4307g9055	I1RNA9#PHI:1508#GzHOME003#5518#Fusarium_graminearum#unaffected_pathogenicity	41.558	4.2e-86	292
AR4307g1469	G4NHC2#PHI:5034#MoADH1#318829#Magnaporthe_oryzae#unaffected_pathogenicity	41.551	2.85e-81	254
AR4307g9183	Q58Z64#PHI:423#VAD1#5207#Cryptococcus_neoformans#reduced_virulence	41.53	9.92e-89	283
AR4307g8483	I1S9C7#PHI:1726#GzZC041#5518#Fusarium_graminearum#unaffected_pathogenicity	41.53	1.14e-24	102
AR4307g5875	I1RD70#PHI:1264#FGSG_01559#5518#Fusarium_graminearum#unaffected_pathogenicity	41.515	3.15e-77	241
AR4307g11597	I1RZZ5#PHI:1415#GzC2H082#5518#Fusarium_graminearum#unaffected_pathogenicity	41.506	0	672
AR4307g12820	G2XJR0#PHI:8670#ACC_deaminase_(VDAG_10392)#27337#Verticillium_dahliae#reduced_virulence__increased_virulence_(hypervirulence)	41.504	2.07e-91	279
AR4307g9863	P87199#PHI:465#KIN2#5270#Ustilago_maydis#reduced_virulence	41.504	5.23e-65	239
AR4307g5625	I1S053#PHI:1772#GzZC087#5518#Fusarium_graminearum#reduced_virulence	41.5	9.78e-46	159
AR4307g4508	D3QJB2#PHI:3526#lacA#28901#Salmonella_enterica#reduced_virulence	41.451	2.69e-45	151
AR4307g4636	G4N0E4#PHI:4056#Ldp1#318829#Magnaporthe_oryzae#unaffected_pathogenicity	41.445	1.71e-118	374
AR4307g5989	I1RUX5#PHI:1804#GzZC119#5518#Fusarium_graminearum#unaffected_pathogenicity	41.403	4.62e-116	372
AR4307g861	Q882F5#PHI:7788#AldB_(PSPTO_2673)#317#Pseudomonas_syringae#reduced_virulence	41.387	1.53e-121	367
AR4307g615	I1S914#PHI:1721#GzZC036#5518#Fusarium_graminearum#unaffected_pathogenicity	41.379	2.82e-61	204
AR4307g11415	I1RXJ3#PHI:1851#GzZC166#5518#Fusarium_graminearum#lethal	41.358	6e-133	422
AR4307g4038	I1RG94#PHI:1322#GzbZIP004#5518#Fusarium_graminearum#unaffected_pathogenicity	41.333	1.62e-12	66.6
AR4307g7382	E0SGC8#PHI:8570#metB_(Dda3937_03888)#204038#Dickeya_dadantii#reduced_virulence	41.316	5.12e-86	269
AR4307g10597	I1RHA1#PHI:1270#FGSG_03146#5518#Fusarium_graminearum#unaffected_pathogenicity	41.311	3.35e-75	239
AR4307g5121	P28873#PHI:26#CaMDR1#5476#Candida_albicans#reduced_virulence	41.3	3.61e-116	360
AR4307g8695	G4MWX1#PHI:7134#MoRab5B#318829#Magnaporthe_oryzae#reduced_virulence	41.294	6.15e-47	156
AR4307g10444	P06618#PHI:4171#iaaH-1#29438#Pseudomonas_savastanoi#reduced_virulence	41.29	9.35e-20	90.1
AR4307g6109	I1RIY6#PHI:1841#GzZC156#5518#Fusarium_graminearum#unaffected_pathogenicity	41.284	7.91e-57	191
AR4307g7345	Q5A2T6#PHI:513#ARN1_(SIT1)#5476#Candida_albicans#unaffected_pathogenicity__reduced_virulence	41.281	2.82e-61	219
AR4307g8196	G4NIB5#PHI:812#MGG_10702#318829#Magnaporthe_oryzae#reduced_virulence	41.257	4.97e-80	268
AR4307g9494	J4KNV2#PHI:6644#CIA30#176275#Beauveria_bassiana#increased_virulence_(hypervirulence)	41.237	1.96e-40	140
AR4307g8077	Q4WN33#PHI:7165#AceA#746128#Aspergillus_fumigatus#reduced_virulence	41.221	2.91e-51	187
AR4307g8770	A0A290WH42#PHI:7707#VEDA_05197#27337#Verticillium_dahliae#reduced_virulence__unaffected_pathogenicity__increased_virulence_(hypervirulence)	41.195	7.38e-72	228
AR4307g7270	Q9X4G0#PHI:5042#hmgA#287#Pseudomonas_aeruginosa#increased_virulence_(hypervirulence)__reduced_virulence	41.19	7.23e-105	322
AR4307g5688	I1RIL1#PHI:1835#GzZC150#5518#Fusarium_graminearum#unaffected_pathogenicity	41.168	3.9e-165	506
AR4307g6224	Q32WF7#PHI:2269#Mdh1#13684#Parastagonospora_nodorum#unaffected_pathogenicity	41.132	7.21e-56	185
AR4307g5049	I1RNJ6#PHI:5784#Fgsg05579#5518#Fusarium_graminearum#unaffected_pathogenicity	41.129	3.08e-58	190
AR4307g6307	I1RRD2#PHI:1328#GzbZIP010#5518#Fusarium_graminearum#reduced_virulence	41.111	2.19e-11	63.9
AR4307g986	I1S2K0#PHI:9044#FGSG_10996#5518#Fusarium_graminearum#unaffected_pathogenicity	41.102	1.56e-148	447
AR4307g9900	E3QNW8#PHI:6228#KRE6#31870#Colletotrichum_graminicola#reduced_virulence	41.089	7.24e-100	307
AR4307g1414	I1RFD7#PHI:1969#GzZC284#5518#Fusarium_graminearum#unaffected_pathogenicity	41.067	6.4e-111	338
AR4307g826	G4MLZ9#PHI:5633#FZC38#318829#Magnaporthe_oryzae#unaffected_pathogenicity	41.064	1.59e-168	502
AR4307g12285	P29138#PHI:4615#Pr1#5530#Metarhizium_anisopliae#unaffected_pathogenicity	41.063	6.18e-89	276
AR4307g11338	Q5ZVD8#PHI:6520#LpdA#446#Legionella_pneumophila#effector_(plant_avirulence_determinant)	41.048	1.21e-106	328
AR4307g4602	I1S3N8#PHI:2451#FAEB1#5518#Fusarium_graminearum#unaffected_pathogenicity	41.034	1.28e-65	211
AR4307g11849	A5IXN3#PHI:4610#pdhB#2110#Mycoplasma_agalactiae#reduced_virulence	41.026	5.56e-69	222
AR4307g577	G4N606#PHI:5632#FZC37#318829#Magnaporthe_oryzae#unaffected_pathogenicity	40.992	2.92e-71	242
AR4307g6760	Q4WX65#PHI:2540#IPP1#746128#Aspergillus_fumigatus#lethal	40.972	2.54e-68	220
AR4307g6910	J9N257#PHI:2284__PHI:3438#Msb2#5507#Fusarium_oxysporum#reduced_virulence__loss_of_pathogenicity__unaffected_pathogenicity	40.956	0	611
AR4307g1320	A0A0E0S4Y7#PHI:8646#FgLDHL2_(FGSG_16220)#5518#Fusarium_graminearum#reduced_virulence	40.952	2.85e-18	79
AR4307g4522	I1R983#PHI:1992#GzZC307#5518#Fusarium_graminearum#unaffected_pathogenicity	40.948	4.73e-40	157
AR4307g12207	I1RGI7#PHI:1946#GzZC261#5518#Fusarium_graminearum#unaffected_pathogenicity	40.921	4.25e-104	321
AR4307g9131	G4MQZ2#PHI:2038#Mir1#318829#Magnaporthe_oryzae#unaffected_pathogenicity	40.893	1.52e-59	196
AR4307g2914	Q00903#PHI:24#Avenacinase#29850#Gaeumannomyces_graminis#unaffected_pathogenicity__loss_of_pathogenicity	40.876	2.25e-157	484
AR4307g12025	A0A290WH42#PHI:7707#VEDA_05197#27337#Verticillium_dahliae#reduced_virulence__unaffected_pathogenicity__increased_virulence_(hypervirulence)	40.845	2.47e-59	197
AR4307g10525	Q4WUL6#PHI:362__PHI:2520#LYSF__LYS4#746128#Aspergillus_fumigatus#loss_of_pathogenicity__lethal	40.845	7.45e-24	95.9
AR4307g1437	I1RX03#PHI:3985#FGSG_08844_(Sc_gpi7)#5518#Fusarium_graminearum#unaffected_pathogenicity	40.838	8.01e-19	90.9
AR4307g321	Q1KSF2#PHI:3102#BCKDH#5811#Toxoplasma_gondii#reduced_virulence	40.826	4.65e-111	338
AR4307g6263	A5IYL7#PHI:6517#adhT#2110#Mycoplasma_agalactiae#reduced_virulence	40.816	3.25e-15	72
AR4307g11660	I1RPX8#PHI:1581#GzOB021#5518#Fusarium_graminearum#unaffected_pathogenicity	40.794	1.6e-67	215
AR4307g10216	I1RNU2#PHI:1895#GzZC210#5518#Fusarium_graminearum#unaffected_pathogenicity	40.782	0	534
AR4307g28	E3QNW8#PHI:6228#KRE6#31870#Colletotrichum_graminicola#reduced_virulence	40.766	3.59e-102	314
AR4307g3408	I1RU59#PHI:1279#FGSG_07742#5518#Fusarium_graminearum#unaffected_pathogenicity	40.761	9.01e-124	395
AR4307g10044	F5B5Y4#PHI:6206#BbCypC#176275#Beauveria_bassiana#unaffected_pathogenicity	40.761	2.08e-40	136
AR4307g10333	A6QHK8#PHI:3004#ClpX#1280#Staphylococcus_aureus#reduced_virulence	40.729	2.8e-66	226
AR4307g11125	Q5H5U8#PHI:7753#AnkB_(XOO0418)#347#Xanthomonas_oryzae#reduced_virulence	40.698	3.88e-11	62.8
AR4307g1477	A0A075TRB3#PHI:3301#patN#27334#Penicillium_expansum#unaffected_pathogenicity	40.684	1.76e-60	193
AR4307g1745	Q9X4G0#PHI:5042#hmgA#287#Pseudomonas_aeruginosa#increased_virulence_(hypervirulence)__reduced_virulence	40.647	2.95e-103	317
AR4307g1006	Q96VB5#PHI:508#AFT1#5599#Alternaria_alternata#loss_of_pathogenicity	40.62	1.73e-139	419
AR4307g1811	I1RF11#PHI:5874#Fgsg02274#5518#Fusarium_graminearum#unaffected_pathogenicity	40.616	1.93e-86	267
AR4307g1377	J9VX80#PHI:4644#VPS4#5207#Cryptococcus_neoformans#loss_of_pathogenicity	40.609	1.17e-37	140
AR4307g12244	I1S780#PHI:1741#GzZC056#5518#Fusarium_graminearum#unaffected_pathogenicity	40.594	5.16e-13	67
AR4307g3625	D4I229#PHI:7094__PHI:7438#clpV-2__EAMY__3222#552#Erwinia_amylovora#reduced_virulence__unaffected_pathogenicity__increased_virulence_(hypervirulence)	40.548	1.66e-155	482
AR4307g420	J4UPL6#PHI:5394#mas5#176275#Beauveria_bassiana#loss_of_pathogenicity	40.541	6.34e-10	58.2
AR4307g4256	P0AA28#PHI:2644#thioredoxin_1#28901#Salmonella_enterica#reduced_virulence	40.541	9.18e-10	55.8
AR4307g7660	B0XUP5#PHI:3238#ctrC#746128#Aspergillus_fumigatus#unaffected_pathogenicity	40.526	2.65e-41	140
AR4307g1234	A0A290WH42#PHI:7707#VEDA_05197#27337#Verticillium_dahliae#reduced_virulence__unaffected_pathogenicity__increased_virulence_(hypervirulence)	40.525	1.08e-87	269
AR4307g1629	Q9C0P7#PHI:225#PEP5#140110#Nectria_haematococca#reduced_virulence	40.496	4.21e-50	174
AR4307g12735	G2XD68#PHI:8858#VdSSEP1_(VDAG-08100)#27337#Verticillium_dahliae#reduced_virulence	40.488	4.21e-80	275
AR4307g12686	I1S802#PHI:1672#GzCCHC012#5518#Fusarium_graminearum#unaffected_pathogenicity	40.476	7.93e-14	67.4
AR4307g9294	Q96VB5#PHI:508#AFT1#5599#Alternaria_alternata#loss_of_pathogenicity	40.455	2.27e-135	408
AR4307g12754	P57665#PHI:6274#Orn#287#Pseudomonas_aeruginosa#reduced_virulence	40.449	1.09e-33	120
AR4307g623	I1R980#PHI:2393#(O-methylsterigmatocystin_oxidoreductase)#5518#Fusarium_graminearum#increased_virulence_(hypervirulence)	40.449	1.6e-14	71.2
AR4307g3471	G4N054#PHI:2018__PHI:2106#MoPLC2__MGG_05332.5#318829#Magnaporthe_oryzae#loss_of_pathogenicity__reduced_virulence	40.444	5.92e-140	430
AR4307g4090	Q2FH26#PHI:7353#odhB#1280#Staphylococcus_aureus#unaffected_pathogenicity	40.426	7.51e-95	294
AR4307g9567	Q2I0M6#PHI:1051#CTB3#29003#Cercospora_nicotianae#reduced_virulence	40.426	4.51e-10	61.2
AR4307g5155	Q87WP3#PHI:6594#carA#317#Pseudomonas_syringae#reduced_virulence	40.42	4.64e-83	262
AR4307g6575	J4UTE1#PHI:3068#BbAC#176275#Beauveria_bassiana#reduced_virulence	40.404	1.4e-10	62.8
AR4307g9742	G4MZS1#PHI:819#MGG_07061#318829#Magnaporthe_oryzae#reduced_virulence	40.374	1.52e-149	451
AR4307g9160	Q96WM9#PHI:552#BcLCC2#40559#Botrytis_cinerea#unaffected_pathogenicity	40.365	4.93e-132	402
AR4307g12965	I1RX41#PHI:1494#MAT1-1-3#5518#Fusarium_graminearum#unaffected_pathogenicity	40.341	3.87e-41	140
AR4307g3431	I1S2C4#PHI:5068#MCC#5518#Fusarium_graminearum#reduced_virulence	40.331	5.74e-19	89.4
AR4307g4827	G4MQP9#PHI:2177#PAS1#318829#Magnaporthe_oryzae#unaffected_pathogenicity	40.328	5.87e-52	194
AR4307g5743	I1RV04#PHI:1814#GzZC129#5518#Fusarium_graminearum#lethal	40.325	1.27e-119	385
AR4307g7860	I1RM25#PHI:1579#GzOB019#5518#Fusarium_graminearum#unaffected_pathogenicity	40.323	7.11e-50	191
AR4307g2258	I1RC95#PHI:1566#GzOB006#5518#Fusarium_graminearum#lethal	40.323	4.87e-48	177
AR4307g11389	I1RW84#PHI:6183#FgVps27#5518#Fusarium_graminearum#reduced_virulence	40.31	4.33e-19	89.7
AR4307g9448	I1RVR1#PHI:1860#GzZC175#5518#Fusarium_graminearum#unaffected_pathogenicity	40.299	1.96e-23	99.4
AR4307g11061	P65882#PHI:2625#purA#28901#Salmonella_enterica#reduced_virulence	40.278	9.68e-104	317
AR4307g1442	B9XXL6#PHI:8011#rhpa#210#Helicobacter_pylori#reduced_virulence	40.274	3.81e-76	251
AR4307g8487	I1REN7#PHI:1681#GzNF001#5518#Fusarium_graminearum#unaffected_pathogenicity	40.19	0	591
AR4307g1121	G4MXR9#PHI:2089#Moatg28#318829#Magnaporthe_oryzae#unaffected_pathogenicity	40.18	3.6e-114	357
AR4307g12128	Q5ABG1#PHI:2825#SET1#5476#Candida_albicans#reduced_virulence	40.164	8.91e-18	86.3
AR4307g1915	Q4Q4W3#PHI:5554#LmABCB3#5664#Leishmania_major#reduced_virulence	40.145	6.78e-161	483
AR4307g204	I1REJ1#PHI:1662#GzCCHC002#5518#Fusarium_graminearum#unaffected_pathogenicity	40.101	2.8e-135	433
AR4307g3142	I1RHB3#PHI:1923#GzZC238#5518#Fusarium_graminearum#unaffected_pathogenicity	40.087	1.4e-160	483
AR4307g694	Q4WF54#PHI:2322#SidH#746128#Aspergillus_fumigatus#reduced_virulence	40.075	1.78e-68	215
AR4307g10794	I1RAH2#PHI:1629#GzWing001#5518#Fusarium_graminearum#unaffected_pathogenicity	40.049	7.75e-82	280
AR4307g6447	Q9HFU4#PHI:220#MAN1#5207#Cryptococcus_neoformans#reduced_virulence	40.044	4.86e-92	287
AR4307g572	D2E9W8#PHI:2377#DEP3#29001#Alternaria_brassicicola#reduced_virulence__unaffected_pathogenicity	40.039	3.66e-117	360
AR4307g5935	G4N9G6#PHI:872#MGG_03284#318829#Magnaporthe_oryzae#reduced_virulence	40.021	0	617
AR4307g6345	G4MWX1#PHI:7134#MoRab5B#318829#Magnaporthe_oryzae#reduced_virulence	40	6.01e-33	121
AR4307g6101	I1S4Q3#PHI:1756#GzZC071#5518#Fusarium_graminearum#unaffected_pathogenicity	40	1.76e-11	60.8
AR4307g7490	Q882F5#PHI:7788#AldB_(PSPTO_2673)#317#Pseudomonas_syringae#reduced_virulence	39.954	3.25e-98	306
AR4307g11552	G4NHC2#PHI:5034#MoADH1#318829#Magnaporthe_oryzae#unaffected_pathogenicity	39.94	3.07e-68	220
AR4307g7966	O93800#PHI:133#AKT1#5599#Alternaria_alternata#loss_of_pathogenicity	39.826	5.78e-140	420
AR4307g8958	Q4WLS1#PHI:2543#GCD6#746128#Aspergillus_fumigatus#lethal__loss_of_pathogenicity	39.802	8.86e-174	519
AR4307g4990	W7N0U7#PHI:7145#FvSEL1#117187#Fusarium_verticillioides#reduced_virulence	39.779	7.35e-33	123
AR4307g4035	I1SAX2#PHI:1864#GzZC179#5518#Fusarium_graminearum#unaffected_pathogenicity	39.777	1.37e-53	186
AR4307g2824	I1RJ74#PHI:1363#TRI15#5518#Fusarium_graminearum#unaffected_pathogenicity	39.759	1.64e-63	205
AR4307g5922	J9VNZ8#PHI:3528#PHO89#5207#Cryptococcus_neoformans#reduced_virulence	39.733	1.57e-140	422
AR4307g4590	G4NGA7#PHI:2032#VTL1#318829#Magnaporthe_oryzae#unaffected_pathogenicity	39.723	2.79e-113	349
AR4307g12839	P0AA28#PHI:2644#thioredoxin_1#28901#Salmonella_enterica#reduced_virulence	39.706	2.32e-11	57.4
AR4307g11645	P87199#PHI:465#KIN2#5270#Ustilago_maydis#reduced_virulence	39.645	3.36e-59	218
AR4307g3566	B8NAR1#PHI:8760#RtfA_(XP_002377748.1)#5059#Aspergillus_flavus#reduced_virulence	39.626	9.65e-110	344
AR4307g8117	I1RFK9#PHI:1269#FGSG_02488#5518#Fusarium_graminearum#unaffected_pathogenicity	39.614	2.54e-89	289
AR4307g302	G4ND25#PHI:2488#Man1#318829#Magnaporthe_oryzae#unaffected_pathogenicity	39.612	8.95e-110	345
AR4307g6103	A0A0D3LX64#PHI:4618#PcPL15#4784#Phytophthora_capsici#increased_virulence_(hypervirulence)__reduced_virulence	39.595	4.95e-78	248
AR4307g1474	A0A0D3LX64#PHI:4618#PcPL15#4784#Phytophthora_capsici#increased_virulence_(hypervirulence)__reduced_virulence	39.583	1.23e-73	248
AR4307g2851	I1RU55#PHI:1391#GzC2H054#5518#Fusarium_graminearum#unaffected_pathogenicity	39.574	3.78e-36	137
AR4307g1733	G4YQK3#PHI:6261#PsAAT3#67593#Phytophthora_sojae#reduced_virulence	39.563	1.18e-90	282
AR4307g9874	I1RIS2#PHI:5353#Famfs1#282267#Fusarium_asiaticum#reduced_virulence	39.56	1.2e-35	139
AR4307g1794	I1R9G3#PHI:1997#GzZC312#5518#Fusarium_graminearum#unaffected_pathogenicity	39.56	5.79e-13	70.5
AR4307g7715	I1RD28#PHI:1876#GzZC191#5518#Fusarium_graminearum#unaffected_pathogenicity	39.548	6.3e-66	231
AR4307g1852	Q2UEH7#PHI:6872#atrR#746128#Aspergillus_fumigatus#reduced_virulence	39.535	6.86e-23	93.2
AR4307g9729	I1S2F2#PHI:1500#GzHMG032#5518#Fusarium_graminearum#unaffected_pathogenicity	39.521	6.11e-33	137
AR4307g11203	Q4WT66#PHI:2511#Pes1#746128#Aspergillus_fumigatus#reduced_virulence	39.516	0	2623
AR4307g9909	Q9Y8A2#PHI:255#FUM1_(FUM5)#5127#Fusarium_fujikuroi#unaffected_pathogenicity	39.508	0	1330
AR4307g5463	G4NAJ0#PHI:2175#NMR3#318829#Magnaporthe_oryzae#reduced_virulence	39.49	1.58e-64	207
AR4307g3366	A0A059UDR8#PHI:2897#BEC1019#34373#Blumeria_graminis#reduced_virulence	39.474	3.96e-74	231
AR4307g12079	G4MXR2#PHI:8753__PHI:8806#MoChia1_(MGG_08054)__MoChi1_(MGG_08054)#318829#Magnaporthe_oryzae#reduced_virulence	39.43	1.33e-90	282
AR4307g10443	I1S2J6#PHI:9039#fgm2_(FGSG_10992)#5518#Fusarium_graminearum#reduced_virulence	39.404	3.77e-72	228
AR4307g11330	Q5AG40#PHI:2553#VPS4#5476#Candida_albicans#loss_of_pathogenicity	39.394	1.14e-72	246
AR4307g9793	B2SI02#PHI:1139#raxQ#347#Xanthomonas_oryzae#increased_virulence_(hypervirulence)	39.394	2.65e-17	82.4
AR4307g1462	D3W9Z8#PHI:3907#ZrfC#746128#Aspergillus_fumigatus#reduced_virulence__loss_of_pathogenicity	39.373	1.78e-111	343
AR4307g5358	A0A0A2J5T2#PHI:8718#PeCrt#27334#Penicillium_expansum#reduced_virulence	39.355	3.89e-22	100
AR4307g9715	G4N402#PHI:2107#MGG_05905.5#318829#Magnaporthe_oryzae#unaffected_pathogenicity__reduced_virulence	39.352	8.37e-90	286
AR4307g11410	A0A098DMJ4#PHI:5801#Fgsg04628#5518#Fusarium_graminearum#unaffected_pathogenicity	39.352	8.18e-37	133
AR4307g11095	I1S737#PHI:1733#GzZC048#5518#Fusarium_graminearum#unaffected_pathogenicity	39.344	7.69e-61	205
AR4307g12254	Q96VB3#PHI:509#AFT3#5599#Alternaria_alternata#loss_of_pathogenicity	39.338	7.08e-59	191
AR4307g4377	I1RKS2#PHI:717#PLSP1#5518#Fusarium_graminearum#unaffected_pathogenicity	39.338	2.49e-55	180
AR4307g11209	I1S2W8#PHI:1827#GzZC142#5518#Fusarium_graminearum#unaffected_pathogenicity	39.324	6.25e-116	359
AR4307g12800	A0A384JRT5#PHI:8606#BcXyl1#40559#Botrytis_cinerea#reduced_virulence	39.32	8.56e-42	148
AR4307g7702	G4MLZ9#PHI:5633#FZC38#318829#Magnaporthe_oryzae#unaffected_pathogenicity	39.318	2.07e-85	277
AR4307g7897	J9VNI6#PHI:7178#Ape4#5207#Cryptococcus_neoformans#reduced_virulence	39.315	2.23e-103	323
AR4307g10836	T2C913#PHI:3225#Ndo1#36651#Penicillium_digitatum#unaffected_pathogenicity	39.274	2.07e-72	233
AR4307g2939	B9XXL6#PHI:8011#rhpa#210#Helicobacter_pylori#reduced_virulence	39.255	2.85e-70	246
AR4307g1997	G4NGA7#PHI:2032#VTL1#318829#Magnaporthe_oryzae#unaffected_pathogenicity	39.243	7.36e-118	364
AR4307g7784	Q8Y8N0#PHI:6510__PHI:7620#CshA__Lmo0866#1639#Listeria_monocytogenes#unaffected_pathogenicity__increased_virulence_(hypervirulence)	39.241	2.86e-75	253
AR4307g7059	G4N4U0#PHI:887#MGG_05174#318829#Magnaporthe_oryzae#reduced_virulence	39.224	4.18e-35	130
AR4307g4392	I1RWZ1#PHI:1688#GzZC003#5518#Fusarium_graminearum#unaffected_pathogenicity	39.206	8.23e-116	361
AR4307g1015	I1S1F0#PHI:8669#FgKP4L-4_(FGSG_10551)#5518#Fusarium_graminearum#reduced_virulence	39.2	2.4e-17	74.3
AR4307g1382	Q6FM61#PHI:2570#CYB2#5478#Candida_glabrata#reduced_virulence	39.189	1.31e-92	295
AR4307g11182	G4YQK3#PHI:6261#PsAAT3#67593#Phytophthora_sojae#reduced_virulence	39.178	3.52e-84	263
AR4307g8562	A7EZM9#PHI:4509#Ss-odc2#5180#Sclerotinia_sclerotiorum#reduced_virulence	39.164	6.29e-91	285
AR4307g7199	I1RUC7#PHI:1260#FGSG_07816#5518#Fusarium_graminearum#unaffected_pathogenicity	39.161	9.19e-17	84
AR4307g8356	F9X691#PHI:4914#ZtCBR1#1047171#Zymoseptoria_tritici#reduced_virulence	39.13	7.55e-48	164
AR4307g10099	Q4WJV1#PHI:8877#gefC_(Afu1g04700)#746128#Aspergillus_fumigatus#unaffected_pathogenicity	39.12	8.63e-176	535
AR4307g12891	I1RFH1#PHI:1836#GzZC151#5518#Fusarium_graminearum#unaffected_pathogenicity	39.116	3.55e-140	427
AR4307g151	I1RHI8#PHI:6121#FGSG_03243#5518#Fusarium_graminearum#reduced_virulence	39.108	1.27e-70	235
AR4307g727	I1RUC3#PHI:1286#FGSG_07812#5518#Fusarium_graminearum#unaffected_pathogenicity	39.098	1.54e-21	95.5
AR4307g4184	J9VY90#PHI:9058#lac1#5207#Cryptococcus_neoformans#reduced_virulence	39.091	6.12e-64	222
AR4307g92	J9VNE4#PHI:7828#Uxt1#5207#Cryptococcus_neoformans#reduced_virulence__unaffected_pathogenicity	39.076	9.8e-38	137
AR4307g10193	I1R983#PHI:1992#GzZC307#5518#Fusarium_graminearum#unaffected_pathogenicity	39.073	8.12e-29	114
AR4307g9538	Q5A2T6#PHI:513#ARN1_(SIT1)#5476#Candida_albicans#unaffected_pathogenicity__reduced_virulence	39.065	2.6e-149	446
AR4307g10187	I1RFH1#PHI:1836#GzZC151#5518#Fusarium_graminearum#unaffected_pathogenicity	39.049	2.69e-145	439
AR4307g4630	G5EHQ9#PHI:2174#NMR2#318829#Magnaporthe_oryzae#reduced_virulence	39.032	9.76e-69	218
AR4307g2365	I1RFK9#PHI:1269#FGSG_02488#5518#Fusarium_graminearum#unaffected_pathogenicity	39.024	7.96e-62	202
AR4307g7269	G4N6T1#PHI:5671#FZC68#318829#Magnaporthe_oryzae#unaffected_pathogenicity	38.986	4.87e-139	430
AR4307g3874	G4NHT5#PHI:5612#FZC20#318829#Magnaporthe_oryzae#unaffected_pathogenicity	38.98	7.85e-111	347
AR4307g10718	T2C913#PHI:3225#Ndo1#36651#Penicillium_digitatum#unaffected_pathogenicity	38.978	3.57e-78	247
AR4307g3020	P0AA28#PHI:2644#thioredoxin_1#28901#Salmonella_enterica#reduced_virulence	38.961	9.74e-16	67.8
AR4307g8391	Q5ABG1#PHI:2825#SET1#5476#Candida_albicans#reduced_virulence	38.938	1.57e-12	70.5
AR4307g11673	I1S7J0#PHI:1819#GzZC134#5518#Fusarium_graminearum#unaffected_pathogenicity	38.931	2.8e-22	95.5
AR4307g1624	Q96WM9#PHI:552#BcLCC2#40559#Botrytis_cinerea#unaffected_pathogenicity	38.889	9.27e-116	358
AR4307g3206	I1R9B9#PHI:1998#GzZC313#5518#Fusarium_graminearum#unaffected_pathogenicity	38.889	4.31e-47	162
AR4307g9162	G4MVX4#PHI:3216#MoCDIP4#318829#Magnaporthe_oryzae#effector_(plant_avirulence_determinant)	38.889	3.61e-44	152
[truncated: 2,229 more rows]

## Sheet: CBS 119158
Supplementary Table 5. The BLASTP analysis of homologues of the nectriaceous species genes in PHI-base
Gene id	Subject id	% identity	evalue	bit score
g4684.t1	Q9UWF0#PHI:2108#CAM#318829#Magnaporthe_oryzae#reduced_virulence__loss_of_pathogenicity	100	6.5e-105	299
g3578.t1	Q96VA7#PHI:251#FGA1#5507#Fusarium_oxysporum#reduced_virulence	99.717	0	736
g12030.t1	I1S1V9#PHI:1604#GzOB045#5518#Fusarium_graminearum#unaffected_pathogenicity	99.31	1.51e-100	288
g7597.t1	Q9HGU2#PHI:215__PHI:2285__PHI:2827__PHI:6315__PHI:7240#FMK1__Fmk1__fmk1#5507#Fusarium_oxysporum#loss_of_pathogenicity__unaffected_pathogenicity__reduced_virulence	99.143	0	726
g6583.t1	I1RT81#PHI:6410__PHI:6604#FgCdc12__FaCdc12(FGSG_07380)#5518__282267#Fusarium_graminearum__Fusarium_asiaticum#reduced_virulence	98.961	0	792
g12038.t1	A0A0D2Y8P9#PHI:7588#Foatg8#5507#Fusarium_oxysporum#reduced_virulence	98.305	4e-81	236
g7563.t1	Q4HTT1#PHI:1468#GzCCAAT008#5518#Fusarium_graminearum#unaffected_pathogenicity	97.761	2.86e-90	261
g280.t1	I1RWQ2#PHI:1235#FGSG_08731#5518#Fusarium_graminearum#lethal	97.275	0	744
g8159.t1	I1RRW3#PHI:1658#GzCCCH002#5518#Fusarium_graminearum#unaffected_pathogenicity	96.651	1.64e-153	427
g2832.t1	I1S050#PHI:1203#(Sc_Yck1/2/3)#5518#Fusarium_graminearum#reduced_virulence	96.468	0	909
g11817.t1	I1RT36#PHI:1200__PHI:4587#(Gsk3)__Fgk3#5518#Fusarium_graminearum#reduced_virulence__loss_of_pathogenicity	96.447	0	793
g3270.t1	G4MVC5#PHI:6927#MoRAD6#318829#Magnaporthe_oryzae#reduced_virulence	96.296	4.67e-93	276
g6779.t1	I1RC52#PHI:6092#FgVps26#5518#Fusarium_graminearum#reduced_virulence	96.19	0	620
g199.t1	I1RWI5#PHI:1590#GzOB030#5518#Fusarium_graminearum#lethal	96.178	2.04e-104	298
g6419.t1	I1RAY2#PHI:1218#FGSG_00677#5518#Fusarium_graminearum#lethal	96.165	0	636
g8137.t1	P0C431#PHI:1005__PHI:2327#FgHOG1__HOG1#5518#Fusarium_graminearum#reduced_virulence__unaffected_pathogenicity	96.078	0	723
g12803.t1	I1RJP0#PHI:3833#Fgrho2#5518#Fusarium_graminearum#reduced_virulence	95.98	4.42e-143	400
g1613.t1	I1RC95#PHI:1566#GzOB006#5518#Fusarium_graminearum#lethal	95.949	0	766
g4359.t1	A0JC80#PHI:3623#RacA#35717#Epichloe_festucae#increased_virulence_(hypervirulence)	95.767	2.26e-132	381
g430.t1	I1REF2#PHI:3138#ELP3#5518#Fusarium_graminearum#reduced_virulence	95.414	0	1122
g9350.t1	I1RN81#PHI:3832#Fgcdc42#5518#Fusarium_graminearum#reduced_virulence	95.385	1.16e-137	386
g1290.t1	J4UUB6#PHI:6972#TpsA#176275#Beauveria_bassiana#reduced_virulence	95.122	0	978
g2250.t1	T0LLS6#PHI:6703#CgRhoB#474922#Colletotrichum_gloeosporioides#reduced_virulence	94.872	1.24e-135	380
g10240.t1	I1RYH0#PHI:6409#FgCdc11#5518#Fusarium_graminearum#reduced_virulence	94.709	0	691
g9571.t1	Q4IQX3#PHI:1470#GzHMG002#5518#Fusarium_graminearum#reduced_virulence	94.444	4.83e-54	166
g8135.t1	I1RYZ7#PHI:1013#GzGPA2#5518#Fusarium_graminearum#reduced_virulence	94.41	0	650
g4774.t1	A0A0D2XDM3#PHI:4724#gls1#5507#Fusarium_oxysporum#unaffected_pathogenicity	94.326	0	1370
g1408.t1	I1RSD5#PHI:1384#GzC2H047#5518#Fusarium_graminearum#reduced_virulence	94.304	4.06e-89	268
g12670.t1	J4UI12#PHI:3271#ARSEF_2860#176275#Beauveria_bassiana#reduced_virulence	93.878	4.04e-170	476
g1310.t1	I1RPQ7#PHI:6411#FgCdc10#5518#Fusarium_graminearum#unaffected_pathogenicity	93.787	0	667
g738.t1	W7M5P0#PHI:2916#Ppr2#117187#Fusarium_verticillioides#unaffected_pathogenicity	93.665	0	1220
g3457.t1	N4VQQ5#PHI:3280#CoRAS1#5465#Colletotrichum_orbiculare#lethal	93.427	1.08e-141	398
g2220.t1	I1RKK5#PHI:1289#FGSG_04416#5518#Fusarium_graminearum#unaffected_pathogenicity	93.409	0	862
g267.t1	P41388#PHI:820#beta-tubulin#5025#Venturia_inaequalis#chemistry_target:_resistance_to_chemical	93.289	0	847
g6425.t1	I1RAX7#PHI:1563#GzOB003#5518#Fusarium_graminearum#unaffected_pathogenicity	93.125	2.05e-108	312
g1307.t1	I1RPR1#PHI:2387#ACL2#5518#Fusarium_graminearum#loss_of_pathogenicity	92.843	0	927
g6468.t1	Q4IPZ1#PHI:1564#GzOB004#5518#Fusarium_graminearum#unaffected_pathogenicity	92.308	1.92e-50	156
g7264.t1	I1S219#PHI:1652#GzWing024#5518#Fusarium_graminearum#unaffected_pathogenicity	92.308	2.79e-48	160
g10268.t1	I1RXZ0#PHI:1467#GzCCAAT007#5518#Fusarium_graminearum#unaffected_pathogenicity	92.254	1.15e-90	262
g6838.t1	I1RZL3#PHI:3996#FgFim#5518#Fusarium_graminearum#reduced_virulence	92.142	0	1211
g9953.t1	I1RGD6#PHI:1193#(Sc_Sky1)#5518#Fusarium_graminearum#reduced_virulence	92.141	0	950
g5135.t1	Q4WJS6#PHI:6753#GlcA#746128#Aspergillus_fumigatus#lethal	91.867	0	619
g9561.t1	I1RA52#PHI:445#NOS1#5518#Fusarium_graminearum#reduced_virulence	91.737	0	882
g1306.t1	I1S7N4#PHI:2386#ACL1#5518#Fusarium_graminearum#loss_of_pathogenicity	91.727	0	782
g1206.t1	Q6XPX0#PHI:300__PHI:2826#FGB1__Fgb1#5507#Fusarium_oxysporum#reduced_virulence__loss_of_pathogenicity	91.667	0	719
g6806.t1	I1RN31#PHI:1223#FGSG_05393#5518#Fusarium_graminearum#lethal	91.642	0	635
g8620.t1	I1RTG5#PHI:6245#FaMyo2B#5518#Fusarium_graminearum#reduced_virulence	91.409	0	2975
g4973.t1	I1RV69#PHI:1234#FGSG_08133#5518#Fusarium_graminearum#lethal	91.197	0	4566
g1230.t1	I1RDY4#PHI:1869#GzZC184#5518#Fusarium_graminearum#unaffected_pathogenicity	91.171	0	1048
g557.t1	X0JB59#PHI:4679#FoSlt2#5507#Fusarium_oxysporum#reduced_virulence	91.101	0	793
g557.t1	X0JB59#PHI:4679#FoSlt2#5507#Fusarium_oxysporum#reduced_virulence	91.101	0	793
g4569.t1	Q4WKG5#PHI:2530#TUB1#746128#Aspergillus_fumigatus#lethal__loss_of_pathogenicity	91.091	0	840
g10046.t1	W7LTW0#PHI:3355__PHI:4514#Mads1__Fvmcm1#117187#Fusarium_verticillioides#unaffected_pathogenicity__reduced_virulence	91.071	4.46e-142	399
g3322.t1	I1S095#PHI:861#RAS2#5518#Fusarium_graminearum#reduced_virulence	91.064	1.04e-156	437
g3980.t1	U6ZIB1#PHI:7624#Vfme#1089444#Dickeya_solani#reduced_virulence__unaffected_pathogenicity	91.061	0	1358
g7456.t1	Q5YCW8#PHI:337#CHS7#5507#Fusarium_oxysporum#reduced_virulence	91.018	0	639
g176.t1	Q96VL3#PHI:339#CLPT1#290576#Colletotrichum_lindemuthianum#reduced_virulence	90.991	1.41e-66	208
g3545.t1	U6ZIB1#PHI:7624#Vfme#1089444#Dickeya_solani#reduced_virulence__unaffected_pathogenicity	90.954	0	1167
g1797.t1	I1REC7#PHI:6272#FgHSP90#5518#Fusarium_graminearum#reduced_virulence	90.922	0	1157
g11684.t1	I1RP88#PHI:1226#FGSG_05845#5518#Fusarium_graminearum#lethal	90.909	0	1196
g157.t1	I1RQ89#PHI:1641__PHI:2434#FgFlbA#5518#Fusarium_graminearum#reduced_virulence	90.702	0	931
g8840.t1	I1RCN2#PHI:1168__PHI:1171__PHI:1173#HDF1#5518#Fusarium_graminearum#reduced_virulence	90.688	0	934
g4846.t1	I1RW90#PHI:1627#GzTF2S002#5518#Fusarium_graminearum#unaffected_pathogenicity	90.654	2.59e-70	210
g3030.t1	I1S241#PHI:442#MSY1#5518#Fusarium_graminearum#reduced_virulence	90.601	0	1451
g11886.t1	I1RCH5#PHI:1569#GzOB009#5518#Fusarium_graminearum#lethal	90.588	0	635
g1637.t1	I1RCB7#PHI:1567#GzOB007#5518#Fusarium_graminearum#unaffected_pathogenicity	90.588	2.61e-116	330
g6256.t1	X0JSI1#PHI:4680#FoMkk2#5507#Fusarium_oxysporum#reduced_virulence	90.395	0	984
g11780.t1	G4N4N6#PHI:4616#MoSFA1#318829#Magnaporthe_oryzae#reduced_virulence	90.263	0	709
g6829.t1	Q4WQK8#PHI:6111#CpcB#746128#Aspergillus_fumigatus#reduced_virulence	90.19	0	611
g3274.t1	I1RMA5#PHI:4041#spt3#5518#Fusarium_graminearum#reduced_virulence	90.164	6.81e-178	505
g12343.t1	I1S0N5#PHI:1552#GzMyb016#5518#Fusarium_graminearum#unaffected_pathogenicity	90.072	0	1988
g557.t1	Q8TG19#PHI:266#MGV1#5518#Fusarium_graminearum#reduced_virulence__loss_of_pathogenicity	89.906	0	776
g557.t1	I1S0S6#PHI:1196#(Mgv1)#5518#Fusarium_graminearum#reduced_virulence	89.906	0	776
g557.t1	Q8TG19#PHI:266#MGV1#5518#Fusarium_graminearum#reduced_virulence__loss_of_pathogenicity	89.906	0	776
g557.t1	I1S0S6#PHI:1196#(Mgv1)#5518#Fusarium_graminearum#reduced_virulence	89.906	0	776
g2198.t1	I1RW16#PHI:1178__PHI:4941#(Sc_Cdc28)__cdc2A#5518#Fusarium_graminearum#reduced_virulence__lethal__loss_of_pathogenicity	89.877	0	608
g7238.t1	I1RS24#PHI:1584#GzOB024#5518#Fusarium_graminearum#unaffected_pathogenicity	89.513	5.98e-175	486
g8915.t1	Q4IQT8#PHI:1618#GzFET5#5518#Fusarium_graminearum#unaffected_pathogenicity	89.456	0	550
g10985.t1	I1RJV1#PHI:1366#GzCON7#5518#Fusarium_graminearum#reduced_virulence	89.418	0	600
g11911.t1	I1RA20#PHI:1244#FGSG_00337#5518#Fusarium_graminearum#unaffected_pathogenicity	89.32	0	770
g12276.t1	A0A016PX00#PHI:4602#FDB2#5518#Fusarium_graminearum#reduced_virulence	89.311	0	3933
g5069.t1	A0A0D2YC96#PHI:4725#gbe1#5507#Fusarium_oxysporum#unaffected_pathogenicity	89.254	0	869
g261.t1	I1RYR6#PHI:1692#GzZC007#5518#Fusarium_graminearum#unaffected_pathogenicity	89.111	0	1001
g2267.t1	I1RKH9#PHI:1177#nrc-2#5518#Fusarium_graminearum#reduced_virulence	89.07	0	1098
g6087.t1	I1RE58#PHI:443#CBL1#5518#Fusarium_graminearum#reduced_virulence	88.964	0	807
g11812.t1	I1S8E2#PHI:1606#GzOB047#5518#Fusarium_graminearum#reduced_virulence	88.889	1.37e-135	382
g8202.t1	Q5AND9#PHI:7009#arf2#5476#Candida_albicans#reduced_virulence	88.889	3.85e-119	338
g557.t1	E9ESS9#PHI:5428#Mero-Slt2#568076#Metarhizium_robertsii#loss_of_pathogenicity	88.706	0	792
g557.t1	E9ESS9#PHI:5428#Mero-Slt2#568076#Metarhizium_robertsii#loss_of_pathogenicity	88.706	0	792
g3249.t1	I1RM85#PHI:1959#GzZC274#5518#Fusarium_graminearum#unaffected_pathogenicity	88.525	0	1142
g11977.t1	W7MHG4#PHI:2462#RGSB#117187#Fusarium_verticillioides#unaffected_pathogenicity	88.525	0	679
g6406.t1	I1S4N1#PHI:1427#GzC2H095#5518#Fusarium_graminearum#unaffected_pathogenicity	88.475	3.85e-175	504
g10154.t1	I1RBF3#PHI:9056#FgTRR_(FGSG_00871)#5518#Fusarium_graminearum#reduced_virulence	88.365	0	596
g6374.t1	I1RS48#PHI:1202#(Sc_Cla4)#5518#Fusarium_graminearum#reduced_virulence	88.335	0	1395
g11783.t1	I1S0H5#PHI:7717#FgOXP1#5518#Fusarium_graminearum#reduced_virulence	88.309	0	2469
g9283.t1	G4N6S1#PHI:8610#gcn5_(MGG_03677)#318829#Magnaporthe_oryzae#reduced_virulence__unaffected_pathogenicity	88.295	0	725
g557.t1	G9DDS6#PHI:2429__PHI:5045#Bbslt2__slt2#176275#Beauveria_bassiana#reduced_virulence	88.235	0	763
g557.t1	G9DDS6#PHI:2429__PHI:5045#Bbslt2__slt2#176275#Beauveria_bassiana#reduced_virulence	88.235	0	763
g557.t1	O13352#PHI:113#MPS1#318829#Magnaporthe_oryzae#loss_of_pathogenicity	88.208	0	771
g557.t1	O13352#PHI:113#MPS1#318829#Magnaporthe_oryzae#loss_of_pathogenicity	88.208	0	771
g4481.t1	Q6QIY0#PHI:2382#Upa2#5270#Ustilago_maydis#unaffected_pathogenicity	88.119	0	573
g6302.t1	I1RRM1#PHI:5029#gta2#5518#Fusarium_graminearum#unaffected_pathogenicity__reduced_virulence	88.043	0	854
g6487.t1	I1RB37#PHI:6119#BTA1#5518#Fusarium_graminearum#reduced_virulence	87.981	0	1546
g8629.t1	I1RTF5#PHI:1532#GzLam001#5518#Fusarium_graminearum#unaffected_pathogenicity	87.898	2.23e-98	288
g6842.t1	I1RQL4#PHI:1165__PHI:1642__PHI:3109#RRG2__GzWing014__FgSKN7#5518#Fusarium_graminearum#unaffected_pathogenicity__reduced_virulence	87.879	0	1046
g11483.t1	I1RN37#PHI:1374#GzC2H037#5518#Fusarium_graminearum#unaffected_pathogenicity	87.871	0	1509
g4338.t1	I1RKR8#PHI:1175__PHI:6148#(Sc_Srb10)__FgSsn3#5518#Fusarium_graminearum#reduced_virulence	87.731	0	752
g11095.t1	I1RSF7#PHI:1385#GzC2H048#5518#Fusarium_graminearum#unaffected_pathogenicity	87.622	0	1246
g557.t1	Q8X125#PHI:263#MAF1#5462#Colletotrichum_lagenaria#reduced_virulence	87.529	0	756
g557.t1	Q8X125#PHI:263#MAF1#5462#Colletotrichum_lagenaria#reduced_virulence	87.529	0	756
g12085.t1	I1R9X6#PHI:8908#FgVPS28_(FGSG_00291)#5518#Fusarium_graminearum#reduced_virulence	87.395	3.51e-148	416
g6112.t1	I1RJT0#PHI:8913#FgVPS2_(FGSG_04112)#5518#Fusarium_graminearum#lethal	87.281	5.29e-124	354
g3921.t1	Q4HYQ4#PHI:1601#GzOB042#5518#Fusarium_graminearum#unaffected_pathogenicity	87.27	0	2432
g4946.t1	I1RFZ8#PHI:1663#GzCCHC003#5518#Fusarium_graminearum#unaffected_pathogenicity	87.19	5.7e-126	359
g11553.t1	Q00845#PHI:180#PELD#140110#Nectria_haematococca#reduced_virulence	87.124	1.22e-154	432
g557.t1	A0A1S6JYV9#PHI:7447#CpSlt2#5116#Cryphonectria_parasitica#reduced_virulence	87.119	0	760
g557.t1	A0A1S6JYV9#PHI:7447#CpSlt2#5116#Cryphonectria_parasitica#reduced_virulence	87.119	0	760
g4905.t1	Q2PEP0#PHI:576#NoxA#35717#Epichloe_festucae#enhanced_antagonism	87.074	0	1043
g4921.t1	Q4IPC8#PHI:1531__PHI:5700#GzSsu72__ScOrtholog_SSU72#5518#Fusarium_graminearum#unaffected_pathogenicity__lethal	87.059	2.07e-172	479
g9304.t1	I1RK16#PHI:1833#GzZC148#5518#Fusarium_graminearum#unaffected_pathogenicity	87.013	0	931
g6524.t1	I1RB71#PHI:1630#GzWing002#5518#Fusarium_graminearum#unaffected_pathogenicity	86.979	0	708
g6095.t1	I1RE51#PHI:1542#GzMyb006#5518#Fusarium_graminearum#unaffected_pathogenicity	86.834	0	1174
g4632.t1	I1RA06#PHI:6258#DHS#5518#Fusarium_graminearum#increased_virulence_(hypervirulence)__unaffected_pathogenicity	86.792	0	677
g165.t1	I1RQ81#PHI:1582#GzOB022#5518#Fusarium_graminearum#unaffected_pathogenicity	86.774	0	566
g8187.t1	I1RBR4#PHI:2908#Cyp51B#5518#Fusarium_graminearum#unaffected_pathogenicity__reduced_virulence	86.717	0	943
g3320.t1	I1S097#PHI:4660#Chs3b#5518#Fusarium_graminearum#lethal__reduced_virulence	86.63	0	1572
g10177.t1	I1RVY6#PHI:1401#GzC2H064#5518#Fusarium_graminearum#unaffected_pathogenicity	86.621	0	753
g5968.t1	I1RPV7#PHI:1227#FGSG_06089#5518#Fusarium_graminearum#lethal	86.619	0	7048
g3555.t1	I1RWT7#PHI:1793#GzZC108#5518#Fusarium_graminearum#reduced_virulence	86.578	0	1363
g10999.t1	I1RJT8#PHI:8909#FgVPS22_(FGSG_04120)#5518#Fusarium_graminearum#reduced_virulence	86.364	1.16e-100	293
g7271.t1	Q2PEN8#PHI:577#NoxB#35717#Epichloe_festucae#unaffected_pathogenicity	86.332	0	1053
g8323.t1	I1S7F8#PHI:1553#GzMyb017#5518#Fusarium_graminearum#reduced_virulence	86.223	0	705
g12546.t1	I1RZX9#PHI:1014#GzGPA3#5518#Fusarium_graminearum#unaffected_pathogenicity	86.197	0	652
g8768.t1	I1RG99#PHI:6091#FgVps35#5518#Fusarium_graminearum#reduced_virulence	86.132	0	1602
g3920.t1	I1RZQ2#PHI:1004__PHI:1179__PHI:3377#STE7__(Sc_Ste7)__FgSte7#5518#Fusarium_graminearum#loss_of_pathogenicity__reduced_virulence	86.127	0	851
g9298.t1	G4MR98#PHI:2044#MoSOM1#318829#Magnaporthe_oryzae#loss_of_pathogenicity	86.111	6.93e-11	64.7
g220.t1	I1RWG6#PHI:1187#(Sc_Dbf2/Dbf20)#5518#Fusarium_graminearum#reduced_virulence	86.103	0	1205
g11348.t1	J9MZK9#PHI:2455#CRE1#5507#Fusarium_oxysporum#unaffected_pathogenicity	86.085	0	689
g8692.t1	E9DS54#PHI:8769#MaPpt1#92637#Metarhizium_acridum#unaffected_pathogenicity	86.076	0	883
g11463.t1	I1RM25#PHI:1579#GzOB019#5518#Fusarium_graminearum#unaffected_pathogenicity	86.027	0	2070
g8663.t1	I1RTC2#PHI:1232#FGSG_07423#5518#Fusarium_graminearum#lethal	86.024	0	732
g4853.t1	I1RWP4#PHI:1530#Gzsnd#5518#Fusarium_graminearum#unaffected_pathogenicity	85.989	0	1576
g6062.t1	I1RE76#PHI:1571#GzOB011#5518#Fusarium_graminearum#unaffected_pathogenicity	85.987	4.7e-100	288
g6272.t1	I1RT19#PHI:1387#GzBrlA#5518#Fusarium_graminearum#unaffected_pathogenicity	85.935	0	1167
g5843.t1	I1RC32#PHI:2351__PHI:2353#AMT1#5518#Fusarium_graminearum#reduced_virulence	85.915	0	643
g12693.t1	I1RW16#PHI:1178__PHI:4941#(Sc_Cdc28)__cdc2A#5518#Fusarium_graminearum#reduced_virulence__lethal__loss_of_pathogenicity	85.897	0	570
g3372.t1	I1RBN6#PHI:1799#GzZC114#5518#Fusarium_graminearum#unaffected_pathogenicity	85.888	0	1436
g9816.t1	I1REJ1#PHI:1662#GzCCHC002#5518#Fusarium_graminearum#unaffected_pathogenicity	85.82	0	875
g3524.t1	I1RWG2#PHI:1242#FGSG_08631#5518#Fusarium_graminearum#unaffected_pathogenicity	85.714	0	712
g4330.t1	I1V1W1#PHI:6207#BbCyp6#176275#Beauveria_bassiana#reduced_virulence	85.642	0	707
g8902.t1	I1RA81#PHI:1198#(Sc_Ssk2/Ssk22)#5518#Fusarium_graminearum#reduced_virulence	85.64	0	2390
g991.t1	Q8TGD1#PHI:254#FOW1#5507#Fusarium_oxysporum#reduced_virulence	85.535	0	516
g538.t1	I1S2L3#PHI:7283#Pg1#5518#Fusarium_graminearum#reduced_virulence__unaffected_pathogenicity	85.515	0	618
g5981.t1	G4N168#PHI:2063__PHI:2110#MCNA__MGG_07456.5#318829#Magnaporthe_oryzae#reduced_virulence__unaffected_pathogenicity	85.439	0	1033
g2354.t1	G4ND54#PHI:8041__PHI:8048#Moubc9__Ubc9#318829#Magnaporthe_oryzae#reduced_virulence	85.417	2.02e-92	275
g557.t1	Q000T6#PHI:1032#Bmp3#40559#Botrytis_cinerea#reduced_virulence	85.412	0	747
g557.t1	Q000T6#PHI:1032#Bmp3#40559#Botrytis_cinerea#reduced_virulence	85.412	0	747
g209.t1	I1RWH5#PHI:1589#GzOB029#5518#Fusarium_graminearum#unaffected_pathogenicity	85.306	3.24e-154	432
g8555.t1	I1RN54#PHI:1214#FGSG_07816#5518#Fusarium_graminearum#reduced_virulence	85.288	0	1492
g1603.t1	I1RC85#PHI:1204#(Sc_Cbk1)#5518#Fusarium_graminearum#reduced_virulence	85.258	0	1091
g532.t1	I1RFM6#PHI:744#ADE5#5518#Fusarium_graminearum#reduced_virulence	85.246	0	1396
g10147.t1	G4N6P6#PHI:8695#MoImd4_(MGG_03699)#318829#Magnaporthe_oryzae#reduced_virulence	85.199	0	926
g1745.t1	I1R9M1#PHI:3834#Fgrho3#5518#Fusarium_graminearum#unaffected_pathogenicity	85.185	1.08e-130	369
g10505.t1	W7MG03#PHI:7141#Fsr1#117187#Fusarium_verticillioides#reduced_virulence	85.181	0	1459
g4951.t1	I1RFX8#PHI:1574#GzOB014#5518#Fusarium_graminearum#lethal	85.138	0	1458
g11134.t1	I1RSI4#PHI:1587#GzOB027#5518#Fusarium_graminearum#unaffected_pathogenicity	85.135	0	1432
g1201.t1	I1RJR9#PHI:3375#FgSte50#5518#Fusarium_graminearum#loss_of_pathogenicity	85.02	0	840
g4222.t1	I1RRB0#PHI:7124#FgEB1#5518#Fusarium_graminearum#reduced_virulence	85.02	1.59e-150	422
g346.t1	I1RAH1#PHI:4658#FgHXK1#5518#Fusarium_graminearum#reduced_virulence	84.969	0	866
g11974.t1	I1RD19#PHI:1251#FGSG_01506#5518#Fusarium_graminearum#unaffected_pathogenicity	84.962	0	964
g3915.t1	I1RZP6#PHI:1197__PHI:3862#(Snf1)__FgSNF1#5518#Fusarium_graminearum#reduced_virulence	84.937	0	1239
g273.t1	I1RWA9#PHI:1647#GzWing019#5518#Fusarium_graminearum#reduced_virulence	84.928	0	2072
g1389.t1	G4MYS1#PHI:4736#MoYpt7#318829#Magnaporthe_oryzae#loss_of_pathogenicity	84.878	4.13e-123	349
g3135.t1	I1RFJ2#PHI:1573#GzOB013#5518#Fusarium_graminearum#lethal	84.76	0	1678
g9334.t1	I1RK32#PHI:1293__PHI:3853#GzAPSES001__FgSWI6#5518#Fusarium_graminearum#reduced_virulence	84.748	0	1380
g8146.t1	J5K8Q8#PHI:3270#ARSEF_2860#176275#Beauveria_bassiana#reduced_virulence	84.722	1.88e-171	478
g6450.t1	I1RB03#PHI:7559#FgGT2#5518#Fusarium_graminearum#loss_of_pathogenicity	84.688	0	937
g8916.t1	G4NCL5#PHI:877#MGG_00383#318829#Magnaporthe_oryzae#reduced_virulence	84.653	0	691
g1426.t1	I1RSE9#PHI:1917#GzZC232#5518#Fusarium_graminearum#reduced_virulence	84.639	0	1187
g8873.t1	G4MPJ3#PHI:8038__PHI:8045#Mosmt3__Smt3#318829#Magnaporthe_oryzae#reduced_virulence	84.615	3.98e-44	141
g7745.t1	I1RX22#PHI:1595#GzOB035#5518#Fusarium_graminearum#unaffected_pathogenicity	84.466	6.96e-58	190
g1609.t1	W7LZA5#PHI:3886#UBL1#117187#Fusarium_verticillioides#reduced_virulence	84.454	0	3726
g4219.t1	Q86ZP4#PHI:304#GzCPS1#5518#Fusarium_graminearum#reduced_virulence	84.359	0	2857
g8912.t1	I1RA89#PHI:1086#FGSG_00416#5518#Fusarium_graminearum#reduced_virulence	84.272	0	852
g11517.t1	I1RC71#PHI:2714#PEX5#5518#Fusarium_graminearum#reduced_virulence	84.227	0	1093
g513.t1	I1RK79#PHI:1577#GzOB017#5518#Fusarium_graminearum#unaffected_pathogenicity	84.138	3.97e-92	266
g8057.t1	G4MQZ2#PHI:2038#Mir1#318829#Magnaporthe_oryzae#unaffected_pathogenicity	84.068	1.98e-173	486
g2218.t1	I1RKK7#PHI:1267#FGSG_04418#5518#Fusarium_graminearum#unaffected_pathogenicity	84.067	0	1305
g7796.t1	I1RZY1#PHI:1602#GzOB043#5518#Fusarium_graminearum#unaffected_pathogenicity	84.028	0	1213
g10191.t1	J4W8U0#PHI:6280#bmiro#176275#Beauveria_bassiana#reduced_virulence	84.026	0	1084
g2308.t1	A0A0D2XWJ8#PHI:4727#gdb1#5507#Fusarium_oxysporum#reduced_virulence__unaffected_pathogenicity	83.935	0	2729
g4026.t1	I1RCC9#PHI:3089__PHI:4174#fac1__Fgac1#5518#Fusarium_graminearum#reduced_virulence__unaffected_pathogenicity	83.908	0	3573
g1614.t1	E9R5E2#PHI:2513#GFA1#746128#Aspergillus_fumigatus#lethal__loss_of_pathogenicity	83.903	0	1213
g6054.t1	Q873Z8#PHI:285__PHI:7242#CHSV__chsV#5507#Fusarium_oxysporum#increased_virulence_(hypervirulence)__loss_of_pathogenicity	83.849	0	3275
g342.t1	I1RAH4#PHI:1562#GzOB002#5518#Fusarium_graminearum#lethal	83.824	0	1746
g6056.t1	I1RE83#PHI:1288__PHI:6300#FGSG_01963__FgPDK1#5518#Fusarium_graminearum#unaffected_pathogenicity__reduced_virulence	83.784	0	673
g2058.t1	I1RXV2#PHI:1758#GzZC073#5518#Fusarium_graminearum#unaffected_pathogenicity	83.777	0	1407
g10483.t1	I1RDG6#PHI:1555#GzMyb019#5518#Fusarium_graminearum#unaffected_pathogenicity	83.725	0	908
g4628.t1	U6ZIB1#PHI:7624#Vfme#1089444#Dickeya_solani#reduced_virulence__unaffected_pathogenicity	83.704	1.07e-144	452
g11141.t1	W7MUV5#PHI:5391#FvSO#117187#Fusarium_verticillioides#loss_of_pathogenicity	83.673	0	2032
g6795.t1	G4N8G2#PHI:8522#MoYPEL1_(MGG_06263.7)#318829#Magnaporthe_oryzae#loss_of_pathogenicity	83.636	1.26e-68	206
g624.t1	I1RZ39#PHI:1599#GzOB039#5518#Fusarium_graminearum#unaffected_pathogenicity	83.607	2.11e-101	292
g5636.t1	I1RY25#PHI:1167#NPC1#5518#Fusarium_graminearum#reduced_virulence	83.582	0	2229
g12195.t1	I1S5M8#PHI:1258#FGSG_12149#5518#Fusarium_graminearum#unaffected_pathogenicity	83.539	9e-148	431
g344.t1	I1RAH2#PHI:1629#GzWing001#5518#Fusarium_graminearum#unaffected_pathogenicity	83.436	0	1353
g7406.t1	G2XJR0#PHI:8670#ACC_deaminase_(VDAG_10392)#27337#Verticillium_dahliae#reduced_virulence__increased_virulence_(hypervirulence)	83.43	0	597
g12504.t1	I1RSR1#PHI:1797#GzZC112#5518#Fusarium_graminearum#unaffected_pathogenicity	83.24	0	1508
g2159.t1	I1RRG0#PHI:1078#Mes1#5518#Fusarium_graminearum#reduced_virulence	83.224	0	1278
g5144.t1	I1RSU2#PHI:724__PHI:730#PKS9__KSA1#5518#Fusarium_graminearum#unaffected_pathogenicity	83.217	0	716
g557.t1	Q8J0E1#PHI:246#CPMK2#5111#Claviceps_purpurea#reduced_virulence	83.215	0	738
g557.t1	Q8J0E1#PHI:246#CPMK2#5111#Claviceps_purpurea#reduced_virulence	83.215	0	738
g4474.t1	I1RZG7#PHI:1551#GzMyb015#5518#Fusarium_graminearum#unaffected_pathogenicity	83.205	0	1306
g349.t1	Q4WX65#PHI:2540#IPP1#746128#Aspergillus_fumigatus#lethal	83.158	0	508
g10595.t1	I1RJM9#PHI:1221#FGSG_04054#5518#Fusarium_graminearum#lethal	83.137	0	808
g626.t1	I1RZ37#PHI:1237#FGSG_09660#5518#Fusarium_graminearum#lethal	83.036	0	1860
g11109.t1	Q4I6S5#PHI:6898#FgMon1#5518#Fusarium_graminearum#reduced_virulence	82.968	0	999
g6099.t1	I1RE46#PHI:1570#GzOB010#5518#Fusarium_graminearum#unaffected_pathogenicity	82.941	0	1492
g6104.t1	I1RJT8#PHI:8909#FgVPS22_(FGSG_04120)#5518#Fusarium_graminearum#reduced_virulence	82.895	4.81e-40	134
g1800.t1	I1REC4#PHI:6095#FgVps5#5518#Fusarium_graminearum#reduced_virulence	82.852	0	947
g681.t1	I1RPA0#PHI:1375#GzC2H038#5518#Fusarium_graminearum#unaffected_pathogenicity	82.84	0	853
g4863.t1	I1RWP1#PHI:1648__PHI:6246#GzWing020__Famyo2#5518#Fusarium_graminearum#reduced_virulence	82.833	0	3994
g12408.t1	I1RMV6#PHI:1222#FGSG_05306#5518#Fusarium_graminearum#lethal	82.754	0	2631
g6384.t1	I1RS41#PHI:1529#Gzscp#5518#Fusarium_graminearum#reduced_virulence	82.705	0	1967
g7979.t1	I1RR41#PHI:6186#FgCHS8#5518#Fusarium_graminearum#reduced_virulence	82.663	0	1082
g6815.t1	I1RZN4#PHI:1753#GzZC068#5518#Fusarium_graminearum#unaffected_pathogenicity	82.66	0	1307
g12553.t1	I1RC07#PHI:1348#GzC2H008#5518#Fusarium_graminearum#reduced_virulence	82.658	0	1325
g11864.t1	G4N8I6#PHI:7133#MoRab5A#318829#Magnaporthe_oryzae#reduced_virulence	82.5	2.8e-112	330
g9279.t1	I1R9W2#PHI:1561#GzOB001#5518#Fusarium_graminearum#unaffected_pathogenicity	82.474	1.29e-160	452
g10821.t1	J5K938#PHI:7057#PilA#176275#Beauveria_bassiana#reduced_virulence	82.353	0	543
g3902.t1	Q4HYC1#PHI:1201#(Bud32)#5518#Fusarium_graminearum#reduced_virulence	82.353	1.61e-154	434
g12664.t1	J4VXB0#PHI:7150#eca1#176275#Beauveria_bassiana#reduced_virulence	82.347	0	1640
g2843.t1	I1S042#PHI:1090__PHI:1163__PHI:3893#FGSG_10057__ERB1__FgEBR1#5518#Fusarium_graminearum#reduced_virulence	82.336	0	1622
g557.t1	D3J127#PHI:2318#AaSLT2#5599#Alternaria_alternata#reduced_virulence	82.326	0	704
g557.t1	D3J127#PHI:2318#AaSLT2#5599#Alternaria_alternata#reduced_virulence	82.326	0	704
g2119.t1	Q870A3#PHI:315__PHI:7241#PacC__pacC#5507#Fusarium_oxysporum#reduced_virulence__increased_virulence_(hypervirulence)	82.305	0	966
g2033.t1	I1RXX1#PHI:1006#HMR1#5518#Fusarium_graminearum#reduced_virulence	82.23	0	2015
g8260.t1	I1RBX1#PHI:5779#Fgsg01064#5518#Fusarium_graminearum#unaffected_pathogenicity	82.129	0	834
g11007.t1	I1RD63#PHI:6093#FgVps29#5518#Fusarium_graminearum#reduced_virulence	82.09	3.77e-117	333
g7318.t1	G4MXS1#PHI:8611#pyruvate_kinase#318829#Magnaporthe_oryzae#unaffected_pathogenicity__reduced_virulence__loss_of_pathogenicity	82.061	0	907
g1756.t1	I1RYF8#PHI:1236#FGSG_09408#5518#Fusarium_graminearum#lethal	81.944	0	1201
g557.t1	Q1G7H6#PHI:1042#MgSlt2#1047171#Zymoseptoria_tritici#reduced_virulence	81.925	0	691
g557.t1	Q1G7H6#PHI:1042#MgSlt2#1047171#Zymoseptoria_tritici#reduced_virulence	81.925	0	691
g2409.t1	I1RDI9#PHI:1634#GzWing006#5518#Fusarium_graminearum#unaffected_pathogenicity	81.89	1.33e-75	223
g5084.t1	I1RKC4#PHI:1169__PHI:1172#HDF2#5518#Fusarium_graminearum#reduced_virulence	81.881	0	1274
g4758.t1	I1RB84#PHI:1263#FGSG_00792#5518#Fusarium_graminearum#unaffected_pathogenicity	81.848	0	1060
g8543.t1	I1RN43#PHI:1268#FGSG_05406#5518#Fusarium_graminearum#unaffected_pathogenicity	81.838	0	761
g6530.t1	I1RB79#PHI:1249#FGSG_00786#5518#Fusarium_graminearum#unaffected_pathogenicity	81.818	0	924
g1561.t1	I1S0Q0#PHI:1670#GzCCHC010#5518#Fusarium_graminearum#unaffected_pathogenicity	81.818	1.11e-94	276
g181.t1	Q4X132#PHI:2548#KRR1#746128#Aspergillus_fumigatus#lethal	81.699	0	528
g3155.t1	I1RX47#PHI:1666#GzCCHC006#5518#Fusarium_graminearum#unaffected_pathogenicity	81.678	0	758
g12404.t1	Q0WXM3#PHI:734#FOW2#5507#Fusarium_oxysporum#loss_of_pathogenicity	81.606	0	1092
g10122.t1	G4MTG9#PHI:8734#MoLeu1_(MGG_01553)#318829#Magnaporthe_oryzae#loss_of_pathogenicity	81.562	0	1278
g8502.t1	I1RY42#PHI:1207__PHI:3178#(Sc_Kin1/Kin2)__FgKin1#5518#Fusarium_graminearum#reduced_virulence	81.542	0	1457
g557.t1	M3AFB7#PHI:8002#Slt2#1873960#Pseudocercospora_fijiensis#reduced_virulence	81.517	0	697
g557.t1	M3AFB7#PHI:8002#Slt2#1873960#Pseudocercospora_fijiensis#reduced_virulence	81.517	0	697
g10100.t1	I1RZ11#PHI:1411#GzC2H078#5518#Fusarium_graminearum#lethal	81.513	4.1e-116	335
g8654.t1	I1RTD1#PHI:1645#GzWing017#5518#Fusarium_graminearum#unaffected_pathogenicity	81.486	0	1407
g6827.t1	G4MRB4#PHI:4491#SHM#318829#Magnaporthe_oryzae#reduced_virulence	81.467	0	853
g12274.t1	W7LS89#PHI:6262#FUG1#117187#Fusarium_verticillioides#reduced_virulence	81.456	0	839
g557.t1	A3QYW5#PHI:2367#Mps1#5016#Bipolaris_maydis#reduced_virulence	81.429	0	674
g557.t1	A3QYW5#PHI:2367#Mps1#5016#Bipolaris_maydis#reduced_virulence	81.429	0	674
g2828.t1	I1S053#PHI:1772#GzZC087#5518#Fusarium_graminearum#reduced_virulence	81.402	0	1049
g4007.t1	Q2V086#PHI:862#ClaSSD1#5462#Colletotrichum_lagenaria#loss_of_pathogenicity	81.381	0	1553
g12685.t1	I1RCJ5#PHI:1212#(Sc_Rim15)#5518#Fusarium_graminearum#reduced_virulence	81.366	0	3065
g1344.t1	I1RPM7#PHI:1376#GzC2H039#5518#Fusarium_graminearum#unaffected_pathogenicity	81.356	0	801
g670.t1	I1RXF3#PHI:1511#GzHOME009#5518#Fusarium_graminearum#reduced_virulence	81.35	0	972
g630.t1	I1RZ35#PHI:1598#GzOB038#5518#Fusarium_graminearum#reduced_virulence	81.343	1.34e-76	226
g3910.t1	I1RZP2#PHI:1667#GzCCHC007#5518#Fusarium_graminearum#unaffected_pathogenicity	81.342	0	766
g6084.t1	A6N6J8#PHI:1021__PHI:2981#CTF1__Ctf1#5507#Fusarium_oxysporum#unaffected_pathogenicity__reduced_virulence	81.316	0	1538
g11475.t1	I1RM35#PHI:1580#GzOB020#5518#Fusarium_graminearum#unaffected_pathogenicity	81.282	0	571
g10318.t1	G4NH84#PHI:8588#Moppe1#318829#Magnaporthe_oryzae#reduced_virulence	81.235	0	691
g6801.t1	I1RN27#PHI:1638#GzWing010#5518#Fusarium_graminearum#unaffected_pathogenicity	81.219	0	956
g9897.t1	I1S0C0#PHI:1335__PHI:3110__PHI:3808__PHI:4244#GzbZIP017__FgATF1__Atf1__FgOS-2#5518#Fusarium_graminearum#reduced_virulence__increased_virulence_(hypervirulence)	81.203	0	802
g376.t1	I1RAE2#PHI:1241#FGSG_00469#5518#Fusarium_graminearum#unaffected_pathogenicity	81.202	0	852
g7513.t1	J5JJ15#PHI:7154#spf1#176275#Beauveria_bassiana#reduced_virulence	81.108	0	2222
g8316.t1	I1RNS1#PHI:355#GzmetE#5518#Fusarium_graminearum#reduced_virulence	81.102	0	842
g6470.t1	I1RB16#PHI:1967#GzZC282#5518#Fusarium_graminearum#reduced_virulence	81.099	0	1253
g5765.t1	U6ZIB1#PHI:7624#Vfme#1089444#Dickeya_solani#reduced_virulence__unaffected_pathogenicity	81.089	0	580
g10556.t1	I1RR00#PHI:1228#FGSG_06502#5518#Fusarium_graminearum#lethal	81.081	0	886
g3553.t1	E9EQM1#PHI:3817#mrGAT#568076#Metarhizium_robertsii#reduced_virulence	81.016	0	1206
g4189.t1	I1RIP4#PHI:3038#FgERG5B#5518#Fusarium_graminearum#reduced_virulence	81	0	849
g4784.t1	I1RT48#PHI:1216#FGSG_07344#5518#Fusarium_graminearum#reduced_virulence	80.96	0	1077
g7784.t1	I1RUG2#PHI:1233#FGSG_07855#5518#Fusarium_graminearum#lethal	80.873	0	756
g348.t1	J5JBK6#PHI:7058#PilB#176275#Beauveria_bassiana#reduced_virulence	80.859	8.71e-153	435
g7424.t1	I1RWF1#PHI:1403#GzC2H066#5518#Fusarium_graminearum#reduced_virulence	80.815	0	608
g11206.t1	I1RUM5#PHI:1807#GzZC122#5518#Fusarium_graminearum#lethal	80.79	0	1196
g12812.t1	I1RYN7#PHI:1299#GzAT003#5518#Fusarium_graminearum#unaffected_pathogenicity	80.741	0	1557
g369.t1	I1RAF0#PHI:1343#GzC2H003#5518#Fusarium_graminearum#reduced_virulence	80.726	0	572
g9685.t1	H9C592#PHI:2590__PHI:2611#CMLE#5507#Fusarium_oxysporum#loss_of_pathogenicity	80.72	0	641
g278.t1	I1RWQ0#PHI:1240__PHI:3088#FGSG_08729__CPK2#5518#Fusarium_graminearum#unaffected_pathogenicity__loss_of_pathogenicity	80.702	0	669
g3119.t1	Q5YCX0#PHI:336#CHS2#5507#Fusarium_oxysporum#reduced_virulence	80.7	0	1712
g6582.t1	I1RT82#PHI:1287#FGSG_07381#5518#Fusarium_graminearum#unaffected_pathogenicity	80.694	0	764
g11776.t1	I1S0G8#PHI:1247#FGSG_10196#5518#Fusarium_graminearum#unaffected_pathogenicity	80.683	0	1249
g6459.t1	I1RB11#PHI:1443#GzGATA001#5518#Fusarium_graminearum#unaffected_pathogenicity	80.617	0	728
g4345.t1	I1RX04#PHI:1406#GzC2H070#5518#Fusarium_graminearum#lethal	80.469	0	953
g3475.t1	I1RZD4#PHI:1413#GzC2H080#5518#Fusarium_graminearum#unaffected_pathogenicity	80.437	0	1622
g4886.t1	Q5J4D6#PHI:365__PHI:2267#MLS1__Mls1#13684#Parastagonospora_nodorum#loss_of_pathogenicity	80.407	0	918
g7974.t1	Q4I8B6#PHI:1675#GzDHHC003#5518#Fusarium_graminearum#unaffected_pathogenicity	80.387	0	1258
g6146.t1	G4N8Y3#PHI:3213#MoCDIP1#318829#Magnaporthe_oryzae#effector_(plant_avirulence_determinant)	80.282	0	549
g3344.t1	I1S074#PHI:8915#FgVPS32_(FGSG_10092)#5518#Fusarium_graminearum#lethal	80.269	1.36e-117	345
g557.t1	K9FXQ2#PHI:8737#Slt2_(PDIG_73290)#36651#Penicillium_digitatum#reduced_virulence	80.182	0	698
g2263.t1	I1S5Z3#PHI:1685#GzRad003#5518#Fusarium_graminearum#unaffected_pathogenicity	80.18	0	890
g7572.t1	I1RZK5#PHI:1600#GzOB041#5518#Fusarium_graminearum#unaffected_pathogenicity	80.128	4.2e-81	239
g8927.t1	G2WYZ0#PHI:7329#STT3#27337#Verticillium_dahliae#reduced_virulence	80.08	0	1232
g1212.t1	I1RJS7#PHI:1902#GzZC217#5518#Fusarium_graminearum#unaffected_pathogenicity	80.059	0	1625
g492.t1	Q4IEV4#PHI:1637#GzWing009#5518#Fusarium_graminearum#lethal	79.962	0	864
g8574.t1	P0CT09#PHI:7223#Moend3#318829#Magnaporthe_oryzae#reduced_virulence	79.899	0	665
g11748.t1	J4WFU2#PHI:4107#BbMBF1#176275#Beauveria_bassiana#reduced_virulence	79.87	3.71e-86	252
g10996.t1	I1RJU1#PHI:6573#FgNoxR#5518#Fusarium_graminearum#reduced_virulence	79.846	0	823
g7187.t1	I1S2F2#PHI:1500#GzHMG032#5518#Fusarium_graminearum#unaffected_pathogenicity	79.811	0	2340
g5099.t1	A0A098DK45#PHI:7123#Fgvps39#5518#Fusarium_graminearum#reduced_virulence	79.81	0	1338
g3868.t1	G4MQ14#PHI:7319#CON6#318829#Magnaporthe_oryzae#unaffected_pathogenicity	79.762	1.54e-39	127
g8136.t1	G4MW66#PHI:2062__PHI:3815#Gph1__GPH1#318829#Magnaporthe_oryzae#unaffected_pathogenicity__loss_of_pathogenicity__reduced_virulence	79.684	0	1491
g10717.t1	I1S0Z2#PHI:1296#GzAPSES004#5518#Fusarium_graminearum#reduced_virulence	79.664	0	1078
g3651.t1	P32964#PHI:143#CHT#5563#Gloeocercospora_sorghi#unaffected_pathogenicity	79.656	0	587
g11055.t1	I1R9N5#PHI:3910#FgSAT#5518#Fusarium_graminearum#unaffected_pathogenicity	79.655	0	826
g6300.t1	I1RRM0#PHI:1891#GzZC206#5518#Fusarium_graminearum#unaffected_pathogenicity	79.619	0	1123
g4671.t1	I1RE06#PHI:1356#GzC2H016#5518#Fusarium_graminearum#unaffected_pathogenicity	79.61	0	741
g3313.t1	I1S0A1#PHI:1603#GzOB044#5518#Fusarium_graminearum#unaffected_pathogenicity	79.596	0	919
g5120.t1	I1RKF3#PHI:2418__PHI:2419#CID1#5518#Fusarium_graminearum#reduced_virulence	79.567	0	508
g1208.t1	I1RJS3#PHI:1162#BDM1#5518#Fusarium_graminearum#reduced_virulence__unaffected_pathogenicity	79.522	7.8e-167	468
g12192.t1	G4MUR7#PHI:4475#MoTup1#318829#Magnaporthe_oryzae#loss_of_pathogenicity	79.518	0	659
g8148.t1	Q4I7F9#PHI:1458#GzAra006#5518#Fusarium_graminearum#unaffected_pathogenicity	79.48	0	1123
g331.t1	I1RAI5#PHI:1319#GzbZIP001#5518#Fusarium_graminearum#reduced_virulence	79.475	0	977
g10720.t1	I1S0Y9#PHI:1186#(Sc_Cdc15)#5518#Fusarium_graminearum#reduced_virulence	79.432	0	2174
g9206.t1	I1RM32#PHI:9048#FgSpo7_(FGSG_05009)#5518#Fusarium_graminearum#reduced_virulence	79.404	0	622
g2107.t1	I1S7Z8#PHI:1432#GzC2H100#5518#Fusarium_graminearum#unaffected_pathogenicity	79.396	0	560
g10134.t1	I1RYY6#PHI:6094#FgVps17#5518#Fusarium_graminearum#reduced_virulence	79.35	0	922
g6369.t1	U6ZIB1#PHI:7624#Vfme#1089444#Dickeya_solani#reduced_virulence__unaffected_pathogenicity	79.345	0	645
g3611.t1	I1RNI6#PHI:1309#GzbHLH010#5518#Fusarium_graminearum#lethal	79.288	8.33e-167	469
g8120.t1	E3QJK7#PHI:6827#GPI8#31870#Colletotrichum_graminicola#loss_of_pathogenicity	79.135	0	632
g9109.t1	I1RU98#PHI:6126__PHI:5751#FGSG_07783__ScOrtholog_DIA3#5518#Fusarium_graminearum#unaffected_pathogenicity__reduced_virulence	79.039	0	775
g3914.t1	P0CT06#PHI:305#ICL1#318829#Magnaporthe_oryzae#reduced_virulence	78.975	0	920
g8752.t1	I1RJQ3#PHI:1364#GzC2H024#5518#Fusarium_graminearum#reduced_virulence	78.914	0	980
g8177.t1	I1S828#PHI:1503#GzHMG035#5518#Fusarium_graminearum#unaffected_pathogenicity	78.879	0	1138
g12028.t1	I1SAP7#PHI:1624#GzJUM006#5518#Fusarium_graminearum#unaffected_pathogenicity	78.878	0	986
g12135.t1	I1S282#PHI:1452#GzHSF003#5518#Fusarium_graminearum#unaffected_pathogenicity	78.849	0	876
g729.t1	G4MNG8#PHI:807#MGG_06951#318829#Magnaporthe_oryzae#reduced_virulence	78.834	0	749
g7247.t1	G4N3J5#PHI:5306#MoSKP1#318829#Magnaporthe_oryzae#loss_of_pathogenicity	78.824	2.08e-93	271
g8877.t1	I1RCK0#PHI:1920#GzZC235#5518#Fusarium_graminearum#unaffected_pathogenicity	78.77	0	1315
g3960.t1	I1RRR9#PHI:1457#GzAra005#5518#Fusarium_graminearum#unaffected_pathogenicity	78.75	0	894
g12856.t1	I1RGF4#PHI:1306#GzbHLH007#5518#Fusarium_graminearum#unaffected_pathogenicity	78.75	1.14e-166	469
g7229.t1	I1RS32#PHI:1180#(Sc_Sat4)#5518#Fusarium_graminearum#reduced_virulence	78.736	0	827
g3598.t1	I1RNH4#PHI:5028#gta1#5518#Fusarium_graminearum#unaffected_pathogenicity__reduced_virulence	78.728	0	836
g7025.t1	I1RE94#PHI:1572#GzOB012#5518#Fusarium_graminearum#unaffected_pathogenicity	78.69	0	1399
g10106.t1	G4MZY1#PHI:2034#MFP1#318829#Magnaporthe_oryzae#reduced_virulence	78.659	0	1442
g6895.t1	I1RQE9#PHI:1317#GzBrom002#5518#Fusarium_graminearum#reduced_virulence	78.64	0	1707
g8875.t1	G4N7U4#PHI:6634#MoDnm1#318829#Magnaporthe_oryzae#reduced_virulence	78.624	0	1241
g12858.t1	J5K093#PHI:3096#Ktr4#176275#Beauveria_bassiana#reduced_virulence	78.589	0	666
g11655.t1	C6ZRH8#PHI:2976#CgOPT1#474922#Colletotrichum_gloeosporioides#reduced_virulence	78.542	0	1203
g2901.t1	Q4IR08#PHI:1608#GzP53L001#5518#Fusarium_graminearum#unaffected_pathogenicity	78.521	1.38e-140	400
g6432.t1	G4MWX1#PHI:7134#MoRab5B#318829#Magnaporthe_oryzae#reduced_virulence	78.512	2.03e-130	370
g12191.t1	I1RFM2#PHI:3035#FgERG3A#5518#Fusarium_graminearum#reduced_virulence	78.51	0	568
g5321.t1	G4MXC5#PHI:5190#MoPRX1#318829#Magnaporthe_oryzae#reduced_virulence	78.44	5.53e-128	363
g9803.t1	I1S1X8#PHI:2355#AMT4#5518#Fusarium_graminearum#reduced_virulence	78.434	0	1246
g6107.t1	H6ULV1#PHI:5450#gdh2#474922#Colletotrichum_gloeosporioides#reduced_virulence__unaffected_pathogenicity	78.418	0	1709
g10919.t1	J5JFS1#PHI:9046#BbATG7_(BBA_08545)#176275#Beauveria_bassiana#reduced_virulence	78.417	0	1120
g9389.t1	U6ZIB1#PHI:7624#Vfme#1089444#Dickeya_solani#reduced_virulence__unaffected_pathogenicity	78.414	0	1423
g3025.t1	I1S245#PHI:1659#GzCCCH003#5518#Fusarium_graminearum#unaffected_pathogenicity	78.363	1.15e-180	508
g2168.t1	J9MHC1#PHI:1103__PHI:2282#FOXG_02277__MeaB#5507#Fusarium_oxysporum#unaffected_pathogenicity__increased_virulence_(hypervirulence)	78.333	0	535
g3442.t1	Q4WGR1#PHI:2541#OLE1#746128#Aspergillus_fumigatus#lethal	78.281	0	741
g1420.t1	I1RSE4#PHI:1096#FGSG_07062#5518#Fusarium_graminearum#unaffected_pathogenicity	78.272	0	676
g6905.t1	G4NC97#PHI:3976#MoIlv6#318829#Magnaporthe_oryzae#loss_of_pathogenicity	78.233	5.23e-169	475
g3913.t1	O42622#PHI:123__PHI:775__PHI:794__PHI:7227#PTH9_(NTH1)__MGG_09471__nth1#318829#Magnaporthe_oryzae#reduced_virulence	78.231	0	1216
g3584.t1	E9ETZ6#PHI:7251#Mrtdc#568076#Metarhizium_robertsii#reduced_virulence	78.215	0	1239
g3924.t1	I1RZQ6#PHI:7267#PKR#5518#Fusarium_graminearum#reduced_virulence	78.195	0	618
g6124.t1	I1RME6#PHI:1274#FGSG_05135#5518#Fusarium_graminearum#unaffected_pathogenicity	78.191	0	2576
g10084.t1	S5FRT9#PHI:3828#AbaA#5518#Fusarium_graminearum#unaffected_pathogenicity	78.09	0	1410
g8750.t1	G4MMK2#PHI:3975#MoIlv2#318829#Magnaporthe_oryzae#loss_of_pathogenicity	78.084	0	1093
g11983.t1	I1RBZ7#PHI:1316#GzBrom001#5518#Fusarium_graminearum#unaffected_pathogenicity	78.059	1.9e-132	375
g573.t1	Q8TFN6#PHI:1054#CgCHSI#31870#Colletotrichum_graminicola#unaffected_pathogenicity	78.049	0	1464
g4821.t1	G8AA67#PHI:2476#CcpelA#27358#Colletotrichum_coccodes#reduced_virulence__increased_virulence_(hypervirulence)	78.041	5.37e-166	468
g11103.t1	I1RSG1#PHI:1916#GzZC231#5518#Fusarium_graminearum#unaffected_pathogenicity	78.018	0	873
g8180.t1	I1RRX7#PHI:1183#(Sc_Cmk1/Cmk2)#5518#Fusarium_graminearum#reduced_virulence	78.005	0	614
g11302.t1	I1RG87#PHI:1358#GzC2H018#5518#Fusarium_graminearum#unaffected_pathogenicity	77.991	0	1750
g3269.t1	G4MVC4#PHI:5082#MoAcat1#318829#Magnaporthe_oryzae#reduced_virulence	77.99	0	681
g546.t1	I1S0R5#PHI:5765__PHI:9049#ScOrtholog_NEM1__FgNem1_(FGSG_10302)#5518#Fusarium_graminearum#reduced_virulence	77.912	0	739
g2584.t1	I1SA65#PHI:1440__PHI:5574#GzNot002__FgNOT3#5518#Fusarium_graminearum#reduced_virulence	77.833	0	828
g3462.t1	A0A0E0SEE4#PHI:6259#DOHH#5518#Fusarium_graminearum#reduced_virulence__unaffected_pathogenicity	77.745	0	534
g9335.t1	I1RK33#PHI:1683#GzRad001#5518#Fusarium_graminearum#lethal	77.745	0	1017
g3735.t1	I1RAP1#PHI:1988#GzZC303#5518#Fusarium_graminearum#unaffected_pathogenicity	77.744	0	1079
g8650.t1	J4W023#PHI:7181#cypB#176275#Beauveria_bassiana#reduced_virulence	77.723	1.57e-113	327
g1217.t1	G4N178#PHI:2153__PHI:2356#MoHyr1__MoHYR1#318829#Magnaporthe_oryzae#reduced_virulence	77.711	1.39e-98	285
g5756.t1	I1RMD1#PHI:1958#GzZC273#5518#Fusarium_graminearum#unaffected_pathogenicity	77.64	0	1522
g3590.t1	I1RNG8#PHI:1176#(Sc_Atg1)#5518#Fusarium_graminearum#reduced_virulence	77.62	0	1422
g9545.t1	I1RA39#PHI:1205#(Sc_CDC15)#5518#Fusarium_graminearum#reduced_virulence	77.607	0	1268
g1647.t1	G4MR53#PHI:7188#MoCAPB#318829#Magnaporthe_oryzae#reduced_virulence	77.544	4.12e-154	435
g11331.t1	I1RXT3#PHI:7672#FgLetm1#5518#Fusarium_graminearum#reduced_virulence	77.5	0	818
g11968.t1	G4N9W2#PHI:6607#ARRDC1#318829#Magnaporthe_oryzae#reduced_virulence	77.5	0	662
g10600.t1	A0A0E0S648#PHI:5780#Fgsg04051#5518#Fusarium_graminearum#unaffected_pathogenicity	77.451	6.84e-180	503
g9492.t1	W7LT88#PHI:2463#RGSC1#117187#Fusarium_verticillioides#unaffected_pathogenicity	77.441	0	1828
g4421.t1	I1S2I6#PHI:1826#GzZC141#5518#Fusarium_graminearum#unaffected_pathogenicity	77.427	0	711
g179.t1	I1RQ67#PHI:1255#FGSG_06206#5518#Fusarium_graminearum#unaffected_pathogenicity	77.424	0	1146
g7839.t1	I1RX74#PHI:1771#GzZC086#5518#Fusarium_graminearum#unaffected_pathogenicity	77.406	0	596
g7220.t1	I1S2I3#PHI:1695#GzZC010#5518#Fusarium_graminearum#unaffected_pathogenicity	77.397	0	891
g3939.t1	I1RZR8#PHI:1752#GzZC067#5518#Fusarium_graminearum#unaffected_pathogenicity	77.348	0	1412
g8540.t1	I1ZIP0#PHI:6208#BbCyp8#176275#Beauveria_bassiana#unaffected_pathogenicity	77.32	0	917
g12284.t1	I1RMW3#PHI:6408__PHI:6603#FgCdc3__FaCdc3_(FGSG_05315.3)#5518__282267#Fusarium_graminearum__Fusarium_asiaticum#reduced_virulence	77.311	0	882
g12227.t1	I1RFW6#PHI:1463#GzCCAAT003#5518#Fusarium_graminearum#unaffected_pathogenicity	77.305	1.5e-147	418
g10916.t1	I1S0J9#PHI:1185#(Sc_Swe1)#5518#Fusarium_graminearum#reduced_virulence	77.273	0	775
g4232.t1	I1RU06#PHI:6124__PHI:5750#FGSG_07678__ScOrtholog_GIC1#5518#Fusarium_graminearum#reduced_virulence	77.23	0	655
g6362.t1	I1RS54#PHI:1518#GzHOMEL016#5518#Fusarium_graminearum#unaffected_pathogenicity	77.215	9.47e-87	262
g11898.t1	W7MGE8#PHI:8037#Fvlds1#117187#Fusarium_verticillioides#reduced_virulence	77.198	0	1902
g6523.t1	W7LLK3#PHI:7143#FvCYP1#117187#Fusarium_verticillioides#reduced_virulence	77.193	7.17e-127	361
g4869.t1	Q5A5Q8#PHI:6076#RPS41#5476#Candida_albicans#reduced_virulence	77.132	4.48e-150	422
g1309.t1	X0I5S4#PHI:6530#gas1#5507#Fusarium_oxysporum#reduced_virulence	77.113	0	802
g10068.t1	I1RSV8#PHI:1519#GzHOMEL018#5518#Fusarium_graminearum#unaffected_pathogenicity	77.076	0	781
g11891.t1	I1RCI0#PHI:1454#GzAra002#5518#Fusarium_graminearum#unaffected_pathogenicity	77.01	0	967
g8154.t1	I1RRW0#PHI:8743#FgPEX4_(FGSG_06857)#5518#Fusarium_graminearum#reduced_virulence	76.97	6.01e-94	275
g10444.t1	G4MRH1#PHI:7112#MoERR1#318829#Magnaporthe_oryzae#reduced_virulence	76.959	1.57e-122	349
g8223.t1	I1RBU0#PHI:1632#GzWing004#5518#Fusarium_graminearum#unaffected_pathogenicity	76.936	0	934
g6982.t1	I1RMG9#PHI:1011#FET3#5518#Fusarium_graminearum#unaffected_pathogenicity	76.935	0	1004
g32.t1	I1S5L3#PHI:1728#GzZC043#5518#Fusarium_graminearum#unaffected_pathogenicity	76.923	9.98e-32	111
g4399.t1	G4NB53#PHI:5472#MoDeam#318829#Magnaporthe_oryzae#reduced_virulence	76.836	0	562
g3516.t1	U6ZIB1#PHI:7624#Vfme#1089444#Dickeya_solani#reduced_virulence__unaffected_pathogenicity	76.829	0	989
g5313.t1	I1RTN5#PHI:1549__PHI:2385#MYT2#5518#Fusarium_graminearum#unaffected_pathogenicity__reduced_virulence	76.812	3.83e-103	303
g11011.t1	I1RD66#PHI:444__PHI:1292__PHI:1320#ZIF1#5518#Fusarium_graminearum#reduced_virulence	76.801	0	750
g43.t1	I1RP15#PHI:1252#FGSG_05764#5518#Fusarium_graminearum#unaffected_pathogenicity	76.794	0	1155
g5863.t1	I1RC15#PHI:1633#GzWing005#5518#Fusarium_graminearum#unaffected_pathogenicity	76.786	0	539
g5100.t1	A0A098DK45#PHI:7123#Fgvps39#5518#Fusarium_graminearum#reduced_virulence	76.744	0	1554
g8021.t1	I1RSL0#PHI:1915#GzZC230#5518#Fusarium_graminearum#reduced_virulence	76.708	0	929
g4512.t1	J5K1X2#PHI:7036#Pmt4#176275#Beauveria_bassiana#increased_virulence_(hypervirulence)__reduced_virulence	76.684	0	1236
g9529.t1	Q58Z64#PHI:423#VAD1#5207#Cryptococcus_neoformans#reduced_virulence	76.675	0	656
g4735.t1	I1RBA2#PHI:1842#GzZC157#5518#Fusarium_graminearum#unaffected_pathogenicity	76.553	0	1015
g12346.t1	I1RZZ3#PHI:2728#FgERG4#5518#Fusarium_graminearum#reduced_virulence	76.529	0	915
g1398.t1	I1RA31#PHI:1461#GzCCAAT001#5518#Fusarium_graminearum#unaffected_pathogenicity	76.508	2.25e-148	422
g9645.t1	I1RMR8#PHI:1516#GzHOMEL012#5518#Fusarium_graminearum#lethal	76.485	0	553
g5840.t1	I1RC35#PHI:1219#FGSG_01137#5518#Fusarium_graminearum#lethal	76.477	0	1298
g4223.t1	A0A0D2XEI7#PHI:9050#FolVam7_(FOXG_02319)#5507#Fusarium_oxysporum#reduced_virulence	76.454	0	542
g9230.t1	G4N745#PHI:5083#MoAcat2#318829#Magnaporthe_oryzae#reduced_virulence	76.441	0	597
g2838.t1	I1S047#PHI:7673#FgLetm2#5518#Fusarium_graminearum#unaffected_pathogenicity__reduced_virulence	76.437	0	550
g6096.t1	A7F6V9#PHI:2911#Ss-pth2#5180#Sclerotinia_sclerotiorum#reduced_virulence	76.393	0	1000
g12282.t1	E9EMQ0#PHI:3328#MrKu70#568076#Metarhizium_robertsii#unaffected_pathogenicity	76.316	0	1015
g3339.t1	I1S077#PHI:1210#FGSG_10095#5518#Fusarium_graminearum#reduced_virulence	76.222	0	2007
g10841.t1	I1RQL1#PHI:1451#GzGH#5518#Fusarium_graminearum#unaffected_pathogenicity	76.22	0	1206
g10244.t1	U6ZIB1#PHI:7624#Vfme#1089444#Dickeya_solani#reduced_virulence__unaffected_pathogenicity	76.216	0	605
g7019.t1	I1RCF7#PHI:1220#FGSG_01271#5518#Fusarium_graminearum#lethal	76.205	0	1502
g3169.t1	I1RW22#PHI:1439#GzNot001#5518#Fusarium_graminearum#lethal	76.183	0	3077
g6058.t1	I1RE80#PHI:3037#FgERG5A#5518#Fusarium_graminearum#reduced_virulence	76.071	0	918
g9597.t1	I1RST1#PHI:1491#GzHMG023#5518#Fusarium_graminearum#lethal	76.04	0	1164
g10037.t1	I1RWL6#PHI:1190#(Sc_Pbs2)#5518#Fusarium_graminearum#reduced_virulence	75.94	0	1010
g12014.t1	N4V0R3#PHI:3278#CoIra1#5465#Colletotrichum_orbiculare#reduced_virulence	75.937	0	2162
g3466.t1	I1S9V9#PHI:1655#GzWing028#5518#Fusarium_graminearum#unaffected_pathogenicity	75.922	0	2837
g11646.t1	I6PDX4#PHI:7596#MakatG1#92637#Metarhizium_acridum#reduced_virulence__unaffected_pathogenicity	75.908	0	1162
g9644.t1	I1RMR7#PHI:8911#FgVPS36_(FGSG_05263)#5518#Fusarium_graminearum#reduced_virulence	75.878	0	976
g733.t1	I1RPD3#PHI:6719#FgPLC1#5518#Fusarium_graminearum#reduced_virulence	75.875	0	1660
g3288.t1	I1RQ34#PHI:1377#GzC2H040#5518#Fusarium_graminearum#unaffected_pathogenicity	75.866	0	1422
g3055.t1	I1S231#PHI:1785#GzZC100#5518#Fusarium_graminearum#unaffected_pathogenicity	75.835	0	815
g3934.t1	I1RZR4#PHI:8924#FgPLD1_(FGSG_09917)#5518#Fusarium_graminearum#reduced_virulence	75.828	0	2713
g12090.t1	G4MU34#PHI:3257#MoIlv1#318829#Magnaporthe_oryzae#reduced_virulence	75.812	0	863
g12146.t1	B0XTA5#PHI:2293#cycA#746128#Aspergillus_fumigatus#reduced_virulence	75.789	9.66e-49	156
g10924.t1	I1S0J3#PHI:1526#GzHOMEL036#5518#Fusarium_graminearum#unaffected_pathogenicity	75.772	0	1553
g4110.t1	A0A0C4DHY4#PHI:4880#pgx6#5507#Fusarium_oxysporum#unaffected_pathogenicity__reduced_virulence	75.758	0	764
g9233.t1	I1RYF6#PHI:1597#GzOB037#5518#Fusarium_graminearum#unaffected_pathogenicity	75.734	0	2349
g9372.t1	F8U971#PHI:6157#bcdh#40559#Botrytis_cinerea#unaffected_pathogenicity	75.718	0	637
g7259.t1	I1S216#PHI:1605#GzOB046#5518#Fusarium_graminearum#unaffected_pathogenicity	75.714	0	879
g625.t1	G4NFW7#PHI:8928#MoSCAD2_(MGG_08690)#318829#Magnaporthe_oryzae#loss_of_pathogenicity	75.682	0	681
g2463.t1	G4MQA4#PHI:5647#FZC50#318829#Magnaporthe_oryzae#unaffected_pathogenicity	75.676	1.17e-12	69.3
g11889.t1	I1RCH8#PHI:1921#GzZC236#5518#Fusarium_graminearum#reduced_virulence	75.664	0	1375
g12020.t1	I1S1V3#PHI:1238#FGSG_10725#5518#Fusarium_graminearum#lethal	75.643	0	1211
g968.t1	G4MTI8#PHI:6455#MoYcp4#318829#Magnaporthe_oryzae#reduced_virulence	75.622	5.07e-104	302
g7602.t1	I1RQN6#PHI:1974#GzZC289#5518#Fusarium_graminearum#unaffected_pathogenicity	75.585	0	967
g5822.t1	G4MTN1#PHI:6348__PHI:8233#MoPmt2__MoPmt2_(MGG_07190)#318829#Magnaporthe_oryzae#reduced_virulence	75.57	0	1193
g10730.t1	I1S0X7#PHI:1419#GzC2H086#5518#Fusarium_graminearum#unaffected_pathogenicity	75.549	3.57e-158	448
g987.t1	W7MS09#PHI:3385#FVEG_12529#117187#Fusarium_verticillioides#unaffected_pathogenicity	75.52	0	662
g11351.t1	G4MSK7#PHI:7149#Moglo3#318829#Magnaporthe_oryzae#reduced_virulence	75.51	0	692
g3972.t1	I1RRQ8#PHI:1211#(Sc_Ctk1)#5518#Fusarium_graminearum#reduced_virulence	75.456	0	734
g8703.t1	G4MNE6#PHI:2109#CNB#318829#Magnaporthe_oryzae#reduced_virulence__loss_of_pathogenicity	75.455	1.49e-106	307
g4888.t1	I1RWL9#PHI:1079#Pls1#5518#Fusarium_graminearum#unaffected_pathogenicity	75.446	4.18e-131	372
g1718.t1	I1RLD6#PHI:5840#Fgsg04731#5518#Fusarium_graminearum#unaffected_pathogenicity	75.443	0	634
g11236.t1	I1RW84#PHI:6183#FgVps27#5518#Fusarium_graminearum#reduced_virulence	75.366	0	1053
g373.t1	I1RAE5#PHI:1208__PHI:3131#(Sc_Sch9)__FgSCH9#5518#Fusarium_graminearum#reduced_virulence	75.359	0	1273
g8869.t1	Q6B957#PHI:490#FRP1#5507#Fusarium_oxysporum#loss_of_pathogenicity	75.322	0	813
g8853.t1	I1RCM1#PHI:1353#GzC2H013#5518#Fusarium_graminearum#reduced_virulence	75.304	0	1025
g4879.t1	I1S8Y4#PHI:1338#GzbZIP020#5518#Fusarium_graminearum#unaffected_pathogenicity	75.235	1.74e-157	446
g1146.t1	Q96VZ3#PHI:181#PGX1#5507#Fusarium_oxysporum#unaffected_pathogenicity	75.234	0	669
g249.t1	I1RYQ5#PHI:1246#FGSG_09513#5518#Fusarium_graminearum#unaffected_pathogenicity	75.228	0	1425
g9481.t1	I1S248#PHI:8914#FgVPS24_(FGSG_10832)#5518#Fusarium_graminearum#lethal	75.217	4.72e-107	311
g3448.t1	N4VBG2#PHI:6970#copag1#5465#Colletotrichum_orbiculare#reduced_virulence	75.213	0	3842
g8826.t1	I1RCP1#PHI:1080#Cch1#5518#Fusarium_graminearum#unaffected_pathogenicity	75.201	0	3183
g3431.t1	I1RFP4#PHI:1441#GzDDT#5518#Fusarium_graminearum#reduced_virulence	75.197	0	1463
g6097.t1	I1RE49#PHI:7111#FgCAP1#5518#Fusarium_graminearum#reduced_virulence	75.187	0	773
g2884.t1	J5K8H0#PHI:4990#ras3#176275#Beauveria_bassiana#reduced_virulence	75.185	2.19e-139	397
g1034.t1	I1RNL0#PHI:2409#FgMT2#5518#Fusarium_graminearum#reduced_virulence	75.175	0	913
g1268.t1	G2XIG8#PHI:7173#HiC-15#27337#Verticillium_dahliae#reduced_virulence	75.143	0	871
g7345.t1	W7NEP8#PHI:7286#FvCP02#117187#Fusarium_verticillioides#unaffected_pathogenicity__reduced_virulence	75.13	0	1176
g11845.t1	Q4IB89#PHI:1224#FGSG_05519#5518#Fusarium_graminearum#lethal	75.129	0	3593
g11273.t1	Q00845#PHI:180#PELD#140110#Nectria_haematococca#reduced_virulence	75.107	1.2e-130	371
g4637.t1	I1RA01#PHI:1537#MYT1#5518#Fusarium_graminearum#unaffected_pathogenicity	75.084	8.04e-144	416
g3246.t1	E9F2M8#PHI:7757#Mrpem_(MAA_06426)#568076#Metarhizium_robertsii#unaffected_pathogenicity	75.077	0	1524
g3672.t1	I1S7I6#PHI:1429#GzC2H097#5518#Fusarium_graminearum#unaffected_pathogenicity	75.071	0	1018
g2994.t1	I1RXD6#PHI:1535#GzMADS002#5518#Fusarium_graminearum#unaffected_pathogenicity	75.057	0	694
g5426.t1	Q4WGR1#PHI:2541#OLE1#746128#Aspergillus_fumigatus#lethal	75.057	0	721
g3733.t1	I1RAP2#PHI:1987#GzZC302#5518#Fusarium_graminearum#reduced_virulence	75.053	0	1396
g6392.t1	Q0V515#PHI:3914#Sdh1#13684#Parastagonospora_nodorum#reduced_virulence	75.051	0	759
g5592.t1	I1RQS8#PHI:1379#GzC2H042#5518#Fusarium_graminearum#reduced_virulence	75	0	808
g6762.t1	I1RJD6#PHI:2408#FgMT1#5518#Fusarium_graminearum#unaffected_pathogenicity	75	0	803
g8689.t1	I1RT91#PHI:1388#GzC2H051#5518#Fusarium_graminearum#unaffected_pathogenicity	75	0	509
g9959.t1	I1RGC9#PHI:1359#GzC2H019#5518#Fusarium_graminearum#unaffected_pathogenicity	75	6.04e-62	191
g6356.t1	I1RS57#PHI:1253#FGSG_06970#5518#Fusarium_graminearum#unaffected_pathogenicity	74.857	0	1789
g460.t1	Q4X099#PHI:2638#Ilv3A#746128#Aspergillus_fumigatus#reduced_virulence	74.829	0	870
g10158.t1	I1RBF6#PHI:1565#GzOB005#5518#Fusarium_graminearum#unaffected_pathogenicity	74.825	0	887
g734.t1	Q4IA62#PHI:1674#GzDHHC002#5518#Fusarium_graminearum#unaffected_pathogenicity	74.78	0	815
g9225.t1	I1RY79#PHI:1943#GzZC258#5518#Fusarium_graminearum#unaffected_pathogenicity	74.776	0	1356
g9774.t1	I1S2C5#PHI:1783#GzZC098#5518#Fusarium_graminearum#unaffected_pathogenicity	74.769	0	982
g7431.t1	I1RW42#PHI:5783#Fgsg08496#5518#Fusarium_graminearum#unaffected_pathogenicity	74.766	3.32e-173	486
g12283.t1	Q4WUA3#PHI:2532#HEM15#746128#Aspergillus_fumigatus#lethal	74.693	0	630
g6279.t1	O60038#PHI:1034#Cpcat1#5111#Claviceps_purpurea#unaffected_pathogenicity	74.685	0	1118
g6776.t1	J4KQD8#PHI:6875#BbVmaH#176275#Beauveria_bassiana#reduced_virulence	74.653	0	759
g3418.t1	I1RFQ3#PHI:1543#GzMyb007#5518#Fusarium_graminearum#unaffected_pathogenicity	74.653	9.69e-135	393
g8113.t1	G4MV96#PHI:3823#MET13#318829#Magnaporthe_oryzae#loss_of_pathogenicity	74.629	0	1000
g7499.t1	Q876Z6#PHI:375#REN1#5507#Fusarium_oxysporum#unaffected_pathogenicity	74.601	0	1085
g3566.t1	F5B5Y4#PHI:6206#BbCypC#176275#Beauveria_bassiana#unaffected_pathogenicity	74.534	4.22e-92	268
g6399.t1	Q0U2A0#PHI:2255#Abd1#13684#Parastagonospora_nodorum#unaffected_pathogenicity	74.521	0	568
g4954.t1	I1RFY9#PHI:1357#GzC2H017#5518#Fusarium_graminearum#unaffected_pathogenicity	74.476	0	1247
g1040.t1	Q9C1E9#PHI:226#PEX6#5462#Colletotrichum_lagenaria#loss_of_pathogenicity	74.457	0	1977
g6321.t1	J4WK53#PHI:8672#phr2_(EJP70165)#176275#Beauveria_bassiana#unaffected_pathogenicity	74.444	0	954
g10637.t1	Q51LD2#PHI:2071#Moatg3#318829#Magnaporthe_oryzae#loss_of_pathogenicity	74.438	0	515
g10151.t1	I1RBE8#PHI:9047#FgPah1_(FGSG_00866)#5518#Fusarium_graminearum#reduced_virulence	74.43	0	1128
g8032.t1	I1RD84#PHI:1355#GzC2H015#5518#Fusarium_graminearum#unaffected_pathogenicity	74.387	0	531
g9497.t1	I1RY51#PHI:1333#GzbZIP015#5518#Fusarium_graminearum#unaffected_pathogenicity	74.348	2.57e-107	322
g9706.t1	G9MQ09#PHI:8509#tex10#29875#Trichoderma_virens#increased_virulence_(hypervirulence)	74.269	0	514
g251.t1	J4KMX0#PHI:7152#pmcB#176275#Beauveria_bassiana#reduced_virulence	74.179	0	1891
g1056.t1	O42772#PHI:822#Ip#1047171#Zymoseptoria_tritici#chemistry_target:_resistance_to_chemical	74.157	3.86e-150	425
g7577.t1	A0A0D2XVZ5#PHI:5236#Dnj1#5507#Fusarium_oxysporum#reduced_virulence	74.144	0	803
g697.t1	I1RPF6#PHI:1878#GzZC193#5518#Fusarium_graminearum#unaffected_pathogenicity	74.127	0	1214
g3955.t1	I1RRS3#PHI:1816#GzZC131#5518#Fusarium_graminearum#unaffected_pathogenicity	74.074	0	1303
g3525.t1	I1RWW4#PHI:1331__PHI:3111__PHI:4023#GzbZIP013__FgAP1__Fgap1#5518#Fusarium_graminearum#unaffected_pathogenicity	73.942	0	794
g526.t1	I1RFN8#PHI:1166#ATG15#5518#Fusarium_graminearum#reduced_virulence	73.92	0	885
g11533.t1	I1RC64#PHI:1554#GzMyb018#5518#Fusarium_graminearum#unaffected_pathogenicity	73.75	0	1104
g12718.t1	I1RBM2#PHI:2395#GzSYN1#5518#Fusarium_graminearum#reduced_virulence	73.74	6.06e-169	483
g5750.t1	J5JEX5#PHI:3097#Kre2/Mnt1#176275#Beauveria_bassiana#reduced_virulence	73.735	0	763
g3115.t1	I1RJX5#PHI:5870#Fgsg04159#5518#Fusarium_graminearum#unaffected_pathogenicity	73.727	0	560
g9439.t1	I6YDU0#PHI:2907#Cyp51A#5518#Fusarium_graminearum#unaffected_pathogenicity__reduced_virulence	73.705	0	791
g8388.t1	Q8TFN5#PHI:1055#CgCHSIII#31870#Colletotrichum_graminicola#unaffected_pathogenicity	73.701	0	1405
g9834.t1	I1REK5#PHI:733#FBP1#5518#Fusarium_graminearum#reduced_virulence	73.691	0	1042
g3427.t1	I1RFP7#PHI:1935#GzZC250#5518#Fusarium_graminearum#unaffected_pathogenicity	73.684	0	1409
g8795.t1	W7MCU7#PHI:7597#FvDim5#117187#Fusarium_verticillioides#reduced_virulence	73.684	1.3e-179	504
g11174.t1	Q4WLT4#PHI:2533#FKS1#746128#Aspergillus_fumigatus#lethal	73.657	0	2916
g10127.t1	I1RYY1#PHI:1757#GzZC072#5518#Fusarium_graminearum#unaffected_pathogenicity	73.655	0	1078
g3168.t1	G4MRZ0#PHI:773__PHI:791__PHI:2141#MGG_11899__CDC15#318829#Magnaporthe_oryzae#reduced_virulence__loss_of_pathogenicity	73.624	0	654
g5837.t1	I1RC37#PHI:1302#GzbHLH003#5518#Fusarium_graminearum#unaffected_pathogenicity	73.608	0	577
g5049.t1	Q524W4#PHI:2084#Moatg18#318829#Magnaporthe_oryzae#reduced_virulence	73.585	0	680
g3898.t1	I1S028#PHI:3374#FgSln1#5518#Fusarium_graminearum#reduced_virulence	73.58	0	1622
g9998.t1	I1RCJ0#PHI:1304#GzbHLH005#5518#Fusarium_graminearum#reduced_virulence	73.492	0	738
g7038.t1	A8QJI7#PHI:1020__PHI:1022__PHI:2362#XlnR__XLNR#5507#Fusarium_oxysporum#unaffected_pathogenicity	73.467	0	1352
g355.t1	G4MTZ0#PHI:2114#Calnexin#318829#Magnaporthe_oryzae#loss_of_pathogenicity	73.446	0	777
g8483.t1	Q96WW9#PHI:258#GPABC1#5128#Fusarium_sambucinum#reduced_virulence	73.406	0	2306
g3240.t1	G4MTK2#PHI:5232#MoARG1#318829#Magnaporthe_oryzae#loss_of_pathogenicity	73.381	0	644
g12865.t1	I1RG27#PHI:1442#GzDNL#5518#Fusarium_graminearum#unaffected_pathogenicity	73.333	3.63e-27	103
g7028.t1	I1RE91#PHI:8925#FgPLD2_(FGSG_01973)#5518#Fusarium_graminearum#unaffected_pathogenicity	73.309	0	1282
g9833.t1	H8ZZ79#PHI:2710#mepB#474922#Colletotrichum_gloeosporioides#reduced_virulence	73.3	0	613
g7144.t1	Q9P304#PHI:199#AOX1#5499#Passalora_fulva#reduced_virulence	73.233	0	1039
g11617.t1	I1RVT7#PHI:1790#GzZC105#5518#Fusarium_graminearum#lethal	73.21	0	1167
g6274.t1	G4N7K8#PHI:9032#Mocrn1_(MGG_06389)#318829#Magnaporthe_oryzae#reduced_virulence__unaffected_pathogenicity	73.194	0	915
g9525.t1	Q8NJS2#PHI:697#ugt51E1#5022#Leptosphaeria_maculans#unaffected_pathogenicity	73.158	0	592
g4660.t1	I1RA15#PHI:446__PHI:2348#TBL1__FTL1_(TBL1)#5518#Fusarium_graminearum#reduced_virulence	73.148	0	873
g11903.t1	I1RA24#PHI:1342#GzC2H002#5518#Fusarium_graminearum#unaffected_pathogenicity	73.118	2.42e-42	149
g9714.t1	M7THD3#PHI:6627#BcCPA1#40559#Botrytis_cinerea#reduced_virulence	73.092	2.17e-131	376
g11019.t1	U6ZIB1#PHI:7624#Vfme#1089444#Dickeya_solani#reduced_virulence__unaffected_pathogenicity	72.957	0	741
g683.t1	I1RP98#PHI:1621#GzRUM1#5518#Fusarium_graminearum#unaffected_pathogenicity	72.956	0	2546
g4377.t1	A0A0A2JZB1#PHI:8722__PHI:8724#PeCat__PeSat#27334#Penicillium_expansum#unaffected_pathogenicity__reduced_virulence	72.949	0	868
g6446.t1	I1S4P4#PHI:1217#FGSG_00792#5518#Fusarium_graminearum#reduced_virulence	72.946	0	1515
g5957.t1	Q5AJB1#PHI:3321#Tfp1#5476#Candida_albicans#loss_of_pathogenicity	72.941	0	914
g691.t1	I1RPG1#PHI:1326#GzbZIP008#5518#Fusarium_graminearum#unaffected_pathogenicity	72.93	0	749
g11496.t1	I1RAL4#PHI:1300#GzbHLH001#5518#Fusarium_graminearum#unaffected_pathogenicity	72.907	0	895
g8170.t1	I1RRX1#PHI:1382#GzC2H045#5518#Fusarium_graminearum#reduced_virulence	72.857	0	698
g8461.t1	I1RHJ0#PHI:1907#GzZC222#5518#Fusarium_graminearum#unaffected_pathogenicity	72.846	0	1125
g5764.t1	I1RMC1#PHI:1678#GzGRF#5518#Fusarium_graminearum#unaffected_pathogenicity	72.8	0	555
g7119.t1	G4NGP6#PHI:2097#Neo1#318829#Magnaporthe_oryzae#loss_of_pathogenicity	72.783	0	1894
g11020.t1	I1RD74#PHI:1961#GzZC276#5518#Fusarium_graminearum#unaffected_pathogenicity	72.759	0	1196
g3064.t1	I1RDX3#PHI:1254#FGSG_01842#5518#Fusarium_graminearum#unaffected_pathogenicity	72.752	0	1011
g10737.t1	I1S0W9#PHI:1418#GzC2H085#5518#Fusarium_graminearum#lethal	72.7	2.22e-165	468
g12332.t1	E9EJG5#PHI:7756#Mrpct_(MAA_00035)#568076#Metarhizium_robertsii#reduced_virulence	72.687	0	613
g4582.t1	I1RAW2#PHI:1345#GzC2H005#5518#Fusarium_graminearum#unaffected_pathogenicity	72.683	2.59e-100	295
g12041.t1	Q4X0J6#PHI:2517#TRPS#746128#Aspergillus_fumigatus#lethal	72.629	0	1104
g7692.t1	A0A1C3YMR4#PHI:5866#Fgsg03237#5518#Fusarium_graminearum#unaffected_pathogenicity	72.603	0	519
g12015.t1	I1S1U7#PHI:2352__PHI:2354#AMT2#5518#Fusarium_graminearum#unaffected_pathogenicity__reduced_virulence	72.538	0	791
g12285.t1	G4N572#PHI:5047__PHI:6635#MoFis1#318829#Magnaporthe_oryzae#reduced_virulence	72.5	2.58e-77	230
g2830.t1	Q4HY90#PHI:1525#GzHOMEL035#5518#Fusarium_graminearum#unaffected_pathogenicity	72.468	0	820
g11979.t1	Q8J286#PHI:244#CLAP1#290576#Colletotrichum_lindemuthianum#loss_of_pathogenicity	72.44	0	1675
g3620.t1	I1RNJ6#PHI:5784#Fgsg05579#5518#Fusarium_graminearum#unaffected_pathogenicity	72.423	7.15e-180	511
g12459.t1	I1RQT9#PHI:5873#Fgsg06439#5518#Fusarium_graminearum#unaffected_pathogenicity	72.394	0	528
g12694.t1	J5JIF8#PHI:7153#pmcC#176275#Beauveria_bassiana#reduced_virulence	72.353	0	1644
g9947.t1	I1RGE3#PHI:1360#GzC2H020#5518#Fusarium_graminearum#unaffected_pathogenicity	72.347	0	781
g9155.t1	G4MXG4#PHI:2095#Calcium-transporting_ATPase_3#318829#Magnaporthe_oryzae#reduced_virulence	72.316	0	1559
g10824.t1	U6ZIB1#PHI:7624#Vfme#1089444#Dickeya_solani#reduced_virulence__unaffected_pathogenicity	72.313	2e-141	444
g6994.t1	I1RMI1#PHI:1325#GzbZIP007#5518#Fusarium_graminearum#reduced_virulence	72.302	1.63e-131	377
g7445.t1	G5EHZ3#PHI:9055#MoIVD_(MGG_02540)#318829#Magnaporthe_oryzae#reduced_virulence	72.296	0	560
g8577.t1	I1RZ94#PHI:1649#GzWing021#5518#Fusarium_graminearum#unaffected_pathogenicity	72.281	3.28e-128	368
g6381.t1	I1RS43#PHI:1585#GzOB025#5518#Fusarium_graminearum#unaffected_pathogenicity	72.251	0	594
g3521.t1	I1RIP6#PHI:5830#Fgsg03688#5518#Fusarium_graminearum#unaffected_pathogenicity	72.093	5.09e-82	251
g2155.t1	I1RRG4#PHI:1380#GzC2H043#5518#Fusarium_graminearum#unaffected_pathogenicity	72.079	0	727
g8846.t1	I1RCM6#PHI:1273#FGSG_01347#5518#Fusarium_graminearum#unaffected_pathogenicity	72.048	0	1768
g4901.t1	I1RN13#PHI:1010#SID1#5518#Fusarium_graminearum#reduced_virulence	71.993	0	828
g7136.t1	G2XE04#PHI:7873#VdSec22#27337#Verticillium_dahliae#reduced_virulence	71.963	3.73e-116	333
g4854.t1	I1RWP3#PHI:6198#SOD1#5518#Fusarium_graminearum#reduced_virulence	71.951	1.24e-77	231
g5972.t1	O42621#PHI:121#PTH3#318829#Magnaporthe_oryzae#loss_of_pathogenicity	71.946	6.92e-115	330
g1574.t1	G4MKI0#PHI:2118__PHI:5540#MgSM1__MSP1#318829#Magnaporthe_oryzae#effector_(plant_avirulence_determinant)__increased_virulence_(hypervirulence)	71.942	6.42e-66	199
g6495.t1	I1RB45#PHI:1301#GzbHLH002#5518#Fusarium_graminearum#unaffected_pathogenicity	71.93	4.78e-48	153
g4794.t1	G4NJD1#PHI:2171#Peroxisomal_copper_amine_oxidase#318829#Magnaporthe_oryzae#reduced_virulence	71.875	0	1084
g2919.t1	I1RNY7#PHI:1181#(Sc_Kic1)#5518#Fusarium_graminearum#reduced_virulence	71.812	0	995
g9490.t1	G4MVK9#PHI:5017#MoPEX11A#318829#Magnaporthe_oryzae#reduced_virulence	71.795	2.1e-122	350
g4401.t1	G4NB58#PHI:5471#MoDac#318829#Magnaporthe_oryzae#reduced_virulence	71.788	0	598
g9682.t1	Q696X2#PHI:414#GOX1#13684#Parastagonospora_nodorum#unaffected_pathogenicity	71.787	2.29e-177	497
g2766.t1	I1RJ45#PHI:6120#FGSG_03846#5518#Fusarium_graminearum#reduced_virulence	71.749	0	645
g5744.t1	I1RG68#PHI:1544#GzMyb008#5518#Fusarium_graminearum#unaffected_pathogenicity	71.642	2.69e-62	209
g5746.t1	Q4WK65#PHI:2639#Ilv3B#746128#Aspergillus_fumigatus#unaffected_pathogenicity__reduced_virulence	71.639	0	793
g7829.t1	J5JB66#PHI:7035#Pmt1#176275#Beauveria_bassiana#reduced_virulence	71.637	0	1423
g7490.t1	G4N471#PHI:2098#Calcium-transporting_ATPase_3#318829#Magnaporthe_oryzae#loss_of_pathogenicity	71.625	0	1603
g7857.t1	I1RX64#PHI:1407#GzC2H071#5518#Fusarium_graminearum#lethal	71.594	0	983
g4842.t1	I1RYH0#PHI:6409#FgCdc11#5518#Fusarium_graminearum#reduced_virulence	71.569	8.53e-37	143
g5401.t1	A0A1C3YMM6#PHI:5794#Fgsg12490#5518#Fusarium_graminearum#unaffected_pathogenicity	71.498	0	577
g9868.t1	Q874F3#PHI:391#ABC2#318829#Magnaporthe_oryzae#unaffected_pathogenicity	71.459	0	2146
g700.t1	I1RPF7#PHI:1704#GzZC019#5518#Fusarium_graminearum#unaffected_pathogenicity	71.455	0	785
g4699.t1	G4N1P8#PHI:5440#ABA4#318829#Magnaporthe_oryzae#reduced_virulence	71.429	1.15e-135	386
g6483.t1	I1RB25#PHI:1473#GzHMG005#5518#Fusarium_graminearum#reduced_virulence	71.39	1.5e-162	462
g11363.t1	I1RUD7#PHI:1811#GzZC126#5518#Fusarium_graminearum#unaffected_pathogenicity	71.364	5.46e-112	342
g5973.t1	A4R5F6#PHI:5234#MoARG7#318829#Magnaporthe_oryzae#reduced_virulence	71.333	0	654
g5909.t1	I1RLX6#PHI:1192#(Sc_Cak1)#5518#Fusarium_graminearum#reduced_virulence	71.268	1.41e-178	523
g6909.t1	I1RQD8#PHI:1614#GzSART1#5518#Fusarium_graminearum#unaffected_pathogenicity	71.259	0	830
g3403.t1	I1RFR7#PHI:1944#GzZC259#5518#Fusarium_graminearum#unaffected_pathogenicity	71.196	0	786
g4903.t1	I1RN15#PHI:1456#GzAra004#5518#Fusarium_graminearum#unaffected_pathogenicity	71.192	0	968
g2999.t1	G4NGW8#PHI:3175#MoSnf4#318829#Magnaporthe_oryzae#loss_of_pathogenicity	71.182	8.38e-172	499
g2922.t1	I1S7H5#PHI:1742#GzZC057#5518#Fusarium_graminearum#unaffected_pathogenicity	71.143	0	954
g7470.t1	A9QUB2#PHI:2403#CSN1#169388#Fusarium_solani#increased_virulence_(hypervirulence)__reduced_virulence	71.141	5.69e-154	436
g6071.t1	A0A0C4DHR8#PHI:7682#nit1#5507#Fusarium_oxysporum#unaffected_pathogenicity	71.126	0	1351
g11712.t1	Q9UW03#PHI:202__PHI:1160__PHI:2309#BcatrB#40559#Botrytis_cinerea#unaffected_pathogenicity__reduced_virulence__chemistry_target:_sensitivity_to_chemical	71.125	0	2093
g3443.t1	I1S7R2#PHI:1275#FGSG_12887#5518#Fusarium_graminearum#unaffected_pathogenicity	71.103	0	810
g8175.t1	I1RRX4#PHI:1291#TOP1#5518#Fusarium_graminearum#reduced_virulence	71.058	0	1286
g11217.t1	Q4I2M7#PHI:1676#GzDHHC004#5518#Fusarium_graminearum#unaffected_pathogenicity	71.049	0	962
g11488.t1	I1RAM0#PHI:7125#FgKar9#5518#Fusarium_graminearum#unaffected_pathogenicity	71.004	0	1386
g10544.t1	G2XHI2#PHI:7172#Clp-1#27337#Verticillium_dahliae#reduced_virulence	70.968	0	984
g9382.t1	I1RNA9#PHI:1508#GzHOME003#5518#Fusarium_graminearum#unaffected_pathogenicity	70.948	0	1375
g4642.t1	I1R9Z6#PHI:1989#GzZC304#5518#Fusarium_graminearum#unaffected_pathogenicity	70.933	0	702
g1010.t1	A0MAR2#PHI:2858#FvVE1#117187#Fusarium_verticillioides#loss_of_pathogenicity	70.919	0	702
g12526.t1	Q4WKG5#PHI:2530#TUB1#746128#Aspergillus_fumigatus#lethal__loss_of_pathogenicity	70.889	0	664
g7114.t1	Q1L2E2#PHI:595__PHI:2248#ALS1__Als1#13684#Parastagonospora_nodorum#reduced_virulence__loss_of_pathogenicity	70.847	0	892
g11522.t1	I1RC70#PHI:1303#GzbHLH004#5518#Fusarium_graminearum#unaffected_pathogenicity	70.8	0	663
g12674.t1	A4QVH4#PHI:5187#MoCCP1#318829#Magnaporthe_oryzae#reduced_virulence	70.765	0	521
g339.t1	J4KLZ9#PHI:7155#pmr1#176275#Beauveria_bassiana#reduced_virulence	70.703	0	2659
g8012.t1	G4MZ63#PHI:3824#MET12#318829#Magnaporthe_oryzae#unaffected_pathogenicity__loss_of_pathogenicity	70.647	0	1000
g1263.t1	I1RPU1#PHI:1297#GzAT001#5518#Fusarium_graminearum#reduced_virulence	70.578	0	1413
g9535.t1	I1S215#PHI:2400#Fgp2#5518#Fusarium_graminearum#unaffected_pathogenicity	70.575	0	571
g6401.t1	I1RAW4#PHI:7193#FgLaeA#5518#Fusarium_graminearum#reduced_virulence	70.55	1.39e-165	466
g7022.t1	G4MRN1#PHI:7318#noxD#318829#Magnaporthe_oryzae#loss_of_pathogenicity	70.548	5.73e-74	220
g6002.t1	I1RPZ1#PHI:1517#GzHOMEL013#5518#Fusarium_graminearum#lethal	70.516	0	1139
g6068.t1	B5M4A8#PHI:2116__PHI:2301#CHS7#318829#Magnaporthe_oryzae#reduced_virulence	70.511	0	1005
g8597.t1	I1RYV4#PHI:1449#GzGATA007#5518#Fusarium_graminearum#unaffected_pathogenicity	70.495	0	723
g10216.t1	I1RRB9#PHI:1229#FGSG_06637#5518#Fusarium_graminearum#lethal	70.463	0	669
g4128.t1	I1S3G2#PHI:5817#Fgsg11343#5518#Fusarium_graminearum#unaffected_pathogenicity	70.455	0	551
g154.t1	I1RQ92#PHI:1487#GzHMG019#5518#Fusarium_graminearum#unaffected_pathogenicity	70.44	0	1112
g9216.t1	I1RZ82#PHI:1612#GzP53L005#5518#Fusarium_graminearum#unaffected_pathogenicity	70.44	1.62e-140	409
g221.t1	A0A0J9UIM0#PHI:7685#AreA#5507#Fusarium_oxysporum#increased_virulence_(hypervirulence)	70.408	0	1268
g11168.t1	I1RUQ2#PHI:1397#GzC2H060#5518#Fusarium_graminearum#unaffected_pathogenicity	70.408	4.83e-49	155
g3292.t1	G4MT58#PHI:5480#MoPyr5#318829#Magnaporthe_oryzae#reduced_virulence	70.404	5.95e-111	321
g10998.t1	J4UPL6#PHI:5394#mas5#176275#Beauveria_bassiana#loss_of_pathogenicity	70.396	0	548
g4977.t1	I1RV65#PHI:1398#GzC2H061#5518#Fusarium_graminearum#unaffected_pathogenicity	70.34	0	950
g9559.t1	I1RA50#PHI:1453#GzAra001#5518#Fusarium_graminearum#lethal	70.333	0	927
g8843.t1	I1RCM9#PHI:1354#GzC2H014#5518#Fusarium_graminearum#reduced_virulence	70.31	0	776
g8598.t1	I1RYV5#PHI:1514#GzHOME012#5518#Fusarium_graminearum#unaffected_pathogenicity	70.27	0	1701
g11667.t1	Q9C4A0#PHI:2817#Aapg1#5599#Alternaria_alternata#unaffected_pathogenicity	70.262	1.85e-159	456
g1314.t1	G4MLK2#PHI:8040__PHI:8047#Mouba2__Uba2#318829#Magnaporthe_oryzae#reduced_virulence	70.225	0	773
g6214.t1	I1RL30#PHI:1094#FGSG_04610#5518#Fusarium_graminearum#unaffected_pathogenicity	70.221	0	794
g3473.t1	J5JMB3#PHI:6746#Mdj1#176275#Beauveria_bassiana#reduced_virulence	70.149	0	717
g3945.t1	I1RZS5#PHI:2396#GzSYN2#5518#Fusarium_graminearum#reduced_virulence	70.122	1.63e-161	457
g11410.t1	I1RHB3#PHI:1923#GzZC238#5518#Fusarium_graminearum#unaffected_pathogenicity	70.093	2.06e-51	174
g4753.t1	J4KQS2#PHI:8671#phr1_(EJP69699)#176275#Beauveria_bassiana#unaffected_pathogenicity	70.087	0	871
g9950.t1	I1RGD9#PHI:1941#GzZC256#5518#Fusarium_graminearum#unaffected_pathogenicity	70.067	0	1045
g661.t1	I1RXE8#PHI:1763#GzZC078#5518#Fusarium_graminearum#unaffected_pathogenicity	70.056	0	987
g11328.t1	G4N6R6#PHI:7113#MoERR2#318829#Magnaporthe_oryzae#unaffected_pathogenicity	70.032	9.21e-161	457
g6906.t1	Q4WNW5#PHI:2970#argB#746128#Aspergillus_fumigatus#unaffected_pathogenicity	70	3.44e-179	505
g5160.t1	I1RS32#PHI:1180#(Sc_Sat4)#5518#Fusarium_graminearum#reduced_virulence	70	2.56e-148	449
g11202.t1	I1RUM9#PHI:1396#GzC2H059#5518#Fusarium_graminearum#reduced_virulence	69.986	0	868
g4466.t1	G2WY50#PHI:4909#VdQase#27337#Verticillium_dahliae#reduced_virulence	69.971	4.25e-179	527
g12395.t1	G4MRB4#PHI:4491#SHM#318829#Magnaporthe_oryzae#reduced_virulence	69.96	0	710
g7027.t1	I1RE92#PHI:1097#FGSG_01974#5518#Fusarium_graminearum#reduced_virulence	69.903	2.42e-106	307
g6499.t1	I1S4Q3#PHI:1756#GzZC071#5518#Fusarium_graminearum#unaffected_pathogenicity	69.828	1.94e-42	167
g493.t1	G4NIS9#PHI:785#MGG_04128#318829#Magnaporthe_oryzae#reduced_virulence	69.776	0	785
g4400.t1	I1RVV2#PHI:1611#GzP53L004#5518#Fusarium_graminearum#unaffected_pathogenicity	69.754	0	742
g8657.t1	I1S3J7#PHI:1424#GzC2H092#5518#Fusarium_graminearum#unaffected_pathogenicity	69.737	8.82e-27	117
g12834.t1	F0XP73#PHI:2693#GcABC-G1#226899#Grosmannia_clavigera#reduced_virulence	69.727	0	2154
g9945.t1	I1RGE1#PHI:4042#spt8#5518#Fusarium_graminearum#reduced_virulence	69.725	0	853
g3278.t1	E2GL14#PHI:2334#BcNma#40559#Botrytis_cinerea#reduced_virulence	69.715	0	1471
g8370.t1	B9DR51#PHI:1133#Lmepi#5022#Leptosphaeria_maculans#loss_of_pathogenicity	69.705	0	514
g4440.t1	I1RJA3#PHI:1881#GzZC196#5518#Fusarium_graminearum#unaffected_pathogenicity	69.651	0	682
g6113.t1	I1RJS9#PHI:2326__PHI:2491__PHI:5720#PTC1__FgPTC1__ScOrtholog_PTC1#5518#Fusarium_graminearum#reduced_virulence__unaffected_pathogenicity	69.603	0	704
g6576.t1	I1RTA6#PHI:3863#FgGAL83#5518#Fusarium_graminearum#reduced_virulence	69.565	0	619
g12569.t1	I1RXK4#PHI:1823#GzZC138#5518#Fusarium_graminearum#unaffected_pathogenicity	69.565	0	577
g7111.t1	I1RSY2#PHI:1588#GzOB028#5518#Fusarium_graminearum#lethal	69.565	1.89e-66	201
g7315.t1	I1RTL1#PHI:1245#FGSG_07520#5518#Fusarium_graminearum#unaffected_pathogenicity	69.512	0	995
g6552.t1	I1S8F7#PHI:1820#GzZC135#5518#Fusarium_graminearum#unaffected_pathogenicity	69.492	7.74e-147	429
g9097.t1	O59928#PHI:144#CHT42#29875#Trichoderma_virens#reduced_virulence	69.479	0	593
g10508.t1	I1RIS2#PHI:5353#Famfs1#282267#Fusarium_asiaticum#reduced_virulence	69.474	0	749
g9817.t1	I1REJ1#PHI:1662#GzCCHC002#5518#Fusarium_graminearum#unaffected_pathogenicity	69.461	0	715
g11036.t1	A0A1C3YMR1#PHI:5788#Fgsg03215#5518#Fusarium_graminearum#unaffected_pathogenicity	69.453	8.17e-154	438
g472.t1	I1REH9#PHI:1932#GzZC247#5518#Fusarium_graminearum#unaffected_pathogenicity	69.45	0	656
g407.t1	Q2KN79#PHI:522__PHI:2808#GAS1__gas1#5507#Fusarium_oxysporum#reduced_virulence	69.444	0	756
g12628.t1	I1RI51#PHI:5792#Fgsg03476#5518#Fusarium_graminearum#unaffected_pathogenicity	69.43	0	527
g10221.t1	E9F1A7#PHI:6380#mrLPAAT1#568076#Metarhizium_robertsii#reduced_virulence	69.416	1.95e-150	427
g6881.t1	I1RQI2#PHI:1195#(Sc_Bck1)#5518#Fusarium_graminearum#reduced_virulence	69.401	0	2038
g6174.t1	I1S3J8#PHI:5800#Fgsg11385#5518#Fusarium_graminearum#unaffected_pathogenicity	69.382	0	519
g815.t1	G4ML12#PHI:6739#MoGls2#318829#Magnaporthe_oryzae#reduced_virulence	69.379	0	1397
g10466.t1	I1RDE2#PHI:1960#GzZC275#5518#Fusarium_graminearum#unaffected_pathogenicity	69.254	0	1303
g1242.t1	I1RDZ2#PHI:5809#Fgsg01861#5518#Fusarium_graminearum#unaffected_pathogenicity	69.163	0	608
g10137.t1	A4RJV3#PHI:6135__PHI:6636#PEF1__MoMdv1#318829#Magnaporthe_oryzae#reduced_virulence	69.159	0	878
g9053.t1	I1RIQ3#PHI:1575#GzOB015#5518#Fusarium_graminearum#unaffected_pathogenicity	69.136	9.54e-117	337
g5745.t1	I1RG67#PHI:1515#GzHOMEL009#5518#Fusarium_graminearum#unaffected_pathogenicity	69.118	3.24e-152	435
g6385.t1	F9X691#PHI:4914#ZtCBR1#1047171#Zymoseptoria_tritici#reduced_virulence	69.112	2.01e-124	362
g11989.t1	I1RC01#PHI:1506#GzHOME001#5518#Fusarium_graminearum#unaffected_pathogenicity	69.019	0	735
g10598.t1	I1RJM8#PHI:1206#(Sp_Prp4)#5518#Fusarium_graminearum#reduced_virulence	68.956	0	876
g5188.t1	I1RGG4#PHI:1713#GzZC028#5518#Fusarium_graminearum#unaffected_pathogenicity	68.865	0	882
g9899.t1	I1S0C1#PHI:1668#GzCCHC008#5518#Fusarium_graminearum#unaffected_pathogenicity	68.779	0	620
g1999.t1	I1RLM4#PHI:1977#GzZC292#5518#Fusarium_graminearum#unaffected_pathogenicity	68.776	0	921
g11187.t1	W7N0U7#PHI:7145#FvSEL1#117187#Fusarium_verticillioides#reduced_virulence	68.776	0	1229
g6055.t1	G4XVC0#PHI:2302#CHS5#318829#Magnaporthe_oryzae#loss_of_pathogenicity	68.753	0	2530
g1009.t1	I1RCV8#PHI:5786#Fgsg01440#5518#Fusarium_graminearum#unaffected_pathogenicity	68.727	4.26e-132	380
g7588.t1	I1RZJ1#PHI:1615#GzSGT1#5518#Fusarium_graminearum#unaffected_pathogenicity	68.72	0	817
g3629.t1	I1RNK3#PHI:1259#FGSG_05586#5518#Fusarium_graminearum#unaffected_pathogenicity	68.667	0	1337
g5603.t1	I1RQS1#PHI:1262#FGSG_06420#5518#Fusarium_graminearum#unaffected_pathogenicity	68.661	0	1019
g1175.t1	I1S463#PHI:1690#GzZC005#5518#Fusarium_graminearum#unaffected_pathogenicity	68.627	0	696
g4892.t1	I1RN03#PHI:1372#GzC2H035#5518#Fusarium_graminearum#unaffected_pathogenicity	68.627	1.46e-125	367
g7877.t1	I1RWB8#PHI:1402#GzC2H065#5518#Fusarium_graminearum#unaffected_pathogenicity	68.593	0	1063
g4394.t1	I1RVV8#PHI:1312#GzbHLH013#5518#Fusarium_graminearum#unaffected_pathogenicity	68.437	0	1265
g8753.t1	I1RJQ4#PHI:1365#GzC2H025#5518#Fusarium_graminearum#unaffected_pathogenicity	68.412	0	709
g10248.t1	A0A0E0SA40#PHI:7025#FgRav2#5518#Fusarium_graminearum#loss_of_pathogenicity	68.405	9.22e-160	453
g5943.t1	I1RM09#PHI:2325__PHI:2502__PHI:5724#TEP1__FgTep1p__ScOrtholog_TEP1#5518#Fusarium_graminearum#reduced_virulence	68.386	0	817
g2509.t1	G4N1Y8#PHI:2209#endo-1_4-beta-xylanase_[GH10_family]#318829#Magnaporthe_oryzae#reduced_virulence	68.306	9.58e-172	503
g6686.t1	Q9C4A0#PHI:2817#Aapg1#5599#Alternaria_alternata#unaffected_pathogenicity	68.3	3.89e-157	450
g7567.t1	I1RZL0#PHI:1414#GzC2H081#5518#Fusarium_graminearum#unaffected_pathogenicity	68.277	0	601
g2953.t1	I1S1B7#PHI:1422#GzC2H090#5518#Fusarium_graminearum#reduced_virulence	68.244	0	829
g7976.t1	Q4X256#PHI:6556#mecA#746128#Aspergillus_fumigatus#unaffected_pathogenicity__reduced_virulence	68.226	0	676
g2014.t1	I1RLS1#PHI:1369#GzC2H031#5518#Fusarium_graminearum#unaffected_pathogenicity	68.21	2.2e-138	397
g3670.t1	I1RP25#PHI:1225#FGSG_05775#5518#Fusarium_graminearum#lethal	68.207	0	1675
g10028.t1	I1S8Y9#PHI:1182#(Sc_Mec1)#5518#Fusarium_graminearum#reduced_virulence	68.158	0	3448
g11568.t1	I1RVU7#PHI:1789#GzZC104#5518#Fusarium_graminearum#unaffected_pathogenicity	68.133	0	980
g3011.t1	I1RXB9#PHI:1625#GzOpi#5518#Fusarium_graminearum#unaffected_pathogenicity	68.125	1.26e-130	394
g3363.t1	I1ZIN3#PHI:6209#BbCyp9#176275#Beauveria_bassiana#unaffected_pathogenicity	68.1	0	701
g11163.t1	E3QI05#PHI:6826#GAA1#31870#Colletotrichum_graminicola#loss_of_pathogenicity	68.074	0	843
g11145.t1	I1RSJ5#PHI:1489#GzHMG021#5518#Fusarium_graminearum#unaffected_pathogenicity	68.058	0	579
g8940.t1	G4MU60#PHI:6615#Mocapn4#318829#Magnaporthe_oryzae#reduced_virulence	68.041	3.15e-120	348
g1784.t1	I1RYI2#PHI:3373#FgSho1#5518#Fusarium_graminearum#reduced_virulence	68	6.66e-159	450
g12896.t1	G4NCG1#PHI:3234#MoLYS20#318829#Magnaporthe_oryzae#reduced_virulence	67.986	3.3e-136	403
g5783.t1	G4N008#PHI:5395#MoSec62#318829#Magnaporthe_oryzae#reduced_virulence	67.866	9.03e-147	424
g8616.t1	Q8J2P6#PHI:317#RHBA#746128#Aspergillus_fumigatus#reduced_virulence	67.857	3.99e-77	251
g11183.t1	I1RUP1#PHI:1447#GzGATA005#5518#Fusarium_graminearum#unaffected_pathogenicity	67.844	0	1361
g715.t1	Q4WP25#PHI:2542#ERG12#746128#Aspergillus_fumigatus#lethal	67.826	0	650
g12123.t1	G4NHC2#PHI:5034#MoADH1#318829#Magnaporthe_oryzae#unaffected_pathogenicity	67.806	1.54e-176	497
g2089.t1	G4NES9#PHI:784#MGG_00056#318829#Magnaporthe_oryzae#reduced_virulence	67.769	5.68e-109	318
g12048.t1	A0A0L9JQ40#PHI:6892#iscU#28901#Salmonella_enterica#reduced_virulence	67.742	6.68e-57	178
g8666.t1	I1RTB9#PHI:1644#GzRFX1#5518#Fusarium_graminearum#unaffected_pathogenicity	67.686	0	1068
g9098.t1	G7TGB3#PHI:4841#hshC#347#Xanthomonas_oryzae#reduced_virulence	67.647	9.18e-10	56.2
g6519.t1	I1RB67#PHI:1984#GzZC299#5518#Fusarium_graminearum#unaffected_pathogenicity	67.628	0	880
g2372.t1	I1RZU0#PHI:1691#GzZC006#5518#Fusarium_graminearum#unaffected_pathogenicity	67.621	0	623
g10060.t1	Q75T36#PHI:341#CPK1#5462#Colletotrichum_lagenaria#loss_of_pathogenicity	67.601	0	712
g11304.t1	I1RG88#PHI:7649#FgPR-IL-2#5518#Fusarium_graminearum#unaffected_pathogenicity	67.582	1.15e-90	267
g11032.t1	N4VSY8#PHI:5111#FAM1#5465#Colletotrichum_orbiculare#loss_of_pathogenicity	67.574	4.48e-151	437
g2002.t1	Q32WF7#PHI:2269#Mdh1#13684#Parastagonospora_nodorum#unaffected_pathogenicity	67.557	3.76e-134	385
g8111.t1	G3F417#PHI:3703#fvtox1#232082#Fusarium_virguliforme#reduced_virulence	67.532	1.51e-71	215
g8487.t1	I1RHY5#PHI:6125__PHI:5716#FGSG_03402__ScOrtholog_PHO11#5518#Fusarium_graminearum#unaffected_pathogenicity	67.5	0	648
g4507.t1	I1S4M4#PHI:1426#GzC2H094#5518#Fusarium_graminearum#unaffected_pathogenicity	67.49	0	658
g1690.t1	I1RER0#PHI:5860#GCD8#5518#Fusarium_graminearum#unaffected_pathogenicity	67.48	0	517
g11514.t1	I1RC73#PHI:1933__PHI:6134#GzZC248__FHS1#5518#Fusarium_graminearum#reduced_virulence	67.48	0	657
g725.t1	Q9UVG2#PHI:177#ODC#13684#Parastagonospora_nodorum#reduced_virulence	67.447	0	612
g8929.t1	I1RAA6#PHI:1256#FGSG_00433#5518#Fusarium_graminearum#unaffected_pathogenicity	67.444	0	1621
g4917.t1	I1RBK8#PHI:1619#GzJUM001#5518#Fusarium_graminearum#unaffected_pathogenicity	67.442	0	560
g1151.t1	W7M2E5#PHI:3356#Mads2#117187#Fusarium_verticillioides#unaffected_pathogenicity	67.419	0	655
g11062.t1	P58371#PHI:2117#SPM1#318829#Magnaporthe_oryzae#reduced_virulence	67.407	0	724
g11113.t1	I1RSG9#PHI:1466#GzCCAAT006#5518#Fusarium_graminearum#unaffected_pathogenicity	67.347	9.75e-99	290
g6330.t1	J4KR13#PHI:5055#vosA#176275#Beauveria_bassiana#reduced_virulence	67.347	8.51e-93	284
g8738.t1	Q4WQ27#PHI:2519#LYS9#746128#Aspergillus_fumigatus#lethal	67.342	0	606
g12184.t1	I1RFM9#PHI:3983#FGSG_02509.3_(Sc_gpi7)#5518#Fusarium_graminearum#reduced_virulence	67.337	0	1119
g11839.t1	Q9C1T0#PHI:200#ARG1#5507#Fusarium_oxysporum#reduced_virulence	67.325	0	655
g7313.t1	J5K3K8#PHI:7151#pmcA#176275#Beauveria_bassiana#reduced_virulence	67.257	0	1610
g12386.t1	I1S956#PHI:1720#GzZC035#5518#Fusarium_graminearum#unaffected_pathogenicity	67.257	0	724
g6033.t1	I1S297#PHI:8912#FgVPS20_(FGSG_10883)#5518#Fusarium_graminearum#reduced_virulence	67.257	5.25e-87	258
g2323.t1	Q2LK92#PHI:548__PHI:2305#BcPIC5__BcFKBP12#40559#Botrytis_cinerea#reduced_virulence__unaffected_pathogenicity__increased_virulence_(hypervirulence)	67.241	2.35e-48	154
g4435.t1	F9X691#PHI:4914#ZtCBR1#1047171#Zymoseptoria_tritici#reduced_virulence	67.234	6.12e-111	324
g9517.t1	O59939#PHI:222#PELB#474922#Colletotrichum_gloeosporioides#reduced_virulence	67.219	5.69e-123	359
g5054.t1	I1RKA4#PHI:2432#FgRgsA#5518#Fusarium_graminearum#reduced_virulence	67.192	9.77e-135	409
g286.t1	W7LTJ2#PHI:7146#FvHEX1#117187#Fusarium_verticillioides#unaffected_pathogenicity	67.113	0	647
g1070.t1	Q8J0H8#PHI:7228#tre1#318829#Magnaporthe_oryzae#unaffected_pathogenicity	67.111	0	966
g5174.t1	I1RHP9#PHI:5795#Fgsg03310#5518#Fusarium_graminearum#unaffected_pathogenicity	67.109	1.93e-170	485
g8262.t1	H1VQ06#PHI:8878#ChBUB2_(XP_018164413)#80884#Colletotrichum_higginsianum#reduced_virulence	67.102	0	593
g7395.t1	J9N0G7#PHI:1105#FOXG_08661#5507#Fusarium_oxysporum#unaffected_pathogenicity	67.078	6.71e-123	354
g6086.t1	Q5EMY3#PHI:860#MSP1#318829#Magnaporthe_oryzae#reduced_virulence	67.067	0	578
g644.t1	I1RMT5#PHI:1294#GzAPSES002#5518#Fusarium_graminearum#unaffected_pathogenicity	67.045	0	554
g977.t1	Q4IMZ7#PHI:1673#GzDHHC001#5518#Fusarium_graminearum#unaffected_pathogenicity	67.045	0	628
g333.t1	Q4WJ77#PHI:7654#aroB#746128#Aspergillus_fumigatus#reduced_virulence	67.003	0	526
g8008.t1	I1RT69#PHI:1918#GzZC233#5518#Fusarium_graminearum#unaffected_pathogenicity	67.001	0	1226
g12409.t1	I1RMV4#PHI:1464__PHI:8923#GzCCAAT004__FgHLTF1_(FGSG_05304)#5518#Fusarium_graminearum#reduced_virulence	66.99	3.33e-91	268
g11583.t1	F5HAA8#PHI:424#PCK1#5207#Cryptococcus_neoformans#reduced_virulence	66.964	0	637
g7235.t1	I1RS27#PHI:1383#GzC2H046#5518#Fusarium_graminearum#unaffected_pathogenicity	66.914	4e-125	360
g4883.t1	Q1HA66#PHI:6969#cokel2#5465#Colletotrichum_orbiculare#reduced_virulence	66.829	0	1044
g31.t1	F0XP73#PHI:2693#GcABC-G1#226899#Grosmannia_clavigera#reduced_virulence	66.823	0	2056
g9319.t1	I1RK21#PHI:1559#GzNEG001#5518#Fusarium_graminearum#unaffected_pathogenicity	66.797	4.65e-132	377
g5441.t1	Q5XTQ5#PHI:538#FRT1#40559#Botrytis_cinerea#unaffected_pathogenicity	66.792	0	679
g11862.t1	I1RND0#PHI:1900#GzZC215#5518#Fusarium_graminearum#unaffected_pathogenicity	66.789	0	1427
g12542.t1	I1RSR7#PHI:1796#GzZC111#5518#Fusarium_graminearum#unaffected_pathogenicity	66.709	0	1064
g10904.t1	Q4WTH5#PHI:4471#PtcB#746128#Aspergillus_fumigatus#loss_of_pathogenicity	66.667	0	555
g9407.t1	M4Q9U3#PHI:3670#VdATG12#27337#Verticillium_dahliae#unaffected_pathogenicity	66.667	1.11e-58	181
g12172.t1	G4NJH9#PHI:6639#Modnm3#318829#Magnaporthe_oryzae#unaffected_pathogenicity	66.667	8.59e-22	94
g8974.t1	I1S1P9#PHI:1787#GzZC102#5518#Fusarium_graminearum#unaffected_pathogenicity	66.597	0	651
g6548.t1	I1RJK1#PHI:5776#Fgsg04023#5518#Fusarium_graminearum#unaffected_pathogenicity	66.579	0	517
g10779.t1	Q4WMR3#PHI:2526#LUC7#746128#Aspergillus_fumigatus#lethal	66.544	1.46e-118	344
g10136.t1	Q4WVS3#PHI:7652#aroC#746128#Aspergillus_fumigatus#reduced_virulence	66.54	3.67e-126	362
g3120.t1	Q4WZV9#PHI:6555#sF#746128#Aspergillus_fumigatus#unaffected_pathogenicity	66.514	0	2101
g4493.t1	B0YE73#PHI:7591#erg25B#746128#Aspergillus_fumigatus#unaffected_pathogenicity	66.443	7.52e-150	429
g2179.t1	F5HCK8#PHI:415#IPMDH#13684#Parastagonospora_nodorum#loss_of_pathogenicity	66.393	3.04e-171	485
g7384.t1	A0A098DMJ4#PHI:5801#Fgsg04628#5518#Fusarium_graminearum#unaffected_pathogenicity	66.372	0	786
g2136.t1	I1RRI0#PHI:1381#GzC2H044#5518#Fusarium_graminearum#unaffected_pathogenicity	66.275	0	590
g1383.t1	Q04701#PHI:179#PELA#140110#Nectria_haematococca#reduced_virulence	66.255	1.44e-107	312
g1692.t1	L2FHG9#PHI:3972#CDA#474922#Colletotrichum_gloeosporioides#unaffected_pathogenicity	66.238	6.97e-158	454
g6395.t1	Q4WJS6#PHI:6753#GlcA#746128#Aspergillus_fumigatus#lethal	66.221	6.66e-145	423
g5594.t1	G4MZ21#PHI:8649#Poalkb1_(MGG_01363)#318829#Magnaporthe_oryzae#reduced_virulence	66.197	5.02e-159	452
g2460.t1	G4NB53#PHI:5472#MoDeam#318829#Magnaporthe_oryzae#reduced_virulence	66.192	3.53e-131	396
g10537.t1	I1RR13#PHI:1709#GzZC024#5518#Fusarium_graminearum#unaffected_pathogenicity	66.068	0	733
g651.t1	I1RMT2#PHI:1940#GzZC255#5518#Fusarium_graminearum#unaffected_pathogenicity	66.048	0	700
g1968.t1	I1RLT3#PHI:7718#FgOXP2#5518#Fusarium_graminearum#reduced_virulence	66.033	0	1786
g7691.t1	I1RU73#PHI:5820#Fgsg07757#5518#Fusarium_graminearum#unaffected_pathogenicity	66.027	6.04e-172	487
g9752.t1	E3QRA4#PHI:2920#FET3-1#31870#Colletotrichum_graminicola#reduced_virulence	65.997	0	828
g12254.t1	I1R9P8#PHI:5797#Fgsg00201#5518#Fusarium_graminearum#unaffected_pathogenicity	65.995	6.52e-177	502
g10116.t1	Q4X146#PHI:2515#ALG7#746128#Aspergillus_fumigatus#lethal	65.875	0	651
g7479.t1	Q4WJ71#PHI:2539#CDS1#746128#Aspergillus_fumigatus#lethal	65.859	0	605
g3603.t1	G4MUG1#PHI:8039__PHI:8046#Moaos1__Aos1#318829#Magnaporthe_oryzae#reduced_virulence	65.854	2.11e-170	494
g5988.t1	I1RPX8#PHI:1581#GzOB021#5518#Fusarium_graminearum#unaffected_pathogenicity	65.789	1.08e-133	382
g3389.t1	A0A1C3YJ97#PHI:5796#Fgsg02569#5518#Fusarium_graminearum#unaffected_pathogenicity	65.782	6.83e-154	444
g9403.t1	I1RY71#PHI:1313#GzbHLH014#5518#Fusarium_graminearum#unaffected_pathogenicity	65.741	0	598
g4335.t1	Q5AND9#PHI:7009#arf2#5476#Candida_albicans#reduced_virulence	65.73	1.53e-88	260
g3361.t1	I1RBL8#PHI:1631#GzWing003#5518#Fusarium_graminearum#unaffected_pathogenicity	65.696	0	936
g5040.t1	I1RK94#PHI:1367#GzC2H028#5518#Fusarium_graminearum#unaffected_pathogenicity	65.686	0	715
g9336.t1	Q4WGN8#PHI:8590#met8_(AFUA_7G05680)#746128#Aspergillus_fumigatus#reduced_virulence__unaffected_pathogenicity	65.665	4.24e-111	323
g12691.t1	I1REA6#PHI:5822#Fgsg01989#5518#Fusarium_graminearum#unaffected_pathogenicity	65.641	0	524
g5032.t1	A0A290WI18#PHI:7706#VEDA_05196#27337#Verticillium_dahliae#reduced_virulence__unaffected_pathogenicity__increased_virulence_(hypervirulence)	65.638	0	686
g11313.t1	Q0UA24#PHI:2256#Xdh1#13684#Parastagonospora_nodorum#unaffected_pathogenicity	65.616	3.25e-171	484
g9744.t1	I1REQ5#PHI:1711#GzZC026#5518#Fusarium_graminearum#unaffected_pathogenicity	65.517	2.13e-171	500
g1868.t1	G4N8Y3#PHI:3213#MoCDIP1#318829#Magnaporthe_oryzae#effector_(plant_avirulence_determinant)	65.449	3.64e-159	453
g12432.t1	I1S006#PHI:1650#GzWing022#5518#Fusarium_graminearum#lethal	65.437	0	808
g4495.t1	I1RZI7#PHI:1334#GzbZIP016#5518#Fusarium_graminearum#reduced_virulence	65.398	2.67e-93	281
g140.t1	I1RMP5#PHI:5806#Fgsg05239#5518#Fusarium_graminearum#unaffected_pathogenicity	65.385	0	608
g6809.t1	I1S7A6#PHI:1846#GzZC161#5518#Fusarium_graminearum#unaffected_pathogenicity	65.374	1.21e-164	501
g7818.t1	I1RX94#PHI:1164#RRG1__SSK1#5518#Fusarium_graminearum#reduced_virulence	65.333	0	715
g4815.t1	I1RHZ6#PHI:1887#GzZC202#5518#Fusarium_graminearum#unaffected_pathogenicity	65.309	0	910
g6132.t1	I1RHZ0#PHI:5836#Fgsg03409#5518#Fusarium_graminearum#unaffected_pathogenicity	65.301	1.08e-166	476
g12580.t1	A0A290WFK0#PHI:7709#VEDA_05199#27337#Verticillium_dahliae#reduced_virulence__unaffected_pathogenicity	65.285	0	548
g6727.t1	O59939#PHI:222#PELB#474922#Colletotrichum_gloeosporioides#reduced_virulence	65.232	7.23e-119	349
g7278.t1	I1RTN5#PHI:1549__PHI:2385#MYT2#5518#Fusarium_graminearum#unaffected_pathogenicity__reduced_virulence	65.217	2.75e-36	128
g2214.t1	Q4WK03#PHI:2544#PAB1#746128#Aspergillus_fumigatus#lethal	65.212	0	840
g3726.t1	G4MKY1#PHI:7991#PoVps9_(MGG_05379)__PoVps9#318829#Magnaporthe_oryzae#reduced_virulence__loss_of_pathogenicity	65.052	0	808
g9594.t1	O94196#PHI:458#MHP1#318829#Magnaporthe_oryzae#reduced_virulence	65	5.7e-39	127
g9648.t1	G4MUW5#PHI:888#MGG_01707#318829#Magnaporthe_oryzae#reduced_virulence	64.982	5.73e-129	371
g7224.t1	I1RS37#PHI:1643#GzWing015#5518#Fusarium_graminearum#reduced_virulence	64.948	0	930
g12545.t1	Q4P245#PHI:2239#Spe-Sdh#5270#Ustilago_maydis#reduced_virulence	64.948	3.23e-137	409
g12698.t1	O59939#PHI:222#PELB#474922#Colletotrichum_gloeosporioides#reduced_virulence	64.935	4.07e-126	367
g8079.t1	G4MZ47#PHI:2105#Calcium_permease#318829#Magnaporthe_oryzae#unaffected_pathogenicity__reduced_virulence	64.909	0	1379
g6080.t1	I1RE63#PHI:743#ARG2#5518#Fusarium_graminearum#reduced_virulence	64.889	0	833
g2015.t1	I1RLS0#PHI:1957#GzZC272#5518#Fusarium_graminearum#unaffected_pathogenicity	64.868	0	1198
g10686.t1	I1RJE6#PHI:5790#Fgsg03962#5518#Fusarium_graminearum#unaffected_pathogenicity	64.833	0	538
g2578.t1	Q4WYU7#PHI:2528#SLY1#746128#Aspergillus_fumigatus#lethal	64.763	0	935
g8024.t1	A0A1C3YKY7#PHI:5818#Fgsg07136#5518#Fusarium_graminearum#unaffected_pathogenicity	64.748	0	546
g7638.t1	P53376#PHI:823#beta-tubulin#914237#Rhynchosporium_commune#chemistry_target:_resistance_to_chemical	64.744	2.98e-57	191
g4113.t1	O93841#PHI:243#CHIP6#474922#Colletotrichum_gloeosporioides#reduced_virulence	64.642	0	1201
g11310.t1	G4MNA5#PHI:2096#Calcium-transporting_ATPase_3#318829#Magnaporthe_oryzae#loss_of_pathogenicity	64.628	0	1412
g6864.t1	I1RQG9#PHI:1378#GzC2H041#5518#Fusarium_graminearum#unaffected_pathogenicity	64.627	0	912
g340.t1	J4KLZ9#PHI:7155#pmr1#176275#Beauveria_bassiana#reduced_virulence	64.612	0	576
g6350.t1	G4N549#PHI:7273#Pmp1#318829#Magnaporthe_oryzae#reduced_virulence__unaffected_pathogenicity	64.58	0	691
g11523.t1	I1RC69#PHI:1934#GzZC249#5518#Fusarium_graminearum#unaffected_pathogenicity	64.531	0	609
g9380.t1	I1RNA7#PHI:1507#GzHOME002#5518#Fusarium_graminearum#unaffected_pathogenicity	64.494	0	542
g8326.t1	A4QTE3#PHI:8927#MoSCAD1_(MGG_05096)#318829#Magnaporthe_oryzae#reduced_virulence__loss_of_pathogenicity	64.478	1.02e-152	436
g11919.t1	J5JIF8#PHI:7153#pmcC#176275#Beauveria_bassiana#reduced_virulence	64.472	0	1370
g8819.t1	G4MNK1#PHI:5470#MoNgt1#318829#Magnaporthe_oryzae#reduced_virulence	64.426	3.94e-152	440
g4705.t1	I1RE42#PHI:1541#GzFlbD#5518#Fusarium_graminearum#unaffected_pathogenicity	64.394	2.59e-94	286
g6303.t1	Q0V515#PHI:3914#Sdh1#13684#Parastagonospora_nodorum#reduced_virulence	64.389	0	634
g11226.t1	Q4WCZ1#PHI:2969#argEF#746128#Aspergillus_fumigatus#reduced_virulence	64.364	0	1162
g4542.t1	G4MMH7#PHI:2115__PHI:4494#Annexin_A7__AnnA7#318829#Magnaporthe_oryzae#loss_of_pathogenicity__reduced_virulence	64.286	1e-150	443
g10062.t1	G4NCG1#PHI:3234#MoLYS20#318829#Magnaporthe_oryzae#reduced_virulence	64.247	6.98e-159	469
g5034.t1	I1RIV2#PHI:1007#NPS6#5518#Fusarium_graminearum#reduced_virulence	64.111	0	2774
g12297.t1	I1S018#PHI:1689#GzZC004#5518#Fusarium_graminearum#unaffected_pathogenicity	64.088	0	1093
g10341.t1	I1RM19#PHI:3036#FgERG3B#5518#Fusarium_graminearum#reduced_virulence	64.087	2.45e-147	420
g11220.t1	E3QNW8#PHI:6228#KRE6#31870#Colletotrichum_graminicola#reduced_virulence	64.052	0	621
g11831.t1	I1S8E5#PHI:1433#GzC2H102#5518#Fusarium_graminearum#unaffected_pathogenicity	63.964	4.16e-145	421
g4881.t1	I1RKY2#PHI:1578#GzOB018#5518#Fusarium_graminearum#unaffected_pathogenicity	63.937	0	699
g11184.t1	E3QHX9#PHI:6227#KRE5#31870#Colletotrichum_graminicola#reduced_virulence	63.909	0	1986
g10192.t1	G4NCS2#PHI:6780#MoCreC#318829#Magnaporthe_oryzae#reduced_virulence	63.908	0	725
g12208.t1	J9N5P9#PHI:3168#SGE1#5507#Fusarium_oxysporum#reduced_virulence	63.839	1.67e-92	286
g6195.t1	A9QUB2#PHI:2403#CSN1#169388#Fusarium_solani#increased_virulence_(hypervirulence)__reduced_virulence	63.816	3.33e-131	378
g12025.t1	O59928#PHI:144#CHT42#29875#Trichoderma_virens#reduced_virulence	63.805	0	560
g9351.t1	G5EI34#PHI:3019#MoLys2#318829#Magnaporthe_oryzae#reduced_virulence	63.784	0	1587
g3245.t1	Q4X1I3#PHI:2545#TIF35#746128#Aspergillus_fumigatus#lethal	63.763	5.37e-124	359
g1327.t1	F9XQ56#PHI:2442#MgNLP#1047171#Zymoseptoria_tritici#unaffected_pathogenicity	63.721	1.16e-97	288
g9818.t1	I1REJ1#PHI:1662#GzCCHC002#5518#Fusarium_graminearum#unaffected_pathogenicity	63.718	0	682
g7523.t1	Q4W9S1#PHI:6557#cysB#746128#Aspergillus_fumigatus#unaffected_pathogenicity__reduced_virulence	63.636	0	638
g12638.t1	G4NHC2#PHI:5034#MoADH1#318829#Magnaporthe_oryzae#unaffected_pathogenicity	63.61	1.52e-159	454
g7115.t1	I1RSX8#PHI:1795#GzZC110#5518#Fusarium_graminearum#unaffected_pathogenicity	63.591	0	775
g9775.t1	I1S2C4#PHI:5068#MCC#5518#Fusarium_graminearum#reduced_virulence	63.587	0	2433
g255.t1	G4MRZ9#PHI:2181#MoDUO1#318829#Magnaporthe_oryzae#reduced_virulence	63.551	3.95e-41	142
g3534.t1	I1RWS0#PHI:1592#GzOB032#5518#Fusarium_graminearum#unaffected_pathogenicity	63.478	2.08e-150	430
g9693.t1	Q7Z8E9#PHI:518#MST20#318829#Magnaporthe_oryzae#unaffected_pathogenicity	63.402	0	1004
g9923.t1	G4NA54#PHI:2214#endo-1_4-beta-xylanase_I_[GH10_family]#318829#Magnaporthe_oryzae#reduced_virulence	63.402	3.51e-90	270
g7798.t1	I1RZY2#PHI:1556#GzNH001#5518#Fusarium_graminearum#reduced_virulence	63.317	4.29e-70	231
g6569.t1	A5H456#PHI:867__PHI:1159#MgAtr7#1047171#Zymoseptoria_tritici#unaffected_pathogenicity__chemistry_target:_sensitivity_to_chemical	63.291	9.39e-130	415
g9153.t1	Q96TN6#PHI:256#GAS1#318829#Magnaporthe_oryzae#reduced_virulence	63.235	8.1e-86	258
g11338.t1	G4NCG1#PHI:3234#MoLYS20#318829#Magnaporthe_oryzae#reduced_virulence	63.202	2.18e-162	468
g4562.t1	G4NCG1#PHI:3234#MoLYS20#318829#Magnaporthe_oryzae#reduced_virulence	63.158	1.34e-42	147
g12277.t1	P43098#PHI:96#FAS2#5476#Candida_albicans#loss_of_pathogenicity	63.144	0	2428
g11099.t1	I1RSF8#PHI:1682#GzNF002#5518#Fusarium_graminearum#unaffected_pathogenicity	63.125	0	759
g7404.t1	B3GXB6#PHI:7075#pdxS#715#Actinobacillus_pleuropneumoniae#reduced_virulence	63.103	1.49e-125	364
g12029.t1	F9XNZ8#PHI:8592#ZtPpt#1047171#Zymoseptoria_tritici#loss_of_pathogenicity	63.043	2.45e-133	392
g4726.t1	O59937#PHI:569#XYL3#5507#Fusarium_oxysporum#unaffected_pathogenicity	63.043	6.39e-13	68.9
g906.t1	I1RL06#PHI:3697__PHI:3925#FgABC1__FgABC3#5518#Fusarium_graminearum#reduced_virulence	63.015	0	1948
g1160.t1	G4N740#PHI:4024#MoST1#318829#Magnaporthe_oryzae#unaffected_pathogenicity	62.957	0	715
g966.t1	I1RX22#PHI:1595#GzOB035#5518#Fusarium_graminearum#unaffected_pathogenicity	62.872	0	726
g6896.t1	G4MRB4#PHI:4491#SHM#318829#Magnaporthe_oryzae#reduced_virulence	62.863	0	619
g10453.t1	Q4HTT1#PHI:1468#GzCCAAT008#5518#Fusarium_graminearum#unaffected_pathogenicity	62.857	1.59e-35	121
g11332.t1	Q522W5#PHI:2086#Moatg24#318829#Magnaporthe_oryzae#unaffected_pathogenicity	62.828	0	610
g1833.t1	I1SAX2#PHI:1864#GzZC179#5518#Fusarium_graminearum#unaffected_pathogenicity	62.808	0	655
g6954.t1	N4W395#PHI:5040#BFA1#5465#Colletotrichum_orbiculare#reduced_virulence	62.694	0	1081
g8564.t1	G2X6V8#PHI:6331#VdCYP1#27337#Verticillium_dahliae#loss_of_pathogenicity	62.68	0	656
g6928.t1	I1RQC1#PHI:1310#GzbHLH011#5518#Fusarium_graminearum#unaffected_pathogenicity	62.676	6.92e-168	493
g3542.t1	G4NCW8#PHI:2101#MGG_11454.5#318829#Magnaporthe_oryzae#unaffected_pathogenicity	62.554	0	524
g11758.t1	I1S0G0#PHI:1617#GzssDB002#5518#Fusarium_graminearum#unaffected_pathogenicity	62.5	2.5e-51	163
g1820.t1	I1RJ54#PHI:1885#GzZC200#5518#Fusarium_graminearum#unaffected_pathogenicity	62.379	0	528
g4465.t1	A0A0C4DHY2#PHI:4879#pg1#5507#Fusarium_oxysporum#unaffected_pathogenicity__reduced_virulence	62.36	3.01e-156	452
g7018.t1	Q4WC58#PHI:3050#CHSF#746128#Aspergillus_fumigatus#reduced_virulence	62.337	0	1486
g7833.t1	I1RX79#PHI:1770#GzZC085#5518#Fusarium_graminearum#unaffected_pathogenicity	62.295	0	667
g6572.t1	I1RVB5#PHI:1801#GzZC116#5518#Fusarium_graminearum#reduced_virulence	62.282	2.36e-179	519
g2775.t1	A0A0C4DHY4#PHI:4880#pgx6#5507#Fusarium_oxysporum#unaffected_pathogenicity__reduced_virulence	62.281	0	612
g3408.t1	I1RFR2#PHI:1089#FGSG_02549#5518#Fusarium_graminearum#reduced_virulence	62.257	1.21e-116	348
g9960.t1	I1RGC8#PHI:1838#GzZC153#5518#Fusarium_graminearum#unaffected_pathogenicity	62.222	0	795
g12741.t1	I1RD28#PHI:1876#GzZC191#5518#Fusarium_graminearum#unaffected_pathogenicity	62.134	0	743
g12097.t1	I1RIL1#PHI:1835#GzZC150#5518#Fusarium_graminearum#unaffected_pathogenicity	62.119	0	784
g11789.t1	Q525E4#PHI:2073__PHI:2091#Moatg5__MgATG5#318829#Magnaporthe_oryzae#loss_of_pathogenicity	62.109	1.45e-99	311
g5152.t1	I1RNU2#PHI:1895#GzZC210#5518#Fusarium_graminearum#unaffected_pathogenicity	62.062	0	578
g9182.t1	I1RWG5#PHI:1448__PHI:2430#GzGATA006__areA#5518#Fusarium_graminearum#unaffected_pathogenicity__reduced_virulence	62.025	1.35e-26	102
g10966.t1	G4N5E4#PHI:2060#MgLig4#318829#Magnaporthe_oryzae#unaffected_pathogenicity	62.014	0	1223
g5568.t1	A0A016PUA3#PHI:3659#NPS1#5518#Fusarium_graminearum#unaffected_pathogenicity__reduced_virulence	62.009	0	5940
g2244.t1	G4NCA2#PHI:2016#PTH2#318829#Magnaporthe_oryzae#loss_of_pathogenicity	61.966	1.11e-85	256
g6750.t1	I1S674#PHI:1337#GzbZIP019#5518#Fusarium_graminearum#unaffected_pathogenicity	61.925	0	580
g2583.t1	I1S0W0#PHI:1417#GzC2H084#5518#Fusarium_graminearum#unaffected_pathogenicity	61.925	2.5e-94	279
g10041.t1	I1S8Y5#PHI:1434#GzC2H103#5518#Fusarium_graminearum#unaffected_pathogenicity	61.916	3.41e-155	449
g4419.t1	G4N2X9#PHI:5189#MoLDS1#318829#Magnaporthe_oryzae#reduced_virulence	61.875	0	1429
g722.t1	Q6WER3#PHI:432__PHI:4212__PHI:4242#FGL1__Fgl1#5518#Fusarium_graminearum#reduced_virulence	61.862	5.4e-145	416
g9031.t1	B0LFQ7#PHI:3523#Bx-Prx#6326#Bursaphelenchus_xylophilus#loss_of_pathogenicity	61.856	7.24e-87	258
g10371.t1	I1RM58#PHI:5851#Fgsg05039#5518#Fusarium_graminearum#unaffected_pathogenicity	61.848	3.77e-180	511
g5791.t1	I1RZF2#PHI:1524#GzHOMEL033#5518#Fusarium_graminearum#unaffected_pathogenicity	61.804	0	617
g6879.t1	I1RQI0#PHI:1975#GzZC290#5518#Fusarium_graminearum#unaffected_pathogenicity	61.746	0	573
g7549.t1	I1RQ89#PHI:1641__PHI:2434#FgFlbA#5518#Fusarium_graminearum#reduced_virulence	61.688	0	571
g10230.t1	I1RYG0#PHI:1410#GzC2H076#5518#Fusarium_graminearum#unaffected_pathogenicity	61.671	3.49e-119	349
g4885.t1	I1RWM5#PHI:1184__PHI:6974#(Sc_Gin4-like)__gil1#5518#Fusarium_graminearum#reduced_virulence	61.667	0	1040
g557.t1	Q6FPV9#PHI:2559#Slt2#5478#Candida_glabrata#reduced_virulence__increased_virulence_(hypervirulence)	61.596	4.05e-179	512
g6200.t1	A0A0D2YD74#PHI:5483#FTF1#5507#Fusarium_oxysporum#reduced_virulence	61.582	4.71e-64	221
g1049.t1	I1RNM1#PHI:1486#GzHMG018#5518#Fusarium_graminearum#unaffected_pathogenicity	61.576	4.53e-110	331
g12245.t1	I1RIR0#PHI:1928#GzZC243#5518#Fusarium_graminearum#unaffected_pathogenicity	61.569	0	608
g892.t1	Q9C4A0#PHI:2817#Aapg1#5599#Alternaria_alternata#unaffected_pathogenicity	61.561	5.83e-138	401
g6199.t1	I1REJ1#PHI:1662#GzCCHC002#5518#Fusarium_graminearum#unaffected_pathogenicity	61.475	0	608
g12927.t1	G4MPB7#PHI:4495#Bud6p#318829#Magnaporthe_oryzae#unaffected_pathogenicity	61.471	0	1127
g6441.t1	I1RAZ9#PHI:1472#GzHMG004#5518#Fusarium_graminearum#unaffected_pathogenicity	61.452	0	714
g7153.t1	I1R9P3#PHI:1995#GzZC310#5518#Fusarium_graminearum#unaffected_pathogenicity	61.442	3.32e-136	405
g6525.t1	Q9C1C6#PHI:216#HDC1#5017#Bipolaris_zeicola#reduced_virulence	61.436	0	714
g12631.t1	Q5KAG0#PHI:4197#LHC1#5207#Cryptococcus_neoformans#reduced_virulence	61.417	2.17e-167	481
g11507.t1	I1RC79#PHI:1462#GzCCAAT002#5518#Fusarium_graminearum#reduced_virulence	61.379	2.56e-88	268
g11629.t1	I1RVS7#PHI:1792#GzZC107#5518#Fusarium_graminearum#unaffected_pathogenicity	61.356	0	776
g4527.t1	H8ZZ79#PHI:2710#mepB#474922#Colletotrichum_gloeosporioides#reduced_virulence	61.33	0	527
g4849.t1	G4NJL1#PHI:2027#TGL1-1#318829#Magnaporthe_oryzae#unaffected_pathogenicity	61.275	0	738
g10082.t1	A0A0G4J7R2#PHI:7735#PbCYP3#318829#Magnaporthe_oryzae#reduced_virulence	61.272	2.57e-66	202
g4900.t1	I1RN12#PHI:1937#GzZC252#5518#Fusarium_graminearum#unaffected_pathogenicity	61.245	0	902
g10465.t1	G4MNH3#PHI:5635#FZC40#318829#Magnaporthe_oryzae#unaffected_pathogenicity	61.233	1.14e-169	520
g7228.t1	I1RS33#PHI:1250#FGSG_06940#5518#Fusarium_graminearum#unaffected_pathogenicity	61.212	0	779
g877.t1	I1RXE8#PHI:1763#GzZC078#5518#Fusarium_graminearum#unaffected_pathogenicity	61.183	0	863
g12877.t1	Q9C1I7#PHI:310#MgAtr4#1047171#Zymoseptoria_tritici#reduced_virulence	61.178	0	1847
g12838.t1	I1RVN8#PHI:1791#GzZC106#5518#Fusarium_graminearum#unaffected_pathogenicity	61.148	0	536
g3710.t1	Q0V515#PHI:3914#Sdh1#13684#Parastagonospora_nodorum#reduced_virulence	61.145	0	595
g759.t1	Q00350#PHI:572#XYL2#5017#Bipolaris_zeicola#unaffected_pathogenicity	61.135	2.43e-96	283
g4942.t1	G2X5W3#PHI:8559#SOM1_(VDAG_JR2_Chr1g09120a)#27337#Verticillium_dahliae#loss_of_pathogenicity__reduced_virulence	61.086	0	764
g663.t1	M1W4B7#PHI:6266#cptRNA-ipt#5111#Claviceps_purpurea#reduced_virulence__loss_of_pathogenicity	61.028	0	580
g3592.t1	I1RNH0#PHI:1265#FGSG_05549#5518#Fusarium_graminearum#unaffected_pathogenicity	61.006	1.18e-136	408
g2355.t1	G4ND53#PHI:4084#MoPex19#318829#Magnaporthe_oryzae#loss_of_pathogenicity	60.993	3.41e-89	280
g7566.t1	Q523C3#PHI:2072#Moatg4#318829#Magnaporthe_oryzae#loss_of_pathogenicity	60.941	0	583
g1619.t1	G4MZD0#PHI:3060__PHI:4054#Molrg1__Lrg1#318829#Magnaporthe_oryzae#loss_of_pathogenicity	60.926	0	1400
g11326.t1	Q70ZY8#PHI:2524#nudC#746128#Aspergillus_fumigatus#lethal	60.894	1.26e-74	226
g1656.t1	Q4WLT4#PHI:2533#FKS1#746128#Aspergillus_fumigatus#lethal	60.861	0	2337
g1041.t1	G4NBI7#PHI:2028#TGL1-2#318829#Magnaporthe_oryzae#unaffected_pathogenicity	60.841	0	929
g6897.t1	G2XAE9#PHI:5387#VdCYC8#27337#Verticillium_dahliae#reduced_virulence	60.831	0	908
g7198.t1	I1S2F6#PHI:1460#GzAra008#5518#Fusarium_graminearum#unaffected_pathogenicity	60.828	3.31e-134	387
g11852.t1	Q4IB96#PHI:1546#GzMyb010#5518#Fusarium_graminearum#lethal	60.796	0	1593
g6234.t1	G4N704#PHI:7992#PoMuk1_(MGG_06476)__PoMuk1#318829#Magnaporthe_oryzae#unaffected_pathogenicity__loss_of_pathogenicity	60.782	0	783
g8609.t1	W5ZQ93#PHI:3417#Ohmm#176275#Beauveria_bassiana#increased_virulence_(hypervirulence)	60.751	0	1184
g3297.t1	I1RQ27#PHI:1914#GzZC229#5518#Fusarium_graminearum#unaffected_pathogenicity	60.726	0	1060
g4719.t1	I1RCQ4#PHI:1919#GzZC234#5518#Fusarium_graminearum#unaffected_pathogenicity	60.714	0	1111
g3162.t1	I1RW28#PHI:1646#GzWing018#5518#Fusarium_graminearum#reduced_virulence	60.687	0	1029
g3540.t1	I1RWS6#PHI:1593#GzOB033#5518#Fusarium_graminearum#unaffected_pathogenicity	60.687	7.68e-105	308
g7248.t1	Q5AMP3#PHI:7011#arl1#5476#Candida_albicans#reduced_virulence	60.656	1.68e-74	224
g7788.t1	G4N8A1#PHI:2087#Moatg26#318829#Magnaporthe_oryzae#unaffected_pathogenicity	60.634	0	1730
g208.t1	I1RWH6#PHI:1404#GzC2H067#5518#Fusarium_graminearum#unaffected_pathogenicity	60.625	0	653
g5011.t1	J9VKY2#PHI:6605#HVA1#5207#Cryptococcus_neoformans#increased_virulence_(hypervirulence)	60.606	9.71e-22	81.6
g12602.t1	I1RAQ0#PHI:1344#GzC2H004#5518#Fusarium_graminearum#unaffected_pathogenicity	60.565	0	1300
g10516.t1	A0A177DU44#PHI:8000#csn5#5599#Alternaria_alternata#reduced_virulence	60.534	8.18e-151	432
g3092.t1	G4NII5#PHI:2094#Yvc1#318829#Magnaporthe_oryzae#reduced_virulence__loss_of_pathogenicity	60.45	0	752
g2771.t1	Q5KAG0#PHI:4197#LHC1#5207#Cryptococcus_neoformans#reduced_virulence	60.428	3.67e-168	485
g5816.t1	I1RD01#PHI:1479#GzHMG011#5518#Fusarium_graminearum#unaffected_pathogenicity	60.339	0	1199
g6194.t1	G8AA67#PHI:2476#CcpelA#27358#Colletotrichum_coccodes#reduced_virulence__increased_virulence_(hypervirulence)	60.339	3.42e-118	347
g11940.t1	I1RNQ2#PHI:1170__PHI:1174#HDF3#5518#Fusarium_graminearum#unaffected_pathogenicity__reduced_virulence	60.327	0	1237
g3084.t1	Q0UHM8#PHI:2257#Pbl1#13684#Parastagonospora_nodorum#unaffected_pathogenicity	60.299	4.22e-122	361
g8583.t1	I1RZ96#PHI:1751#GzZC066#5518#Fusarium_graminearum#unaffected_pathogenicity	60.269	8.56e-99	305
g9813.t1	I1REI8#PHI:1093#FGSG_02077#5518#Fusarium_graminearum#reduced_virulence	60.241	8.43e-26	99.4
g6797.t1	G2X8Y4#PHI:7741#FreB#27337#Verticillium_dahliae#reduced_virulence	60.239	0	729
g2586.t1	A0A0G4J7R2#PHI:7735#PbCYP3#318829#Magnaporthe_oryzae#reduced_virulence	60.234	1.1e-66	211
g1028.t1	I1RCX3#PHI:1540#GzMyb004#5518#Fusarium_graminearum#unaffected_pathogenicity	60.212	0	938
g12396.t1	I1RVR1#PHI:1860#GzZC175#5518#Fusarium_graminearum#unaffected_pathogenicity	60.159	0	711
g5556.t1	Q6Y392#PHI:1085#Ptr2#13684#Parastagonospora_nodorum#unaffected_pathogenicity	60.146	0	692
g11918.t1	I1RHF1#PHI:1912#GzZC227#5518#Fusarium_graminearum#unaffected_pathogenicity	60.135	0	688
g2084.t1	I1S3Z9#PHI:1774#GzZC089#5518#Fusarium_graminearum#lethal	60.123	0	765
g9884.t1	Q4R1B9#PHI:2065#MSTU1#318829#Magnaporthe_oryzae#loss_of_pathogenicity	60.123	0	609
g1481.t1	I1S487#PHI:1750#GzZC065#5518#Fusarium_graminearum#unaffected_pathogenicity	60.101	7.5e-70	232
g12107.t1	G4MTK2#PHI:5232#MoARG1#318829#Magnaporthe_oryzae#loss_of_pathogenicity	60.097	2.07e-177	503
g3748.t1	I1RS06#PHI:1665#GzCCHC005#5518#Fusarium_graminearum#unaffected_pathogenicity	60.073	1.22e-87	264
g11867.t1	I1RNC6#PHI:1465#GzCCAAT005#5518#Fusarium_graminearum#unaffected_pathogenicity	60.058	3.13e-93	283
g12201.t1	G4MV40#PHI:6395#MoALR2#318829#Magnaporthe_oryzae#reduced_virulence	60.032	0	747
g1173.t1	I1RYA7#PHI:1693#GzZC008#5518#Fusarium_graminearum#unaffected_pathogenicity	60	0	692
g8408.t1	I1S0H5#PHI:7717#FgOXP1#5518#Fusarium_graminearum#reduced_virulence	60	3.84e-30	115
g10467.t1	Q4WJ77#PHI:7654#aroB#746128#Aspergillus_fumigatus#reduced_virulence	60	2.08e-17	75.5
g6746.t1	Q9P4V0#PHI:2831#AKTR-1#5599#Alternaria_alternata#loss_of_pathogenicity	60	4.85e-14	72.4
g631.t1	M1RXP4#PHI:4165#ALG3#318829#Magnaporthe_oryzae#reduced_virulence	59.953	0	527
g146.t1	I1RMP0#PHI:1485#GzHMG017#5518#Fusarium_graminearum#unaffected_pathogenicity	59.934	0	946
g2782.t1	I1RWY8#PHI:1821#GzZC136#5518#Fusarium_graminearum#unaffected_pathogenicity	59.894	5.77e-154	460
g6417.t1	G4N6Q1#PHI:2074#Moatg6#318829#Magnaporthe_oryzae#loss_of_pathogenicity	59.881	0	594
g3148.t1	G4NL37#PHI:893#MGG_02986#318829#Magnaporthe_oryzae#reduced_virulence	59.832	0	2031
g5094.t1	Q4WR83#PHI:2321#SidI#746128#Aspergillus_fumigatus#reduced_virulence	59.79	0	722
g11014.t1	I1RD69#PHI:1620#GzJUM002#5518#Fusarium_graminearum#unaffected_pathogenicity	59.781	0	1612
g3254.t1	I1RM88#PHI:1450#GzGATA008#5518#Fusarium_graminearum#lethal	59.761	5.55e-71	231
g1674.t1	Q00845#PHI:180#PELD#140110#Nectria_haematococca#reduced_virulence	59.74	1.34e-91	272
g6844.t1	Q4WXC5#PHI:2531#PRI1#746128#Aspergillus_fumigatus#lethal	59.738	0	619
g8418.t1	Q9C1I7#PHI:310#MgAtr4#1047171#Zymoseptoria_tritici#reduced_virulence	59.717	0	1805
g4837.t1	Q0R411#PHI:6417#Sm1#29875#Trichoderma_virens#reduced_virulence	59.712	2.66e-55	172
g4969.t1	I1RV74#PHI:1399#GzC2H062#5518#Fusarium_graminearum#unaffected_pathogenicity	59.644	0	790
g10406.t1	T2C7K6#PHI:3226#pnl1#36651#Penicillium_digitatum#reduced_virulence	59.581	6.81e-132	385
g4902.t1	A0A016PW58#PHI:3658#NPS2#5518#Fusarium_graminearum#unaffected_pathogenicity__reduced_virulence	59.559	0	5960
g1735.t1	I1RGG4#PHI:1713#GzZC028#5518#Fusarium_graminearum#unaffected_pathogenicity	59.559	6.2e-52	182
g8844.t1	G2YTS7#PHI:7722#BcDGAT2#40559#Botrytis_cinerea#reduced_virulence	59.557	6.45e-159	464
g4050.t1	Q6WIH5#PHI:4970#MEP1#523103#Trichophyton_mentagrophytes#reduced_virulence	59.551	0	767
g1555.t1	G4N1N6#PHI:5191#TPX1#318829#Magnaporthe_oryzae#reduced_virulence	59.551	4.3e-69	218
g7980.t1	L2FHG9#PHI:3972#CDA#474922#Colletotrichum_gloeosporioides#unaffected_pathogenicity	59.512	2.98e-173	495
g12139.t1	Q96VL3#PHI:339#CLPT1#290576#Colletotrichum_lindemuthianum#reduced_virulence	59.5	3.2e-82	252
g9666.t1	I1RYK8#PHI:1847#GzZC162#5518#Fusarium_graminearum#unaffected_pathogenicity	59.485	1e-178	530
g5953.t1	I1RXS2#PHI:1759#GzZC074#5518#Fusarium_graminearum#unaffected_pathogenicity	59.477	0	718
g10469.t1	G2XBR1#PHI:3708#VdSSP1#27337#Verticillium_dahliae#reduced_virulence	59.472	0	1229
g4211.t1	Q4I0C5#PHI:1764#GzZC079#5518#Fusarium_graminearum#unaffected_pathogenicity	59.42	0	692
g6484.t1	A0A095EN78#PHI:4555#URE1#552467#Cryptococcus_gattii_vgiii#reduced_virulence	59.405	0	1016
g7779.t1	I1RUH0#PHI:1330#GzbZIP012#5518#Fusarium_graminearum#unaffected_pathogenicity	59.375	1.26e-22	93.2
g6334.t1	W7N2B4#PHI:3381#FVEG_12533#117187#Fusarium_verticillioides#unaffected_pathogenicity	59.325	0	645
g5810.t1	I1RD24#PHI:5091#FgRic8#5518#Fusarium_graminearum#reduced_virulence	59.315	0	526
g3465.t1	G4NIP8#PHI:2104#MGG_04159.5#318829#Magnaporthe_oryzae#unaffected_pathogenicity	59.278	0	625
g3467.t1	I1RZC6#PHI:1088#FGSG_09759#5518#Fusarium_graminearum#unaffected_pathogenicity	59.122	6.91e-149	432
g10511.t1	Q4WUL6#PHI:362__PHI:2520#LYSF__LYS4#746128#Aspergillus_fumigatus#loss_of_pathogenicity__lethal	59.104	0	855
g582.t1	I1RK21#PHI:1559#GzNEG001#5518#Fusarium_graminearum#unaffected_pathogenicity	59.073	1.57e-111	325
g8897.t1	I1RA77#PHI:1986#GzZC301#5518#Fusarium_graminearum#unaffected_pathogenicity	59.003	0	855
g4675.t1	A0A0D2XJY4#PHI:4723#gnn1#5507#Fusarium_oxysporum#unaffected_pathogenicity	58.939	0	897
g11133.t1	G4MQP9#PHI:2177#PAS1#318829#Magnaporthe_oryzae#unaffected_pathogenicity	58.884	0	1434
g11210.t1	I1RUL5#PHI:1395#GzC2H058#5518#Fusarium_graminearum#unaffected_pathogenicity	58.873	0	549
g884.t1	I1RFB5#PHI:1970#GzZC285#5518#Fusarium_graminearum#unaffected_pathogenicity	58.824	0	536
g3124.t1	M7TSY2#PHI:7975#Nop53#40559#Botrytis_cinerea#reduced_virulence	58.824	8.27e-157	454
g2344.t1	Q5A5P7#PHI:4891#orf19.5352#5476#Candida_albicans#unaffected_pathogenicity	58.747	1.48e-142	420
g7603.t1	G4N1A3#PHI:2167#EXP5#318829#Magnaporthe_oryzae#reduced_virulence	58.746	0	1547
g1358.t1	G4MKP6#PHI:3161#Mohik5#318829#Magnaporthe_oryzae#loss_of_pathogenicity	58.742	0	2068
g8830.t1	I1RCN9#PHI:2427#FgVELB#5518#Fusarium_graminearum#reduced_virulence	58.734	3.68e-134	400
g4046.t1	I1RCE1#PHI:1568#GzOB008#5518#Fusarium_graminearum#unaffected_pathogenicity	58.724	0	1214
g8879.t1	G4N7U7#PHI:8629#MoAbp1_(MGG_06358)#318829#Magnaporthe_oryzae#reduced_virulence	58.712	0	753
g5324.t1	I1RTP1#PHI:5785#Fgsg07554#5518#Fusarium_graminearum#unaffected_pathogenicity	58.703	1.73e-132	380
g1513.t1	A0A0E0S4Y7#PHI:8646#FgLDHL2_(FGSG_16220)#5518#Fusarium_graminearum#reduced_virulence	58.696	0	557
g1974.t1	A0A1W5T7B8#PHI:7243#pks15#176275#Beauveria_bassiana#reduced_virulence	58.671	0	2677
g2424.t1	I1RTH7#PHI:1890#GzZC205#5518#Fusarium_graminearum#unaffected_pathogenicity	58.643	0	716
g1304.t1	G5EI34#PHI:3019#MoLys2#318829#Magnaporthe_oryzae#reduced_virulence	58.586	8.89e-33	121
g2139.t1	I1RRH8#PHI:1892#GzZC207#5518#Fusarium_graminearum#unaffected_pathogenicity	58.555	0	902
g8062.t1	Q5XTQ4#PHI:541#LIP1#40559#Botrytis_cinerea#unaffected_pathogenicity	58.537	0	664
g10228.t1	I1RU53#PHI:1390#GzC2H053#5518#Fusarium_graminearum#unaffected_pathogenicity	58.523	1.43e-63	231
g6980.t1	I1RMG7#PHI:1954#GzZC269#5518#Fusarium_graminearum#unaffected_pathogenicity	58.503	0	847
g7016.t1	I1RCG0#PHI:1539#GzMyb003#5518#Fusarium_graminearum#unaffected_pathogenicity	58.491	5.63e-79	242
g9918.t1	Q4WJR9#PHI:6554#sB#746128#Aspergillus_fumigatus#unaffected_pathogenicity	58.471	0	884
g9732.t1	I1REN7#PHI:1681#GzNF001#5518#Fusarium_graminearum#unaffected_pathogenicity	58.462	0	2699
g3435.t1	G4NF65#PHI:3061__PHI:4055#MoRga1__Rga1#318829#Magnaporthe_oryzae#unaffected_pathogenicity	58.43	0	1233
g11026.t1	G4MQZ9#PHI:2025#HDL1#318829#Magnaporthe_oryzae#unaffected_pathogenicity	58.428	0	917
g7249.t1	O13289#PHI:106__PHI:7209#CAT1__cat1#5476#Candida_albicans#reduced_virulence__unaffected_pathogenicity	58.333	0	575
g3100.t1	I1RJY6#PHI:1707#GzZC022#5518#Fusarium_graminearum#unaffected_pathogenicity	58.313	0	914
g4817.t1	T2C913#PHI:3225#Ndo1#36651#Penicillium_digitatum#unaffected_pathogenicity	58.313	0	516
g1490.t1	P32964#PHI:143#CHT#5563#Gloeocercospora_sorghi#unaffected_pathogenicity	58.286	6.28e-142	410
g8582.t1	I1RZ96#PHI:1751#GzZC066#5518#Fusarium_graminearum#unaffected_pathogenicity	58.252	3.72e-53	180
g5121.t1	G4NCI6#PHI:6612#Mocapn9#318829#Magnaporthe_oryzae#unaffected_pathogenicity__reduced_virulence	58.211	0	761
g4739.t1	G4MWK9#PHI:8929#MoSCAD3_(MGG_01180)#318829#Magnaporthe_oryzae#reduced_virulence	58.175	3.55e-111	324
g4073.t1	I1RIH3#PHI:1710#GzZC025#5518#Fusarium_graminearum#unaffected_pathogenicity	58.127	1.16e-120	382
g10757.t1	G4MLU0#PHI:2208#endo-1_4-beta-xylanase_[GH10_family]#318829#Magnaporthe_oryzae#reduced_virulence	58.065	1.88e-133	398
g11359.t1	Q2VLJ1#PHI:716#ZEB1#5518#Fusarium_graminearum#unaffected_pathogenicity	58.049	5.48e-87	272
g764.t1	I1RPI4#PHI:1002#GCS1#5518#Fusarium_graminearum#reduced_virulence__unaffected_pathogenicity	57.944	0	640
g12109.t1	G4NCF7#PHI:2138#SGA1#318829#Magnaporthe_oryzae#unaffected_pathogenicity__loss_of_pathogenicity	57.944	1.74e-34	134
g9518.t1	A0A0D2XPQ9#PHI:7636#PARG#5507#Fusarium_oxysporum#unaffected_pathogenicity	57.94	0	547
g508.t1	G4MW86#PHI:5594#FZC5#318829#Magnaporthe_oryzae#unaffected_pathogenicity	57.937	0	858
g623.t1	J5JDI1#PHI:3095#Ktr1#176275#Beauveria_bassiana#unaffected_pathogenicity	57.928	0	576
g5575.t1	I1RG94#PHI:1322#GzbZIP004#5518#Fusarium_graminearum#unaffected_pathogenicity	57.851	9.92e-34	123
g3083.t1	G2XD29#PHI:2731#VdSge1#27337#Verticillium_dahliae#loss_of_pathogenicity	57.829	0	657
g2098.t1	Q4WEN8#PHI:2522#SPE2#746128#Aspergillus_fumigatus#lethal	57.824	0	544
g11893.t1	I1RCI2#PHI:1350#GzC2H010#5518#Fusarium_graminearum#unaffected_pathogenicity	57.807	3.19e-98	293
g4750.t1	I1RB90#PHI:1983#GzZC298#5518#Fusarium_graminearum#lethal	57.787	0	1088
g8263.t1	Q4WJR9#PHI:6554#sB#746128#Aspergillus_fumigatus#unaffected_pathogenicity	57.78	0	908
g9993.t1	I1RCJ3#PHI:1351#GzC2H011#5518#Fusarium_graminearum#unaffected_pathogenicity	57.771	0	753
g5688.t1	I1RJB0#PHI:1880#GzZC195#5518#Fusarium_graminearum#unaffected_pathogenicity	57.749	0	692
g10320.t1	A7EB00#PHI:3936#Ss-caf1#5180#Sclerotinia_sclerotiorum#loss_of_pathogenicity	57.732	4.24e-76	230
g4971.t1	I1RV71#PHI:1812#GzZC127#5518#Fusarium_graminearum#unaffected_pathogenicity	57.717	0	697
g6910.t1	G4NCF7#PHI:2138#SGA1#318829#Magnaporthe_oryzae#unaffected_pathogenicity__loss_of_pathogenicity	57.704	0	790
g11244.t1	A5H456#PHI:867__PHI:1159#MgAtr7#1047171#Zymoseptoria_tritici#unaffected_pathogenicity__chemistry_target:_sensitivity_to_chemical	57.692	2.79e-114	403
g2466.t1	I1R9D4#PHI:2000#GzZC315#5518#Fusarium_graminearum#unaffected_pathogenicity	57.68	0	701
g8619.t1	Q8TG40#PHI:4925#Hbr1#5476#Candida_albicans#reduced_virulence	57.658	1.98e-41	139
g4630.t1	I1RA07#PHI:1538__PHI:4209__PHI:4236#GzMyb002__MYT3#5518#Fusarium_graminearum#reduced_virulence	57.652	0	1774
g6012.t1	E9RBG1#PHI:4230__PHI:8901#abcB__abcG1#746128#Aspergillus_fumigatus#reduced_virulence__unaffected_pathogenicity	57.603	0	1697
g4415.t1	Q5AG40#PHI:2553#VPS4#5476#Candida_albicans#loss_of_pathogenicity	57.506	1.18e-178	509
g8665.t1	W7MS01#PHI:3389#FVEG_12521#117187#Fusarium_verticillioides#unaffected_pathogenicity	57.485	0	570
g1845.t1	I1RAH1#PHI:4658#FgHXK1#5518#Fusarium_graminearum#reduced_virulence	57.424	0	560
g6633.t1	Q4WEM7#PHI:2521#GUS1#746128#Aspergillus_fumigatus#lethal	57.416	0	707
g8777.t1	G4MYY5#PHI:7993#PoVrl1_(MGG_10958)__PoVrl1#318829#Magnaporthe_oryzae#unaffected_pathogenicity	57.389	0	1518
g10651.t1	I1RDW5#PHI:5816#Fgsg01833#5518#Fusarium_graminearum#unaffected_pathogenicity	57.368	2.19e-147	425
g11821.t1	Q4WDL0#PHI:2525#TOM40#746128#Aspergillus_fumigatus#lethal	57.349	4.57e-145	417
g7037.t1	G4MT25#PHI:5591#MoNIT4#318829#Magnaporthe_oryzae#unaffected_pathogenicity	57.336	0	1027
g6167.t1	I1RIL9#PHI:8803#FgShyC_(FGSG_03657)#5518#Fusarium_graminearum#unaffected_pathogenicity	57.314	1.31e-176	503
g12723.t1	I1RFF7#PHI:1837#GzZC152#5518#Fusarium_graminearum#unaffected_pathogenicity	57.303	4.13e-95	301
g9925.t1	I1RMX8#PHI:1939#GzZC254#5518#Fusarium_graminearum#unaffected_pathogenicity	57.303	1.99e-70	218
g1433.t1	I1R980#PHI:2393#(O-methylsterigmatocystin_oxidoreductase)#5518#Fusarium_graminearum#increased_virulence_(hypervirulence)	57.172	0	580
g11126.t1	I1RSH6#PHI:1510#GzHOME005#5518#Fusarium_graminearum#unaffected_pathogenicity	57.089	0	537
g9193.t1	I1RF25#PHI:1657#GzCCCH001#5518#Fusarium_graminearum#unaffected_pathogenicity	57.06	0	2140
g8185.t1	I1S832#PHI:1723#GzZC038#5518#Fusarium_graminearum#unaffected_pathogenicity	57.003	0	1040
g11025.t1	Q00298#PHI:69#CUTA#40559#Botrytis_cinerea#unaffected_pathogenicity	56.962	1.67e-53	172
g3098.t1	I1RJY5#PHI:1576#GzOB016#5518#Fusarium_graminearum#unaffected_pathogenicity	56.955	0	627
g3539.t1	J4UPL6#PHI:5394#mas5#176275#Beauveria_bassiana#loss_of_pathogenicity	56.944	6.35e-19	85.1
g12837.t1	G4MNA5#PHI:2096#Calcium-transporting_ATPase_3#318829#Magnaporthe_oryzae#loss_of_pathogenicity	56.914	0	1222
g6790.t1	I1RN20#PHI:1373#GzC2H036#5518#Fusarium_graminearum#unaffected_pathogenicity	56.891	5.84e-101	309
g11641.t1	I1S6C7#PHI:1730#GzZC045#5518#Fusarium_graminearum#unaffected_pathogenicity	56.871	0	802
g1808.t1	A7F946#PHI:2411#Ss-ggt1#5180#Sclerotinia_sclerotiorum#reduced_virulence	56.831	4.55e-138	413
g2314.t1	Q59RG0#PHI:511#CaNAG4#5476#Candida_albicans#reduced_virulence	56.809	0	530
g3996.t1	I1RSA6#PHI:1488#GzHMG020#5518#Fusarium_graminearum#unaffected_pathogenicity	56.799	0	1211
g2618.t1	G4N3Y8#PHI:5603#FZC13#318829#Magnaporthe_oryzae#unaffected_pathogenicity	56.699	0	556
g1611.t1	J4KMX0#PHI:7152#pmcB#176275#Beauveria_bassiana#reduced_virulence	56.694	0	1140
g10555.t1	G4N3D8#PHI:5622#FZC28#318829#Magnaporthe_oryzae#unaffected_pathogenicity	56.637	0	863
g1802.t1	A5HF03#PHI:1057#MTP1#318829#Magnaporthe_oryzae#unaffected_pathogenicity	56.616	0	557
g10204.t1	I1RW03#PHI:1679#GzMIZ001#5518#Fusarium_graminearum#unaffected_pathogenicity	56.614	1.41e-129	380
g1700.t1	I1R9K1#PHI:1991#GzZC306#5518#Fusarium_graminearum#lethal	56.573	0	721
g5103.t1	G4NCK1#PHI:2149#MoLDB1#318829#Magnaporthe_oryzae#reduced_virulence__loss_of_pathogenicity	56.533	7.22e-126	384
g9220.t1	G4MTK2#PHI:5232#MoARG1#318829#Magnaporthe_oryzae#loss_of_pathogenicity	56.522	4.3e-34	122
g6445.t1	G4NFU3#PHI:2103#MGG_08710.5#318829#Magnaporthe_oryzae#unaffected_pathogenicity	56.515	0	577
g11105.t1	I1S0H5#PHI:7717#FgOXP1#5518#Fusarium_graminearum#reduced_virulence	56.466	0	1466
g12044.t1	G4YQK3#PHI:6261#PsAAT3#67593#Phytophthora_sojae#reduced_virulence	56.459	1.11e-166	478
g8029.t1	G4ZAY8#PHI:5016#Psimpa1#67593#Phytophthora_sojae#reduced_virulence	56.443	0	565
g11686.t1	Q0U6E8#PHI:2249__PHI:2270#Mpd1#13684#Parastagonospora_nodorum#unaffected_pathogenicity	56.41	3.44e-149	431
g6463.t1	I1RB12#PHI:1968#GzZC283#5518#Fusarium_graminearum#unaffected_pathogenicity	56.387	0	834
g7325.t1	J9VSX1#PHI:7186#ADE13#5207#Cryptococcus_neoformans#reduced_virulence	56.347	1.23e-163	488
g9027.t1	W5ZQ93#PHI:3417#Ohmm#176275#Beauveria_bassiana#increased_virulence_(hypervirulence)	56.344	0	1080
g3378.t1	I1RAT9#PHI:1985#GzZC300#5518#Fusarium_graminearum#unaffected_pathogenicity	56.336	0	828
g6091.t1	I1RE55#PHI:1616#GzssDB001#5518#Fusarium_graminearum#unaffected_pathogenicity	56.25	0	1117
g1955.t1	I1S0H5#PHI:7717#FgOXP1#5518#Fusarium_graminearum#reduced_virulence	56.217	0	1466
g7954.t1	G4MZS7#PHI:800#MGG_13324#318829#Magnaporthe_oryzae#reduced_virulence	56.168	0	1247
g1122.t1	E9RBG1#PHI:4230__PHI:8901#abcB__abcG1#746128#Aspergillus_fumigatus#reduced_virulence__unaffected_pathogenicity	56.128	0	1662
g4607.t1	I1RBB7#PHI:1475#GzHMG007#5518#Fusarium_graminearum#unaffected_pathogenicity	56.127	0	672
g9420.t1	E3Q2L6#PHI:6825#GPI12#31870#Colletotrichum_graminicola#loss_of_pathogenicity	56.098	3.65e-116	347
g7508.t1	Q4W9S1#PHI:6557#cysB#746128#Aspergillus_fumigatus#unaffected_pathogenicity__reduced_virulence	56.093	0	591
g3128.t1	G4NIR9#PHI:806#MGG_04137#318829#Magnaporthe_oryzae#reduced_virulence	56.061	4.44e-89	273
g3038.t1	A7U5U4#PHI:2058#LHS1#318829#Magnaporthe_oryzae#reduced_virulence	56.039	0	1051
g831.t1	Q5A5P7#PHI:4891#orf19.5352#5476#Candida_albicans#unaffected_pathogenicity	56.019	2.49e-85	261
g9810.t1	I1S1Y4#PHI:1498#GzHMG030#5518#Fusarium_graminearum#lethal	56	3.53e-37	133
g2504.t1	T2C7K6#PHI:3226#pnl1#36651#Penicillium_digitatum#reduced_virulence	55.988	2.86e-125	369
g6285.t1	Q4WPM7#PHI:6146#HorA#746128#Aspergillus_fumigatus#reduced_virulence	55.973	6.37e-115	336
g11934.t1	G4NIU3#PHI:789#MGG_04116#318829#Magnaporthe_oryzae#reduced_virulence	55.94	0	799
g7006.t1	C4YR40#PHI:4904#Glr1#5476#Candida_albicans#reduced_virulence	55.936	3.46e-180	518
g7620.t1	J9VUY6#PHI:6871#gua1#5207#Cryptococcus_neoformans#loss_of_pathogenicity	55.926	0	583
g11481.t1	Q4WZP3#PHI:8875#gefA_(Afu2g16240)#746128#Aspergillus_fumigatus#unaffected_pathogenicity__loss_of_pathogenicity	55.905	0	1248
g12429.t1	G4NEK6#PHI:2029#TGL2#318829#Magnaporthe_oryzae#unaffected_pathogenicity	55.897	5.53e-67	211
g8255.t1	I1RBW7#PHI:1243#FGSG_01058#5518#Fusarium_graminearum#unaffected_pathogenicity	55.893	0	896
g1121.t1	I1RY88#PHI:1825#GzZC140#5518#Fusarium_graminearum#unaffected_pathogenicity	55.882	0	601
g5343.t1	I1S0H5#PHI:7717#FgOXP1#5518#Fusarium_graminearum#reduced_virulence	55.842	0	1444
g4351.t1	J4US35#PHI:8673#cryD_(EJP68422)#176275#Beauveria_bassiana#unaffected_pathogenicity	55.814	0	748
g6983.t1	N4X9G3#PHI:4233#ftr1#5016#Bipolaris_maydis#reduced_virulence	55.775	3.14e-124	365
g11626.t1	G4NDE1#PHI:1017__PHI:2067#ABC4#318829#Magnaporthe_oryzae#reduced_virulence__loss_of_pathogenicity	55.762	0	1783
g2458.t1	D2E9W8#PHI:2377#DEP3#29001#Alternaria_brassicicola#reduced_virulence__unaffected_pathogenicity	55.723	1.1e-128	382
g6389.t1	G4MXJ1#PHI:3162#Mohik8#318829#Magnaporthe_oryzae#loss_of_pathogenicity	55.636	0	1206
g11164.t1	Q4WLP9#PHI:6861#rbdA#746128#Aspergillus_fumigatus#reduced_virulence	55.556	3.29e-102	301
g9256.t1	I1RYE2#PHI:1459#GzAra007#5518#Fusarium_graminearum#unaffected_pathogenicity	55.556	6.07e-84	251
g10447.t1	Q6IVV6#PHI:547#CEL5A#40559#Botrytis_cinerea#unaffected_pathogenicity	55.482	1.5e-119	354
g753.t1	I1RPI7#PHI:1877#GzZC192#5518#Fusarium_graminearum#unaffected_pathogenicity	55.367	0	732
g8668.t1	I1RTB7#PHI:2350#MID1#5518#Fusarium_graminearum#unaffected_pathogenicity	55.267	0	667
g12216.t1	P0CS04#PHI:3490#Gmt2#5207#Cryptococcus_neoformans#loss_of_pathogenicity	55.247	6.5e-120	357
g10803.t1	J5JHE8#PHI:7377#Blys4#176275#Beauveria_bassiana#unaffected_pathogenicity	55.233	1.91e-61	191
g8644.t1	Q5ABG1#PHI:2825#SET1#5476#Candida_albicans#reduced_virulence	55.208	3.66e-88	309
g10002.t1	Q9HF03#PHI:280#CCN1#5207#Cryptococcus_neoformans#reduced_virulence	55.12	0	721
g12176.t1	I1RFG1#PHI:1936#GzZC251#5518#Fusarium_graminearum#unaffected_pathogenicity	55.119	0	751
g4938.t1	I1RG07#PHI:5781#PRE2#5518#Fusarium_graminearum#unaffected_pathogenicity	55.118	1.7e-137	400
g2081.t1	I1RXB2#PHI:1769#GzZC084#5518#Fusarium_graminearum#unaffected_pathogenicity	55.108	2.89e-97	312
g12892.t1	G4N5N0#PHI:5441#ABA_GPCR#318829#Magnaporthe_oryzae#unaffected_pathogenicity	55.085	1.73e-174	504
g5932.t1	I1S5H3#PHI:1729#GzZC044#5518#Fusarium_graminearum#unaffected_pathogenicity	55.03	0	538
g9379.t1	I1S7B9#PHI:1739#GzZC054#5518#Fusarium_graminearum#unaffected_pathogenicity	55.03	0	900
g10328.t1	I1S2A9#PHI:1784#GzZC099#5518#Fusarium_graminearum#unaffected_pathogenicity	54.967	1.74e-116	350
g8225.t1	Q4WBL9#PHI:4672#AmcA#746128#Aspergillus_fumigatus#unaffected_pathogenicity	54.934	4.33e-117	344
g10502.t1	I1RDH3#PHI:1952#GzZC267#5518#Fusarium_graminearum#unaffected_pathogenicity	54.918	2.17e-58	186
g5197.t1	E9RBG1#PHI:4230__PHI:8901#abcB__abcG1#746128#Aspergillus_fumigatus#reduced_virulence__unaffected_pathogenicity	54.905	0	1631
g3174.t1	I1RU19#PHI:1886#GzZC201#5518#Fusarium_graminearum#unaffected_pathogenicity	54.854	3.28e-152	446
g1733.t1	I1S2J6#PHI:9039#fgm2_(FGSG_10992)#5518#Fusarium_graminearum#reduced_virulence	54.849	4.88e-112	331
g10529.t1	Q4WLR6#PHI:7653#trpA#746128#Aspergillus_fumigatus#reduced_virulence	54.833	0	598
g6324.t1	I1RRN6#PHI:1547#GzMyb011#5518#Fusarium_graminearum#unaffected_pathogenicity	54.801	8.79e-159	470
g7291.t1	G4MXR2#PHI:8753__PHI:8806#MoChia1_(MGG_08054)__MoChi1_(MGG_08054)#318829#Magnaporthe_oryzae#reduced_virulence	54.78	1.82e-151	437
g2192.t1	I1RRD2#PHI:1328#GzbZIP010#5518#Fusarium_graminearum#reduced_virulence	54.69	3.77e-167	500
g1684.t1	I1RXK9#PHI:1850#GzZC165#5518#Fusarium_graminearum#unaffected_pathogenicity	54.649	0	575
g5657.t1	I1RH65#PHI:7650#FgPR-IL-3#5518#Fusarium_graminearum#unaffected_pathogenicity	54.605	2.13e-54	177
g12373.t1	Q8Y1E7#PHI:8885#aroG2#305#Ralstonia_solanacearum#unaffected_pathogenicity__loss_of_pathogenicity	54.598	1.19e-128	377
g7033.t1	A0A0E0S4Y7#PHI:8646#FgLDHL2_(FGSG_16220)#5518#Fusarium_graminearum#reduced_virulence	54.545	0	527
g3742.t1	I1RAN6#PHI:1768#GzZC083#5518#Fusarium_graminearum#unaffected_pathogenicity	54.545	2.01e-67	207
g7890.t1	Q4WWN9#PHI:2518#MET16#746128#Aspergillus_fumigatus#lethal	54.487	3.85e-125	363
g8078.t1	T2C7K6#PHI:3226#pnl1#36651#Penicillium_digitatum#reduced_virulence	54.474	4.44e-124	365
g527.t1	I1RFN9#PHI:1656#GzYL#5518#Fusarium_graminearum#lethal	54.46	0	719
g6976.t1	I1RMG1#PHI:1484#GzHMG016#5518#Fusarium_graminearum#unaffected_pathogenicity	54.414	0	645
g7063.t1	G4MQW5#PHI:7320#GH18#318829#Magnaporthe_oryzae#unaffected_pathogenicity	54.386	3.55e-151	438
g2152.t1	Q4X1Y0#PHI:2514#PFS2#746128#Aspergillus_fumigatus#lethal	54.348	4.58e-178	518
g11910.t1	Q4WXL8#PHI:2538#AUR1#746128#Aspergillus_fumigatus#lethal__unaffected_pathogenicity	54.342	3.25e-145	425
g11732.t1	Q4WQM5#PHI:7692#FlcA#746128#Aspergillus_fumigatus#loss_of_pathogenicity	54.24	0	764
g12912.t1	I1RM25#PHI:1579#GzOB019#5518#Fusarium_graminearum#unaffected_pathogenicity	54.237	0	746
g12480.t1	I1S134#PHI:1767#GzZC082#5518#Fusarium_graminearum#unaffected_pathogenicity	54.201	1.62e-136	418
g5940.t1	W6ZBM1#PHI:4989#Ppt1#101162#Bipolaris_oryzae#reduced_virulence	54.167	1.07e-109	342
g11108.t1	I1RSG4#PHI:1586#GzOB026#5518#Fusarium_graminearum#unaffected_pathogenicity	54.167	1.51e-51	166
g9928.t1	Q4WMS3#PHI:2549#MAK5#746128#Aspergillus_fumigatus#lethal	54.16	0	580
g585.t1	I1S8Y4#PHI:1338#GzbZIP020#5518#Fusarium_graminearum#unaffected_pathogenicity	54.14	4.68e-99	296
g2543.t1	I1RHQ1#PHI:7651#FgPR-IL-4#5518#Fusarium_graminearum#reduced_virulence	54.135	7.59e-38	138
g6031.t1	G4N170#PHI:5682#FZC78#318829#Magnaporthe_oryzae#unaffected_pathogenicity	54.134	0	850
g6212.t1	A0A0E3USI9#PHI:4845#PL1332#29001#Alternaria_brassicicola#reduced_virulence	54.065	2.12e-83	251
g1749.t1	I1R9J1#PHI:1271#FGSG_00132#5518#Fusarium_graminearum#unaffected_pathogenicity	54.032	1.5e-88	271
g8852.t1	B0XVF7#PHI:2292#aoxA#746128#Aspergillus_fumigatus#unaffected_pathogenicity	53.936	2.31e-125	367
g2125.t1	G4N3K2#PHI:882#MGG_04985#318829#Magnaporthe_oryzae#reduced_virulence	53.88	0	631
g9850.t1	Q0QWD8#PHI:598#THIOL#5022#Leptosphaeria_maculans#reduced_virulence	53.867	2.77e-129	380
g9556.t1	G4MR33#PHI:6396#MoMNR2#318829#Magnaporthe_oryzae#reduced_virulence	53.855	0	772
g4696.t1	Q8J214#PHI:346#CRU1#5270#Ustilago_maydis#reduced_virulence	53.801	3.6e-170	509
g4550.t1	A0A1C3YI15#PHI:5833#Fgsg00994#5518#Fusarium_graminearum#unaffected_pathogenicity	53.76	1.42e-139	404
g4516.t1	G4MYZ2#PHI:2078#Moatg10#318829#Magnaporthe_oryzae#loss_of_pathogenicity	53.755	8.78e-94	279
g11173.t1	I1RUP7#PHI:1493#GzHMG025#5518#Fusarium_graminearum#unaffected_pathogenicity	53.753	0	672
g5896.t1	E9R863#PHI:5267#UgeB#162425#Aspergillus_nidulans#increased_virulence_(hypervirulence)	53.747	3.08e-148	432
g5455.t1	Q5XTQ4#PHI:541#LIP1#40559#Botrytis_cinerea#unaffected_pathogenicity	53.739	0	624
g6651.t1	A0A076ZMY5#PHI:7520#VK055_1952#573#Klebsiella_pneumoniae#unaffected_pathogenicity	53.734	2.05e-158	462
g5947.t1	G4NGA7#PHI:2032#VTL1#318829#Magnaporthe_oryzae#unaffected_pathogenicity	53.64	0	594
g12010.t1	G4MQB0#PHI:3066#MoRga6#318829#Magnaporthe_oryzae#unaffected_pathogenicity	53.638	0	940
g4143.t1	I1RFM6#PHI:744#ADE5#5518#Fusarium_graminearum#reduced_virulence	53.613	7.12e-151	451
g9499.t1	I1RTJ6#PHI:1389#GzC2H052#5518#Fusarium_graminearum#lethal	53.607	0	793
g5190.t1	I1S3J7#PHI:1424#GzC2H092#5518#Fusarium_graminearum#unaffected_pathogenicity	53.571	1.01e-14	76.3
g3587.t1	G4N7K5#PHI:3062#MoRga2#318829#Magnaporthe_oryzae#unaffected_pathogenicity	53.48	0	665
g763.t1	Q99324#PHI:191#TOM1#39703#Septoria_lycopersici#unaffected_pathogenicity	53.479	0	810
g9751.t1	N4X9G3#PHI:4233#ftr1#5016#Bipolaris_maydis#reduced_virulence	53.468	8.3e-114	337
g3544.t1	P40086#PHI:503#COX15#4932#Saccharomyces_cerevisiae#reduced_virulence	53.439	1.28e-135	403
g6509.t1	I1RB57#PHI:1346#GzC2H006#5518#Fusarium_graminearum#unaffected_pathogenicity	53.425	2.69e-19	82
g2027.t1	G4MS58#PHI:881#MGG_04556#318829#Magnaporthe_oryzae#reduced_virulence	53.412	3.84e-125	365
g10885.t1	G4MV25#PHI:6711#gel1#318829#Magnaporthe_oryzae#unaffected_pathogenicity__loss_of_pathogenicity	53.407	2.99e-165	476
g4601.t1	I1S4R6#PHI:1501#GzHMG033#5518#Fusarium_graminearum#unaffected_pathogenicity	53.407	1.74e-121	372
g11333.t1	Q4WQI8#PHI:4603#KexB#746128#Aspergillus_fumigatus#reduced_virulence	53.396	0	893
g9046.t1	C5P3X6#PHI:479#MEP1#199306#Coccidioides_posadasii#reduced_virulence	53.381	2.45e-97	290
g5067.t1	I1RKB4#PHI:1953#GzZC268#5518#Fusarium_graminearum#unaffected_pathogenicity	53.361	3.25e-180	520
g497.t1	G4NFA2#PHI:8538#MoSNF7_(MGG_04174)#318829#Magnaporthe_oryzae#reduced_virulence	53.333	1.05e-139	414
g5089.t1	W7MNK7#PHI:7147#FvPEX14#117187#Fusarium_verticillioides#unaffected_pathogenicity	53.299	3.16e-126	372
g7536.t1	J4KMX0#PHI:7152#pmcB#176275#Beauveria_bassiana#reduced_virulence	53.293	0	1107
g12351.t1	Q8MPM3#PHI:8028#Tkt#5665#Leishmania_mexicana#loss_of_pathogenicity	53.292	0	705
g9969.t1	I1S462#PHI:1336#GzbZIP018#5518#Fusarium_graminearum#unaffected_pathogenicity	53.288	1.24e-131	389
g8234.t1	I1RBU9#PHI:1557#GzNH002#5518#Fusarium_graminearum#unaffected_pathogenicity	53.219	1.4e-147	432
g7668.t1	Q59P00#PHI:2558#DUR31#5476#Candida_albicans#reduced_virulence	53.2	3.23e-178	515
g11930.t1	I1RNR1#PHI:1896#GzZC211#5518#Fusarium_graminearum#unaffected_pathogenicity	53.199	0	627
g4561.t1	G4NCG1#PHI:3234#MoLYS20#318829#Magnaporthe_oryzae#reduced_virulence	53.175	8.07e-35	124
g12011.t1	I1S4X3#PHI:1843#GzZC158#5518#Fusarium_graminearum#unaffected_pathogenicity	53.161	0	914
g12603.t1	Q4WHA4#PHI:7694#FlcC#746128#Aspergillus_fumigatus#loss_of_pathogenicity	53.086	0	661
g4838.t1	I1RCK0#PHI:1920#GzZC235#5518#Fusarium_graminearum#unaffected_pathogenicity	53.027	0	843
g3271.t1	P87199#PHI:465#KIN2#5270#Ustilago_maydis#reduced_virulence	53.012	0	973
g10770.t1	I1RPX8#PHI:1581#GzOB021#5518#Fusarium_graminearum#unaffected_pathogenicity	53.008	1.07e-96	292
g11263.t1	G4ND25#PHI:2488#Man1#318829#Magnaporthe_oryzae#unaffected_pathogenicity	52.941	1.16e-178	516
g587.t1	I1RDZ2#PHI:5809#Fgsg01861#5518#Fusarium_graminearum#unaffected_pathogenicity	52.941	2.49e-140	418
g7575.t1	Q51WZ9#PHI:2066__PHI:2077__PHI:8264#MgAtg9__Moatg9__atg9#318829__5518#Magnaporthe_oryzae__Fusarium_graminearum#loss_of_pathogenicity__unaffected_pathogenicity	52.922	0	967
g168.t1	Q00049#PHI:7768#NorA_(AflE)#5059#Aspergillus_flavus#reduced_virulence	52.91	3.6e-132	386
g6121.t1	J4UPL6#PHI:5394#mas5#176275#Beauveria_bassiana#loss_of_pathogenicity	52.874	3.22e-17	81.6
g170.t1	Q4JEX9#PHI:825#SE#5551#Trichophyton_rubrum#chemistry_target:_resistance_to_chemical	52.869	6.37e-178	512
g4305.t1	O13401#PHI:401#SOD2#5476#Candida_albicans#unaffected_pathogenicity	52.814	6.39e-79	239
g9487.t1	J4KNV2#PHI:6644#CIA30#176275#Beauveria_bassiana#increased_virulence_(hypervirulence)	52.79	5.59e-78	237
g8711.t1	I1RDG6#PHI:1555#GzMyb019#5518#Fusarium_graminearum#unaffected_pathogenicity	52.756	0	562
g10070.t1	G4MPI2#PHI:2009#HOS4#318829#Magnaporthe_oryzae#unaffected_pathogenicity	52.738	2.45e-108	379
g8274.t1	P29138#PHI:4615#Pr1#5530#Metarhizium_anisopliae#unaffected_pathogenicity	52.713	2.71e-146	423
g11731.t1	J5JPY5#PHI:5054#wetA#176275#Beauveria_bassiana#reduced_virulence	52.692	7.78e-42	159
g9568.t1	Q51UJ9#PHI:2085#Moatg11#318829#Magnaporthe_oryzae#unaffected_pathogenicity	52.669	0	1391
g3770.t1	Q59UR2#PHI:6214#MNN10#5476#Candida_albicans#reduced_virulence__unaffected_pathogenicity	52.613	1.5e-105	330
g7856.t1	Q4I1J3#PHI:1677#GzDHHC005#5518#Fusarium_graminearum#unaffected_pathogenicity	52.58	2.45e-161	471
g2240.t1	I1RXS2#PHI:1759#GzZC074#5518#Fusarium_graminearum#unaffected_pathogenicity	52.556	0	632
g12462.t1	G4MUR7#PHI:4475#MoTup1#318829#Magnaporthe_oryzae#loss_of_pathogenicity	52.555	1.47e-38	147
g11658.t1	W7N2B4#PHI:3381#FVEG_12533#117187#Fusarium_verticillioides#unaffected_pathogenicity	52.545	0	556
g7654.t1	Q4WUL6#PHI:362__PHI:2520#LYSF__LYS4#746128#Aspergillus_fumigatus#loss_of_pathogenicity__lethal	52.542	3.26e-12	65.5
g4405.t1	A0A1D8PKM5#PHI:8896#Pem2_(C3_06570C_A)#5476#Candida_albicans#increased_virulence_(hypervirulence)	52.532	3.11e-54	176
g3047.t1	U3PW09#PHI:7047#Aqp1#5207#Cryptococcus_neoformans#unaffected_pathogenicity	52.521	6.58e-77	249
g6950.t1	P42375#PHI:3085#GroEL#837#Porphyromonas_gingivalis#increased_virulence_(hypervirulence)	52.453	0	535
g7120.t1	I1S780#PHI:1741#GzZC056#5518#Fusarium_graminearum#unaffected_pathogenicity	52.439	2.35e-137	415
g6591.t1	Q9X4G0#PHI:5042#hmgA#287#Pseudomonas_aeruginosa#increased_virulence_(hypervirulence)__reduced_virulence	52.414	1.95e-143	421
g12728.t1	I1RLI4#PHI:1979#GzZC294#5518#Fusarium_graminearum#unaffected_pathogenicity	52.412	0	596
g2827.t1	I1S054#PHI:1854#GzZC169#5518#Fusarium_graminearum#unaffected_pathogenicity	52.409	0	705
g6783.t1	G4MRQ6#PHI:801__PHI:8650#MGG_04621__Poyth1_(MGG_04621)#318829#Magnaporthe_oryzae#reduced_virulence	52.405	1.19e-179	527
g2427.t1	I1S584#PHI:1687#GzZC002#5518#Fusarium_graminearum#unaffected_pathogenicity	52.402	0	676
g65.t1	I1S0U2#PHI:1651#GzWing023#5518#Fusarium_graminearum#unaffected_pathogenicity	52.392	5.2e-158	456
g8874.t1	G4MPJ4#PHI:4053#Pax1#318829#Magnaporthe_oryzae#loss_of_pathogenicity	52.391	0	806
g84.t1	Q9P8L8#PHI:544#BCMFS1#40559#Botrytis_cinerea#unaffected_pathogenicity	52.381	0	651
g9992.t1	J9W1N5#PHI:3527#PHO840#5207#Cryptococcus_neoformans#reduced_virulence	52.358	0	626
g9869.t1	I1S2J9#PHI:3924__PHI:8224__PHI:9036#FgABC1__Fg10995__fgm5_(FGSG_10995)#5518#Fusarium_graminearum#reduced_virulence	52.345	0	1475
g5006.t1	W7N2A8#PHI:3383#FVEG_12531#117187#Fusarium_verticillioides#unaffected_pathogenicity	52.342	9.84e-132	385
g1088.t1	E9R863#PHI:5267#UgeB#162425#Aspergillus_nidulans#increased_virulence_(hypervirulence)	52.326	3.83e-151	439
g458.t1	P0A1D7#PHI:3040#ClpP#28901#Salmonella_enterica#reduced_virulence	52.299	1.04e-60	194
g5581.t1	Q32WF7#PHI:2269#Mdh1#13684#Parastagonospora_nodorum#unaffected_pathogenicity	52.29	2.35e-86	261
g646.t1	Q6QIY0#PHI:2382#Upa2#5270#Ustilago_maydis#unaffected_pathogenicity	52.28	8.09e-117	343
g3141.t1	G5EHD3#PHI:3014#MoAND1#318829#Magnaporthe_oryzae#reduced_virulence	52.279	0	1759
g7357.t1	D4I2L5#PHI:7253#KatA#552#Erwinia_amylovora#reduced_virulence	52.273	5.18e-24	96.7
g7255.t1	D0ERY7#PHI:2202__PHI:7327#PdeH__MopdeH#318829#Magnaporthe_oryzae#reduced_virulence__loss_of_pathogenicity	52.231	0	920
g7400.t1	I1RM60#PHI:1371#GzC2H034#5518#Fusarium_graminearum#unaffected_pathogenicity	52.222	8.24e-96	285
g5045.t1	I1RK97#PHI:1368#GzC2H029#5518#Fusarium_graminearum#unaffected_pathogenicity	52.186	3.38e-113	338
g4079.t1	I1RHV1#PHI:6123__PHI:5715#FGSG_03366__ScOrtholog_PHO12#5518#Fusarium_graminearum#reduced_virulence__unaffected_pathogenicity	52.183	3.67e-179	514
g10660.t1	I1RP88#PHI:1226#FGSG_05845#5518#Fusarium_graminearum#lethal	52.16	2.43e-97	308
g9994.t1	I1RCJ3#PHI:1351#GzC2H011#5518#Fusarium_graminearum#unaffected_pathogenicity	52.159	2.9e-79	264
g2932.t1	Q5AG40#PHI:2553#VPS4#5476#Candida_albicans#loss_of_pathogenicity	52.147	3.93e-113	355
g1712.t1	O60034#PHI:1030#bcatrA#40559#Botrytis_cinerea#unaffected_pathogenicity	52.052	0	1514
g216.t1	G4NKL4#PHI:3063#MoRga3#318829#Magnaporthe_oryzae#unaffected_pathogenicity	52.051	0	733
g9106.t1	Q2VLJ1#PHI:716#ZEB1#5518#Fusarium_graminearum#unaffected_pathogenicity	52.022	0	620
g26.t1	I1S4E2#PHI:1737#GzZC052#5518#Fusarium_graminearum#unaffected_pathogenicity	52.018	0	642
g6085.t1	I1RE60#PHI:1481#GzHMG013#5518#Fusarium_graminearum#unaffected_pathogenicity	51.983	2.87e-114	370
g2433.t1	I1SAR3#PHI:1285#FGSG_13944#5518#Fusarium_graminearum#unaffected_pathogenicity	51.957	2.39e-95	284
g2204.t1	I1S5J4#PHI:1866#GzZC181#5518#Fusarium_graminearum#unaffected_pathogenicity	51.923	2.63e-32	120
g7512.t1	C5BF98#PHI:2959#mdh#67780#Edwardsiella_ictaluri#reduced_virulence	51.911	1.2e-91	279
g496.t1	G4NFA1#PHI:6930#MoRAD18#318829#Magnaporthe_oryzae#unaffected_pathogenicity	51.889	4.13e-120	363
g6156.t1	G2X6V8#PHI:6331#VdCYP1#27337#Verticillium_dahliae#loss_of_pathogenicity	51.883	7.7e-172	513
g10866.t1	Q5ANA8#PHI:6795#CaMCA1#5476#Candida_albicans#reduced_virulence	51.882	1.89e-116	365
g1770.t1	W7M3S4#PHI:7144#FvSCP1#117187#Fusarium_verticillioides#reduced_virulence	51.852	3.08e-110	327
g5051.t1	G4NAT7#PHI:3811#TDG4#318829#Magnaporthe_oryzae#reduced_virulence	51.852	2.02e-12	61.2
g12591.t1	Q9C2Y4#PHI:405#PDE1#318829#Magnaporthe_oryzae#reduced_virulence	51.844	0	1461
g2998.t1	G4NGW7#PHI:3067#MoRga7#318829#Magnaporthe_oryzae#unaffected_pathogenicity	51.843	2.74e-116	387
g7658.t1	E3KNM7#PHI:3998#Pgt-IaaM#5297#Puccinia_graminis#reduced_virulence	51.807	1.83e-22	92.8
g2878.t1	G4MTF8#PHI:2204#endo-1_4-beta-xylanase_[GH10_family]#318829#Magnaporthe_oryzae#reduced_virulence	51.78	3.64e-102	304
g1689.t1	Q8NJQ2#PHI:2839#RED1#5016#Bipolaris_maydis#reduced_virulence	51.734	2.22e-123	362
g7525.t1	I1RYV5#PHI:1514#GzHOME012#5518#Fusarium_graminearum#unaffected_pathogenicity	51.715	2.19e-108	350
g9804.t1	I1RM25#PHI:1579#GzOB019#5518#Fusarium_graminearum#unaffected_pathogenicity	51.703	0	671
g7685.t1	Q6IVV6#PHI:547#CEL5A#40559#Botrytis_cinerea#unaffected_pathogenicity	51.645	9.16e-111	333
g5721.t1	J4KLZ9#PHI:7155#pmr1#176275#Beauveria_bassiana#reduced_virulence	51.609	0	775
g4920.t1	U3MXJ8#PHI:3039#MoSPA2#318829#Magnaporthe_oryzae#unaffected_pathogenicity	51.534	0	836
g9201.t1	I1RPX8#PHI:1581#GzOB021#5518#Fusarium_graminearum#unaffected_pathogenicity	51.527	2.86e-91	278
g8866.t1	B2SI02#PHI:1139#raxQ#347#Xanthomonas_oryzae#increased_virulence_(hypervirulence)	51.515	1.64e-60	200
g7276.t1	P52498#PHI:62#caRSR1#5476#Candida_albicans#reduced_virulence	51.479	2.6e-56	182
g9414.t1	A0A1C3YJ97#PHI:5796#Fgsg02569#5518#Fusarium_graminearum#unaffected_pathogenicity	51.479	1.75e-55	183
g650.t1	Q9P470#PHI:257#GAS2#318829#Magnaporthe_oryzae#reduced_virulence	51.456	4.65e-92	278
g2865.t1	Q0U2A0#PHI:2255#Abd1#13684#Parastagonospora_nodorum#unaffected_pathogenicity	51.385	4.53e-111	333
g323.t1	Q0PND3#PHI:2031#TGL3-2#318829#Magnaporthe_oryzae#unaffected_pathogenicity	51.333	2.75e-145	433
g8108.t1	Q00049#PHI:7768#NorA_(AflE)#5059#Aspergillus_flavus#reduced_virulence	51.325	1.38e-105	319
g1260.t1	G4N983#PHI:2215#BIM1#318829#Magnaporthe_oryzae#reduced_virulence	51.323	0	2027
g4310.t1	I1RKP6#PHI:1926#GzZC241#5518#Fusarium_graminearum#unaffected_pathogenicity	51.311	7.61e-139	412
g1905.t1	Q9C1K0#PHI:224#PEP2#140110#Nectria_haematococca#reduced_virulence	51.271	1.23e-82	249
g7645.t1	I1RP88#PHI:1226#FGSG_05845#5518#Fusarium_graminearum#lethal	51.22	7.89e-25	97.4
g7474.t1	Q96VU5#PHI:387#UGD1#5207#Cryptococcus_neoformans#loss_of_pathogenicity	51.183	7.08e-157	461
g5031.t1	I1RIY9#PHI:1981#GzZC296#5518#Fusarium_graminearum#unaffected_pathogenicity	51.174	0	622
g1622.t1	Q4WUL6#PHI:362__PHI:2520#LYSF__LYS4#746128#Aspergillus_fumigatus#loss_of_pathogenicity__lethal	51.166	0	658
g127.t1	I1S0H5#PHI:7717#FgOXP1#5518#Fusarium_graminearum#reduced_virulence	51.098	0	1305
g9838.t1	I1S2R1#PHI:1423#GzC2H091#5518#Fusarium_graminearum#unaffected_pathogenicity	51.087	6.19e-22	97.8
g2810.t1	I1RL97#PHI:1862#GzZC177#5518#Fusarium_graminearum#unaffected_pathogenicity	51.049	0	540
g9444.t1	Q9X4G0#PHI:5042#hmgA#287#Pseudomonas_aeruginosa#increased_virulence_(hypervirulence)__reduced_virulence	51.034	2e-129	384
g7868.t1	P04046#PHI:502#ADE4#4932#Saccharomyces_cerevisiae#reduced_virulence	50.996	5.59e-173	503
g2595.t1	H8ZZ79#PHI:2710#mepB#474922#Colletotrichum_gloeosporioides#reduced_virulence	50.976	2.35e-144	424
g1698.t1	W7N2A8#PHI:3383#FVEG_12531#117187#Fusarium_verticillioides#unaffected_pathogenicity	50.964	6.05e-128	376
g12844.t1	I1RIC0#PHI:1947#GzZC262#5518#Fusarium_graminearum#unaffected_pathogenicity	50.948	0	847
g10470.t1	F9XJV5#PHI:2441#MgAlg2#1047171#Zymoseptoria_tritici#loss_of_pathogenicity	50.93	8.12e-142	419
g11534.t1	G4MRP7#PHI:803#MGG_04629#318829#Magnaporthe_oryzae#reduced_virulence	50.929	0	1061
g9292.t1	Q0V515#PHI:3914#Sdh1#13684#Parastagonospora_nodorum#reduced_virulence	50.928	7.85e-169	489
g2145.t1	G4N054#PHI:2018__PHI:2106#MoPLC2__MGG_05332.5#318829#Magnaporthe_oryzae#loss_of_pathogenicity__reduced_virulence	50.922	0	655
g1918.t1	G4ND25#PHI:2488#Man1#318829#Magnaporthe_oryzae#unaffected_pathogenicity	50.913	2.07e-153	452
g3470.t1	G4NIP2#PHI:783__PHI:2068#MGG_04163__DES1#318829#Magnaporthe_oryzae#reduced_virulence	50.868	0	1066
g3502.t1	G4YQK3#PHI:6261#PsAAT3#67593#Phytophthora_sojae#reduced_virulence	50.862	1.58e-124	375
g9787.t1	A0A1D8PKX3#PHI:8905#VMA6#5476#Candida_albicans#reduced_virulence	50.82	2.73e-123	362
g1958.t1	A0A1C3YMR1#PHI:5788#Fgsg03215#5518#Fusarium_graminearum#unaffected_pathogenicity	50.799	3.24e-105	314
g5137.t1	X5FD66#PHI:4525#PFP1#914237#Rhynchosporium_commune#reduced_virulence	50.788	0	1083
g840.t1	I1RL06#PHI:3697__PHI:3925#FgABC1__FgABC3#5518#Fusarium_graminearum#reduced_virulence	50.746	1.55e-62	223
g5585.t1	Q4WUL6#PHI:362__PHI:2520#LYSF__LYS4#746128#Aspergillus_fumigatus#loss_of_pathogenicity__lethal	50.725	1.93e-16	76.6
g11334.t1	G4MQZ2#PHI:2038#Mir1#318829#Magnaporthe_oryzae#unaffected_pathogenicity	50.645	1.34e-82	254
g9798.t1	I1S2A9#PHI:1784#GzZC099#5518#Fusarium_graminearum#unaffected_pathogenicity	50.638	1.75e-154	450
g5596.t1	G4NGH0#PHI:4489#C3HC#318829#Magnaporthe_oryzae#reduced_virulence	50.633	2.16e-172	500
g7749.t1	J9VMW8#PHI:3457#PHO84#5207#Cryptococcus_neoformans#reduced_virulence	50.53	0	537
g10128.t1	A0A290WI18#PHI:7706#VEDA_05196#27337#Verticillium_dahliae#reduced_virulence__unaffected_pathogenicity__increased_virulence_(hypervirulence)	50.52	2.55e-174	508
g12186.t1	G4MV34#PHI:8049#Siz1#318829#Magnaporthe_oryzae#reduced_virulence	50.51	5.56e-121	365
g6855.t1	Q5KN74#PHI:7207#msh2#5207#Cryptococcus_neoformans#unaffected_pathogenicity	50.496	0	870
g9113.t1	Q00845#PHI:180#PELD#140110#Nectria_haematococca#reduced_virulence	50.472	1.32e-58	191
g9447.t1	I1RQU8#PHI:1714#GzZC029#5518#Fusarium_graminearum#lethal	50.469	0	692
g3348.t1	G4N027#PHI:2169#MGG_06188.6#318829#Magnaporthe_oryzae#reduced_virulence	50.435	1.02e-135	402
g2171.t1	A0N0D1#PHI:2216#PemG1#318829#Magnaporthe_oryzae#effector_(plant_avirulence_determinant)	50.41	1.89e-42	153
g7047.t1	A0A1W5T7B8#PHI:7243#pks15#176275#Beauveria_bassiana#reduced_virulence	50.397	1.97e-68	233
g4873.t1	Q4WWT7#PHI:4896#aspE#746128#Aspergillus_fumigatus#unaffected_pathogenicity	50.382	1.09e-155	458
g11887.t1	Q6X269#PHI:338#CLB2#5270#Ustilago_maydis#reduced_virulence	50.373	1.71e-93	298
g6831.t1	I1RZL9#PHI:1497#GzHMG029#5518#Fusarium_graminearum#reduced_virulence	50.35	3.03e-154	456
g10475.t1	J9VMG2#PHI:4883#Kcs1#5207#Cryptococcus_neoformans#reduced_virulence__loss_of_pathogenicity	50.35	4.62e-41	164
g10744.t1	J7MF98#PHI:2700#lac2#5465#Colletotrichum_orbiculare#reduced_virulence	50.345	0	602
g5086.t1	Q4WKJ9#PHI:2546#BRX1#746128#Aspergillus_fumigatus#lethal	50.314	4.07e-97	294
g2607.t1	I1RTU2#PHI:1872#GzZC187#5518#Fusarium_graminearum#lethal	50.262	1.79e-121	364
g3821.t1	J4KR13#PHI:5055#vosA#176275#Beauveria_bassiana#reduced_virulence	50.254	1.12e-60	201
g5867.t1	O59928#PHI:144#CHT42#29875#Trichoderma_virens#reduced_virulence	50.251	5.75e-138	407
g11585.t1	G4NC32#PHI:4492#RanBP#318829#Magnaporthe_oryzae#loss_of_pathogenicity	50.233	0	572
g12393.t1	C5BAT0#PHI:2961#gcvP#67780#Edwardsiella_ictaluri#reduced_virulence	50.149	0	920
g5579.t1	Q0UA24#PHI:2256#Xdh1#13684#Parastagonospora_nodorum#unaffected_pathogenicity	50.139	9.54e-122	370
g514.t1	A6RSE2#PHI:7159#bcelp4#40559#Botrytis_cinerea#reduced_virulence	50.131	2.7e-109	328
g12337.t1	Q5A679#PHI:4906#Gyp1#5476#Candida_albicans#reduced_virulence	50.127	1.26e-116	362
g4930.t1	G4MRB0#PHI:815#MGG_04685#318829#Magnaporthe_oryzae#reduced_virulence	50.124	0	638
g4146.t1	I1RFM6#PHI:744#ADE5#5518#Fusarium_graminearum#reduced_virulence	50.118	7.19e-130	396
g12635.t1	I1RHR0#PHI:1904#GzZC219#5518#Fusarium_graminearum#unaffected_pathogenicity	50.082	0	643
g9764.t1	I1RH59#PHI:1925#GzZC240#5518#Fusarium_graminearum#unaffected_pathogenicity	50.076	0	633
g7110.t1	A0A098DTB5#PHI:5802#PRE1#5518#Fusarium_graminearum#unaffected_pathogenicity	50	0	531
g3485.t1	I1RJE6#PHI:5790#Fgsg03962#5518#Fusarium_graminearum#unaffected_pathogenicity	50	8.88e-110	342
g3569.t1	Q1L5B8#PHI:2055#PPT1#31870#Colletotrichum_graminicola#loss_of_pathogenicity	50	1.55e-95	287
g12023.t1	G4N6P2#PHI:5366#MoSyn8#318829#Magnaporthe_oryzae#reduced_virulence	50	1.21e-84	257
g9148.t1	Q00049#PHI:7768#NorA_(AflE)#5059#Aspergillus_flavus#reduced_virulence	50	3.47e-62	201
g6993.t1	G4MRI4#PHI:810#MGG_02436#318829#Magnaporthe_oryzae#reduced_virulence	50	7.73e-22	86.7
g9264.t1	Q8RP09#PHI:981#hopI1#317#Pseudomonas_syringae#effector_(plant_avirulence_determinant)	50	5.4e-12	66.6
g9360.t1	I1R9T1#PHI:1341#GzC2H001#5518#Fusarium_graminearum#unaffected_pathogenicity	50	1.53e-10	56.6
g250.t1	G4MS03#PHI:2006__PHI:2008#HST1#318829#Magnaporthe_oryzae#unaffected_pathogenicity	49.905	2.2e-168	490
g301.t1	I1RWV5#PHI:1746#GzZC061#5518#Fusarium_graminearum#unaffected_pathogenicity	49.893	0	862
g2929.t1	I1S1D3#PHI:1822#GzZC137#5518#Fusarium_graminearum#unaffected_pathogenicity	49.839	0	565
g10661.t1	I1REJ1#PHI:1662#GzCCHC002#5518#Fusarium_graminearum#unaffected_pathogenicity	49.794	9.26e-64	219
g6925.t1	Q4X0M4#PHI:2527#SEC31#746128#Aspergillus_fumigatus#lethal__loss_of_pathogenicity	49.775	0	1188
g10235.t1	G4NIZ2#PHI:2090#Moatg29#318829#Magnaporthe_oryzae#unaffected_pathogenicity	49.775	2.06e-94	310
g5427.t1	G4ZHR2#PHI:6868#PsXEG1#67593#Phytophthora_sojae#effector_(plant_avirulence_determinant)	49.772	1.81e-66	208
g4309.t1	B0JFC8#PHI:2304#BCFHG1#40559#Botrytis_cinerea#unaffected_pathogenicity	49.764	7.14e-136	399
g6518.t1	B0XUP5#PHI:3238#ctrC#746128#Aspergillus_fumigatus#unaffected_pathogenicity	49.751	1.48e-58	187
g12178.t1	I1RFN6#PHI:1305#GzbHLH006#5518#Fusarium_graminearum#unaffected_pathogenicity	49.682	2.05e-64	217
g8118.t1	G4MT75#PHI:3312#gta1#318829#Magnaporthe_oryzae#reduced_virulence	49.662	0	641
g7065.t1	Q2VLJ1#PHI:716#ZEB1#5518#Fusarium_graminearum#unaffected_pathogenicity	49.65	0	576
g7899.t1	I1S0H5#PHI:7717#FgOXP1#5518#Fusarium_graminearum#reduced_virulence	49.649	0	1206
g4047.t1	G4MRS8#PHI:816#MGG_04582#318829#Magnaporthe_oryzae#reduced_virulence	49.627	2.45e-88	286
g6691.t1	Q1XEW2#PHI:6963#cipC#746128#Aspergillus_fumigatus#reduced_virulence	49.587	2.89e-29	109
g2751.t1	I1RKB4#PHI:1953#GzZC268#5518#Fusarium_graminearum#unaffected_pathogenicity	49.519	8.74e-141	415
g11594.t1	G4NC26#PHI:2080#Moatg13#318829#Magnaporthe_oryzae#reduced_virulence	49.429	0	714
g2807.t1	Q4WQM5#PHI:7692#FlcA#746128#Aspergillus_fumigatus#loss_of_pathogenicity	49.427	0	660
g3682.t1	I1RP23#PHI:1834#GzZC149#5518#Fusarium_graminearum#unaffected_pathogenicity	49.404	0	570
g6224.t1	G4N3U4#PHI:5188#MoHPX1#318829#Magnaporthe_oryzae#reduced_virulence	49.345	1.19e-58	188
g3700.t1	I1RWZ1#PHI:1688#GzZC003#5518#Fusarium_graminearum#unaffected_pathogenicity	49.327	0	625
g7822.t1	O93806#PHI:174#GNA1#5476#Candida_albicans#reduced_virulence	49.315	8.79e-46	149
g4217.t1	D0ERY8#PHI:2201__PHI:7328#PdeL__MopdeL#318829#Magnaporthe_oryzae#unaffected_pathogenicity__loss_of_pathogenicity__reduced_virulence	49.301	7.98e-175	507
g6291.t1	Q27PP1#PHI:830#ERGA#162425#Aspergillus_nidulans#chemistry_target:_resistance_to_chemical	49.282	6.81e-58	196
g7168.t1	G4NFA4#PHI:6392#CDA3#318829#Magnaporthe_oryzae#unaffected_pathogenicity	49.264	0	746
g9052.t1	I1RU69#PHI:1393#GzC2H056#5518#Fusarium_graminearum#unaffected_pathogenicity	49.248	0	771
g453.t1	Q6TDT0#PHI:420#SOD2#552467#Cryptococcus_gattii_vgiii#loss_of_pathogenicity	49.239	1.11e-64	202
g12594.t1	G4NEF1#PHI:805#MGG_00124#318829#Magnaporthe_oryzae#reduced_virulence	49.235	1.07e-168	520
g6106.t1	G4N7A0#PHI:2180#MoTea4#318829#Magnaporthe_oryzae#loss_of_pathogenicity	49.195	6.04e-147	460
g2353.t1	G7TM01#PHI:2964#AsnB#347#Xanthomonas_oryzae#reduced_virulence	49.189	1.29e-166	491
g7000.t1	Q00368#PHI:27#CAP20#474922#Colletotrichum_gloeosporioides#loss_of_pathogenicity	49.162	2.68e-60	188
g11415.t1	I1RV04#PHI:1814#GzZC129#5518#Fusarium_graminearum#lethal	49.088	2.29e-166	509
g488.t1	P04173#PHI:504#LEU2#4932#Saccharomyces_cerevisiae#reduced_virulence	49.077	3.31e-115	343
g12576.t1	I1RYC6#PHI:1824#GzZC139#5518#Fusarium_graminearum#unaffected_pathogenicity	49.023	4.96e-179	541
g10045.t1	B0YDG4#PHI:3237#ctrA2#746128#Aspergillus_fumigatus#unaffected_pathogenicity	49.007	4.64e-36	125
g12268.t1	G4N6T1#PHI:5671#FZC68#318829#Magnaporthe_oryzae#unaffected_pathogenicity	48.976	0	592
g973.t1	Q2LK92#PHI:548__PHI:2305#BcPIC5__BcFKBP12#40559#Botrytis_cinerea#reduced_virulence__unaffected_pathogenicity__increased_virulence_(hypervirulence)	48.958	7.65e-23	91.7
g4737.t1	U3PW09#PHI:7047#Aqp1#5207#Cryptococcus_neoformans#unaffected_pathogenicity	48.954	1.44e-71	228
g9370.t1	Q4WZG4#PHI:2551#NOC3#746128#Aspergillus_fumigatus#lethal	48.942	0	599
g1944.t1	W7N2B4#PHI:3381#FVEG_12533#117187#Fusarium_verticillioides#unaffected_pathogenicity	48.911	8.15e-165	483
g8034.t1	G4ZHR2#PHI:6868#PsXEG1#67593#Phytophthora_sojae#effector_(plant_avirulence_determinant)	48.879	1.24e-68	214
g7334.t1	I1S9F6#PHI:5842#Fgsg13487#5518#Fusarium_graminearum#unaffected_pathogenicity	48.864	2.83e-140	411
g1901.t1	I1RF11#PHI:5874#Fgsg02274#5518#Fusarium_graminearum#unaffected_pathogenicity	48.864	1.6e-106	319
g12477.t1	I1S170#PHI:1852#GzZC167#5518#Fusarium_graminearum#unaffected_pathogenicity	48.739	1.22e-66	221
g5883.t1	Q4WF54#PHI:2322#SidH#746128#Aspergillus_fumigatus#reduced_virulence	48.736	1.87e-84	259
g4619.t1	C4YGV6#PHI:3370#vph1#5476#Candida_albicans#reduced_virulence	48.724	0	800
g5528.t1	G5EH97#PHI:2147#Erl1#318829#Magnaporthe_oryzae#reduced_virulence	48.718	3.64e-105	315
g11741.t1	J9VJS8#PHI:3098#URA4#5207#Cryptococcus_neoformans#reduced_virulence	48.711	3.29e-107	321
g3220.t1	Q99174#PHI:2849#cutA#169388#Fusarium_solani#unaffected_pathogenicity	48.696	1.87e-72	223
g12244.t1	E0SB00#PHI:8580#purL_(Dda3937_03379)#204038#Dickeya_dadantii#reduced_virulence	48.684	0	1231
g6510.t1	Q4W9X3#PHI:3275#fhpA#746128#Aspergillus_fumigatus#unaffected_pathogenicity	48.675	2.84e-143	419
g7344.t1	J9VNE4#PHI:7828#Uxt1#5207#Cryptococcus_neoformans#reduced_virulence__unaffected_pathogenicity	48.669	3.34e-74	236
g6155.t1	I1S0U2#PHI:1651#GzWing023#5518#Fusarium_graminearum#unaffected_pathogenicity	48.635	3.19e-130	384
g8092.t1	I1RU67#PHI:1392#GzC2H055#5518#Fusarium_graminearum#unaffected_pathogenicity	48.63	7.27e-129	394
g6578.t1	Q9Y7W4#PHI:172#CRK1#5476#Candida_albicans#loss_of_pathogenicity	48.58	2.66e-105	341
g1643.t1	A5H456#PHI:867__PHI:1159#MgAtr7#1047171#Zymoseptoria_tritici#unaffected_pathogenicity__chemistry_target:_sensitivity_to_chemical	48.58	1.84e-94	320
g8868.t1	I1RCK8#PHI:1477#GzHMG009#5518#Fusarium_graminearum#unaffected_pathogenicity	48.571	2.89e-18	88.6
g2522.t1	B1GVX7#PHI:2290#BcBOA6#40559#Botrytis_cinerea#reduced_virulence	48.556	0	1218
g6973.t1	P03962#PHI:506#URA3#4932#Saccharomyces_cerevisiae#reduced_virulence	48.551	2.73e-34	128
g12410.t1	Q874K8#PHI:286#CLC-A#5207#Cryptococcus_neoformans#reduced_virulence	48.542	0	733
g3391.t1	Q520U5#PHI:2082#Moatg16#318829#Magnaporthe_oryzae#loss_of_pathogenicity	48.529	2.17e-57	181
g8359.t1	Q99324#PHI:191#TOM1#39703#Septoria_lycopersici#unaffected_pathogenicity	48.521	1.03e-161	481
g8761.t1	I1RG94#PHI:1322#GzbZIP004#5518#Fusarium_graminearum#unaffected_pathogenicity	48.485	6.52e-83	258
g11772.t1	Q6FM61#PHI:2570#CYB2#5478#Candida_glabrata#reduced_virulence	48.485	6.1e-13	63.2
g8892.t1	J5JMB3#PHI:6746#Mdj1#176275#Beauveria_bassiana#reduced_virulence	48.485	1.85e-11	65.5
g6175.t1	I1RHQ1#PHI:7651#FgPR-IL-4#5518#Fusarium_graminearum#reduced_virulence	48.438	5.28e-62	196
g8730.t1	Q04701#PHI:179#PELA#140110#Nectria_haematococca#reduced_virulence	48.425	1.08e-68	214
g240.t1	Q5AJ90#PHI:3688#Fox3p#5476#Candida_albicans#unaffected_pathogenicity	48.418	3.49e-119	367
g731.t1	G4MRV1#PHI:873#MGG_02443#318829#Magnaporthe_oryzae#reduced_virulence	48.394	0	829
g2068.t1	I1RCV8#PHI:5786#Fgsg01440#5518#Fusarium_graminearum#unaffected_pathogenicity	48.387	4.82e-36	127
g3906.t1	Q5K6X5#PHI:6297#CDC50#5207#Cryptococcus_neoformans#reduced_virulence	48.354	1.5e-122	365
g12312.t1	F8SM03#PHI:2179#Moplaa#318829#Magnaporthe_oryzae#reduced_virulence	48.276	7.88e-168	498
g5699.t1	I1RD96#PHI:3984#FGSG_01588_(Sc_gpi7)#5518#Fusarium_graminearum#unaffected_pathogenicity	48.246	7.3e-20	90.5
g8367.t1	Q4WHH1#PHI:2547#ESF1#746128#Aspergillus_fumigatus#lethal	48.24	7.88e-156	471
g12831.t1	D2SZX8#PHI:2838#TOX9#5016#Bipolaris_maydis#reduced_virulence	48.214	1.78e-11	58.2
g754.t1	Q9UW03#PHI:202__PHI:1160__PHI:2309#BcatrB#40559#Botrytis_cinerea#unaffected_pathogenicity__reduced_virulence__chemistry_target:_sensitivity_to_chemical	48.207	0	1310
g5583.t1	I1S7J0#PHI:1819#GzZC134#5518#Fusarium_graminearum#unaffected_pathogenicity	48.207	2.6e-72	238
g8376.t1	I1S2C4#PHI:5068#MCC#5518#Fusarium_graminearum#reduced_virulence	48.193	1.22e-46	165
g8623.t1	Q5AAI8#PHI:4045#Nap1#5476#Candida_albicans#reduced_virulence	48.187	2.04e-106	323
g5129.t1	G4MTK9#PHI:4885#MoYpd1p#318829#Magnaporthe_oryzae#loss_of_pathogenicity	48.175	2.69e-34	119
g12475.t1	I1RDG6#PHI:1555#GzMyb019#5518#Fusarium_graminearum#unaffected_pathogenicity	48.155	5.28e-168	493
g1565.t1	Q51ZN8#PHI:2070#Moatg2#318829#Magnaporthe_oryzae#loss_of_pathogenicity	48.135	0	1767
g10012.t1	C6ZRH8#PHI:2976#CgOPT1#474922#Colletotrichum_gloeosporioides#reduced_virulence	48.112	0	709
g1033.t1	I1S2F6#PHI:1460#GzAra008#5518#Fusarium_graminearum#unaffected_pathogenicity	48.077	2.14e-10	56.6
g11706.t1	A0A1C3YMS1#PHI:5868#Fgsg12463#5518#Fusarium_graminearum#unaffected_pathogenicity	48.071	2.54e-97	297
g11360.t1	A0A098DM90#PHI:5864#GCD12#5518#Fusarium_graminearum#unaffected_pathogenicity	48.069	3.38e-141	416
g6325.t1	G4NE79#PHI:6928#MoBRE1#318829#Magnaporthe_oryzae#reduced_virulence	48.057	0	716
g368.t1	F5B5Y4#PHI:6206#BbCypC#176275#Beauveria_bassiana#unaffected_pathogenicity	48.052	1.16e-45	159
g11848.t1	P15801#PHI:505#MIP1#4932#Saccharomyces_cerevisiae#reduced_virulence	48.047	0	959
g4648.t1	I1R9Z0#PHI:1469#GzHMG001#5518#Fusarium_graminearum#unaffected_pathogenicity	48.025	0	606
g6094.t1	A0A0F6AZ26#PHI:7212#STM14_1003#28901#Salmonella_enterica#reduced_virulence	47.937	2.85e-84	260
g5608.t1	G4NB64#PHI:4110#MoVOSA#318829#Magnaporthe_oryzae#unaffected_pathogenicity	47.926	2.89e-53	187
g11436.t1	I1RQI0#PHI:1975#GzZC290#5518#Fusarium_graminearum#unaffected_pathogenicity	47.908	1.71e-141	420
g3724.t1	I1RX03#PHI:3985#FGSG_08844_(Sc_gpi7)#5518#Fusarium_graminearum#unaffected_pathogenicity	47.903	0	590
g9221.t1	G4N402#PHI:2107#MGG_05905.5#318829#Magnaporthe_oryzae#unaffected_pathogenicity__reduced_virulence	47.903	3.56e-171	501
g3633.t1	I1RL97#PHI:1862#GzZC177#5518#Fusarium_graminearum#unaffected_pathogenicity	47.826	1.61e-173	512
g12129.t1	A7F946#PHI:2411#Ss-ggt1#5180#Sclerotinia_sclerotiorum#reduced_virulence	47.809	2.26e-74	246
g8416.t1	Q9P8L8#PHI:544#BCMFS1#40559#Botrytis_cinerea#unaffected_pathogenicity	47.736	9.62e-178	519
g2800.t1	I1S0W0#PHI:1417#GzC2H084#5518#Fusarium_graminearum#unaffected_pathogenicity	47.674	1.11e-15	75.5
g4740.t1	G1X666#PHI:8036#AoRab-2_(AOL_s00054g360)#13349#Arthrobotrys_oligospora#unaffected_pathogenicity	47.656	1.64e-30	116
g1687.t1	A0A0A2JY92#PHI:7666#LysM3#27334#Penicillium_expansum#effector_(plant_avirulence_determinant)	47.656	4.37e-29	119
g3049.t1	I1SAN0#PHI:1528#GzHOMEL041#5518#Fusarium_graminearum#unaffected_pathogenicity	47.619	0	828
g3668.t1	A0A1C3YMS1#PHI:5868#Fgsg12463#5518#Fusarium_graminearum#unaffected_pathogenicity	47.592	2.01e-107	325
g11208.t1	G1UAE0#PHI:242#CaTPS2#5476#Candida_albicans#reduced_virulence	47.573	0	745
g2935.t1	Q0E4W1#PHI:6181#Bcmimp1#40559#Botrytis_cinerea#unaffected_pathogenicity	47.552	3.22e-78	249
g2617.t1	I1S0H5#PHI:7717#FgOXP1#5518#Fusarium_graminearum#reduced_virulence	47.536	0	1173
g814.t1	Q4UUL4#PHI:3945#XC_2203#339#Xanthomonas_campestris#reduced_virulence	47.482	2.16e-38	132
g5604.t1	I1RQS2#PHI:1327#GzbZIP009#5518#Fusarium_graminearum#unaffected_pathogenicity	47.478	1.95e-146	439
g5772.t1	G4MSQ8#PHI:5686#FZC82#318829#Magnaporthe_oryzae#unaffected_pathogenicity	47.472	0	608
g2954.t1	G4NAJ8#PHI:6223#MoYvh1#318829#Magnaporthe_oryzae#reduced_virulence	47.47	2.41e-114	345
g5919.t1	D2E9X0#PHI:2379#DEP5#29001#Alternaria_brassicicola#reduced_virulence__unaffected_pathogenicity	47.459	0	1154
g4988.t1	A0A290WFC9#PHI:7708#VEDA_05198#27337#Verticillium_dahliae#reduced_virulence__unaffected_pathogenicity__increased_virulence_(hypervirulence)	47.447	1.79e-99	300
g10568.t1	Q4WF54#PHI:2322#SidH#746128#Aspergillus_fumigatus#reduced_virulence	47.426	1.71e-88	267
g602.t1	I1RXH8#PHI:1513#GzHOME011#5518#Fusarium_graminearum#unaffected_pathogenicity	47.416	4.83e-128	404
g6048.t1	I1RHS3#PHI:5852#Fgsg03336#5518#Fusarium_graminearum#unaffected_pathogenicity	47.407	5.05e-31	122
g2893.t1	G4NJD1#PHI:2171#Peroxisomal_copper_amine_oxidase#318829#Magnaporthe_oryzae#reduced_virulence	47.345	0	622
g8845.t1	Q6FM27#PHI:3793#ANP1#5478#Candida_glabrata#increased_virulence_(hypervirulence)	47.239	1.94e-102	311
g3233.t1	I1RMA5#PHI:4041#spt3#5518#Fusarium_graminearum#reduced_virulence	47.232	5.27e-71	225
g1899.t1	Q5A1L6#PHI:3822#GIT3#5476#Candida_albicans#reduced_virulence	47.216	1.76e-146	434
g8465.t1	G2XD68#PHI:8858#VdSSEP1_(VDAG-08100)#27337#Verticillium_dahliae#reduced_virulence	47.212	4.1e-63	226
g4370.t1	G5EI55#PHI:2154#RBP35#318829#Magnaporthe_oryzae#reduced_virulence	47.186	5.07e-54	186
g4949.t1	G4N740#PHI:4024#MoST1#318829#Magnaporthe_oryzae#unaffected_pathogenicity	47.148	6.72e-159	467
g4800.t1	A0A1C3YJ97#PHI:5796#Fgsg02569#5518#Fusarium_graminearum#unaffected_pathogenicity	47.148	5.25e-85	267
g6040.t1	Q4WNQ3#PHI:8876#gefB_(Afu4g06570)#746128#Aspergillus_fumigatus#unaffected_pathogenicity__loss_of_pathogenicity	47.126	0	978
g10497.t1	I1RYV5#PHI:1514#GzHOME012#5518#Fusarium_graminearum#unaffected_pathogenicity	47.123	0	613
g10168.t1	A0A0F6AZ29#PHI:7216#STM14_1007#28901#Salmonella_enterica#reduced_virulence	47.122	0	528
g10524.t1	Q6IZ77#PHI:3909#ZrfB#746128#Aspergillus_fumigatus#reduced_virulence__loss_of_pathogenicity	47.11	9.58e-95	288
g2112.t1	F9X9S4#PHI:4944#KU80#1047171#Zymoseptoria_tritici#unaffected_pathogenicity	47.083	0	676
g2187.t1	J9VNI6#PHI:7178#Ape4#5207#Cryptococcus_neoformans#reduced_virulence	47.082	6.37e-161	473
g3953.t1	G4N0U1#PHI:2134#MoHox5#318829#Magnaporthe_oryzae#reduced_virulence	47.076	7.69e-147	446
g9672.t1	I1S4X3#PHI:1843#GzZC158#5518#Fusarium_graminearum#unaffected_pathogenicity	47.059	1.26e-140	432
g2379.t1	J9VQL2#PHI:3529#VTC4#5207#Cryptococcus_neoformans#increased_virulence_(hypervirulence)	47.009	6.21e-30	114
g9145.t1	H8ZZ79#PHI:2710#mepB#474922#Colletotrichum_gloeosporioides#reduced_virulence	46.988	4.11e-123	368
g12182.t1	Q4WNM3#PHI:2552#NOP4#746128#Aspergillus_fumigatus#lethal	46.972	0	594
g11259.t1	Q5NEU6#PHI:4733#dnaJ#263#Francisella_tularensis#unaffected_pathogenicity	46.97	5.2e-11	60.1
g5833.t1	I1RM25#PHI:1579#GzOB019#5518#Fusarium_graminearum#unaffected_pathogenicity	46.951	0	600
g6680.t1	I1RDG6#PHI:1555#GzMyb019#5518#Fusarium_graminearum#unaffected_pathogenicity	46.931	1.94e-167	503
g6453.t1	Q9P4U9#PHI:2832#AKT3-1#5599#Alternaria_alternata#loss_of_pathogenicity	46.931	5.85e-79	244
g6387.t1	P0CT09#PHI:7223#Moend3#318829#Magnaporthe_oryzae#reduced_virulence	46.914	4.94e-14	74.7
g75.t1	I1R980#PHI:2393#(O-methylsterigmatocystin_oxidoreductase)#5518#Fusarium_graminearum#increased_virulence_(hypervirulence)	46.888	2.09e-155	454
g995.t1	A0A0D5BX39#PHI:4750#ChPMA2#80884#Colletotrichum_higginsianum#loss_of_pathogenicity	46.875	0	839
g7192.t1	O59928#PHI:144#CHT42#29875#Trichoderma_virens#reduced_virulence	46.867	8.2e-128	378
g5839.t1	G4MSF9#PHI:8754#MoPer1_(MGG_04527)#318829#Magnaporthe_oryzae#reduced_virulence	46.849	1.01e-107	322
g4054.t1	I1RTH7#PHI:1890#GzZC205#5518#Fusarium_graminearum#unaffected_pathogenicity	46.845	0	575
g4451.t1	I1RUV3#PHI:1861#GzZC176#5518#Fusarium_graminearum#unaffected_pathogenicity	46.833	1.34e-133	418
g2286.t1	I1RKH7#PHI:1482#GzHMG014#5518#Fusarium_graminearum#unaffected_pathogenicity	46.814	1.96e-79	249
g723.t1	G4MPA8#PHI:890#MGG_07015#318829#Magnaporthe_oryzae#reduced_virulence	46.805	0	546
g103.t1	Q9Y885#PHI:157#TOXF#5017#Bipolaris_zeicola#loss_of_pathogenicity	46.802	3.2e-102	309
g4102.t1	A0A0R1BRS8#PHI:6090#katE#106654#Acinetobacter_nosocomialis#increased_virulence_(hypervirulence)	46.785	0	608
g3557.t1	Q4WPS9#PHI:7457#RamA#746128#Aspergillus_fumigatus#reduced_virulence	46.753	1.04e-57	197
g8945.t1	I1RM25#PHI:1579#GzOB019#5518#Fusarium_graminearum#unaffected_pathogenicity	46.699	0	771
g3718.t1	Q96WM9#PHI:552#BcLCC2#40559#Botrytis_cinerea#unaffected_pathogenicity	46.667	4.91e-176	514
g12309.t1	G4NEK6#PHI:2029#TGL2#318829#Magnaporthe_oryzae#unaffected_pathogenicity	46.667	2.18e-55	184
g5821.t1	G1X666#PHI:8036#AoRab-2_(AOL_s00054g360)#13349#Arthrobotrys_oligospora#unaffected_pathogenicity	46.64	1.94e-71	220
g6078.t1	Q4X1B0#PHI:6444#Complex_I_NADH_oxidoredutase#746128#Aspergillus_fumigatus#reduced_virulence	46.64	2.61e-63	200
g10387.t1	I1S3J7#PHI:1424#GzC2H092#5518#Fusarium_graminearum#unaffected_pathogenicity	46.617	3.13e-29	112
g2201.t1	Q4WYE4#PHI:7168#crpA#746128#Aspergillus_fumigatus#reduced_virulence	46.598	0	846
g2373.t1	G4MUI1#PHI:790#MGG_07259#318829#Magnaporthe_oryzae#reduced_virulence	46.548	5.02e-130	388
g2907.t1	Q8X116#PHI:540__PHI:1029#BCPME2__bcpme2#40559#Botrytis_cinerea#unaffected_pathogenicity	46.505	5.34e-92	281
g7436.t1	G4N6I1#PHI:5692#FZC87#318829#Magnaporthe_oryzae#unaffected_pathogenicity	46.419	5.6e-99	300
g10560.t1	J4USC3#PHI:6471#Trr2#176275#Beauveria_bassiana#reduced_virulence	46.405	4.81e-80	248
g10797.t1	E7Q5D7#PHI:5043#Hsp150p#4932#Saccharomyces_cerevisiae#increased_virulence_(hypervirulence)	46.392	2.6e-21	93.2
g2100.t1	Q4WES1#PHI:2550#NOB1#746128#Aspergillus_fumigatus#lethal	46.38	1.45e-128	382
g467.t1	G4NGB1#PHI:3311__PHI:5661#pcf1__PCF1#318829#Magnaporthe_oryzae#reduced_virulence	46.37	0	561
g1348.t1	J9VNE4#PHI:7828#Uxt1#5207#Cryptococcus_neoformans#reduced_virulence__unaffected_pathogenicity	46.341	4.36e-77	244
g6934.t1	P0A038#PHI:6904#GAPDH#1280#Staphylococcus_aureus#reduced_virulence	46.291	3.37e-96	291
g10108.t1	P04046#PHI:502#ADE4#4932#Saccharomyces_cerevisiae#reduced_virulence	46.286	1.06e-141	434
g6268.t1	I1S0N5#PHI:1552#GzMyb016#5518#Fusarium_graminearum#unaffected_pathogenicity	46.281	1.87e-138	456
g671.t1	Q9C2Y4#PHI:405#PDE1#318829#Magnaporthe_oryzae#reduced_virulence	46.28	0	1179
g3390.t1	B8NKR0#PHI:7316#dot1#5059#Aspergillus_flavus#reduced_virulence	46.278	1.47e-120	365
g132.t1	I1R9R2#PHI:1996#GzZC311#5518#Fusarium_graminearum#unaffected_pathogenicity	46.277	0	589
g1909.t1	I1RHH3#PHI:1908#GzZC223#5518#Fusarium_graminearum#unaffected_pathogenicity	46.269	3.25e-116	355
g769.t1	I1RPI0#PHI:1640#GzWing012#5518#Fusarium_graminearum#unaffected_pathogenicity	46.262	1.76e-100	308
g5533.t1	G4N9C8#PHI:2173#NMR1#318829#Magnaporthe_oryzae#reduced_virulence	46.23	1.7e-87	267
g4188.t1	I1RIS2#PHI:5353#Famfs1#282267#Fusarium_asiaticum#reduced_virulence	46.226	3.39e-57	201
g7955.t1	A0A1C3YI15#PHI:5833#Fgsg00994#5518#Fusarium_graminearum#unaffected_pathogenicity	46.212	1.47e-76	243
g8318.t1	G4MNQ6#PHI:6638#Modnm2#318829#Magnaporthe_oryzae#unaffected_pathogenicity	46.209	2.29e-109	353
g5035.t1	Q4WF54#PHI:2322#SidH#746128#Aspergillus_fumigatus#reduced_virulence	46.154	3.43e-80	246
g4583.t1	Q2FID9#PHI:3348#nfu#1280#Staphylococcus_aureus#reduced_virulence	46.154	7.8e-11	58.9
g5004.t1	G4NAW7#PHI:5689#FZC84#318829#Magnaporthe_oryzae#unaffected_pathogenicity	46.121	0	547
g3023.t1	I1S9G1#PHI:1435#GzC2H104#5518#Fusarium_graminearum#unaffected_pathogenicity	46.105	1.47e-126	398
g5052.t1	G4NAT7#PHI:3811#TDG4#318829#Magnaporthe_oryzae#reduced_virulence	46.095	2.76e-180	546
g6631.t1	I1RQU2#PHI:1964#GzZC279#5518#Fusarium_graminearum#unaffected_pathogenicity	46.089	2.97e-137	407
g12648.t1	I1RC95#PHI:1566#GzOB006#5518#Fusarium_graminearum#lethal	46.082	5.5e-102	312
g11041.t1	Q59RB8#PHI:477#ICL1#5476#Candida_albicans#reduced_virulence	46.067	1.07e-170	499
g7852.t1	F6K8L7#PHI:2842#CnSFH5#5207#Cryptococcus_neoformans#unaffected_pathogenicity__reduced_virulence	46.067	8.98e-72	229
g484.t1	Q0V515#PHI:3914#Sdh1#13684#Parastagonospora_nodorum#reduced_virulence	46.029	1.05e-143	425
g12326.t1	J9VNZ8#PHI:3528#PHO89#5207#Cryptococcus_neoformans#reduced_virulence	46.013	0	528
g12849.t1	Q8TG07#PHI:3600#plb1#5478#Candida_glabrata#unaffected_pathogenicity	45.993	9.61e-168	499
g9139.t1	I1S3J7#PHI:1424#GzC2H092#5518#Fusarium_graminearum#unaffected_pathogenicity	45.979	3.17e-129	408
g7289.t1	A0A1C3YL50#PHI:5839#Fgsg07489#5518#Fusarium_graminearum#unaffected_pathogenicity	45.972	5.04e-120	358
g1372.t1	I1RRB9#PHI:1229#FGSG_06637#5518#Fusarium_graminearum#lethal	45.971	3.89e-133	404
g8080.t1	I1RC95#PHI:1566#GzOB006#5518#Fusarium_graminearum#lethal	45.968	1.45e-103	323
g7689.t1	Q6FM61#PHI:2570#CYB2#5478#Candida_glabrata#reduced_virulence	45.946	3.63e-34	127
g9822.t1	G4MKH9#PHI:3310#Mocod1#318829#Magnaporthe_oryzae#reduced_virulence	45.899	0	615
g5149.t1	H8ZZ79#PHI:2710#mepB#474922#Colletotrichum_gloeosporioides#reduced_virulence	45.889	4.47e-111	337
g4303.t1	Q5D1P9#PHI:481#KLAP1#27357#Colletotrichum_acutatum#unaffected_pathogenicity__loss_of_pathogenicity	45.827	2.59e-131	405
g4751.t1	I1RB89#PHI:1474#GzHMG006#5518#Fusarium_graminearum#unaffected_pathogenicity	45.806	0	624
g1916.t1	A0A1C3YMM2#PHI:5872#Fgsg02853#5518#Fusarium_graminearum#unaffected_pathogenicity	45.788	2.12e-67	229
g3382.t1	G4N5N0#PHI:5441#ABA_GPCR#318829#Magnaporthe_oryzae#unaffected_pathogenicity	45.783	1.19e-16	73.9
g12188.t1	C5BF98#PHI:2959#mdh#67780#Edwardsiella_ictaluri#reduced_virulence	45.687	1.58e-75	237
g4755.t1	I1S4Q8#PHI:1654#GzWing027#5518#Fusarium_graminearum#unaffected_pathogenicity	45.687	1.61e-56	196
g4077.t1	G2WY50#PHI:4909#VdQase#27337#Verticillium_dahliae#reduced_virulence	45.64	5.56e-103	328
g9156.t1	Q7Z8E8#PHI:419#CSH1#5476#Candida_albicans#reduced_virulence	45.619	2.47e-90	276
g5893.t1	Q5AND9#PHI:7009#arf2#5476#Candida_albicans#reduced_virulence	45.614	5.3e-22	94.7
g5323.t1	G4N492#PHI:2030#TGL3-1#318829#Magnaporthe_oryzae#unaffected_pathogenicity	45.543	0	562
g7887.t1	G2X8Y4#PHI:7741#FreB#27337#Verticillium_dahliae#reduced_virulence	45.525	8.74e-152	453
g1875.t1	I1RV04#PHI:1814#GzZC129#5518#Fusarium_graminearum#lethal	45.52	3.18e-178	554
g3769.t1	C0NFK7#PHI:6265#Eng1#5037#Histoplasma_capsulatum#reduced_virulence	45.515	3.18e-78	245
g10312.t1	J9VW42#PHI:7944#Uut1_(CNAG_06230)#5207#Cryptococcus_neoformans#loss_of_pathogenicity	45.515	1.08e-70	233
g7863.t1	G4MQA4#PHI:5647#FZC50#318829#Magnaporthe_oryzae#unaffected_pathogenicity	45.513	2.09e-115	367
g9613.t1	B0XVQ6#PHI:7335#pksP#746128#Aspergillus_fumigatus#unaffected_pathogenicity	45.484	0	1920
g11131.t1	I1S0N5#PHI:1552#GzMyb016#5518#Fusarium_graminearum#unaffected_pathogenicity	45.455	2.85e-117	399
g12427.t1	A0A0F6AZ25#PHI:7211#STM14_1002#28901#Salmonella_enterica#reduced_virulence	45.455	4.26e-71	222
g10415.t1	J9VHR2#PHI:8615#Grx4_(CNAG_02950)#5207#Cryptococcus_neoformans#loss_of_pathogenicity	45.455	2.11e-23	95.9
g2694.t1	O59937#PHI:569#XYL3#5507#Fusarium_oxysporum#unaffected_pathogenicity	45.455	1.21e-10	62
g1981.t1	Q32WF7#PHI:2269#Mdh1#13684#Parastagonospora_nodorum#unaffected_pathogenicity	45.418	2.49e-69	218
g5586.t1	G4NC17#PHI:5185#MoAPX1#318829#Magnaporthe_oryzae#reduced_virulence	45.404	1.68e-157	461
g2298.t1	Q6FV98#PHI:6626#CgTpo1_2#5478#Candida_glabrata#reduced_virulence	45.392	1.47e-159	473
g7042.t1	G4NAT7#PHI:3811#TDG4#318829#Magnaporthe_oryzae#reduced_virulence	45.389	0	579
g8017.t1	Q6X269#PHI:338#CLB2#5270#Ustilago_maydis#reduced_virulence	45.349	1.1e-75	255
g8737.t1	G4N1P8#PHI:5440#ABA4#318829#Magnaporthe_oryzae#reduced_virulence	45.344	7.96e-67	210
g10075.t1	Q99174#PHI:2849#cutA#169388#Fusarium_solani#unaffected_pathogenicity	45.339	1.5e-66	208
g6137.t1	D7UQ40#PHI:3347#sol5#48100#Alternaria_solani#unaffected_pathogenicity	45.312	3.74e-10	55.8
g7657.t1	E3KNM7#PHI:3998#Pgt-IaaM#5297#Puccinia_graminis#reduced_virulence	45.272	1.39e-146	435
g4182.t1	I1REN7#PHI:1681#GzNF001#5518#Fusarium_graminearum#unaffected_pathogenicity	45.23	1.24e-136	466
g10616.t1	A0A151V4F3#PHI:6391#CDA2#318829#Magnaporthe_oryzae#unaffected_pathogenicity	45.217	1.37e-59	199
g8420.t1	B0YAP6#PHI:2297#tmpL#746128#Aspergillus_fumigatus#reduced_virulence	45.217	1.4e-46	166
g10577.t1	G4NFU3#PHI:2103#MGG_08710.5#318829#Magnaporthe_oryzae#unaffected_pathogenicity	45.161	1.78e-19	86.7
g3949.t1	P95830#PHI:6986#DnaJ#1313#Streptococcus_pneumoniae#reduced_virulence	45.161	5.41e-11	59.7
g10545.t1	Q51Y68#PHI:2083#Moatg17#318829#Magnaporthe_oryzae#loss_of_pathogenicity	45.155	7.18e-131	393
g6707.t1	Q96WM9#PHI:552#BcLCC2#40559#Botrytis_cinerea#unaffected_pathogenicity	45.111	5.33e-163	480
g5155.t1	I1S0X3#PHI:1776#GzZC091#5518#Fusarium_graminearum#unaffected_pathogenicity	45.082	5.73e-117	350
g7133.t1	M1WES1#PHI:6267__PHI:8120#cpipt-log__ipt-log_(cpur_04177)#5111#Claviceps_purpurea#reduced_virulence__loss_of_pathogenicity__unaffected_pathogenicity	45.045	9.47e-55	184
g11678.t1	A0A151V4F3#PHI:6391#CDA2#318829#Magnaporthe_oryzae#unaffected_pathogenicity	45.037	9.38e-138	414
g420.t1	I1RC95#PHI:1566#GzOB006#5518#Fusarium_graminearum#lethal	44.985	8.6e-96	300
g12614.t1	I1S2J9#PHI:3924__PHI:8224__PHI:9036#FgABC1__Fg10995__fgm5_(FGSG_10995)#5518#Fusarium_graminearum#reduced_virulence	44.976	0	1185
g10754.t1	G4MPP9#PHI:885#MGG_02240#318829#Magnaporthe_oryzae#reduced_virulence	44.969	6.04e-127	421
g8570.t1	Q5ADN1#PHI:6074#Tpd3#5476#Candida_albicans#reduced_virulence	44.961	0	536
g12302.t1	Q32WF7#PHI:2269#Mdh1#13684#Parastagonospora_nodorum#unaffected_pathogenicity	44.944	9.02e-76	235
g7071.t1	A0A384JRT5#PHI:8606#BcXyl1#40559#Botrytis_cinerea#reduced_virulence	44.928	6.75e-47	173
g5143.t1	C6ZRH8#PHI:2976#CgOPT1#474922#Colletotrichum_gloeosporioides#reduced_virulence	44.895	0	639
g1495.t1	A0A098DM90#PHI:5864#GCD12#5518#Fusarium_graminearum#unaffected_pathogenicity	44.772	6.43e-114	342
g10267.t1	G4MS03#PHI:2006__PHI:2008#HST1#318829#Magnaporthe_oryzae#unaffected_pathogenicity	44.755	7.83e-35	135
g8096.t1	Q96VB3#PHI:509#AFT3#5599#Alternaria_alternata#loss_of_pathogenicity	44.751	3.78e-49	166
g9475.t1	B5DBZ7#PHI:1040#Lmgpi15#5022#Leptosphaeria_maculans#reduced_virulence	44.712	6.94e-44	148
g12258.t1	U6ZIB1#PHI:7624#Vfme#1089444#Dickeya_solani#reduced_virulence__unaffected_pathogenicity	44.674	2.08e-70	244
g8317.t1	J9VMW8#PHI:3457#PHO84#5207#Cryptococcus_neoformans#reduced_virulence	44.64	2.14e-149	450
g3912.t1	G4NDI1#PHI:8523#MoYPEL1_(MGG_06263.7)#318829#Magnaporthe_oryzae#reduced_virulence__loss_of_pathogenicity	44.635	4.98e-52	172
g8987.t1	A7EU07#PHI:4508#Ss-odc1#5180#Sclerotinia_sclerotiorum#unaffected_pathogenicity	44.628	4.18e-113	344
g9089.t1	Q9Y7G8#PHI:407#PBC1#76659#Pyrenopeziza_brassicae#loss_of_pathogenicity	44.624	5.77e-45	153
g5719.t1	I1RG47#PHI:1942#GzZC257#5518#Fusarium_graminearum#unaffected_pathogenicity	44.617	0	623
g1970.t1	G4YQK3#PHI:6261#PsAAT3#67593#Phytophthora_sojae#reduced_virulence	44.604	8.97e-107	337
g6564.t1	I1S353#PHI:1778#GzZC093#5518#Fusarium_graminearum#unaffected_pathogenicity	44.597	1.71e-160	473
g10219.t1	Q5AMP3#PHI:7011#arl1#5476#Candida_albicans#reduced_virulence	44.571	1.29e-42	143
g11476.t1	I1S0N5#PHI:1552#GzMyb016#5518#Fusarium_graminearum#unaffected_pathogenicity	44.561	1.34e-73	261
g6440.t1	Q59X38#PHI:2823#PES1#5476#Candida_albicans#reduced_virulence	44.553	1.02e-136	416
g8467.t1	G4ZHR2#PHI:6868#PsXEG1#67593#Phytophthora_sojae#effector_(plant_avirulence_determinant)	44.545	3.25e-56	182
g8001.t1	G1UA02#PHI:2819#CaEss1#5476#Candida_albicans#reduced_virulence	44.509	5.53e-49	159
g1083.t1	J9N257#PHI:2284__PHI:3438#Msb2#5507#Fusarium_oxysporum#reduced_virulence__loss_of_pathogenicity__unaffected_pathogenicity	44.457	3.61e-166	521
g1766.t1	C5BAT0#PHI:2961#gcvP#67780#Edwardsiella_ictaluri#reduced_virulence	44.444	0	795
g2292.t1	I1RL30#PHI:1094#FGSG_04610#5518#Fusarium_graminearum#unaffected_pathogenicity	44.444	5.72e-12	60.5
g295.t1	G2XD68#PHI:8858#VdSSEP1_(VDAG-08100)#27337#Verticillium_dahliae#reduced_virulence	44.432	0	707
g3836.t1	I1S389#PHI:1781#GzZC096#5518#Fusarium_graminearum#unaffected_pathogenicity	44.412	0	571
g7196.t1	A0A0F6AZ27#PHI:7214#STM14_1005#28901#Salmonella_enterica#reduced_virulence	44.359	1.42e-109	331
g10288.t1	G4NDE1#PHI:1017__PHI:2067#ABC4#318829#Magnaporthe_oryzae#reduced_virulence__loss_of_pathogenicity	44.338	0	644
g10576.t1	G4NFU3#PHI:2103#MGG_08710.5#318829#Magnaporthe_oryzae#unaffected_pathogenicity	44.311	4.52e-39	149
g11137.t1	G4MQQ3#PHI:3065#MoRga5#318829#Magnaporthe_oryzae#unaffected_pathogenicity	44.2	0	614
g8806.t1	I1RC95#PHI:1566#GzOB006#5518#Fusarium_graminearum#lethal	44.194	4.32e-86	271
g3796.t1	G4NEE4#PHI:4111#MoVELC#318829#Magnaporthe_oryzae#reduced_virulence	44.134	1.53e-40	153
g1843.t1	Q8TG07#PHI:3600#plb1#5478#Candida_glabrata#unaffected_pathogenicity	44.133	2.94e-145	455
g12168.t1	E3QNW8#PHI:6228#KRE6#31870#Colletotrichum_graminicola#reduced_virulence	44.075	3.19e-123	371
g2644.t1	B0LLU1#PHI:1134#ipa#5022#Leptosphaeria_maculans#increased_virulence_(hypervirulence)	44.07	0	580
g5982.t1	Q32WF7#PHI:2269#Mdh1#13684#Parastagonospora_nodorum#unaffected_pathogenicity	44.043	4.59e-71	222
g10785.t1	I1RM25#PHI:1579#GzOB019#5518#Fusarium_graminearum#unaffected_pathogenicity	44.025	9.57e-39	142
g12816.t1	I1RTH7#PHI:1890#GzZC205#5518#Fusarium_graminearum#unaffected_pathogenicity	44.024	1e-165	508
g11229.t1	G5EHQ9#PHI:2174#NMR2#318829#Magnaporthe_oryzae#reduced_virulence	44.013	2.87e-90	274
g1892.t1	G4N1P8#PHI:5440#ABA4#318829#Magnaporthe_oryzae#reduced_virulence	44	1e-60	195
g8213.t1	I1RBT2#PHI:1347#GzC2H007#5518#Fusarium_graminearum#reduced_virulence	43.99	2.36e-92	299
g1124.t1	Q32WF7#PHI:2269#Mdh1#13684#Parastagonospora_nodorum#unaffected_pathogenicity	43.985	1.4e-69	218
g8470.t1	I1S2K0#PHI:9044#FGSG_10996#5518#Fusarium_graminearum#unaffected_pathogenicity	43.966	3.23e-153	460
g8256.t1	Q2LK92#PHI:548__PHI:2305#BcPIC5__BcFKBP12#40559#Botrytis_cinerea#reduced_virulence__unaffected_pathogenicity__increased_virulence_(hypervirulence)	43.966	9.45e-19	82.4
g10882.t1	Q3Y5V5#PHI:1018__PHI:2042#ABC3#318829#Magnaporthe_oryzae#loss_of_pathogenicity	43.915	6.8e-37	149
g11966.t1	Q4WUL6#PHI:362__PHI:2520#LYSF__LYS4#746128#Aspergillus_fumigatus#loss_of_pathogenicity__lethal	43.902	9.14e-34	126
g11724.t1	I1SA30#PHI:1436#GzC2H105#5518#Fusarium_graminearum#reduced_virulence	43.881	9.46e-79	259
g10430.t1	I1S578#PHI:1731#GzZC046#5518#Fusarium_graminearum#unaffected_pathogenicity	43.812	3.69e-100	311
g7664.t1	Q4WQ27#PHI:2519#LYS9#746128#Aspergillus_fumigatus#lethal	43.792	6.26e-110	333
g4796.t1	Q882F5#PHI:7788#AldB_(PSPTO_2673)#317#Pseudomonas_syringae#reduced_virulence	43.776	1.5e-132	396
g136.t1	Q4WJR9#PHI:6554#sB#746128#Aspergillus_fumigatus#unaffected_pathogenicity	43.758	0	659
g87.t1	I1S0N5#PHI:1552#GzMyb016#5518#Fusarium_graminearum#unaffected_pathogenicity	43.73	2.81e-71	261
g9523.t1	F6K8L6#PHI:2841#CnSEC14-2#5207#Cryptococcus_neoformans#unaffected_pathogenicity	43.726	1.93e-64	207
g3079.t1	G4MWP4#PHI:5624#FZC30#318829#Magnaporthe_oryzae#unaffected_pathogenicity	43.713	9.09e-174	533
g11924.t1	C3PTB1#PHI:2834#LAM1#5016#Bipolaris_maydis#reduced_virulence	43.697	5.02e-136	408
g2777.t1	Q99324#PHI:191#TOM1#39703#Septoria_lycopersici#unaffected_pathogenicity	43.686	0	564
g11458.t1	G4MNA5#PHI:2096#Calcium-transporting_ATPase_3#318829#Magnaporthe_oryzae#loss_of_pathogenicity	43.67	0	829
g3533.t1	Q9P8L8#PHI:544#BCMFS1#40559#Botrytis_cinerea#unaffected_pathogenicity	43.649	7.46e-168	493
g8275.t1	M1WES1#PHI:6267__PHI:8120#cpipt-log__ipt-log_(cpur_04177)#5111#Claviceps_purpurea#reduced_virulence__loss_of_pathogenicity__unaffected_pathogenicity	43.646	5.67e-41	145
g4156.t1	Q00903#PHI:24#Avenacinase#29850#Gaeumannomyces_graminis#unaffected_pathogenicity__loss_of_pathogenicity	43.602	0	590
g6639.t1	I1RN20#PHI:1373#GzC2H036#5518#Fusarium_graminearum#unaffected_pathogenicity	43.59	1.4e-15	77.8
g6728.t1	I1RLF1#PHI:1980#GzZC295#5518#Fusarium_graminearum#unaffected_pathogenicity	43.564	9.57e-23	92.4
g2790.t1	I1R9D4#PHI:2000#GzZC315#5518#Fusarium_graminearum#unaffected_pathogenicity	43.531	3.34e-165	487
g8968.t1	I1RP41#PHI:5828#GIV6#5518#Fusarium_graminearum#unaffected_pathogenicity	43.519	5.2e-53	181
g6951.t1	Q4WV27#PHI:7755__PHI:8601#cofilin_(AFUA_5G10570)__co<U+FB01>lin_(AFUA_5G10570)#746128#Aspergillus_fumigatus#unaffected_pathogenicity__reduced_virulence	43.506	4.29e-36	124
g9247.t1	P34809#PHI:19#NMT#5207#Cryptococcus_neoformans#reduced_virulence	43.496	3.68e-134	403
g12737.t1	J9VNZ8#PHI:3528#PHO89#5207#Cryptococcus_neoformans#reduced_virulence	43.464	1.72e-154	459
g10748.t1	P21264#PHI:501#ADE2#4932#Saccharomyces_cerevisiae#reduced_virulence	43.443	3.88e-162	479
g8824.t1	I1RCP3#PHI:1478#GzHMG010#5518#Fusarium_graminearum#unaffected_pathogenicity	43.438	1.98e-119	364
g7995.t1	I1RR34#PHI:5835#Fgsg06541#5518#Fusarium_graminearum#unaffected_pathogenicity	43.415	6.77e-111	334
g1072.t1	Q9UW18#PHI:469#TOXG#5017#Bipolaris_zeicola#reduced_virulence	43.413	5e-91	282
g12636.t1	Q3Y5V5#PHI:1018__PHI:2042#ABC3#318829#Magnaporthe_oryzae#loss_of_pathogenicity	43.393	0	1107
g12726.t1	I1RLI0#PHI:1716#GzZC031#5518#Fusarium_graminearum#unaffected_pathogenicity	43.39	1.56e-154	470
g6772.t1	G4MVX4#PHI:3216#MoCDIP4#318829#Magnaporthe_oryzae#effector_(plant_avirulence_determinant)	43.363	3.78e-38	139
g9171.t1	Q9X4G0#PHI:5042#hmgA#287#Pseudomonas_aeruginosa#increased_virulence_(hypervirulence)__reduced_virulence	43.35	2.34e-111	340
g11050.t1	C6ZRH8#PHI:2976#CgOPT1#474922#Colletotrichum_gloeosporioides#reduced_virulence	43.348	0	608
g12893.t1	G4NHT5#PHI:5612#FZC20#318829#Magnaporthe_oryzae#unaffected_pathogenicity	43.311	6.08e-149	453
g11975.t1	G4MVC5#PHI:6927#MoRAD6#318829#Magnaporthe_oryzae#reduced_virulence	43.307	1.34e-33	117
g5986.t1	J9VNE4#PHI:7828#Uxt1#5207#Cryptococcus_neoformans#reduced_virulence__unaffected_pathogenicity	43.275	2.34e-86	269
g5678.t1	I1S6B4#PHI:1732#GzZC047#5518#Fusarium_graminearum#unaffected_pathogenicity	43.257	4.01e-162	485
g635.t1	P0AA28#PHI:2644#thioredoxin_1#28901#Salmonella_enterica#reduced_virulence	43.243	2.34e-17	73.6
g404.t1	I1S0N5#PHI:1552#GzMyb016#5518#Fusarium_graminearum#unaffected_pathogenicity	43.218	1.24e-75	275
g6218.t1	U3PW09#PHI:7047#Aqp1#5207#Cryptococcus_neoformans#unaffected_pathogenicity	43.2	4.61e-62	202
g2861.t1	G4MLZ9#PHI:5633#FZC38#318829#Magnaporthe_oryzae#unaffected_pathogenicity	43.164	9.82e-87	281
g9503.t1	I1S2J6#PHI:9039#fgm2_(FGSG_10992)#5518#Fusarium_graminearum#reduced_virulence	43.137	9.29e-75	235
g8183.t1	Q3Y5V5#PHI:1018__PHI:2042#ABC3#318829#Magnaporthe_oryzae#loss_of_pathogenicity	43.102	0	1107
g5550.t1	I1S1Q9#PHI:1786#GzZC101#5518#Fusarium_graminearum#unaffected_pathogenicity	43.096	1.17e-120	364
g3512.t1	J9VQQ5#PHI:7208#mlh1#5207#Cryptococcus_neoformans#unaffected_pathogenicity	43.079	0	582
g10299.t1	O93841#PHI:243#CHIP6#474922#Colletotrichum_gloeosporioides#reduced_virulence	43.077	0	687
g11030.t1	G4MR15#PHI:2088#Moatg27#318829#Magnaporthe_oryzae#unaffected_pathogenicity	43.077	2.89e-94	288
g11923.t1	F9X691#PHI:4914#ZtCBR1#1047171#Zymoseptoria_tritici#reduced_virulence	43.066	2.16e-74	238
g7352.t1	W7N2A8#PHI:3383#FVEG_12531#117187#Fusarium_verticillioides#unaffected_pathogenicity	43.052	3.28e-99	308
g1831.t1	I1RHQ1#PHI:7651#FgPR-IL-4#5518#Fusarium_graminearum#reduced_virulence	43.028	8.18e-51	167
g9916.t1	Q4WER9#PHI:8934#ldpA_(Afu5g03980)#746128#Aspergillus_fumigatus#unaffected_pathogenicity	42.975	1.08e-51	186
g3563.t1	Q59TZ8#PHI:8971#Caglk1#5476#Candida_albicans#reduced_virulence__unaffected_pathogenicity	42.97	7.64e-120	371
g4202.t1	I1S1A5#PHI:1755#GzZC070#5518#Fusarium_graminearum#unaffected_pathogenicity	42.965	2.71e-174	513
g2319.t1	I1RMP5#PHI:5806#Fgsg05239#5518#Fusarium_graminearum#unaffected_pathogenicity	42.933	1.4e-92	290
g1774.t1	I1RIQ3#PHI:1575#GzOB015#5518#Fusarium_graminearum#unaffected_pathogenicity	42.932	2.29e-38	138
g358.t1	C3JXE8#PHI:2835#RED2#5016#Bipolaris_maydis#reduced_virulence	42.929	8.4e-49	167
g4439.t1	Q882F5#PHI:7788#AldB_(PSPTO_2673)#317#Pseudomonas_syringae#reduced_virulence	42.917	1.4e-128	386
g3020.t1	A0A0A2JPI4#PHI:8719#PePpi#27334#Penicillium_expansum#unaffected_pathogenicity	42.909	1.54e-47	161
g10278.t1	Q9Y8A2#PHI:255#FUM1_(FUM5)#5127#Fusarium_fujikuroi#unaffected_pathogenicity	42.891	0	1602
g8421.t1	B0YAP6#PHI:2297#tmpL#746128#Aspergillus_fumigatus#reduced_virulence	42.857	0	603
g7681.t1	I1RQU8#PHI:1714#GzZC029#5518#Fusarium_graminearum#lethal	42.857	5.69e-175	523
g9958.t1	G5EHL4#PHI:9054#MoMCP1#318829#Magnaporthe_oryzae#reduced_virulence	42.857	1.78e-70	225
g118.t1	I1RNY0#PHI:1893#GzZC208#5518#Fusarium_graminearum#unaffected_pathogenicity	42.857	8.51e-33	123
g9166.t1	I1RWY8#PHI:1821#GzZC136#5518#Fusarium_graminearum#unaffected_pathogenicity	42.857	3.7e-16	75.5
g6252.t1	Q71XE6#PHI:6137__PHI:7070#PrsA2__prsA2#1639#Listeria_monocytogenes#reduced_virulence__unaffected_pathogenicity	42.857	8.83e-14	65.9
g6841.t1	Q4WLS1#PHI:2543#GCD6#746128#Aspergillus_fumigatus#lethal__loss_of_pathogenicity	42.833	2.57e-162	487
g3877.t1	I1S0N2#PHI:1849#GzZC164#5518#Fusarium_graminearum#unaffected_pathogenicity	42.739	7e-163	499
g2996.t1	I1RXD4#PHI:1596#GzOB036#5518#Fusarium_graminearum#unaffected_pathogenicity	42.708	7.2e-66	214
g11291.t1	I1RC95#PHI:1566#GzOB006#5518#Fusarium_graminearum#lethal	42.683	9.72e-54	191
g5653.t1	Q7Z8E8#PHI:419#CSH1#5476#Candida_albicans#reduced_virulence	42.679	9.33e-80	255
g8417.t1	I1RDG6#PHI:1555#GzMyb019#5518#Fusarium_graminearum#unaffected_pathogenicity	42.659	5.74e-144	430
g4523.t1	G4MSV0#PHI:875#MGG_04587#318829#Magnaporthe_oryzae#loss_of_pathogenicity	42.638	0	787
g6616.t1	Q6Y392#PHI:1085#Ptr2#13684#Parastagonospora_nodorum#unaffected_pathogenicity	42.62	4.53e-148	442
g7922.t1	D3W9Z8#PHI:3907#ZrfC#746128#Aspergillus_fumigatus#reduced_virulence__loss_of_pathogenicity	42.617	2.06e-122	372
g2960.t1	Q4WQ36#PHI:6751#Fbx23#746128#Aspergillus_fumigatus#increased_virulence_(hypervirulence)	42.6	4.8e-159	494
g5491.t1	I1S9C7#PHI:1726#GzZC041#5518#Fusarium_graminearum#unaffected_pathogenicity	42.584	5.67e-32	127
g4267.t1	O59939#PHI:222#PELB#474922#Colletotrichum_gloeosporioides#reduced_virulence	42.57	5.31e-55	188
g3093.t1	A0A1C3YMM2#PHI:5872#Fgsg02853#5518#Fusarium_graminearum#unaffected_pathogenicity	42.568	5.68e-74	235
g7412.t1	A7F952#PHI:4482#SSITL#5180#Sclerotinia_sclerotiorum#reduced_virulence	42.545	1.02e-56	193
g2230.t1	Q63IP8#PHI:6885#BPSS2021#28450#Burkholderia_pseudomallei#reduced_virulence	42.459	5.72e-107	332
g7066.t1	A0A098DM90#PHI:5864#GCD12#5518#Fusarium_graminearum#unaffected_pathogenicity	42.453	1.39e-111	339
g11123.t1	Q5A7M9#PHI:4992#rhr2#5476#Candida_albicans#reduced_virulence	42.453	2.63e-46	156
g5617.t1	Q9P927#PHI:368#NOT4#5476#Candida_albicans#reduced_virulence	42.442	1.21e-77	270
g12378.t1	F9XFI6#PHI:8596#ZtPks7#1047171#Zymoseptoria_tritici#unaffected_pathogenicity	42.435	0	1870
g5306.t1	Q58Z64#PHI:423#VAD1#5207#Cryptococcus_neoformans#reduced_virulence	42.432	1.39e-95	301
g1128.t1	D2E9W8#PHI:2377#DEP3#29001#Alternaria_brassicicola#reduced_virulence__unaffected_pathogenicity	42.396	8.13e-48	166
g1731.t1	W5ZQ93#PHI:3417#Ohmm#176275#Beauveria_bassiana#increased_virulence_(hypervirulence)	42.384	1.38e-107	343
g6789.t1	G4N7X4#PHI:6614#Mocapn7#318829#Magnaporthe_oryzae#reduced_virulence	42.375	0	668
g5148.t1	A0A1C3YMS1#PHI:5868#Fgsg12463#5518#Fusarium_graminearum#unaffected_pathogenicity	42.373	9.77e-89	277
g7270.t1	G4MVC5#PHI:6927#MoRAD6#318829#Magnaporthe_oryzae#reduced_virulence	42.308	1.06e-25	100
g9508.t1	Q5NH02#PHI:4732#FTT0673p/prsAp#263#Francisella_tularensis#unaffected_pathogenicity	42.271	1.14e-83	258
g1517.t1	A0A098DRE2#PHI:5846#Fgsg07655#5518#Fusarium_graminearum#unaffected_pathogenicity	42.262	2e-83	258
g5623.t1	Q1KSF2#PHI:3102#BCKDH#5811#Toxoplasma_gondii#reduced_virulence	42.243	2.97e-113	343
g11358.t1	Q2VLJ1#PHI:716#ZEB1#5518#Fusarium_graminearum#unaffected_pathogenicity	42.213	4.17e-60	200
g3179.t1	T2C913#PHI:3225#Ndo1#36651#Penicillium_digitatum#unaffected_pathogenicity	42.164	2.29e-69	233
g12235.t1	E3QNW8#PHI:6228#KRE6#31870#Colletotrichum_graminicola#reduced_virulence	42.157	2.46e-104	320
g10206.t1	J4WD57#PHI:7593#VVD#176275#Beauveria_bassiana#reduced_virulence	42.132	4.31e-52	168
g11016.t1	I1RD70#PHI:1264#FGSG_01559#5518#Fusarium_graminearum#unaffected_pathogenicity	42.121	1.04e-77	243
g8402.t1	I1RFK9#PHI:1269#FGSG_02488#5518#Fusarium_graminearum#unaffected_pathogenicity	42.105	1.73e-86	283
g161.t1	G4MSY9#PHI:8648#Poime4_(MGG_01492)#318829#Magnaporthe_oryzae#reduced_virulence	42.091	4.78e-93	285
g1703.t1	Q882F5#PHI:7788#AldB_(PSPTO_2673)#317#Pseudomonas_syringae#reduced_virulence	42.083	1.58e-121	368
g5780.t1	I1RE91#PHI:8925#FgPLD2_(FGSG_01973)#5518#Fusarium_graminearum#unaffected_pathogenicity	42.062	0	616
g11432.t1	Q9C2Y1#PHI:278__PHI:1028#BCPME1__bcpme1#40559#Botrytis_cinerea#unaffected_pathogenicity__reduced_virulence	42.056	6.4e-75	236
g7700.t1	I1S3I1#PHI:1857#GzZC172#5518#Fusarium_graminearum#unaffected_pathogenicity	42.049	0	570
g6854.t1	D3W9Z8#PHI:3907#ZrfC#746128#Aspergillus_fumigatus#reduced_virulence__loss_of_pathogenicity	42.045	4.59e-119	367
g12000.t1	J4UPL6#PHI:5394#mas5#176275#Beauveria_bassiana#loss_of_pathogenicity	42.029	1.69e-10	58.9
g5495.t1	I1RC95#PHI:1566#GzOB006#5518#Fusarium_graminearum#lethal	42.025	1.53e-94	299
g3082.t1	Q882F5#PHI:7788#AldB_(PSPTO_2673)#317#Pseudomonas_syringae#reduced_virulence	42.017	2.41e-124	375
g2939.t1	P29138#PHI:4615#Pr1#5530#Metarhizium_anisopliae#unaffected_pathogenicity	41.975	1.36e-83	263
g8705.t1	G4YQK3#PHI:6261#PsAAT3#67593#Phytophthora_sojae#reduced_virulence	41.954	8.96e-83	261
g8294.t1	C5P3X6#PHI:479#MEP1#199306#Coccidioides_posadasii#reduced_virulence	41.949	9.64e-48	162
g10756.t1	J9VNZ8#PHI:3528#PHO89#5207#Cryptococcus_neoformans#reduced_virulence	41.947	8.93e-132	400
g2339.t1	Q5A5P7#PHI:4891#orf19.5352#5476#Candida_albicans#unaffected_pathogenicity	41.946	1.18e-71	237
g978.t1	Q7ZA26#PHI:139#CAP10#5207#Cryptococcus_neoformans#reduced_virulence	41.935	4.32e-20	89.4
g6421.t1	G4N6P7#PHI:6902#MoAtg14#318829#Magnaporthe_oryzae#loss_of_pathogenicity	41.892	2.38e-109	334
g2892.t1	I1RNU2#PHI:1895#GzZC210#5518#Fusarium_graminearum#unaffected_pathogenicity	41.877	0	537
g2551.t1	W7N2A8#PHI:3383#FVEG_12531#117187#Fusarium_verticillioides#unaffected_pathogenicity	41.86	6.04e-94	302
g9547.t1	G4MLK2#PHI:8040__PHI:8047#Mouba2__Uba2#318829#Magnaporthe_oryzae#reduced_virulence	41.86	2.46e-43	161
g10819.t1	I1RN15#PHI:1456#GzAra004#5518#Fusarium_graminearum#unaffected_pathogenicity	41.852	5.54e-126	389
g7910.t1	A0A075TRB3#PHI:3301#patN#27334#Penicillium_expansum#unaffected_pathogenicity	41.825	1.2e-61	197
g4662.t1	I1RNA9#PHI:1508#GzHOME003#5518#Fusarium_graminearum#unaffected_pathogenicity	41.818	2.74e-86	293
g11850.t1	O93841#PHI:243#CHIP6#474922#Colletotrichum_gloeosporioides#reduced_virulence	41.816	0	635
g649.t1	I1RMT3#PHI:1664#GzCCHC004#5518#Fusarium_graminearum#unaffected_pathogenicity	41.785	5.69e-66	231
g3444.t1	Q2YPX3#PHI:8922#lon#235#Brucella_abortus#unaffected_pathogenicity__reduced_virulence	41.753	1.95e-169	523
g11648.t1	I1RHL8#PHI:5876#Fgsg03277#5518#Fusarium_graminearum#unaffected_pathogenicity	41.727	1.82e-34	126
g735.t1	I1S7L4#PHI:1430#GzC2H098#5518#Fusarium_graminearum#unaffected_pathogenicity	41.667	1.78e-65	211
g6580.t1	A0A095CIZ4#PHI:6188#Ubp5#552467#Cryptococcus_gattii_vgiii#reduced_virulence	41.652	0	830
g10033.t1	I1S2C4#PHI:5068#MCC#5518#Fusarium_graminearum#reduced_virulence	41.63	2.47e-102	346
g7719.t1	T2C913#PHI:3225#Ndo1#36651#Penicillium_digitatum#unaffected_pathogenicity	41.627	1.64e-121	362
g11398.t1	Q8MPM3#PHI:8028#Tkt#5665#Leishmania_mexicana#loss_of_pathogenicity	41.571	2.47e-171	510
g3834.t1	G4N1P8#PHI:5440#ABA4#318829#Magnaporthe_oryzae#reduced_virulence	41.538	1.46e-59	191
g11765.t1	P87199#PHI:465#KIN2#5270#Ustilago_maydis#reduced_virulence	41.504	1.01e-64	239
g7581.t1	Q5ZVD8#PHI:6520#LpdA#446#Legionella_pneumophila#effector_(plant_avirulence_determinant)	41.485	5.91e-108	333
g1742.t1	Q99324#PHI:191#TOM1#39703#Septoria_lycopersici#unaffected_pathogenicity	41.472	0	559
g10287.t1	I1RJ45#PHI:6120#FGSG_03846#5518#Fusarium_graminearum#reduced_virulence	41.463	5.52e-100	309
g9022.t1	D3QJB2#PHI:3526#lacA#28901#Salmonella_enterica#reduced_virulence	41.451	5.51e-44	148
g12382.t1	I1RDG6#PHI:1555#GzMyb019#5518#Fusarium_graminearum#unaffected_pathogenicity	41.414	2e-136	409
g5039.t1	P07637#PHI:2624__PHI:6460__PHI:6586#aroA#28901#Salmonella_enterica#reduced_virulence	41.41	1.71e-80	273
g10675.t1	Q88BC5#PHI:7787#AldA_(PSPTO_0092)#317#Pseudomonas_syringae#reduced_virulence	41.408	1.15e-110	340
g1993.t1	I1RPX8#PHI:1581#GzOB021#5518#Fusarium_graminearum#unaffected_pathogenicity	41.379	2.07e-65	211
g9715.t1	A5IXN3#PHI:4610#pdhB#2110#Mycoplasma_agalactiae#reduced_virulence	41.346	5.45e-69	223
g7050.t1	Q00903#PHI:24#Avenacinase#29850#Gaeumannomyces_graminis#unaffected_pathogenicity__loss_of_pathogenicity	41.339	1.78e-175	527
g11180.t1	Q2FH26#PHI:7353#odhB#1280#Staphylococcus_aureus#unaffected_pathogenicity	41.33	4.92e-97	300
g11513.t1	E0SGC8#PHI:8570#metB_(Dda3937_03888)#204038#Dickeya_dadantii#reduced_virulence	41.316	1.4e-85	269
g4244.t1	Q00903#PHI:24#Avenacinase#29850#Gaeumannomyces_graminis#unaffected_pathogenicity__loss_of_pathogenicity	41.314	1.82e-156	485
[truncated: 2,415 more rows]

## Sheet: CBS 226.31
Supplementary Table 5. The BLASTP analysis of homologues of the nectriaceous species genes in PHI-base
[truncated: 4,424 more rows]

[truncated: 3 more sheets: CBS 125109, CBS 177.27, All various]
